# Supplementary material for: MDM2 Influences ACE2 Stability and SARS-CoV-2 Uptake
Source: Viruses. 2023 Aug 18;15(8):1763. doi: 10.3390/v15081763 (PMC10459000; doi:10.3390/v15081763)
Supplement: Supplementary file 1 [file viruses-15-01763-s001.zip]

Archive with 4 entries (4 files):
- Supplementary Figures.pdf
- Supplementary Table 1.xlsx
- Supplementary Table 2.xlsx
- Supplementary Table 3.txt
