# Supplementary material for: MDM2 Influences ACE2 Stability and SARS-CoV-2 Uptake
Source: Viruses. 2023 Aug 18;15(8):1763. doi: 10.3390/v15081763 (PMC10459000; doi:10.3390/v15081763)
Supplement: Supplementary file 1 [file viruses-15-01763-s001.zip › Supplementary Table 1.xlsx]

## Sheet: Master
Gene Symbol	Sample_ID	crRNA
MMP15	MMP15_1	CUUCUUUGCAGAACUGGCUG
	MMP15_2	AUGGUGGACAUAUGGCGGCU
	MMP15_3	CAUGGUGGACAUAUGGCGGC
SLC30A1	SLC30A1_1	GCCGCAGCCAUGGGGUGUUG
	SLC30A1_2	GGGUGUUGGGGUCGGAACCG
	SLC30A1_3	GUUGGGGUCGGAACCGGGGC
OSMR	OSMR_1	UUAAGUGAUACAGGAGUCAA
	OSMR_2	CCUGAUGAUAAGGAAGGUUG
	OSMR_3	UCAAUUCCUGAUGAUAAGGA
SHC1	SHC1_1	GAGCUGAGCGGGCGGCUACA
	SHC1_2	CCAGGAUAGAGCUGAGCGGG
	SHC1_3	CGCCCGCUCAGCUCUAUCCU
GPR39	GPR39_1	GGGAGCAGUCACUGCCCGGG
	GPR39_2	AUGACUGUGAUCAAUGAUUU
	GPR39_3	AGGUGGCCACCUCAAACUCG
PTPRM	PTPRM_1	UCAUGCUGGUGAAUGCCUCU
	PTPRM_2	AUGCCUCUGGGAGACCUGAG
	PTPRM_3	AAGUUGGGGUAAGAGCAGGU
LTBP1	LTBP1_1	CACCAUUCAUACAUGGAAGA
	LTBP1_2	CAUCUUCCAUGUAUGAAUGG
	LTBP1_3	AUGGUGGCCAGUGCAGUUCA
DCBLD2	DCBLD2_1	GGAUGUGGACACACUGUACU
	DCBLD2_2	AUGUAAGGGUUCCACUCUCA
	DCBLD2_3	GAUGUAAGGGUUCCACUCUC
MDM2	MDM2_1	UUGUUUUAGGAUCUUGAUGC
	MDM2_2	GCUGGUGUAAGUGAACAUUC
	MDM2_3	GAUUAUAGCCUUAGUGAAGA
CDH16	CDH16_1	CAGUUGCCGCUGCCCCGUGA
	CDH16_2	AGUUGCCGCUGCCCCGUGAG
	CDH16_3	AGUCCCCUGACAGCACGAUC
NECTIN3	NECTIN3_1	CUUAGCUGGACCAAUUAUUG
	NECTIN3_2	CCCCAUACUGCUGUGACAUG
	NECTIN3_3	AGCCACAUGUCACAGCAGUA
PCDHGC3	PCDHGC3_1	CAUCGCCAUUUUGGGAGCUG
	PCDHGC3_2	UCAUCGCCAUUUUGGGAGCU
	PCDHGC3_3	UCCCAAAAUGGCGAUGACAC
PCDHA4	PCDHA4_1	ACUAAAGAUGGAGUUUUCCU
	PCDHA4_2	GUUUUCCUGGGGAAGCGGCC
	PCDHA4_3	AAGUAAGAGCAGCAGACGCC
PCDHAC2	PCDHAC2_1	GCGGCCAGUGGCUAUGGAGC
	PCDHAC2_2	GCAGGCGGGCACCAGACCUG
	PCDHAC2_3	CGUGGAUGCUCUGUCGCCGC
PLXNA1	PLXNA1_1	UUCACACAGUUCAGGGUCUG
	PLXNA1_2	CUCAGGGUUCACACAGUUCA
	PLXNA1_3	UGCACCUGAGGUGCCGGUGA
STX10	STX10_1	CCGCAGCGAGGUGCAGAAGG
	STX10_2	AAGGCGGUGAACACGGCCCG
	STX10_3	AGGCGGUGAACACGGCCCGC
STX12	STX12_1	UGAAGUCUCUGCUGGCGCUA
	STX12_2	ACGAGAUCCAGCUCUUGCUC
	STX12_3	AGUAUUGCCAGAGCAAGAGC
STX16	STX16_1	UGCCUGACACCAGUGCCAUA
	STX16_2	GACCGUAUGGCACUGGUGUC
	STX16_3	UUAGAUCCAGAAGCAGCGAU
STX6	STX6_1	GGCAGCCAGAACUGGAGCAC
	STX6_2	AACAGAUAAAUAUGGGCGUC
	STX6_3	AGCCAAUUCUCAUUUCAUUG
VTI1A	VTI1A_1	CCUCUUCUAGCUUGAACAGA
	VTI1A_2	UACAUCCCUCGACUUUGGGG
	VTI1A_3	CUGUACAUCCCUCGACUUUG
FABP5	FABP5_1	GACUUAACAUUCUACAGGAG
	FABP5_2	ACUUAACAUUCUACAGGAGU
	FABP5_3	AGCUGAUGGCAGAAAAACUC
CEMIP2 (TMEM2)	CEMIP2_1	CAUGUAUGCCACUGAUUCCA
	CEMIP2_2	AUGUAUGCCACUGAUUCCAG
	CEMIP2_3	GAAAGCAGGGGAGUGUCCCC
TNS4	TNS4_1	CGUUCUCCUGAGGCUCUGUC
	TNS4_2	AGGUGGCAUACGUUCUCCUG
	TNS4_3	GAACGUAUGCCACCUCUUUG
LY6E	LY6E_1	GCACAUCAGCGAGCUGGCUG
	LY6E_2	GGAGAAGCACAUCAGCGAGC
	LY6E_3	AUUGCUCUUCUGGUUCAAGC
NTC	NTC_1	ACGGAGGCUAAGCGUCGCAA
	NTC_2	CGCUUCCGCGGCCCGUUCAA
	NTC_3	AUCGUUUCCGCUUAACGGCG
