# Supplementary material for: MDM2 Influences ACE2 Stability and SARS-CoV-2 Uptake
Source: Viruses. 2023 Aug 18;15(8):1763. doi: 10.3390/v15081763 (PMC10459000; doi:10.3390/v15081763)
Supplement: Supplementary file 1 [file viruses-15-01763-s001.zip › Supplementary Table 2.xlsx]

## Sheet: Sheet1
Significant	P-value	Difference	Protein IDs	Majority protein IDs	Protein names	Gene names	id	Show label	Only identified by site	Reverse	Potential contaminant	Peptides	Razor + unique peptides	Unique peptides	Sequence coverage [%]	Unique + razor sequence coverage [%]	Unique sequence coverage [%]	Mol. weight [kDa]	Score	Intensity	iBAQ peptides	MS/MS count	LFQ intensity MDM2KO_1	LFQ intensity MDM2KO_2	LFQ intensity MDM2KO_3	LFQ intensity MDM2KO_4	LFQ intensity NTC_1	LFQ intensity NTC_2	LFQ intensity NTC_3	LFQ intensity NTC_4
	0.728363	-0.169909	A0A024QZX5;A0A087X1N8;P35237;A0A2R8YD12;A0A2R8Y6A7;A0A2R8YDD0;A0A2R8Y517;C9JTJ8;C9JVA8	A0A024QZX5;A0A087X1N8;P35237;A0A2R8YD12	Serpin B6	SERPINB6	0					13	13	12	41.8	41.8	39.7	43.024	78.359	5039400000	21	87	26.7478	26.6629	26.6839	26.7919	26.5702	26.9268	27.0449	27.0242
	0.81479	-0.86432	A0A024R0K5;P06731;A0A087WYX0;M0QX98;T2HUW8;M0R3J1;M0QXR5;P31997	A0A024R0K5;P06731;A0A087WYX0;M0QX98;T2HUW8	Carcinoembryonic antigen-related cell adhesion molecule 5	CEACAM5	1					6	6	3	12.4	12.4	6.3	76.795	98.163	1566000000	28	37	25.6984	26.0029	23.9467	26.2447	26.1189	26.4997	26.2623	26.4692
+	1.87372	-1.01824	A0A024R161;F2Z3D1;J3QR79;P50151;Q9H1X3	A0A024R161;F2Z3D1;J3QR79;P50151;Q9H1X3	Guanine nucleotide-binding protein subunit gamma;Guanine nucleotide-binding protein G(I)/G(S)/G(O) subunit gamma-10;DnaJ homolog subfamily C member 25	hCG_1994888;DNAJC25;GNG10	2					2	2	2	19.6	19.6	19.6	16.499	5.2049	138890000	8	8	23.6689	22.3819	23.2379	23.5701	24.2496	24.1514	24.2593	24.2716
	0.0316896	-0.019918	A0A024R3M2;A0A2R8Y5X2;J3KNL5;A0A1B0GWG7;A0A1B0GUD6;Q3KR37;E9PRD6	A0A024R3M2;A0A2R8Y5X2;J3KNL5;A0A1B0GWG7;A0A1B0GUD6;Q3KR37;E9PRD6	GRAM domain-containing protein 1B	hCG_39893;GRAMD1B	5					2	2	2	3.5	3.5	3.5	80.628	7.6068	242460000	37	11	24.1414	24.6793	24.1887	23.8269	24.1487	24.5699	23.9709	24.2266
	1.3624	0.0928349	A0A024R4E5;Q00341;H0Y394;H7C0A4;C9JIZ1;C9J5E5;C9JZI8;H7C2D1;H7BZC3;C9JES8;C9JHZ8;C9JHS7;C9JK79;C9JT62;C9JHN6;C9JEJ8;C9JBS3;C9JQ82;C9JMQ6	A0A024R4E5;Q00341;H0Y394	Vigilin	HDLBP	6					40	40	40	37.1	37.1	37.1	141.44	221.5	16875000000	66	335	28.3078	28.3283	28.3055	28.2356	28.1173	28.1997	28.2347	28.2542
	0.0852799	-0.0165772	A0A024R571;Q9H4M9;C9JC03;C9J2Z4;C9JDQ8;C9JIJ3;C9IZH1	A0A024R571;Q9H4M9;C9JC03;C9J2Z4	EH domain-containing protein 1	EHD1	8					24	24	12	58.8	58.8	35.2	61.927	161.9	12583000000	29	239	27.2337	27.0275	27.0411	26.9172	27.1243	27.0155	27.1022	27.0439
	0.810803	-0.761883	K7EN05;K7EPC8;A0A024R7E8;K7EQ44;K7EMV4;P60002	K7EN05;K7EPC8;A0A024R7E8;K7EQ44;K7EMV4;P60002	Transcription elongation factor 1 homolog	ELOF1	9					1	1	1	23.7	23.7	23.7	8.6531	4.7966	219400000	1	4	22.9918	22.9754	23.588	22.5644	24.8685	24.0375	23.114	23.1471
+	3.6826	-0.346721	A0A024RA52;P25787;A0A7I2V2H3;A0A7I2YQP7;C9JCK5;H3BT36	A0A024RA52;P25787;A0A7I2V2H3	Proteasome subunit alpha type;Proteasome subunit alpha type-2	PSMA2	10					8	8	8	46.2	46.2	46.2	25.898	181.01	13730000000	13	134	28.3679	28.3149	28.1995	28.3264	28.6416	28.5841	28.6738	28.696
	1.68706	-0.470137	A0A024RAC6;Q14241	A0A024RAC6;Q14241	Transcription elongation factor B polypeptide 3	TCEB3	11					2	2	2	2.6	2.6	2.6	87.229	4.6536	248790000	37	21	22.9429	23.2601	22.5656	22.977	23.359	23.3131	23.5379	23.4161
	1.42905	-0.21619	P46379;A0A7I2V508;A0A0G2JK23;A0A024RCR6;A0A7P0MQS5;A0A0G2JL47;A0A0G2JJM1;X6REW1;F6S6P2;F6X9W3;F6U341;F6VEM6;F6WML8;A0A1B0GX79;A0A0G2JJR8;A0A7I2V3H1;F6XTU0;F6U1F2;F6UR09;H0Y710;F6TC96;H0Y4L1	P46379;A0A7I2V508;A0A0G2JK23;A0A024RCR6;A0A7P0MQS5;A0A0G2JL47;A0A0G2JJM1;X6REW1;F6S6P2	Large proline-rich protein BAG6	BAG6;BAT3	12					20	20	20	23.6	23.6	23.6	119.41	142.71	4869900000	33	149	25.9745	26.3331	26.1291	26.0837	26.3324	26.3994	26.3882	26.2652
	0.930421	0.644727	E5RGD6;E5RFN5;A0A075B6P0;Q330K2	E5RGD6;E5RFN5;A0A075B6P0;Q330K2	NADH dehydrogenase (ubiquinone) complex I, assembly factor 6	NDUFAF6	13					1	1	1	12.7	12.7	12.7	12.029	2.8589	61263000	3	9	22.9276	22.9521	22.9384	24.0588	22.3103	23.101	22.7365	22.1502
+	2.4105	1.7003	A0A087WTN9;A0A075B752;Q5VT79;P13928;A0A087WUP0;B4DTF2;A0A075B765	A0A087WTN9;A0A075B752;Q5VT79;P13928;A0A087WUP0;B4DTF2;A0A075B765	Annexin;Annexin A8-like protein 2;Annexin A8	ANXA8;ANXA8L1;ANXA8L2	15					2	2	2	7.4	7.4	7.4	40.689	4.1292	220780000	18	8	24.8652	25.0721	24.7981	24.5702	23.8111	22.6105	23.6726	22.4102
	0.167211	-0.174683	A0A075B784;Q9P275;E9PEW0;K7EJI3;U3KQ92;K7ERC1;K7ELT3;K7EQS0;K7EPT1;K7ELR5;Q8IXW9	A0A075B784;Q9P275	Ubiquitin carboxyl-terminal hydrolase;Ubiquitin carboxyl-terminal hydrolase 36	USP36	17					6	6	6	7.9	7.9	7.9	104.39	7.5295	335060000	56	15	24.9371	23.4713	24.6374	24.8301	25.0263	24.0589	24.5513	24.9382
	0.29999	0.179673	A0A075B785;A0A2R8Y566;Q9P260	A0A075B785;A0A2R8Y566;Q9P260	LisH domain and HEAT repeat-containing protein KIAA1468	KIAA1468	18					4	4	4	4.9	4.9	4.9	112.71	10.025	133490000	47	16	23.2351	23.0859	24.0954	23.3358	23.0172	23.4573	23.4383	23.1207
	0.354735	-0.0273747	F8W809;A0A087WSW9;A0A182DWI3;A0A087WSY9;Q16881;E9PIR7;E2QRB9;E9PKD3;A0A0B4J225;E9PIZ5;E9PLT3;E9PKI4;E9PQI3;E9PRI8;E9PJU2	F8W809;A0A087WSW9;A0A182DWI3;A0A087WSY9;Q16881;E9PIR7;E2QRB9;E9PKD3	Thioredoxin reductase 1, cytoplasmic	TXNRD1	19					19	19	18	53.2	53.2	50.2	54.603	323.31	53889000000	25	324	29.2797	29.3931	29.2666	29.3492	29.3101	29.3467	29.3615	29.3799
	0.833276	0.340192	A0A087WSZ7;A0A1B0GW84;Q08499;D6RHE0;K7EKV1;E9PJ03;E9PNB0;E9PR34;K7ENX7;Q32MM7;Q08493;P27815	A0A087WSZ7;A0A1B0GW84;Q08499;D6RHE0	cAMP-specific 3,5-cyclic phosphodiesterase 4D	PDE4D	20					6	6	5	11.4	11.4	9.9	77.022	40.259	736490000	31	35	24.4216	25.2284	24.5564	24.3707	24.3791	24.2449	24.3905	24.2018
	0.377728	0.130441	A0A087WT44;P30519;I3L159;I3L1F5;I3L1Y2;I3L276;I3L4P8;A0A1B0GXH0;I3L463	A0A087WT44;P30519;I3L159;I3L1F5	Heme oxygenase 2	HMOX2	23					6	6	6	24.9	24.9	24.9	41.669	48.958	1436800000	20	48	25.7151	26.0721	26.1543	25.9468	26.0818	25.7311	25.9808	25.5729
	2.58526	0.385974	A0A087WT99;Q9H0W9;E9PJU8;E9PQS1;A0A1W2PRB8;E9PPB5;E9PR95;E9PSC3;E9PLC5;E9PLB3;E9PIP1	A0A087WT99;Q9H0W9;E9PJU8;E9PQS1;A0A1W2PRB8;E9PPB5	Ester hydrolase C11orf54	C11orf54	24					7	7	7	35.5	35.5	35.5	28.683	26.768	1576500000	14	45	25.7278	25.8523	26.0174	25.9578	25.6298	25.4929	25.4725	25.4161
	0.264834	0.0969167	A0A087WTB8;P15374;Q5TBK7	A0A087WTB8;P15374;Q5TBK7	Ubiquitin carboxyl-terminal hydrolase;Ubiquitin carboxyl-terminal hydrolase isozyme L3	UCHL3	26					8	8	8	55.2	55.2	55.2	21.945	74.944	2020800000	11	50	25.9405	25.917	25.8995	25.7002	26.182	25.6349	25.6806	25.5721
	0.709161	-0.972675	F5H5N1;A0A087WXF6;A0A087WTI3;F5GXJ1;O75251	F5H5N1;A0A087WXF6;A0A087WTI3;F5GXJ1;O75251	NADH dehydrogenase [ubiquinone] iron-sulfur protein 7, mitochondrial	NDUFS7	27					2	2	2	12.6	12.6	12.6	19.77	6.8017	721870000	10	17	25.0369	25.1019	22.5432	25.1251	25.7162	24.8286	25.5643	25.5887
	0.0726711	-0.0762324	A0A087WVC6;A0A087WTK0;Q12913	A0A087WVC6;A0A087WTK0;Q12913	Protein-tyrosine-phosphatase;Receptor-type tyrosine-protein phosphatase eta	PTPRJ	28					3	3	3	3.4	3.4	3.4	146.56	6.3863	136190000	59	8	23.9305	23.6428	23.4459	23.4938	22.6928	24.2043	23.6895	24.2313
	0.431079	-0.0268631	A0A087WTP3;M0R0C6;Q92945;M0R0I5;M0QYH3;M0QXW7;M0R3J3;M0QYG1	A0A087WTP3;M0R0C6;Q92945;M0R0I5	Far upstream element-binding protein 2	KHSRP	29					26	26	25	45.3	45.3	43.3	73.027	323.31	15534000000	34	255	27.3047	27.2455	27.2549	27.172	27.2813	27.2595	27.2689	27.2749
	0.366047	0.591464	A0A096LNJ4;A0A087WX43;D6RE84;A0A087WTT9;A0A1B0GVW6;Q9NP73;A0A096LNL2	A0A096LNJ4;A0A087WX43;D6RE84;A0A087WTT9;A0A1B0GVW6;Q9NP73	Putative bifunctional UDP-N-acetylglucosamine transferase and deubiquitinase ALG13	ALG13	30					3	3	1	28	28	14.4	14.767	6.37	375360000	8	7	24.9142	22.3453	24.771	23.9555	23.1805	23.552	24.3475	22.5401
	1.00469	-0.177067	A0A087WTV6;Q96C36;J3KR12;A0A087WZR9;A0A087WX69;A0A087WZF0	A0A087WTV6;Q96C36;J3KR12;A0A087WZR9	Pyrroline-5-carboxylate reductase 2;Pyrroline-5-carboxylate reductase	PYCR2	31					10	9	9	55.7	50.4	50.4	25.868	39.46	1464400000	16	48	25.689	25.5917	25.5406	25.4029	25.5417	25.7608	25.7631	25.8669
	0.799478	-0.169832	A0A087WVR3;A0A087WTW0;Q96T88;A0A087WWG9	A0A087WVR3;A0A087WTW0;Q96T88;A0A087WWG9	E3 ubiquitin-protein ligase UHRF1	UHRF1	32					11	11	10	18.9	18.9	17.6	91.099	31.908	1457200000	41	62	25.0244	25.0174	24.6723	24.8885	24.9516	24.9819	25.2409	25.1075
	0.665045	0.310656	A0A087WU02;Q96RQ1;H0YHJ8;H0YI58;F8W0R1;F8VR88;F8VUZ2;H0YI50;F8VPA6	A0A087WU02;Q96RQ1;H0YHJ8;H0YI58;F8W0R1;F8VR88;F8VUZ2;H0YI50;F8VPA6	Endoplasmic reticulum-Golgi intermediate compartment protein 2	ERGIC2	33					2	2	2	9.1	9.1	9.1	43.432	12.007	611600000	19	21	24.8607	25.2602	24.4225	25.145	24.3687	24.8435	24.4216	24.8121
	0.117802	-0.4644	A6NNI4;A0A2R8Y478;A0A7I2V3T0;A0A7I2V3T7;G8JLH6;A0A087WU13;F5GXT1;P21926	A6NNI4;A0A2R8Y478;A0A7I2V3T0;A0A7I2V3T7;G8JLH6;A0A087WU13;F5GXT1;P21926	Tetraspanin;CD9 antigen	CD9	35					3	3	3	22	22	22	17.764	32.004	1162400000	5	16	22.565	23.7261	26.0536	26.4679	26.133	21.7783	26.5088	26.2502
	0.187399	-0.0970912	A0A087WU65;A0A2R8YE10;Q9NRW7;A0A2R8YD95;B7Z7G7;A0A2R8YF01;A0A1B0GXI6	A0A087WU65;A0A2R8YE10;Q9NRW7;A0A2R8YD95	Vacuolar protein sorting-associated protein 45	VPS45	37					4	4	4	14.5	14.5	14.5	50.736	5.449	551570000	27	27	24.5409	24.0078	24.8238	24.2098	24.2855	24.6157	24.6831	24.3864
	0.86174	-0.211658	Q8WYA6;A0A087WUB9;A2A2P1	Q8WYA6;A0A087WUB9	Beta-catenin-like protein 1	CTNNBL1	39					10	10	10	19.4	19.4	19.4	65.173	24.507	1531900000	26	49	25.3104	25.5293	25.5801	25.6106	25.4607	25.6808	25.7797	25.9557
	2.71329	0.387628	E9PL01;A0A087WUC6;E9PI68;Q15005;E9PRB9;H0YE04	E9PL01;A0A087WUC6;E9PI68;Q15005;E9PRB9	Signal peptidase complex subunit 2	SPCS2	40					5	5	5	41.4	41.4	41.4	17.027	164.43	4453400000	9	49	27.5578	27.4547	27.5876	27.3817	26.995	27.0544	27.2589	27.123
	0.520534	-0.108692	A0A087WUK2;O14979	A0A087WUK2;O14979	Heterogeneous nuclear ribonucleoprotein D-like	HNRNPDL	44					8	7	7	21.8	19.6	19.6	40.04	114.92	11801000000	21	103	28.1615	28.543	28.2471	28.2244	28.5098	28.3224	28.3339	28.4447
+	1.71225	-1.55138	A0A087WZG9;A0A087WXK2;A0A087WUL4;A0A087WX23;Q86TG7;A0A087WYS2	A0A087WZG9;A0A087WXK2;A0A087WUL4;A0A087WX23;Q86TG7	Retrotransposon-derived protein PEG10	PEG10	46					5	5	5	16.2	16.2	16.2	40.489	16.819	387150000	15	12	24.591	22.3593	22.9599	22.9979	25.0451	24.5606	24.8607	24.6472
	0.45582	0.0440969	A0A087WUN7;H0YJ40;G3V4X6;G3V2S9;Q9GZT3;H0YJW7;H0YJ07;H0YJU7;H0YJI1	A0A087WUN7;H0YJ40;G3V4X6;G3V2S9;Q9GZT3;H0YJW7	SRA stem-loop-interacting RNA-binding protein, mitochondrial	SLIRP	48					7	7	7	72.8	72.8	72.8	10.353	60.899	9801900000	7	82	28.406	28.3997	28.2666	28.3246	28.3804	28.267	28.2572	28.3158
	2.31816	0.188585	A0A087WUT6;O60841	A0A087WUT6;O60841	Eukaryotic translation initiation factor 5B	EIF5B	49					27	27	27	26.4	26.4	26.4	138.68	186.05	9179200000	52	220	26.766	26.6422	26.6331	26.6323	26.4618	26.5524	26.4159	26.4892
	0.926754	-0.435874	C9JN51;A0A087X0G7;A0A087WUW6;A0A087X1B1;Q9Y6K9;A0A087WV30;C9J2V2;C9JH59;C9JCG6	C9JN51;A0A087X0G7;A0A087WUW6;A0A087X1B1;Q9Y6K9;A0A087WV30;C9J2V2;C9JH59	NF-kappa-B essential modulator	IKBKG	50					4	4	4	24	24	24	28.763	68.487	439220000	13	19	24.4039	23.5383	24.2491	24.5306	24.6018	24.7493	24.3667	24.7476
	0.183213	0.0581288	Q99417;A0A087WV05;A0A0D9SEI7	Q99417;A0A087WV05	C-Myc-binding protein	MYCBP	51					5	5	5	52.4	52.4	52.4	11.967	64.46	1648100000	7	33	26.3706	25.9962	26.028	25.8899	26.1711	26.0776	25.8843	25.9192
	0.57965	-0.22495	A0A087WVM4;B7ZM99;Q6UB35;H0Y327;Q4VXM1;Q4VXM0;Q5JYA8;Q5JYA3	A0A087WVM4;B7ZM99;Q6UB35	Monofunctional C1-tetrahydrofolate synthase, mitochondrial	MTHFD1L	54					12	12	12	18.9	18.9	18.9	99.31	36.728	1351000000	46	73	25.2759	25.4072	25.1005	25.5945	25.2389	25.923	25.6872	25.4288
	1.15299	-0.137875	A0A087WVQ6;Q00610;J3KS13;P53675;A0A087WX41;K7EJJ5;J3KSQ2;J3KRF5;J3QL20;F5H5N6;A0A087WV74;A0A087WXH4	A0A087WVQ6;Q00610	Clathrin heavy chain;Clathrin heavy chain 1	CLTC	55					79	79	79	57.3	57.3	57.3	192.06	323.31	137840000000	90	1004	29.6505	29.5784	29.5072	29.6843	29.8297	29.8241	29.6449	29.6732
	0.529783	0.0839987	A0A7I2V659;A0A087WVQ9;P68104;Q5VTE0;A0A7I2V5N4;A0A7I2V3H3;A0A087WV01;A6PW80;Q5JR01;A0A6Q8PFK6	A0A7I2V659;A0A087WVQ9;P68104;Q5VTE0;A0A7I2V5N4;A0A7I2V3H3;A0A087WV01	Elongation factor 1-alpha 1;Putative elongation factor 1-alpha-like 3;Elongation factor 1-alpha	EEF1A1;EEF1A1P5	56					26	26	16	65.6	65.6	42.5	49.824	323.31	515720000000	21	1778	32.6463	32.7441	32.5378	32.7552	32.7396	32.5582	32.4951	32.5545
	0.908339	-0.608506	A0A087WVT9;Q4TT34;F2Z2X0;O00746;H0Y6J0	A0A087WVT9;Q4TT34;F2Z2X0;O00746	Nucleoside diphosphate kinase;Nucleoside diphosphate kinase, mitochondrial	NME4	57					3	3	3	22.9	22.9	22.9	16.783	13.844	679330000	10	23	24.8461	24.8598	23.4649	24.7523	25.0668	25.0675	25.0968	25.126
	2.29837	-0.362377	A0A087WVZ9;P19388;A0A0A0MQR7;A0A087WWX0;A0A087WVN5	A0A087WVZ9;P19388;A0A0A0MQR7;A0A087WWX0	DNA-directed RNA polymerases I, II, and III subunit RPABC1	POLR2E	59					7	7	7	51.1	51.1	51.1	21.459	46.104	2425400000	10	62	25.6871	25.5828	25.6025	25.6429	26.1379	25.9987	26.0639	25.7643
	0.0259974	-0.00485802	A0A087WW40;Q9Y371	A0A087WW40;Q9Y371	Endophilin-B1	SH3GLB1	60					6	5	5	17.8	15.7	15.7	44.26	21.282	976830000	16	26	25.2642	25.0551	25.2459	25.1253	25.1639	25.2529	25.2221	25.071
	0.208019	-0.509563	Q9C0D9;A0A087WW58;C9JAG1	Q9C0D9;A0A087WW58;C9JAG1	Ethanolaminephosphotransferase 1	EPT1	62					2	2	2	9.3	9.3	9.3	45.228	17.452	589430000	8	13	23.239	23.8762	22.6521	25.8476	25.3997	23.7923	25.6724	22.7887
	0.096299	-0.285164	A0A590UJS8;B4DGL8;A0A087WW65;A0A5F9ZA98;O75027;A0A2R8Y473;E9PNQ5;A0A2R8Y3N2;E9PJR8	A0A590UJS8;B4DGL8;A0A087WW65;A0A5F9ZA98;O75027;A0A2R8Y473	ATP-binding cassette sub-family B member 7, mitochondrial	ABCB7	63					3	3	3	5.1	5.1	5.1	76.047	4.765	709810000	31	4	23.2363	22.7247	24.3921	26.0939	23.8468	25.4214	22.4403	25.8791
	1.23455	-0.10754	A0A087WWF6;P49005;F8W8R3;C9JLE1;C9IZD2;C9J8Z7;C9JHC7;H7C1B3	A0A087WWF6;P49005;F8W8R3;C9JLE1	DNA polymerase delta subunit 2	POLD2	65					9	9	9	26	26	26	54.695	48.595	1335700000	25	43	25.2423	25.2318	25.2448	25.1809	25.4302	25.377	25.2851	25.2376
	0.30674	0.147112	A0A494C001;A0A499FJY3;A0A087WWP4;Q96T37	A0A494C001;A0A499FJY3;A0A087WWP4;Q96T37	Putative RNA-binding protein 15	RBM15	67					6	6	6	11	11	11	98.013	29.299	861110000	50	22	24.9226	25.5058	24.9745	24.8775	25.1604	24.8591	24.5575	25.1149
	0.230348	0.0890784	I3L2Z5;A0A087WWR2;P56270;H3BQI4;I3L411;I3L4Y2;H3BPU3;I3L0M3;H3BQS2;Q9HBE1	I3L2Z5;A0A087WWR2;P56270;H3BQI4	Myc-associated zinc finger protein	MAZ	68					4	4	3	22.3	22.3	18.8	22.187	19.041	914620000	14	47	25.4134	24.9215	24.7975	25.1162	25.1603	24.7731	24.9905	24.9683
	0.369938	-0.33027	A0A087WWS1;Q96FV9;R4GMN4;A0A087WY84;R4GN58;J3KT14	A0A087WWS1;Q96FV9;R4GMN4	THO complex subunit 1	THOC1	69					7	7	7	14.5	14.5	14.5	75.651	12.628	337300000	36	11	24.2438	23.528	23.3892	23.7445	23.3085	24.9528	23.9275	24.0377
	0.64152	-0.195741	A0A087WWU8;A0A494C0P6;D6R904;A0A494C0G0;H0YL80;Q5VU61	A0A087WWU8;A0A494C0P6;D6R904		TPM3	71					17	17	5	47.6	47.6	14.1	26.42	323.31	35935000000	16	199	29.387	29.6288	29.2496	29.4532	29.3405	29.6275	29.594	29.9397
	0.0143334	0.0191131	A0A087WWW9;O95999	A0A087WWW9;O95999	B-cell lymphoma/leukemia 10	BCL10	72					2	2	2	18.9	18.9	18.9	25.102	4.3876	134600000	10	13	23.5526	23.9247	22.3505	24.221	23.2767	23.6837	23.911	23.1009
	0.506624	-0.103181	Q13148;A0A087WX29;A0A087WYY0;A0A087X260;G3V162;B1AKP7;K7EN94;A0A0A0N0M3;K7EJM5;A0A087WXQ5;A0A087WV68;A0A087WXV3;A0A087WX67;A0A087WW61;A0A0A0MSV7;K7EJ99;K7EL26;A0A087WZC9;A0A087WYE7;A0A087WTZ4	Q13148;A0A087WX29;A0A087WYY0;A0A087X260;G3V162;B1AKP7;K7EN94;A0A0A0N0M3;K7EJM5	TAR DNA-binding protein 43	TARDBP;TDP43	73					8	8	8	29.7	29.7	29.7	44.739	276.21	6850600000	13	87	27.7679	27.495	27.4654	27.4753	27.8105	27.5464	27.6751	27.5843
	0.0396553	-0.01018	O95299;E7ESZ7;A0A087WXC5;A0A7I2V594;A0A7I2V2X3;A0A7I2V4N8;A0A7I2V2N6;H7C2X4;H7C1Y7;A0A7I2V5B2;A0A7I2V5U7;A0A7I2V419;A0A7I2V458;A0A7I2V2W9;A0A7I2YQU0;A0A7I2V327;A0A7I2V438;A0A7I2V5L0;A0A7I2V3H5;C9J6X0;A0A7I2V2F6;A0A7I2V3D4;A0A7I2V2I6;Q8N1B9;H7C2W5;A0A7I2V2J5	O95299;E7ESZ7;A0A087WXC5;A0A7I2V594;A0A7I2V2X3;A0A7I2V4N8;A0A7I2V2N6;H7C2X4;H7C1Y7;A0A7I2V5B2;A0A7I2V5U7;A0A7I2V419;A0A7I2V458;A0A7I2V2W9;A0A7I2YQU0;A0A7I2V327;A0A7I2V438;A0A7I2V5L0;A0A7I2V3H5	NADH dehydrogenase [ubiquinone] 1 alpha subcomplex subunit 10, mitochondrial	NDUFA10	75					9	9	9	34.4	34.4	34.4	40.75	81.19	4350300000	20	83	26.9272	26.9494	27.2091	26.8062	27.0019	27.0072	27.0216	26.902
	1.04052	-0.0726547	A0A087WXM6;J3QQT2;J3KRX5;A0A0A6YYL6;P18621;J3QLC8;A0A0A0MRF8;J3KRB3;A0A087WWH0;J3QS96;A0A087WY81;J3KSJ0	A0A087WXM6;J3QQT2;J3KRX5;A0A0A6YYL6;P18621;J3QLC8;A0A0A0MRF8;J3KRB3;A0A087WWH0;J3QS96	60S ribosomal protein L17	RPL17;RPL17-C18orf32	76					5	5	5	40.2	40.2	40.2	19.586	162.14	32602000000	9	193	29.6931	29.7296	29.6619	29.7061	29.6938	29.7638	29.7676	29.8562
	0.741742	0.635159	P50895;A0A087WXM8;K7ENU8	P50895;A0A087WXM8;K7ENU8	Basal cell adhesion molecule	BCAM	77					2	2	2	4.9	4.9	4.9	67.404	5.0908	155390000	30	13	23.9725	24.89	23.9197	23.709	23.5462	23.9372	23.9259	22.5413
	0.0972843	-0.0151305	A0A499FIX8;H7BXI1;A0A087WXU3;A0FGR8	A0A499FIX8;H7BXI1;A0A087WXU3;A0FGR8	Extended synaptotagmin-2	ESYT2	79					13	13	13	21.5	21.5	21.5	93.977	65.443	2149300000	41	71	25.9777	25.9423	25.9205	25.8829	25.7968	25.98	25.9581	26.049
	0.481251	-0.192159	A0A087WXZ7;K7EIX2;Q6AI08;K7ELR8	A0A087WXZ7;K7EIX2;Q6AI08;K7ELR8	HEAT repeat-containing protein 6	HEATR6	81					2	2	2	3.5	3.5	3.5	99.666	3.4737	100500000	41	12	23.1068	23.163	22.6275	23.3832	23.2387	23.5152	23.1526	23.1426
	0.454482	-0.150398	Q9NP79;A0A087WY55;Q5TGM0	Q9NP79;A0A087WY55;Q5TGM0	Vacuolar protein sorting-associated protein VTA1 homolog	VTA1	83					6	6	6	21.8	21.8	21.8	33.879	73.89	962090000	12	22	25.14	25.5397	25.6755	25.39	25.8327	25.564	25.3704	25.5797
	0.961098	0.172148	A0A087WY71;E9PFW3;Q96CW1;C9JJ47;C9JTK4;C9JGT8;C9JJD3;C9JPV8;H7C4C3	A0A087WY71;E9PFW3;Q96CW1;C9JJ47;C9JTK4;C9JGT8	AP-2 complex subunit mu	AP2M1	85					8	8	8	21.9	21.9	21.9	49.526	59.067	3705400000	26	78	26.5346	26.684	26.4607	26.3526	26.4058	26.1829	26.4514	26.3033
	0.237071	-0.0489244	P61077;A0A087WY85;D6RAW0;A0A0A0MQU3;H9KV45;D6RAH7;D6RFM0;D6RA11;P62837;D6RIZ3;D6R980;A0A087WW00;D6R933;D6RGD0;C9J9H9;Q9Y2X8;D6R9F6	P61077;A0A087WY85;D6RAW0;A0A0A0MQU3;H9KV45;D6RAH7;D6RFM0;D6RA11;P62837	Ubiquitin-conjugating enzyme E2 D3;Ubiquitin-conjugating enzyme E2 D2	UBE2D3;UBE2D2	86					3	3	2	24.5	24.5	12.2	16.687	18.534	3381200000	4	23	27.703	28.0657	27.7793	27.8744	27.8434	27.9788	27.8785	27.9174
	0.936006	-1.30044	C9JPV1;A0A087WYN0;A0A087WY96;P31641	C9JPV1;A0A087WYN0;A0A087WY96;P31641	Transporter;Sodium- and chloride-dependent taurine transporter	SLC6A6	87					1	1	1	15.6	15.6	15.6	12.063	16.228	772240000	3	22	22.6285	25.7128	24.1319	25.3955	26.0296	25.7495	25.7144	25.5771
	1.29277	-0.415577	A0A140T9S0;A0A0G2JLV0;A0A087WYD6;X5CMH5;E7ENX8;Q03519	A0A140T9S0;A0A0G2JLV0;A0A087WYD6;X5CMH5;E7ENX8;Q03519	Antigen peptide transporter 2	TAP2	88					4	4	4	9.2	9.2	9.2	72.046	38.231	373500000	28	20	23.9367	23.9326	23.3777	24.1519	24.3492	24.1853	24.3271	24.1996
+	2.07931	-1.69432	Q6UXD5;A0A087WYL5;H3BN26	Q6UXD5;A0A087WYL5;H3BN26	Seizure 6-like protein 2	SEZ6L2	90					2	2	2	6.9	6.9	6.9	97.559	5.7487	337970000	27	5	23.0792	23.0512	24.4958	22.5453	24.9772	25.2695	24.6492	25.053
	0.775732	-0.295161	Q7Z478;A0A087WYN9;H0Y8L1	Q7Z478;A0A087WYN9	ATP-dependent RNA helicase DHX29	DHX29	91					14	14	14	15.2	15.2	15.2	155.23	43.116	1350000000	71	58	24.9334	24.8371	24.2893	24.9131	24.8727	24.9401	25.3608	24.98
	0.986696	-2.15928	P09132;A0A087WYR0;A0A087WWU9	P09132;A0A087WYR0	Signal recognition particle 19 kDa protein	SRP19	94					3	3	3	21.5	21.5	21.5	16.156	85.754	1274200000	7	15	23.0232	26.8903	22.6299	26.478	26.6189	27.0012	27.013	27.0254
	1.69109	0.231618	Q15185;A0A087WYT3;B4DDC6	Q15185;A0A087WYT3;B4DDC6	Prostaglandin E synthase 3	PTGES3	95					6	6	6	41.2	41.2	41.2	18.697	208.4	41728000000	9	88	30.4549	30.3203	30.6543	30.5342	30.3061	30.2063	30.2925	30.2324
	1.08079	1.0347	H3BS73;H3BRT2;H3BQ55;H3BNB2;A0A087WYU2;Q96S19;H3BNT3;H3BMF3	H3BS73;H3BRT2;H3BQ55;H3BNB2;A0A087WYU2;Q96S19;H3BNT3;H3BMF3	UPF0585 protein C16orf13	C16orf13	96					3	3	3	38.8	38.8	38.8	11.138	5.1901	177110000	6	6	24.4725	24.3072	22.4841	24.1391	22.3557	23.0724	22.6608	23.1753
	0.17282	-0.186378	A0A087WYV6;A0A087WZU5;O43657	A0A087WYV6;A0A087WZU5;O43657	Tetraspanin-6	TSPAN6	97					3	3	3	25.6	25.6	25.6	14.958	14.473	1005000000	7	29	25.4655	25.4844	23.917	25.5998	25.0167	25.5565	25.4328	25.2062
	0.556299	0.130285	A0A087WZ13;E9PAU2;Q8IY67;K7EKR9;K7EQG2	A0A087WZ13;E9PAU2;Q8IY67	Ribonucleoprotein PTB-binding 1	RAVER1	98					15	15	15	36.3	36.3	36.3	77.843	104.43	2560500000	25	96	25.4903	25.6457	25.4754	25.1469	25.2272	25.3148	25.3735	25.3217
	0.361574	-0.686845	A0A087WZK0;P49366;Q5J8M5;M0R253;M0QX43;A0A3B3IU31;B4E3M2;M0R0V2;M0R0J4;M0QYZ7;M0R1T4;M0R1T2;M0R264	A0A087WZK0;P49366;Q5J8M5;M0R253;M0QX43;A0A3B3IU31;B4E3M2;M0R0V2	Deoxyhypusine synthase	DHPS	102					4	4	4	18.4	18.4	18.4	41.114	25.746	562960000	19	17	24.9745	24.5853	22.9446	24.9809	23.0736	25.779	25.5959	25.7842
	0.908787	-0.172419	A0A087WZK9;B3KS98;O15372;E5RJT0;E5RGU4;E5RFH0;E5RFW7;E5RHC7;E5RH59	A0A087WZK9;B3KS98;O15372;E5RJT0	Eukaryotic translation initiation factor 3 subunit H	EIF3H	103					12	12	12	48.4	48.4	48.4	39.589	79.377	8430300000	20	96	28.4759	28.6907	28.4254	28.5055	28.8625	28.5679	28.793	28.5638
	0.903016	-0.16943	A0A087WZN1;O43837;A0A087X2E5;A0A0D9SG66	A0A087WZN1;O43837;A0A087X2E5	Isocitrate dehydrogenase [NAD] subunit, mitochondrial;Isocitrate dehydrogenase [NAD] subunit beta, mitochondrial	IDH3B	104					18	18	18	56.3	56.3	56.3	42.41	168.43	12413000000	21	182	27.687	27.7775	27.4267	27.4854	27.6271	27.8284	27.8213	27.7774
	0.276949	0.0800991	M0QY61;M0R0X3;A0A087WZT0;M0QZ22;Q5PRF9;M0QXV2;Q9UPU9	M0QY61;M0R0X3;A0A087WZT0;M0QZ22;Q5PRF9;M0QXV2	Protein Smaug homolog 2	SAMD4B	105					4	4	4	27.4	27.4	27.4	24.406	8.9297	239220000	9	15	23.663	23.7558	23.2878	23.5664	23.574	23.3054	23.5804	23.4928
	0.915783	-0.155572	A0A087WZT3;Q9H3K6;H3BV85;H3BTW0;A0A0B4J295;H3BVE0	A0A087WZT3;Q9H3K6	BolA-like protein 2	BOLA2	106					3	3	3	28.9	28.9	28.9	16.932	276.12	8933300000	9	52	28.0151	27.7419	28.0461	27.8201	28.1555	28.0053	28.1157	27.969
	0.286507	-0.574936	J3KPF9;A0A087X011;E9PES4;Q9Y496;C9J9X2	J3KPF9;A0A087X011;E9PES4;Q9Y496	Kinesin-like protein;Kinesin-like protein KIF3A	KIF3A	108					4	4	3	7.1	7.1	5.3	80.354	9.1955	212480000	37	7	22.8434	23.4534	22.6103	25.5748	23.3726	23.3152	25.0359	25.0579
	0.439821	-0.127565	Q9Y3A5;A0A087X020;F8WE72	Q9Y3A5;A0A087X020	Ribosome maturation protein SBDS	SBDS	109					8	8	8	35.2	35.2	35.2	28.763	84.733	2537300000	17	55	25.642	25.8842	26.1154	26.0739	26.037	25.9033	26.2498	26.0357
	0.503534	0.495786	B8ZZ56;A0A087X0D9;E7EV05;E9PFU9;B4DEN4;Q8WV99	B8ZZ56;A0A087X0D9;E7EV05;E9PFU9;B4DEN4;Q8WV99	AN1-type zinc finger protein 2B	ZFAND2B	112					1	1	1	12.4	12.4	12.4	16.233	4.7454	112610000	7	12	23	22.9301	23.2465	22.5389	21.4781	21.9499	23.1199	23.1844
	0.619099	-0.218758	Q5T8P6;A0A087X0H9;E2PSN0	Q5T8P6;A0A087X0H9	RNA-binding protein 26	RBM26	113					8	8	7	9.1	9.1	7.9	113.6	21.816	1028700000	34	47	24.7786	24.9365	24.9907	24.8198	25.4342	25.1597	25.1446	24.6622
	1.0177	-0.10905	A0A087X0K9;Q07157;G3V1L9;A0A7I2V5U5;G5E9E7;A0A0G2JNH2;H0Y3R8;H0YKB1	A0A087X0K9;Q07157;G3V1L9;A0A7I2V5U5;G5E9E7;A0A0G2JNH2	Tight junction protein ZO-1	TJP1	114					50	50	50	45	45	45	197.46	323.31	22112000000	92	450	27.5159	27.5355	27.4229	27.3241	27.5594	27.5149	27.6331	27.5272
	1.06206	-0.114127	A0A087X0L7;J3KNA0;Q15070;E7EVY0;C9JC63	A0A087X0L7;J3KNA0;Q15070;E7EVY0	Mitochondrial inner membrane protein OXA1L	OXA1L	115					7	7	7	16.8	16.8	16.8	48.519	12.69	1696900000	15	48	25.3677	25.413	25.4311	25.3862	25.6233	25.3743	25.5677	25.4892
	1.18027	-0.229439	A0A087X0M4;Q9BWU0;A0A087WWF4;H7C256	A0A087X0M4;Q9BWU0	Kanadaptin	SLC4A1AP	116					7	7	7	13.7	13.7	13.7	82.89	16.98	929220000	41	29	24.9327	24.9049	25.0325	24.6888	25.0269	25.2511	24.9653	25.2334
	0.779841	0.176797	A0A087X0Q1;Q7Z739;A0A024R7W5;A0A087WY31;A0A087X0C3;S4R373	A0A087X0Q1;Q7Z739;A0A024R7W5;A0A087WY31	YTH domain-containing family protein 3	YTHDF3	117					12	12	7	27.6	27.6	18.9	63.674	92.035	3573000000	20	62	27.0084	26.9811	26.9102	27.2494	27.0443	26.914	26.8443	26.6393
	0.0334282	0.00711918	A0A087X0R6;Q9UMY4	A0A087X0R6;Q9UMY4	Sorting nexin-12	SNX12	118					11	11	9	58.7	58.7	54.7	19.825	23.367	5162800000	11	63	27.1615	27.0895	26.932	27.2335	27.1426	27.0076	27.0754	27.1625
	0.32604	0.41562	A0A087X0R7;Q9H4L4;J3QRE4;A0A087WV50;J3QL36	A0A087X0R7;Q9H4L4	Sentrin-specific protease 3	SENP3-EIF4A1;SENP3	119					3	3	3	6.5	6.5	6.5	61.277	3.6493	418960000	19	8	24.8355	24.8415	24.6535	24.7472	24.7651	22.7776	25.2239	24.6486
	0.101663	-0.0248547	A0A087X0W7;A0A087WT95;Q86TX2;P49753;G3V4F2	A0A087X0W7;A0A087WT95;Q86TX2;P49753;G3V4F2	Acyl-coenzyme A thioesterase 1;Acyl-coenzyme A thioesterase 2, mitochondrial	ACOT2;ACOT1	121					18	18	16	53.7	53.7	48.5	46.292	172.58	4834300000	25	125	26.2387	26.3617	26.1568	26.2113	26.4963	26.1416	26.232	26.1981
	0.351724	0.113877	Q8N6M0;A0A087X0W9;A0A0C4DH76	Q8N6M0;A0A087X0W9	OTU domain-containing protein 6B	OTUD6B	122					4	4	4	21.8	21.8	21.8	33.812	23.844	791450000	14	38	25.0796	25.2798	24.7048	25.2348	24.8842	25.0917	24.9777	24.8899
	0.60554	-0.0720739	A0A0G2JN29;A0A087X117;Q15155;A0A0G2JP90;A0A087WW46;A0A7I2V4D7;A0A7I2V686;H3BUC9;A0A7I2V2V8;H3BPS9	A0A0G2JN29;A0A087X117;Q15155;A0A0G2JP90;A0A087WW46;A0A7I2V4D7	Nodal modulator 1	NOMO1	123					24	24	2	26.4	26.4	1.3	139.54	94.375	3743900000	66	137	25.8002	25.575	25.6195	25.7223	25.7715	25.7366	25.8057	25.6915
	0.317341	0.0785055	A0A087X142;A6NMH6;A6NFQ9;F8W8I8;Q92599;C9JV02;C9J4G8;A0A0A0MRP8	A0A087X142;A6NMH6;A6NFQ9;F8W8I8;Q92599	Septin-8	2008-09-01	124					10	7	7	30	22.1	22.1	49.355	65.099	2617700000	19	48	26.4233	26.3643	26.6273	26.3054	26.4628	26.1378	26.4711	26.3345
	0.112449	0.0499029	A0A087X1E4;P53365;E9PRV8;E9PPY7	A0A087X1E4;P53365;E9PRV8	Arfaptin-2	ARFIP2	125					4	4	4	17.6	17.6	17.6	41.595	47.624	908740000	18	41	25.6733	24.9652	25.2299	25.1063	25.1419	25.3682	25.171	25.094
	0.145096	0.353017	A0A087X1W8;A0A0A0MTJ8;X5DQS5;Q9BY67;A0A087X0T8;F5H125;H0YG94	A0A087X1W8;A0A0A0MTJ8;X5DQS5;Q9BY67;A0A087X0T8	Cell adhesion molecule 1	CADM1	126					4	4	4	17.2	17.2	17.2	45.676	55.46	415680000	21	17	24.89	22.4116	24.7411	23.079	22.4296	22.0823	24.2778	24.92
	1.82546	0.233174	H0YM70;A0A087X1Z3;Q9UL46;H0YKU2	H0YM70;A0A087X1Z3;Q9UL46	Proteasome activator complex subunit 2	PSME2	128					10	10	10	50.9	50.9	50.9	26.011	212.57	10997000000	14	131	28.4481	28.4888	28.4969	28.4934	28.354	28.35	28.0647	28.2257
	0.120812	0.10523	Q8TCG1;A0A087X211;F8WAX6	Q8TCG1;A0A087X211	Protein CIP2A	KIAA1524	129					9	9	9	11.8	11.8	11.8	102.18	12.836	804100000	56	32	24.5604	25.5491	25.6187	24.4984	25.0717	24.6463	25.1607	24.9271
	0.000135772	-5.62668e-05	A0A087X256;Q2M389;F8W1W1;F8VYH7	A0A087X256;Q2M389	WASH complex subunit 7	KIAA1033	130					10	10	10	9.5	9.5	9.5	136.5	18.976	9631600000	65	24	30.1153	29.6322	30.1382	30.0827	30.111	29.8371	29.9245	30.0961
+	1.64675	-3.44448	Q9NWB1;A0A6Q8PHA3;F8VZG9;B7Z1U7;A0A6Q8PFM4;J3KNW3;A0A0G2JRA5;A0A804HJM2;A0A087X2B1;A0A6Q8PH77;I3L1D4;B0QYY4;A0A0G2JSB3;B0QYV1;A0A6Q8PGE0;A0A804HKG7;F8VZY7;F8VR27;S4R469;B0QYY7;A0A286YEU2;O43251;J3QRF4;J3QQZ2;A0A3B3ITL7;S4R3K7;A0A0G2JRD1;F8VRS4;A6NFN3;B0QYY6	Q9NWB1;A0A6Q8PHA3;F8VZG9;B7Z1U7;A0A6Q8PFM4;J3KNW3;A0A0G2JRA5;A0A804HJM2;A0A087X2B1;A0A6Q8PH77;I3L1D4;B0QYY4;A0A0G2JSB3;B0QYV1;A0A6Q8PGE0;A0A804HKG7;F8VZY7;F8VR27;S4R469;B0QYY7;A0A286YEU2;O43251;J3QRF4;J3QQZ2;A0A3B3ITL7;S4R3K7;A0A0G2JRD1;F8VRS4;A6NFN3;B0QYY6	RNA binding protein fox-1 homolog 1;RNA binding protein fox-1 homolog;RNA binding protein fox-1 homolog 2;RNA binding protein fox-1 homolog 3	RBFOX1;RBFOX2;RBFOX3	132					2	2	2	6	6	6	42.784	3.7488	830810000	10	6	23.7287	22.0864	23.5485	23.2023	27.7679	23.3838	27.5751	27.6171
	0.0875993	0.166816	A0A087X2D5;Q9BRJ2;A0A0G2JMS5;A0A087WU62	A0A087X2D5;Q9BRJ2;A0A0G2JMS5;A0A087WU62	39S ribosomal protein L45, mitochondrial	MRPL45	133					5	5	5	27.5	27.5	27.5	35.29	7.9737	356860000	20	9	23.3801	24.4704	24.2701	24.3321	24.605	24.3733	22.0268	24.7803
+	2.53001	-0.668288	A0A087X2H1;Q9ULT8;G3V4V5;H0YJP0;A0A087WVU6;H0YJD4	A0A087X2H1;Q9ULT8;G3V4V5;H0YJP0	E3 ubiquitin-protein ligase HECTD1	HECTD1	135					12	12	12	7.1	7.1	7.1	289.63	35.421	1129100000	125	49	23.864	24.188	24.0971	24.3576	25.0667	24.7643	24.6854	24.6635
	1.90449	-0.191976	A0A087X2I1;P62333;H0YJC0;H0YJS8;H0YJX2;H0YJE9;H0YJT1	A0A087X2I1;P62333;H0YJC0	26S protease regulatory subunit 10B	PSMC6	136					16	16	16	55.6	55.6	55.6	45.796	154.2	12733000000	23	236	27.4737	27.5098	27.4766	27.689	27.6777	27.7271	27.7593	27.7528
+	2.54195	-1.49164	A0A096LNH6;Q14185	A0A096LNH6;Q14185	Dedicator of cytokinesis protein 1	DOCK1	139					4	4	4	4	4	4	217.75	3.9924	212000000	103	11	24.0083	23.483	22.9991	22.6004	24.8352	24.7677	24.6319	24.8225
	0.651065	-1.60358	A0A096LNV3;A0A096LP02;Q9Y508	A0A096LNV3;A0A096LP02;Q9Y508	E3 ubiquitin-protein ligase RNF114	RNF114	141					1	1	1	6.9	6.9	6.9	20.885	30.058	430710000	13	10	23.1062	21.0621	23.5827	25.6772	25.7799	25.5263	25.6859	22.8505
	0.60729	-0.142038	P30566;A0A7P0Z472;A0A7P0T9A7;A0A096LNY6;A0A1B0GTJ7;A0A1B0GWJ0;A0A0A6YY92;A0A7P0T8E4;A0A1B0GTG9;A0A096LNY5;A0A1B0GWF8;A0A096LP92;A0A096LNY4;A0A096LP72;B4DEP1;A0A1W2PRX2;A0A096LPA2;A0A096LP76;A0A096LNT0;V9GY96	P30566;A0A7P0Z472;A0A7P0T9A7;A0A096LNY6;A0A1B0GTJ7;A0A1B0GWJ0;A0A0A6YY92;A0A7P0T8E4;A0A1B0GTG9;A0A096LNY5;A0A1B0GWF8;A0A096LP92	Adenylosuccinate lyase	ADSL	142					11	11	11	38.2	38.2	38.2	54.889	131.2	4419400000	25	100	26.5483	26.4178	26.354	26.6084	26.8551	26.56	26.4085	26.673
	0.0896392	0.0416479	A0A0A0MR88;A0A096LPC5;Q9Y4E1;A0A087WYF6;J3KP36;E7ESD2;Q641Q2;F8W7U3;A0A0A0MT65;Q5T1D7;B1AP61	A0A0A0MR88;A0A096LPC5;Q9Y4E1;A0A087WYF6;J3KP36;E7ESD2;Q641Q2;F8W7U3	WASH complex subunit FAM21C;WASH complex subunit FAM21A	FAM21C;FAM21A	145					11	11	11	14.7	14.7	14.7	147.05	45.343	1287600000	64	45	25.4512	25.4623	25.3593	24.8846	25.3823	24.9718	25.4005	25.2364
	0.00471296	0.000807762	A0A096LPI6;P0DPI2;A0A0B4J2D5;A0A096LNH5;H7C2G3;A0A096LNJ1;A0A096LP73;A0A2R8Y6K9;A0A2R8YDR7;F2Z2Q0;A0A096LP12	A0A096LPI6;P0DPI2;A0A0B4J2D5;A0A096LNH5;H7C2G3		C21orf33	146					8	8	2	47	47	16.8	30.376	185	3878700000	18	76	26.795	26.8983	26.8229	26.9151	26.8567	26.7624	26.8154	26.9935
	1.20865	0.790381	A0A096LPK7;A0A182DWF2;D3YTF8;A0A182DWF3;Q9NNW7;A0A096LPD9;E7EWK1;A0A0U1RQX0;A0A096LPH4;A0A096LPB7;A0A096LP96	A0A096LPK7;A0A182DWF2;D3YTF8;A0A182DWF3;Q9NNW7;A0A096LPD9;E7EWK1	Thioredoxin reductase 2, mitochondrial	TXNRD2	147					5	4	4	18.4	15.1	15.1	50.057	12.308	525030000	21	26	25.2391	24.6474	25.3751	25.0331	23.4082	24.7442	24.3135	24.6672
	0.323334	0.0865383	A0A0A0MQR2;Q9BY42;A2A2L5;A2A2L6	A0A0A0MQR2;Q9BY42;A2A2L5	Protein RTF2 homolog	RTFDC1	148					5	5	5	18.5	18.5	18.5	37.531	20.204	1525100000	19	39	25.6714	25.4604	25.3787	25.7343	25.5175	25.5042	25.6171	25.2598
	1.13115	0.242205	A0A0A0MQS1;Q53H96;B5MD87;F8WEI0	A0A0A0MQS1;Q53H96;B5MD87	Pyrroline-5-carboxylate reductase;Pyrroline-5-carboxylate reductase 3	PYCRL	149					8	8	8	36.4	36.4	36.4	29.892	44.832	2468600000	14	76	26.2957	26.1803	26.2051	25.9031	25.8212	25.7603	25.9406	26.0932
	0.622086	0.161824	U3KQC1;A0A0A0MQU0;Q9BV38;K7EIR0;K7EML4	U3KQC1;A0A0A0MQU0;Q9BV38;K7EIR0	WD repeat-containing protein 18	WDR18	150					6	6	6	16.5	16.5	16.5	43.237	13.903	1250100000	20	39	25.4305	25.2246	25.4243	25.6502	25.5254	25.1794	25.2453	25.1323
	0.26465	0.304464	A0A0A0MQU4;Q96I15;H7C3V9;H7C277;C9JNL5	A0A0A0MQU4;Q96I15;H7C3V9;H7C277	Selenocysteine lyase	SCLY	151					3	3	3	13.2	13.2	13.2	48.793	8.1432	226030000	24	4	23.6444	24.3917	23.3354	23.1044	23.9506	22.871	23.9677	22.4688
	0.281733	-0.0692	A0A0A0MQW0;A0A0A0MR39;A0A087WUT0;Q9P2K5;H0YN19;A0A0C4DGV1;H0YKS1;A0A087WWC8	A0A0A0MQW0;A0A0A0MR39;A0A087WUT0;Q9P2K5;H0YN19	Myelin expression factor 2	MYEF2	152					8	8	8	16.5	16.5	16.5	61.957	12.016	858060000	26	28	25.0432	24.8913	25.1368	24.8761	25.2843	25.0454	24.9164	24.9781
	0.586791	0.151256	C9JP00;A0A0A0MQX8;Q9NR56;H7C4T5;Q86VM6;O95205;A0A7P0T9I3;Q5VZF2;C9J4T8;C9JCX1;H7C4Y1;B1AKI6;Q9NUK0	C9JP00;A0A0A0MQX8;Q9NR56;H7C4T5;Q86VM6	Muscleblind-like protein 1	MBNL1	154					7	7	7	27	27	27	37.898	24.809	4205600000	11	81	27.0924	27.1304	26.9109	26.8421	27.0938	26.6714	26.696	26.9095
+	2.22954	-0.610598	F2Z357;A0A0A0MQY8;J3KPC5;X6R8W7;P47736;Q5T3T1	F2Z357;A0A0A0MQY8;J3KPC5;X6R8W7;P47736	Rap1 GTPase-activating protein 1	RAP1GAP	155					5	5	5	13.1	13.1	13.1	66.98	30.967	498740000	28	23	23.7951	24.1618	23.9173	24.1217	24.4608	24.3783	24.6998	24.8994
	0.105935	0.292192	A0A0A0MQZ6;O95478	A0A0A0MQZ6;O95478	Ribosome biogenesis protein NSA2 homolog	NSA2	156					2	2	2	12.2	12.2	12.2	22.653	4.0484	701890000	7	12	25.604	26.225	24.2294	23.6617	22.7522	23.7957	25.6884	26.315
	3.0443	-0.283096	A0A0A0MR02;P45880;Q5JSD2;Q5JSD1;A2A3S1	A0A0A0MR02;P45880;Q5JSD2;Q5JSD1	Voltage-dependent anion-selective channel protein 2	VDAC2	157					13	13	13	64.2	64.2	64.2	30.348	237.6	27358000000	14	152	28.7059	28.647	28.6491	28.8172	29.0151	28.9189	28.9914	29.0261
	0.270628	0.863059	F8WCI3;A0A0A0MRG9;Q96SN8;C9K0C9;F8WF55;B1AMJ5	F8WCI3;A0A0A0MRG9;Q96SN8;C9K0C9;F8WF55;B1AMJ5	CDK5 regulatory subunit-associated protein 2	CDK5RAP2	159					2	2	2	3.5	3.5	3.5	86.512	3.5221	564770000	37	6	26.6539	26.6517	23.6994	23.563	22.2193	26.2407	25.6596	22.9962
	0.091879	-0.0607119	A0A0A0MRH8;A0A0A0MSH9;A0A494C1F7;Q86WJ1;A0A494C179;A0A494C1P7;A0A494C0F0;A0A494C0J6;A0A087WTM4	A0A0A0MRH8;A0A0A0MSH9;A0A494C1F7;Q86WJ1;A0A494C179;A0A494C1P7	Chromodomain-helicase-DNA-binding protein 1-like	CHD1L	161					4	4	4	5.5	5.5	5.5	83.719	6.4877	351380000	33	16	24.1635	24.0826	23.725	23.9506	24.2201	23.5034	24.5366	23.9044
	0.308137	-0.0600939	A0A0A0MRI2;Q9UNH7;G3V5X9;H0YJF8;G3V4Z5;G3V5U2;G3V2U1	A0A0A0MRI2;Q9UNH7	Sorting nexin-6;Sorting nexin-6, N-terminally processed	SNX6	162					11	10	10	28.7	26.3	26.3	47.804	26.244	2675900000	23	84	25.7065	25.6932	25.8208	25.8754	25.992	25.7441	25.6952	25.9051
	0.898109	0.105578	A0A0A0MRJ6;P22061;F6S8N6;A0A3F2YNX8;F8WDT3;F8WAV5;F8WAX2;C9J0F2;H7C4X2	A0A0A0MRJ6;P22061;F6S8N6;A0A3F2YNX8	Protein-L-isoaspartate O-methyltransferase;Protein-L-isoaspartate(D-aspartate) O-methyltransferase	PCMT1	163					12	12	12	50.9	50.9	50.9	30.315	165.22	8750000000	15	110	27.7585	27.805	27.7362	27.6531	27.482	27.6736	27.6902	27.6847
	0.158337	0.0443053	F8W8M4;A0A0A0MRL6;A0A3B3IS55;O14639;J3QSX6;A0A494C1P1;A0A494C1G0;H0Y7N6;F6XFR5	F8W8M4;A0A0A0MRL6;A0A3B3IS55;O14639;J3QSX6;A0A494C1P1;A0A494C1G0	Actin-binding LIM protein 1	ABLIM1	164					9	9	9	19.6	19.6	19.6	81.104	27.199	1018600000	50	32	24.9658	25.3467	25.0713	25.2389	25.0015	25.2193	24.9933	25.2313
	0.976892	-0.12802	A0A0A0MRM9;Q14978;S4R349;S4R402;S4R341;S4R3C2	A0A0A0MRM9;Q14978	Nucleolar and coiled-body phosphoprotein 1	NOLC1	166					9	9	9	14	14	14	74.543	60.738	7038800000	33	69	27.8374	27.6523	27.6913	27.8771	27.9428	27.9454	27.9028	27.7793
	1.10507	-0.229253	A0A0A0MRR7;P09234	A0A0A0MRR7;P09234	U1 small nuclear ribonucleoprotein C	SNRPC	168					2	2	2	16.7	16.7	16.7	19.687	55.902	4305900000	8	33	27.7473	27.6683	27.7208	27.4801	28.0502	28.0059	27.6604	27.8171
	0.148004	-0.300843	B6VEX4;A0A0A0MRT6;Q8IZP0	B6VEX4;A0A0A0MRT6;Q8IZP0	Abl interactor 1	ABI1	169					6	6	4	20.9	20.9	14.2	43.294	12.968	713420000	18	24	22.4493	25.5825	25.4403	25.4226	25.4478	25.0579	24.8557	24.7368
+	3.25243	-1.42547	A0A7I2YQR3;A0A0A0MRU9;E7ETY4;E9PC69;Q7KZI7;A0A7I2V3R3;F5H4J8;F5H6N2;A0A7I2YQF3;F5H4F6	A0A7I2YQR3;A0A0A0MRU9;E7ETY4;E9PC69;Q7KZI7;A0A7I2V3R3	Serine/threonine-protein kinase MARK2	MARK2	170					4	4	4	9.3	9.3	9.3	80.575	15.759	328320000	39	14	22.971	22.8582	23.0724	23.6837	24.4785	24.341	24.6131	24.8546
	0.213067	0.113322	A0A5K1VW64;C9J8U3;A0A0A0MRW7;Q7Z2E3	A0A5K1VW64;C9J8U3;A0A0A0MRW7;Q7Z2E3	Aprataxin	APTX	172					2	2	2	8.1	8.1	8.1	31.265	4.3313	279160000	13	16	23.8082	23.8077	23.6124	24.3542	24.1151	23.9096	23.5312	23.5733
	2.25395	-0.294891	A0A0A0MRX2;Q96HY6	A0A0A0MRX2;Q96HY6	DDRGK domain-containing protein 1	DDRGK1	173					3	3	3	15.4	15.4	15.4	33.939	53.515	1148400000	12	40	25.1937	25.1249	25.4129	25.324	25.4792	25.5751	25.5912	25.5896
+	4.31591	1.01567	A0A0A0MS51;A0A0A0MT01;P06396;A0A0U1RQL8	A0A0A0MS51;A0A0A0MT01;P06396	Gelsolin	GSN	175					15	15	4	26.5	26.5	8.4	82.525	97.804	5958000000	33	116	27.5535	27.5603	27.7017	27.5364	26.3688	26.7757	26.4833	26.6614
	0.87096	-0.527553	A0A0A0MSA7;A0A804HJV5;A0A0U1RQK7;O43432;A0A7P0TBQ8	A0A0A0MSA7;A0A804HJV5;A0A0U1RQK7;O43432	Eukaryotic translation initiation factor 4 gamma 3	EIF4G3	178					7	2	2	4.4	1.4	1.4	180.5	5.1141	165410000	86	16	23.1096	22.286	23.4839	23.3982	23.3822	23.8454	23.8189	23.3415
	0.754394	0.300205	A0A0A0MSA9;A0A0C4DG49;P15151	A0A0A0MSA9;A0A0C4DG49;P15151	Poliovirus receptor	PVR	179					4	4	4	12.5	12.5	12.5	42.882	20.976	1322700000	13	33	26.6462	26.2135	26.7371	26.6424	25.8388	26.5956	26.2834	26.3205
	0.00553415	-0.00193787	A0A0A0MSB8;Q9UPT5;A0A0A0MRE1;B4DJ07;B5MCY9;K7ERQ5;C9JME6;C9JKC2	A0A0A0MSB8;Q9UPT5;A0A0A0MRE1;B4DJ07	Exocyst complex component 7	EXOC7	180					13	13	13	26.7	26.7	26.7	78.808	87.283	2343700000	36	90	25.2821	25.6201	25.4044	25.6137	25.2393	25.5225	25.5579	25.6084
	0.0795975	0.0986409	B5MCU4;A0A0A0MSH6;B5MDU6;Q9H6V9;C9JHU6;C9JUM0	B5MCU4;A0A0A0MSH6;B5MDU6;Q9H6V9;C9JHU6;C9JUM0	UPF0554 protein C2orf43	LDAH;C2orf43	181					2	2	2	13.8	13.8	13.8	28.012	2.4339	83326000	14	8	24.1287	23.2461	22.6496	23.2527	23.2436	23.3751	22.3444	23.9194
	1.3264	0.151841	O00471;A0A0A0MSI8;F8W9B8	O00471;A0A0A0MSI8;F8W9B8	Exocyst complex component 5	EXOC5	183					8	8	8	14.3	14.3	14.3	81.852	14.155	563560000	41	19	24.7693	24.8134	24.7781	24.7758	24.8088	24.538	24.5875	24.5949
+	3.44876	-0.367344	A0A0A0MSK5;Q5JTV8;J3KN66;H0Y4R4;H0YD16;H0YDU3	A0A0A0MSK5;Q5JTV8;J3KN66;H0Y4R4	Torsin-1A-interacting protein 1	TOR1AIP1	184					14	13	13	42.4	40.3	40.3	52.406	76.251	3599100000	27	74	26.0977	26.1004	25.9698	25.8999	26.3848	26.3543	26.4104	26.3878
	0.285901	0.372889	Q13017;A0A0A0MSK6;G3V444	Q13017;A0A0A0MSK6	Rho GTPase-activating protein 5	ARHGAP5	185					5	5	5	4.5	4.5	4.5	172.46	8.6519	266300000	74	7	23.8607	22.8805	24.4341	24.2561	23.6048	23.3238	24.5176	22.4937
	0.521691	-0.062171	A0A0A0MSS8;P42330;S4R3Z2;S4R3D5;P17516	A0A0A0MSS8;P42330;S4R3Z2	Aldo-keto reductase family 1 member C3	AKR1C3	186					26	26	16	75.9	75.9	53.9	36.867	323.31	525330000000	20	895	33.2105	33.2725	33.3201	33.201	33.3565	33.3151	33.1813	33.3999
	0.279918	-0.0988526	C9JRP1;A0A0A0MST8;E9PFN4;Q9Y6M7	C9JRP1;A0A0A0MST8;E9PFN4;Q9Y6M7	Anion exchange protein;Sodium bicarbonate cotransporter 3	SLC4A7	187					5	5	1	6.1	6.1	1.7	118.46	13.688	396850000	50	33	23.5132	23.8172	23.7059	23.9735	23.6371	23.8222	23.7877	24.1582
	1.26086	0.24535	A0A0G2JKZ1;A2AB90;A0A0G2JH37;A0A0A0MSV9;O15533;Q6P1N7;C9JA35;A0A0A0MT98	A0A0G2JKZ1;A2AB90;A0A0G2JH37;A0A0A0MSV9;O15533;Q6P1N7;C9JA35	Tapasin	TAPBP	188					4	4	4	15	15	15	47.606	9.2229	732980000	14	36	24.7915	24.7183	24.9556	24.6688	24.6514	24.3115	24.5247	24.6653
	0.0970411	-0.0550442	A0A0A0MSW4;P48739;B3KYB6;B3KYB7	A0A0A0MSW4;P48739;B3KYB6;B3KYB7	Phosphatidylinositol transfer protein beta isoform	PITPNB	189					10	8	8	45	38.7	38.7	31.581	32.106	1661100000	18	53	25.5231	26.176	25.2291	25.5193	25.6432	25.5279	25.7859	25.7107
	1.27276	-0.263389	A0A0A0MT33;Q9UPN6	A0A0A0MT33;Q9UPN6	Protein SCAF8	SCAF8	190					7	7	5	7.9	7.9	6.5	148.86	11.372	730980000	43	35	24.6342	24.8094	24.5443	24.5461	24.8488	25.1569	24.7374	24.8444
	2.29755	-0.447875	A0A0A0MTB8;Q8NI36	A0A0A0MTB8;Q8NI36	WD repeat-containing protein 36	WDR36	192					7	7	7	10.3	10.3	10.3	99.365	20.246	923180000	40	27	24.8961	24.6847	24.5142	24.8798	25.3026	25.2352	25.0615	25.167
	2.90629	-0.257878	A0A0A0MTR7;A0A0A0MTC1;Q63HN8;I3L3H9	A0A0A0MTR7;A0A0A0MTC1;Q63HN8	E3 ubiquitin-protein ligase RNF213	RNF213	193					54	54	54	13.9	13.9	13.9	591.4	201.39	6172800000	274	292	25.3729	25.4385	25.4183	25.4049	25.7842	25.6769	25.603	25.6021
	0.19024	-0.0410099	Q13418;A0A0A0MTH3;A0A087WWY6	Q13418;A0A0A0MTH3	Integrin-linked protein kinase	ILK	195					14	14	14	37.6	37.6	37.6	51.419	86.192	3929100000	24	118	26.0534	26.2509	26.2446	26.2795	26.2289	26.0736	26.3911	26.2989
	0.701213	-0.151326	A0A0A0MTI5;B8ZWD1;P07108	A0A0A0MTI5;B8ZWD1;P07108	Acyl-CoA-binding protein	DBI	198					4	4	4	32.2	32.2	32.2	15.958	226.3	31622000000	8	125	30.2083	30.2833	30.0453	30.0562	30.5324	30.1337	30.3253	30.207
	0.65634	0.137613	A0A0A0MTJ9;Q6PIU2;H7C046;F8WE33	A0A0A0MTJ9;Q6PIU2;H7C046	Neutral cholesterol ester hydrolase 1	NCEH1	200					9	9	9	24.3	24.3	24.3	49.881	32.602	2131500000	21	73	25.5385	25.9424	25.7786	25.9559	25.6879	25.6564	25.7218	25.5988
	0.820519	-1.699	Q5T2B5;A0A0A0MTN0;Q13617	Q5T2B5;A0A0A0MTN0;Q13617	Cullin-2	CUL2	201					5	5	5	7.2	7.2	7.2	82.358	5.0792	447700000	39	9	23.066	22.1351	22.3191	25.7996	25.7755	25.576	25.4996	23.2648
	0.117106	-0.640005	Q8WZ42;A0A0A0MTS7;A0A0A0MRA3	Q8WZ42;A0A0A0MTS7;A0A0A0MRA3	Titin	TTN	203					8	8	8	0.3	0.3	0.3	3816	4.1571	4235000000	1856	16	27.5439	23.1771	28.9285	22.675	22.316	27.5419	27.4217	27.6049
	0.793387	-0.236336	Q9Y3B3;A0A0A6YYA0;G3V2Y2	Q9Y3B3;A0A0A6YYA0	Transmembrane emp24 domain-containing protein 7	TMED7;TMED7-TICAM2	204					5	5	5	33	33	33	25.171	22.777	2342600000	12	43	26.5351	26.353	26.2337	26.4212	26.2307	26.8342	26.7178	26.7057
	1.4448	-1.08598	A0A0A6YYC7;Q96JP5;H3BTR0;H0YCH4;Q9BU19	A0A0A6YYC7;Q96JP5;H3BTR0	E3 ubiquitin-protein ligase ZFP91	ZFP91-CNTF;ZFP91	205					4	4	4	13	13	13	59.57	18.486	390590000	24	15	22.7509	23.6785	24.385	22.7808	24.3323	24.3402	24.56	24.7065
	0.362629	-0.152104	Q4V339;Q5JTY5;Q5RIA9;Q8IUF1;Q9BRT8;A0A0A6YYH9;A0A0B4J2F1;F2Z2T4;A0A0A0MRU4;Q5RIB0;H0Y5V3;C9J3G2;A0A087X140;A0A087WWG3;Q5RIB5;F8WEU0;A0A0B4J1T6;A0A087WYD2;E7EUZ7;F8WEG4;A0A087WZQ3;A0A0B4J2E3;H0Y857;Q5RIB3;A0A087WTC0;Q5JTY2;A0A087X1C0;Q6NVZ8	Q4V339;Q5JTY5;Q5RIA9;Q8IUF1;Q9BRT8;A0A0A6YYH9;A0A0B4J2F1;F2Z2T4;A0A0A0MRU4;Q5RIB0;H0Y5V3;C9J3G2;A0A087X140;A0A087WWG3;Q5RIB5;F8WEU0;A0A0B4J1T6;A0A087WYD2;E7EUZ7;F8WEG4;A0A087WZQ3;A0A0B4J2E3;H0Y857;Q5RIB3;A0A087WTC0;Q5JTY2;A0A087X1C0;Q6NVZ8	COBW domain-containing protein 6;COBW domain-containing protein 3;COBW domain-containing protein 5;COBW domain-containing protein 2;COBW domain-containing protein 1	CBWD6;CBWD3;CBWD5;CBWD2;CBWD1;CBWD7	207					2	2	2	9.1	9.1	9.1	43.963	6.9865	178790000	17	8	23.6929	23.9123	23.3599	23.3276	23.3969	23.9371	23.793	23.7741
	0.839341	-0.93045	A8MV53;A0A0A6YYI3;A0A0B4J1V8;Q9NQ55;H7C446;C9J3W3	A8MV53;A0A0A6YYI3;A0A0B4J1V8;Q9NQ55;H7C446;C9J3W3	Suppressor of SWI4 1 homolog	PPAN;PPAN-P2RY11	208					2	2	2	10.5	10.5	10.5	47.144	8.215	131580000	19	5	22.9919	22.4544	23.4748	24.0419	24.3869	24.7126	24.7135	22.8719
	1.59471	-0.17418	A0A0A6YYJ8;Q96HJ9	A0A0A6YYJ8		LUC7L2	209					16	16	1	32.8	32.8	2.4	54.223	149.91	12628000000	20	172	27.9564	27.9643	28.0217	27.8917	28.0044	28.2085	28.2282	28.0897
	0.162743	0.233885	A0A0A6YYL1;A0A0U1RQM3;P49914;H3BMB9;A0A0U1RR23	A0A0A6YYL1;A0A0U1RQM3;P49914;H3BMB9	5-formyltetrahydrofolate cyclo-ligase	ST20-MTHFS;MTHFS	212					3	3	3	19	19	19	20.519	9.1173	409700000	11	12	24.2168	22.8761	24.5699	24.3752	23.3008	22.9007	24.4158	24.4853
+	3.68527	0.548673	A0A0A6YYL2;P0DMN0;P0DMM9;H3BPL6;H3BNY7;A0A7I2V2T5;H3BRT0;E9PKW4	A0A0A6YYL2;P0DMN0;P0DMM9;H3BPL6	Sulfotransferase;Sulfotransferase 1A4;Sulfotransferase 1A3	SULT1A4;SULT1A3	213					10	10	6	49.8	49.8	34.2	34.779	68.245	6406100000	19	86	27.1761	27.0806	26.8891	27.068	26.4069	26.557	26.5416	26.5137
	0.661889	0.138837	A0A0A6YYL4;P57737;I3L0X9;I3L3T0;Q9Y3D7;I3L1U7;I3L442;I3L212;E7EP81;I3L167	A0A0A6YYL4;P57737	Coronin;Coronin-7	CORO7-PAM16;CORO7	214					8	8	8	12.4	12.4	12.4	114.16	81.092	1079600000	40	41	25.4675	25.324	25.7492	25.4945	25.4095	25.2984	25.4886	25.2834
	1.08053	-0.160184	A0A0B4J1W3;Q9BXJ9	A0A0B4J1W3;Q9BXJ9	N-alpha-acetyltransferase 15, NatA auxiliary subunit	NAA15	215					28	28	24	37.2	37.2	32.9	101.2	106.42	6929600000	52	173	26.9272	26.9472	27.115	27.0331	27.0017	27.1588	27.1899	27.3126
	0.190194	-0.042623	A0A0B4J1Z1;C9JAB2;Q16629;F8WEA1	A0A0B4J1Z1;C9JAB2;Q16629	Serine/arginine-rich splicing factor 7	SRSF7	216					8	8	7	51.1	51.1	51.1	15.763	76.418	16414000000	8	92	28.8699	28.8395	29.1694	28.8494	29.0547	28.9967	28.8724	28.9749
	0.543248	-1.14991	D6RAG0;E7EP90;A0A0B4J2F8;A0A0B4J1Z8;F6S314;E2QRJ6;E7EWC6;H0Y980;P52435;A6NFM0;Q9H1A7;Q9GZM3	D6RAG0;E7EP90;A0A0B4J2F8;A0A0B4J1Z8;F6S314;E2QRJ6;E7EWC6;H0Y980;P52435;A6NFM0;Q9H1A7;Q9GZM3	DNA-directed RNA polymerase II subunit RPB11-a;DNA-directed RNA polymerase II subunit RPB11-b2;DNA-directed RNA polymerase II subunit RPB11-b1	POLR2J3;POLR2J;POLR2J2	217					2	2	2	28.8	28.8	28.8	7.9742	4.2684	509330000	5	6	23.3066	25.7538	23.0843	23.9265	25.8467	26.0683	22.8504	25.9055
	1.24849	-0.335745	A0A0B4J287;Q9H0A8;H3BM91;H3BPG2;H3BQF2	A0A0B4J287;Q9H0A8;H3BM91;H3BPG2	COMM domain-containing protein 4	COMMD4	219					5	5	5	40.1	40.1	40.1	19.382	174.66	1070600000	10	41	24.9103	25.2107	24.5532	24.9596	25.1929	25.165	25.3626	25.2562
	0.237793	-0.254472	A0A0B4J2A0;Q9UHJ6	A0A0B4J2A0;Q9UHJ6	Sedoheptulokinase	TRPV1;SHPK	221					5	5	5	17.2	17.2	17.2	51.504	16.691	681140000	21	21	23.5575	25.0531	25.544	24.7481	25.217	24.759	25.0236	24.9208
	0.290667	-0.132434	K7EM56;A0A0B4J2B4;S4R417;K7ELC2;P62841;K7EQJ5;S4R456;K7EJ78	K7EM56;A0A0B4J2B4;S4R417;K7ELC2;P62841;K7EQJ5	40S ribosomal protein S15	RPS15	222					5	5	5	63.4	63.4	63.4	12.99	125.13	18183000000	6	148	28.774	28.9493	28.9472	29.0222	29.6031	28.8541	28.8902	28.875
	0.37873	-0.94251	A0A0B4J2C2;Q9Y2H0;F8WF49;A0A087WWE6;A0A087X246	A0A0B4J2C2;Q9Y2H0;F8WF49	Disks large-associated protein 4	DLGAP4	223					3	3	3	16.8	16.8	16.8	31.662	7.1029	608730000	14	14	23.193	22.5486	22.8108	23.9193	26.026	25.6775	22.0013	22.5369
	0.517824	0.137297	Q5W0H4;A0A0B4J2C3;P13693;J3KPG2;E9PJF7;H0YCX0;Q56UQ5	Q5W0H4;A0A0B4J2C3;P13693;J3KPG2;E9PJF7	Translationally-controlled tumor protein	TPT1	224					8	8	8	36.2	36.2	36.2	21.525	134.04	26381000000	7	164	29.3577	29.5292	29.4933	29.2888	29.0162	29.2427	29.5402	29.3207
	0.566591	-0.898067	A0A0B4J2E5;Q15269	A0A0B4J2E5;Q15269	Periodic tryptophan protein 2 homolog	PWP2	225					3	2	2	5.1	3.7	3.7	102.45	25.094	655140000	39	14	25.6903	22.5391	25.1533	25.3941	25.557	25.5788	25.9738	25.2594
	0.0254639	0.0169463	G3V267;G3V5T0;A0A0C4DFM0;G3V4T6;O43708;G3V3B9;A0A0A0MR33;H0YJN8	G3V267;G3V5T0;A0A0C4DFM0;G3V4T6;O43708;G3V3B9;A0A0A0MR33	Maleylacetoacetate isomerase	GSTZ1	227					3	3	3	25.4	25.4	25.4	21.074	18.585	615270000	8	27	25.1196	24.7675	24.2528	24.6757	25.0121	24.6696	24.7415	24.3247
+	1.55894	-1.33294	A0A0C4DFM1;Q92544	A0A0C4DFM1;Q92544	Transmembrane 9 superfamily member 4	TM9SF4	228					6	6	6	12.5	12.5	12.5	72.54	37.849	717520000	22	34	24.8671	22.9967	23.7054	24.7515	25.4633	25.0745	25.5043	25.6104
	0.989572	0.414098	A0A0C4DFM2;Q6ZN55	A0A0C4DFM2;Q6ZN55	Zinc finger protein 574	ZNF574	229					2	2	2	2.5	2.5	2.5	108.7	2.5654	97602000	37	11	23.3395	22.4432	23.1837	23.2309	22.6021	22.7563	22.4638	22.7189
+	3.02669	0.871008	A0A0C4DFN3;Q99685;A0A3B3ITT3;H7C599;E7EWX8;H7C4E0;C9J8Q3;H7C5K5;C9JAM4	A0A0C4DFN3;Q99685;A0A3B3ITT3;H7C599;E7EWX8;H7C4E0	Monoglyceride lipase	MGLL	230					10	10	10	48.9	48.9	48.9	34.292	40.794	2839600000	16	69	26.3425	26.7272	26.5369	26.3168	25.2855	25.7025	25.7241	25.7272
	0.712537	0.136024	A0A590UJ18;A0A590UJS9;C9JUA9;A0A590UJ68;A0A590UJ08;A0A590UJR5;A0A590UJC5;Q12959;A0A590UKA8;A0A0C4DFT3;A0A590UJD9;A0A590UJ29;A0A590UK81;A0A590UJ81;A0A590UJR4;A0A590UJX2;A0A590UK48;E7EQD7;A0A590UJ64;E9PN83;A0A590UK02;F8VYC1;H7C325;C9JCP6;A8MUT6;B7Z2T4;A0A3B3ISW2;B4E2H8;A0A590UJ95;B5MCC5;Q15700;A0A3B3ITF1;A0A590UJL2;E9PIW2;Q5JUW8;F2Z2L0;C9J110;B9EGL1;A0A3B3ISQ5;C9IYP1;A0A590UK13;A0A590UJ86;F8W750;C9…	A0A590UJ18;A0A590UJS9;C9JUA9;A0A590UJ68;A0A590UJ08;A0A590UJR5;A0A590UJC5;Q12959;A0A590UKA8;A0A0C4DFT3;A0A590UJD9;A0A590UJ29;A0A590UK81;A0A590UJ81;A0A590UJR4;A0A590UJX2;A0A590UK48;E7EQD7;A0A590UJ64	Disks large homolog 1	DLG1	231					6	6	6	10.5	10.5	10.5	96.618	14.362	606800000	38	17	24.9816	25.2515	24.9968	24.9965	24.8128	25.1139	24.8655	24.8901
	1.3739	-0.65881	A0A0C4DFX9;Q9H3P2;C9JHL4;H0Y3X6;H7C0W2;C9JEM7;H7C2C7;H7C3C2;F8W954;F8WF98;H7C2M8	A0A0C4DFX9;Q9H3P2;C9JHL4;H0Y3X6;H7C0W2;C9JEM7;H7C2C7	Negative elongation factor A	NELFA	232					4	4	4	8	8	8	58.499	4.5218	282430000	22	11	23.5917	24.101	23.8864	22.9786	24.1972	24.171	24.5184	24.3064
	0.13745	0.0263896	O60934;A0A0C4DG07;A0A087X1V5	O60934;A0A0C4DG07	Nibrin	NBN	233					7	7	7	11.9	11.9	11.9	84.958	11.744	409400000	42	21	23.8309	23.6891	23.8532	23.773	23.9083	23.6025	23.7523	23.7777
	1.14563	-0.102095	C9J9K3;A0A0C4DG17;P08865;F8WD59	C9J9K3;A0A0C4DG17;P08865	40S ribosomal protein SA	RPSA	234					15	15	15	66.2	66.2	66.2	29.404	323.31	74262000000	13	280	30.2299	30.36	30.346	30.2992	30.5052	30.328	30.4074	30.4029
	0.369741	0.299671	H7BZH3;A0A0C4DG33;O43933	H7BZH3;A0A0C4DG33;O43933	Peroxisome biogenesis factor 1	PEX1	236					2	2	2	10.7	10.7	10.7	22.535	2.0219	50903000	11	2	23.4184	22.6136	23.3653	21.9998	22.4776	22.3429	22.5665	22.8114
+	2.38849	-1.13941	A0A0C4DG44;O43464	A0A0C4DG44;O43464	Serine protease HTRA2, mitochondrial	HTRA2	237					3	3	3	18.4	18.4	18.4	45.112	15.09	204560000	21	8	23.2101	22.7933	23.0321	23.6579	23.9447	24.2683	24.2499	24.7883
	0.204342	-0.428808	F5GYV5;H7BZV4;A0A0C4DG62;F8WCT1;A0A8C8KBE9;Q66PJ3;F8WEP2;A0A0C4DH18	F5GYV5;H7BZV4;A0A0C4DG62;F8WCT1;A0A8C8KBE9;Q66PJ3	ADP-ribosylation factor-like protein 6-interacting protein 4	ARL6IP4	238					3	3	3	22.3	22.3	22.3	23.687	31.365	492060000	8	16	25.0441	22.9108	23.2196	25.2168	22.8045	24.981	25.1861	25.1351
	2.99272	-0.271305	A0A0C4DG89;Q7L014;D6RJA6;H0Y9U3	A0A0C4DG89;Q7L014	Probable ATP-dependent RNA helicase DDX46	DDX46	240					28	28	28	33.4	33.4	33.4	117.46	220.88	6817300000	53	169	26.189	26.1417	26.1422	26.3082	26.4043	26.4727	26.5178	26.4716
	1.41485	0.308568	A0A0C4DGA2;O75521;F1LLU7;F8WAW4;C9JB63;F8W6J1	A0A0C4DGA2;O75521;F1LLU7	Enoyl-CoA delta isomerase 2, mitochondrial	ECI2	242					8	8	8	32.1	32.1	32.1	40.183	32.497	969880000	17	29	24.8586	25.1911	25.1807	24.8525	24.6128	24.8383	24.5795	24.818
	0.288311	-0.110361	Q14527;A0A0C4DGA6;H7C5K0	Q14527;A0A0C4DGA6	Helicase-like transcription factor	HLTF	243					9	9	9	12.5	12.5	12.5	113.93	47.822	977560000	55	53	24.7994	24.7161	24.4718	24.1963	24.4059	24.718	24.7563	24.7449
	1.63649	-0.825902	A0A0C4DGB0;Q9UIL1	A0A0C4DGB0;Q9UIL1	Short coiled-coil protein	SCOC	244					1	1	1	22	22	22	9.3544	28.681	303390000	3	17	23.4328	23.451	23.3393	24.4812	24.5481	24.4131	24.4564	24.5904
	0.296169	0.249444	A0A0C4DGF8;A0A1B0GU48;A0A1B0GV09;Q9H9B1;A0A0D9SF38;A0A1B0GWF6;A0A1W2PPZ7	A0A0C4DGF8;A0A1B0GU48;A0A1B0GV09;Q9H9B1;A0A0D9SF38;A0A1B0GWF6;A0A1W2PPZ7	Histone-lysine N-methyltransferase EHMT1	EHMT1	245					2	2	2	3.9	3.9	3.9	88.239	4.3426	124370000	34	10	24.0663	22.9471	22.8526	23.8433	22.8518	23.5398	23.3947	22.9251
	1.61441	-0.180742	A0A2U3TZM0;A0A2R8Y5J0;Q14839;A0A0C4DGG9;A0A2R8Y521;A0A2R8Y212;F5GWX5;A0A2R8YFD8;A0A2R8Y425;A0A2R8YFK9;A0A2R8YDJ9;A0A2R8YD40;A0A2R8Y4X2;A0A2R8YDW2;A0A2R8Y8C1;A0A2R8YER1;A0A2R8Y445;A0A2R8Y5Z7;A0A2R8Y685;A0A2R8Y7I0;A0A2R8Y8B3;A0A2R8Y7M9;A0A2R8Y5M9;Q8TDI0;A0A2R8YE38;K7EMY3;F2Z2R5;F5H6N4;A0A2R8Y6G9;A0A2R8Y7X1;H7C2H0;K7ESA5;K7EPV1	A0A2U3TZM0;A0A2R8Y5J0;Q14839;A0A0C4DGG9;A0A2R8Y521;A0A2R8Y212;F5GWX5;A0A2R8YFD8;A0A2R8Y425;A0A2R8YFK9;A0A2R8YDJ9;A0A2R8YD40;A0A2R8Y4X2;A0A2R8YDW2;A0A2R8Y8C1;A0A2R8YER1;A0A2R8Y445;A0A2R8Y5Z7;A0A2R8Y685	Chromodomain-helicase-DNA-binding protein 4	CHD4	246					32	32	28	21.2	21.2	19.4	216.88	130.75	6598700000	90	207	26.287	26.2647	26.1031	26.3263	26.38	26.3909	26.4023	26.5309
	2.00072	0.124813	A0A0C4DGQ5;P04632;K7ELJ7;A0A075B7C0;U3KQE2;K7EIV0;K7EKD8;K7EM73;U3KPR7;Q96L46;K7ES78;K7EMQ1	A0A0C4DGQ5;P04632;K7ELJ7;A0A075B7C0;U3KQE2;K7EIV0;K7EKD8;K7EM73	Calpain small subunit 1	CAPNS1	249					12	12	12	64.3	64.3	64.3	33.786	323.31	20311000000	12	212	28.177	28.2187	28.1179	28.1067	27.979	28.0601	28.0128	28.0692
	0.765847	-0.20789	P39656;A0A0C4DGS1;U3KQ84	P39656;A0A0C4DGS1;U3KQ84	Dolichyl-diphosphooligosaccharide--protein glycosyltransferase 48 kDa subunit	DDOST	251					12	12	12	39.9	39.9	39.9	50.8	181.98	12711000000	23	117	28.9437	28.721	28.5084	29.1132	29.0443	29.07	28.9597	29.0437
	0.528134	-0.134317	A0A0C4DH01;Q9NVU0;H3BM46;H3BRY1;H3BMR4	A0A0C4DH01;Q9NVU0;H3BM46;H3BRY1;H3BMR4	DNA-directed RNA polymerase III subunit RPC5	POLR3E	253					2	2	2	3.6	3.6	3.6	75.773	4.4844	107790000	39	10	23.1592	23.0496	22.9368	23.2999	23.2103	23.167	23.5022	23.1034
	0.242432	0.0429029	A0A0C4DH22;A0A1B0GTW6;Q9H4G0;Q4VXN0;Q4VXN5;X6RC15;Q4VXN6;Q4VXN1;Q4VXN7;H0Y482;Q4VXN2;Q4VXN8	A0A0C4DH22;A0A1B0GTW6;Q9H4G0	Band 4.1-like protein 1	EPB41L1	254					25	25	17	41.9	41.9	29.5	98.374	220.03	9617100000	47	208	27.015	26.8975	26.8551	26.9801	26.9446	26.9902	26.7131	26.9282
	0.111216	-0.0531898	Q5QPR4;A0A0D9SEI3;Q5QPR3;A0A0D9SER5;A0A0D9SEN2;Q9UQ88;P21127;J3KS35;E7ESP2;E9PFJ2;A0A087WYI9;A0A087X1I0	Q5QPR4;A0A0D9SEI3;Q5QPR3;A0A0D9SER5;A0A0D9SEN2;Q9UQ88;P21127	Cyclin-dependent kinase 11A;Cyclin-dependent kinase 11B	CDK11A;CDK11B	255					12	12	12	18.9	18.9	18.9	86.823	18.257	1645800000	40	33	25.7806	26.2034	25.5929	25.6623	25.9214	25.5357	26.0484	25.9464
	0.436168	0.333743	H0YM62;D6R942;A0A0D9SGI5;A0A1B0GV32;A0A0R4J2G5;A0A0D9SFD0;D6RJG6;D8L7E9;D6RG14;D6RC63;A0A0D9SET2;D6RJA7;Q05BX2;D6RCM6;D6RG21;A0A1B0GTW4;D6RB91;Q06413;Q02078;Q14814	H0YM62;D6R942;A0A0D9SGI5;A0A1B0GV32;A0A0R4J2G5;A0A0D9SFD0;D6RJG6;D8L7E9;D6RG14;D6RC63;A0A0D9SET2;D6RJA7;Q05BX2;D6RCM6;D6RG21;A0A1B0GTW4;D6RB91;Q06413;Q02078;Q14814	Myocyte-specific enhancer factor 2C;Myocyte-specific enhancer factor 2A;Myocyte-specific enhancer factor 2D	MEF2A;MEF2C;MEF2D	257					1	1	1	12.9	12.9	12.9	10.058	3.4093	91102000	3	10	23.012	22.657	22.9036	24.047	22.4495	22.723	22.97	23.1422
	0.296252	-0.163513	C9J840;E7EX83;A0A0D9SG62;H7C0P6;E7ENQ1;G3XAA2;H7C360;G5E948;E7EN19;A0A0D9SEY1;O95819;H7C3Z6	C9J840;E7EX83;A0A0D9SG62;H7C0P6;E7ENQ1;G3XAA2;H7C360;G5E948;E7EN19;A0A0D9SEY1;O95819	Mitogen-activated protein kinase kinase kinase kinase 4	MAP4K4	258					5	5	5	8.2	8.2	8.2	113.56	10.323	566710000	42	41	24.1808	24.9786	24.4673	24.444	25.0338	24.4408	24.8679	24.3824
	2.15069	-0.1737	O00571;A0A0D9SG12;A0A0D9SF53;A0A2R8YF78;A0A0D9SFB3;A0A2R8YFS5;A0A2R8Y4A4;A0A2R8YFR4;A0A2R8YCW1;A0A2U3TZJ9;A0A2R8Y645;A0A2R8Y5G6;F6S8Q4;A0A2R8YDT5;A0A2R8Y7T2;A0A2R8YDH3;O15523;A0A0J9YVQ7;A0A087WVZ1;A0A2R8Y650;A0A2R8YCU0;C9J081;C9J8G5;A0A2R8YF89;A0A087WX09;A0A2R8Y770;A0A2R8Y4D2;D6RCM4;Q9NQI0;H0Y960	O00571;A0A0D9SG12;A0A0D9SF53;A0A2R8YF78;A0A0D9SFB3;A0A2R8YFS5;A0A2R8Y4A4;A0A2R8YFR4;A0A2R8YCW1;A0A2U3TZJ9;A0A2R8Y645;A0A2R8Y5G6;F6S8Q4;A0A2R8YDT5;A0A2R8Y7T2;A0A2R8YDH3;O15523	ATP-dependent RNA helicase DDX3X;ATP-dependent RNA helicase DDX3Y	DDX3X;DDX3Y	260					39	39	38	63.6	63.6	61.9	73.243	323.31	64618000000	39	461	29.6183	29.6691	29.5842	29.5288	29.7626	29.6995	29.8541	29.779
	5.00163	-0.198185	A0A0D9SF54;A0A0D9SFF6;A0A5F9ZHC3;A0A1B0GTB7;A0A1B0GUH3;A0A0D9SFH4;A0A1B0GV13	A0A0D9SF54		SPTAN1	261					120	120	1	59.1	59.1	0.7	282.83	323.31	116400000000	141	1377	28.4796	28.4545	28.4553	28.4575	28.664	28.6813	28.673	28.6214
	3.41703	-0.296736	A0A0D9SF63;Q9BZK7;A0A1B0GVH3;A0A804HJZ5;A0A2R8YFW3;Q9BQ87;O60907;C9JLJ1;C9JCK0;C9JBN1;A0A0D9SF25;A0A1B0GUU2;C9IYU9	A0A0D9SF63;Q9BZK7;A0A1B0GVH3	F-box-like/WD repeat-containing protein TBL1XR1	TBL1XR1	263					8	8	8	25.3	25.3	25.3	51.556	71.116	2064800000	20	59	25.4565	25.4965	25.6171	25.5608	25.8277	25.8191	25.8883	25.7828
	0.762092	0.290791	A0A0D9SF70;G5E9L0;Q8N6H7;E9PQP3;H0YDN9;E9PMU9;E9PIY6	A0A0D9SF70;G5E9L0;Q8N6H7;E9PQP3;H0YDN9;E9PMU9	ADP-ribosylation factor GTPase-activating protein 2	ARFGAP2	264					7	7	6	22.3	22.3	19.7	42.153	15.129	1160500000	23	42	25.1262	25.672	25.0349	25.5849	24.8561	25.0372	25.0309	25.3306
	0.673503	0.0943375	A0A0D9SFE4;Q05193;A0A0U1RQP1;A0A0D9SFB1;A0A1B0GU67;A0A1B0GUX5;H7C5U0	A0A0D9SFE4;Q05193;A0A0U1RQP1;A0A0D9SFB1;A0A1B0GU67;A0A1B0GUX5	Dynamin-1	DNM1	265					30	30	20	38.3	38.3	26.6	97.237	159.66	10553000000	48	249	26.8795	26.8287	26.651	26.8152	26.7093	26.6054	26.6607	26.8216
	1.78914	-0.224145	Q92614;A0A0D9SFK2;H0YEV9	Q92614;A0A0D9SFK2	Unconventional myosin-XVIIIa	MYO18A	266					41	41	41	27.1	27.1	27.1	233.11	323.31	6786800000	104	196	25.822	25.9913	25.8062	25.9532	26.0661	26.2418	26.1456	26.0157
	0.952719	0.264133	A0A0D9SFP2;A0A0A0MSE2;E9PF18;Q16836;A0A804HKJ2;A0A1W2PQV5;A0A1W2PNM1;A0A804HLB5;A0A1W2PQC2;A0A1W2PQ78;A0A1W2PRT2;A0A804HJW7;A0A804HJK7;A0A1W2PQ55;A0A1W2PP40	A0A0D9SFP2;A0A0A0MSE2;E9PF18;Q16836;A0A804HKJ2;A0A1W2PQV5;A0A1W2PNM1;A0A804HLB5;A0A1W2PQC2;A0A1W2PQ78;A0A1W2PRT2;A0A804HJW7	Hydroxyacyl-coenzyme A dehydrogenase, mitochondrial	HADH	267					10	10	10	39	39	39	35.236	44.62	3982200000	18	86	26.7189	26.5748	26.357	26.6964	26.1602	26.1635	26.3178	26.6491
+	2.37999	0.821681	A0A0D9SFX7;B5MCB4;P51608	A0A0D9SFX7;B5MCB4;P51608	Methyl-CpG-binding protein 2	MECP2	268					1	1	1	11	11	11	19.128	7.5686	344760000	8	20	24.4716	25.0996	24.5651	24.7288	24.1569	23.5919	23.9911	23.8385
	1.47716	-0.991645	Q13642;A0A0D9SFZ9;A0A494C0D6;Q5JXI8;Q5JXI2;Q5JXI3;Q5JXH7;Q5JXH8;Q5JXH9;A0A0D9SFB0;A0A0D9SFI6;Q5JXI0;A0A0D9SGB2;A0A0D9SGD1;A0A494C0J3;A0A0D9SEY7;A0A494C1G1;A0A0D9SGC5	Q13642;A0A0D9SFZ9;A0A494C0D6;Q5JXI8;Q5JXI2;Q5JXI3;Q5JXH7;Q5JXH8;Q5JXH9;A0A0D9SFB0;A0A0D9SFI6;Q5JXI0;A0A0D9SGB2;A0A0D9SGD1;A0A494C0J3;A0A0D9SEY7	Four and a half LIM domains protein 1	FHL1	269					3	3	3	9.3	9.3	9.3	36.263	3.6574	146400000	18	12	23.2865	22.6346	21.8334	22.8454	23.147	23.9514	23.5182	23.9498
	0.347801	0.691023	A0A0D9SG71;A0A0R4J2E5;P49459;A0A0D9SEZ6	A0A0D9SG71;A0A0R4J2E5;P49459;A0A0D9SEZ6	Ubiquitin-conjugating enzyme E2 A	UBE2A	270					2	2	2	22.7	22.7	22.7	13.635	26.392	1331500000	4	21	26.3704	26.4399	26.3237	26.6975	26.7581	26.4918	26.5929	23.2246
	0.285297	-0.325988	A0A1B0GWF2;A0A1B0GVQ5;A0A2R8Y5D4;A0A0D9SG72;A0A1B0GTP9;P61764;A0A1B0GW76;A0A0D9SEP9;A0A0D9SFQ7;A0A0D9SFW6	A0A1B0GWF2;A0A1B0GVQ5;A0A2R8Y5D4;A0A0D9SG72;A0A1B0GTP9;P61764;A0A1B0GW76	Syntaxin-binding protein 1	STXBP1	271					5	5	5	15.2	15.2	15.2	65.215	21.052	302720000	30	16	23.3877	23.652	23.6365	23.6678	24.4406	22.6194	23.8378	24.7503
	1.02552	0.581327	A0A0D9SG79;Q9NZ09	A0A0D9SG79;Q9NZ09	Ubiquitin-associated protein 1	UBAP1	272					2	2	2	4.2	4.2	4.2	57.854	11.167	207060000	24	12	24.1872	23.4878	24.2358	24.2813	23.2922	23.3204	24.1283	23.1259
	0.00954234	-0.00742579	Q8IWS0;A0A0D9SGE8;Q5JRC6	Q8IWS0;A0A0D9SGE8;Q5JRC6	PHD finger protein 6	PHF6	273					10	10	10	32.6	32.6	32.6	41.29	81.017	1900800000	21	63	26.0897	25.4231	25.3473	25.3581	25.8298	25.9256	25.3729	25.1196
	0.640433	0.113882	A0A140T8Z0;A0A0G2JH68;O60610;H9KV28;A0A2R8Y5N1;B4E2I7;H7C2W8;A0A2R8YEF8	A0A140T8Z0;A0A0G2JH68;O60610;H9KV28;A0A2R8Y5N1	Protein diaphanous homolog 1	DIAPH1	275					29	29	29	25.7	25.7	25.7	140.3	131.57	6714400000	59	163	26.7314	26.6339	26.3496	26.579	26.533	26.4447	26.4122	26.4487
	2.77563	-0.193386	A0A0G2JIW1;P0DMV9;P0DMV8;V9GZ37	A0A0G2JIW1;P0DMV9;P0DMV8;V9GZ37	Heat shock 70 kDa protein 1B;Heat shock 70 kDa protein 1A	HSPA1B;HSPA1A	278					28	27	15	58.6	56.5	32.9	70.108	323.31	165830000000	32	585	30.5086	30.4537	30.5254	30.3862	30.6981	30.6611	30.6154	30.6728
	1.24329	1.54859	F5GXS0;A0A140TA49;A0A140TA44;A0A140TA32;A0A140TA29;A0A0G2JL54;A0A0G2JPR0;P0C0L5;P0C0L4;A0A3B3ISA6	F5GXS0;A0A140TA49;A0A140TA44;A0A140TA32;A0A140TA29;A0A0G2JL54;A0A0G2JPR0;P0C0L5;P0C0L4;A0A3B3ISA6	Complement C4-B;Complement C4 beta chain;Complement C4-B alpha chain;C4a anaphylatoxin;C4b-B;C4d-B;Complement C4 gamma chain;Complement C4-A;Complement C4 beta chain;Complement C4-A alpha chain;C4a anaphylatoxin;C4b-A;C4d-A;Complement C4 gamma chain	C4B;C4A	281					5	3	3	3.6	2.7	2.7	187.67	20.425	348920000	78	8	25.1616	23.4933	26.503	25.7254	23.4667	23.7036	24.1261	23.3926
+	2.8734	-0.47873	Q9NX02;A0A0G2JMG8;A0A0G2JPQ2;J3KN39;A0A0G2JLX3;A0A0G2JNC8;A0A0G2JPB6;A0A0G2JLQ8;A0A0G2JP37;A0A0G2JNK1;Q8WX94;A0A0G2JM25;F5GYZ4;K7ERG0;A0A0G2JMB6;A0A0G2JPH3;A0A0G2JNK3;K7ELX1;K7EPE6;F5H5B1;K7EJ90;K7EMK2;F5H7Q5	Q9NX02;A0A0G2JMG8;A0A0G2JPQ2;J3KN39;A0A0G2JLX3;A0A0G2JNC8;A0A0G2JPB6;A0A0G2JLQ8;A0A0G2JP37	NACHT, LRR and PYD domains-containing protein 2	NLRP2	282					13	13	13	17.4	17.4	17.4	120.51	54.889	1595300000	59	59	25.3144	25.3248	25.205	25.4003	25.8602	25.5771	25.9196	25.8027
	0.234292	0.0311704	A0A0G2JNZ2;A0A0G2JPP5;A0A669KB89;Q14160;A0A0G2JMS7;A0A669KAX5;Q5T0G3;Q9BTT6	A0A0G2JNZ2;A0A0G2JPP5;A0A669KB89;Q14160;A0A0G2JMS7	Protein scribble homolog	SCRIB	284					18	18	13	19.4	19.4	12.1	174.91	140.79	2683000000	76	113	25.6502	25.7753	25.5566	25.7107	25.5638	25.6506	25.684	25.6698
	1.13914	0.231153	A0A140T8W8;A0A1W2PR61;A0A1W2PPF8;Q5SPM2;A0A140T8Y4;A0A0G2JPD3;A0A140TA13;A0A140T953;A0A140TA14;A0A140TA11;A0A1W2PP29;A0A1W2PQZ3;A0A1W2PQE2;A0A140T9Z4	A0A140T8W8;A0A1W2PR61;A0A1W2PPF8;Q5SPM2;A0A140T8Y4;A0A0G2JPD3		HLA-A	285					10	10	0	45.8	45.8	0	34.426	68.727	4355100000	20	107	27.3168	27.4531	27.2284	27.2474	27.3277	27.1127	26.9796	26.9012
	0.513013	-0.132934	A0A0G2JQ41;A0A1C7CYZ0;I3L4Y1;Q12979;B7Z683;I3L1U8;I3L2P5;A0A0G2JSE0;A0A0D9SGD7;A0A0G2JRJ1;I3L379;I3L3W0;I3L0R7;I3NI05;H0Y554;P11274	A0A0G2JQ41;A0A1C7CYZ0;I3L4Y1;Q12979;B7Z683	Active breakpoint cluster region-related protein	ABR	287					6	6	6	10.6	10.6	10.6	88.857	22.713	1378300000	40	33	25.633	25.3544	25.5541	25.4949	25.8344	25.7297	25.3526	25.6515
	1.48225	-0.146212	A0A0J9YVP6;A0A0J9YYL3;A0A0J9YXX5;Q9UHX1;A0A0J9YXJ8;A0A0J9YVR6;E9PQ56;A0A0J9YWM1;H0YEM1;E9PN18;E9PMU7;E9PL19;H0YCP8	A0A0J9YVP6;A0A0J9YYL3;A0A0J9YXX5;Q9UHX1;A0A0J9YXJ8;A0A0J9YVR6;E9PQ56;A0A0J9YWM1;H0YEM1	Poly(U)-binding-splicing factor PUF60	PUF60	288					19	19	19	52.8	52.8	52.8	57.398	151.63	7995400000	27	132	27.1307	27.054	26.9162	26.9349	27.1167	27.1487	27.1892	27.166
	1.25225	-0.449152	A0A0J9YWM9;H3BSH7;Q969X6;A0A0J9YXV4;A0A0J9YWK2;H3BRM8	A0A0J9YWM9;H3BSH7;Q969X6;A0A0J9YXV4;A0A0J9YWK2	Cirhin	CIRH1A	289					9	9	9	25.2	25.2	25.2	57.216	24.941	1019600000	24	40	25.0874	24.6118	24.3727	24.9441	25.0069	25.4753	25.2136	25.1168
	1.29213	0.107257	A0A0J9YXF2;Q15165;G3XAK4;A0A0J9YXU7;A0A0J9YYJ1;A0A2Q2SAK4;A0A0J9YYF3;A0A0J9YXM1;A0A0J9YYF0	A0A0J9YXF2;Q15165;G3XAK4	Serum paraoxonase/arylesterase 2	PON2	290					16	16	16	65.9	65.9	65.9	41.527	307.76	34697000000	18	277	29.1778	29.1552	29.0259	29.1259	29.0134	28.9347	29.0394	29.0683
	0.350321	-0.0768094	A0A286YF23;A0A0J9YY01;A0A2R8YFM0;A0A0J9YYB3;A0A0J9YXD6;A0A0J9YW04	A0A286YF23;A0A0J9YY01;A0A2R8YFM0			291					13	13	1	13.2	13.2	0.8	175.85	33.403	1100300000	73	42	24.6565	24.7939	24.6811	24.897	24.9781	24.6596	24.9445	24.7536
	0.161549	-0.0185652	P43243;A8MXP9;A0A0R4J2E8;D6REM6;D6R991;H0Y8T4;B3KM87;D6RBK5;D6RIA2;D6RE02;D6RBI2;D6R8Z5;D6REK4;D6RCM3;D6RAY2;D6RAM9;A0A1B0GX04;D6RBS2;D6R9F3;D6RB45	P43243;A8MXP9;A0A0R4J2E8;D6REM6;D6R991	Matrin-3	MATR3	294					37	37	37	52.5	52.5	52.5	94.622	323.31	60181000000	37	457	30.1044	30.1236	30.1892	30.0655	30.0521	30.1089	30.2028	30.1932
	0.195114	-0.296029	A0A0R4J2F3;P0DPB6	A0A0R4J2F3;P0DPB6			295					3	3	3	39.7	39.7	39.7	13.262	13.465	426310000	5	17	24.8602	24.5695	23.457	24.9255	25.3514	25.2154	25.1484	23.2812
	0.0460684	-0.0684419	A0A0S2Z3I2;A0A7P0T9B3;A0A7P0T913;A0A7P0Z4E3;B7ZKQ9;A0A7P0T9I2;Q8WTV0;F5H4X0;F5H5E8	A0A0S2Z3I2;A0A7P0T9B3;A0A7P0T913;A0A7P0Z4E3;B7ZKQ9;A0A7P0T9I2;Q8WTV0;F5H4X0	Scavenger receptor class B member 1	SCARB1	296					4	4	4	17.3	17.3	17.3	28.666	8.4629	383480000	12	13	24.1092	24.2121	22.4596	24.2131	22.9778	23.9283	24.0664	24.2953
	1.16185	-0.762224	E3W994;A0A0U1RQI6;A0A804HJG7;E7ERI8;E7EW49;J3KR49;O75122;C9J668;H7C4X8;D6RBU8;B3KR06;E7ENG2	E3W994;A0A0U1RQI6;A0A804HJG7;E7ERI8;E7EW49;J3KR49;O75122	CLIP-associating protein 2	CLASP2	298					5	4	4	5.8	4.9	4.9	138.86	23.13	413810000	75	19	24.9742	23.9117	24.7725	23.5348	25.0606	25.0906	25.1102	24.9806
	0.457772	0.14792	A0A0U1RQL9;A0A0U1RQS5;B3KNS4;A0A0U1RQV1;A0A0U1RQN3;Q96A10	A0A0U1RQL9;A0A0U1RQS5;B3KNS4;A0A0U1RQV1;A0A0U1RQN3		hCG_2043597	299					5	5	5	65.8	65.8	65.8	8.6748	37.735	1297100000	4	54	25.3784	25.3261	25.372	25.5735	24.8955	25.2963	25.542	25.3244
	0.204989	-0.237968	Q6P3W7;A0A0U1RQQ9;F8VSC5	Q6P3W7;A0A0U1RQQ9	SCY1-like protein 2	SCYL2	300					5	5	5	7.1	7.1	7.1	103.71	9.4777	264540000	42	11	22.9806	24.0147	22.6621	22.7473	22.4952	23.7933	23.0969	23.9712
	1.24428	-0.267426	Q8TCZ2;A0A0U1RQT8;H0Y4H3	Q8TCZ2;A0A0U1RQT8;H0Y4H3	CD99 antigen-like protein 2	CD99L2	301					3	3	3	17.9	17.9	17.9	27.986	97.775	1305500000	11	21	26.1474	26.0769	26.0074	26.3078	26.4403	26.6505	26.2878	26.2306
	0.678703	-1.64105	A0A0U1RQV4;Q13464	A0A0U1RQV4;Q13464	Rho-associated protein kinase 1	ROCK1	302					6	4	4	6.2	4.5	4.5	133.07	8.9856	454000000	65	14	23.4214	23.9018	24.9206	22.7652	26.207	26.6595	22.1778	26.5288
	0.0722867	-0.0142927	A0A0U1RR32;A0A0U1RRH7;Q99878;Q96KK5;Q9BTM1;Q93077;Q7L7L0;P20671;P0C0S8;P04908;H0YFX9;A0A3B3IS11	A0A0U1RR32;A0A0U1RRH7;Q99878;Q96KK5;Q9BTM1;Q93077;Q7L7L0;P20671;P0C0S8;P04908;H0YFX9;A0A3B3IS11	Histone H2A type 1-J;Histone H2A type 1-H;Histone H2A.J;Histone H2A type 1-C;Histone H2A type 3;Histone H2A type 1-D;Histone H2A type 1;Histone H2A type 1-B/E;Histone H2A	HIST1H2AJ;HIST1H2AH;H2AFJ;HIST1H2AC;HIST3H2A;HIST1H2AD;HIST1H2AG;HIST1H2AB	305					7	7	0	44.4	44.4	0	18.481	133.63	322760000000	8	175	33.6389	33.5759	33.4913	33.3938	33.6584	33.5036	33.5578	33.4373
	0.655439	-0.128014	G3V311;A0A0U1RR71;A0A8C8NWT4;A1L390	G3V311;A0A0U1RR71;A0A8C8NWT4;A1L390	Pleckstrin homology domain-containing family G member 3	PLEKHG3	306					2	2	2	4.3	4.3	4.3	77.752	4.9111	167310000	27	15	23.2877	23.2414	23.2676	23.1313	23.3301	23.589	23.3547	23.1663
	0.113055	-0.127981	B4DG57;A0A0U1RRH6;O94880	B4DG57;A0A0U1RRH6;O94880	PHD finger protein 14	PHF14	308					3	3	3	6	6	6	68.571	3.7771	213760000	29	7	23.7729	23.5819	22.6422	23.3826	23.4927	22.5639	23.6355	24.1995
	0.307012	0.080162	F6XEV2;A0A0U1RRK1;A0A286YF11;Q9BPX6;S4R3D7;S4R3V1;E9PQV6;S4R3W3	F6XEV2;A0A0U1RRK1;A0A286YF11;Q9BPX6;S4R3D7;S4R3V1;E9PQV6	Calcium uptake protein 1, mitochondrial	MICU1	309					8	8	8	18.6	18.6	18.6	54.578	19.565	830140000	27	32	24.8021	24.6339	25.0739	24.6613	24.7902	24.7378	24.7366	24.5861
+	3.20825	-1.88919	Q8WXI9;A0A0U1RRM1;A0A0U1RR30	Q8WXI9;A0A0U1RRM1;A0A0U1RR30	Transcriptional repressor p66-beta	GATAD2B	311					6	6	5	15.7	15.7	13.8	65.26	36.518	539280000	28	26	23.814	23.1895	22.8607	22.8849	25.4771	25.1988	24.5878	25.0421
	1.49737	-0.265418	A6NLN1;A0A7I2V621;A0A0U1RRM4;P26599;A0A7I2V4H6;A0A6Q8PEX4;K7EKJ7;K7EK45;A0A0D9SF20;K7ES59;A0A087WU68;K7ELW5;A0A087WUW5	A6NLN1;A0A7I2V621;A0A0U1RRM4;P26599;A0A7I2V4H6;A0A6Q8PEX4	Polypyrimidine tract-binding protein 1	PTBP1	312					14	14	13	44.2	44.2	42.9	56.51	323.31	152440000000	19	370	32.9777	33.0585	32.8214	33.2087	33.2946	33.1356	33.3379	33.3598
	1.37172	2.22985	A0A1W2PRZ0;A0A140T937;O78179;A0A140T912;A0A140T930;A0A1W2PP77;A0A140T9M5	A0A1W2PRZ0;A0A140T937;O78179;A0A140T912;A0A140T930;A0A1W2PP77;A0A140T9M5		HLA-C	314					8	4	1	36.9	17.5	4.9	36.725	12.411	453290000	17	15	25.4677	25.8204	26.228	22.9107	23.8	23.1467	21.6901	22.8705
	0.0975021	0.085114	A0A140T947;O60231;A0A140T9T4;Q5SQH5;A0A140T8Y5	A0A140T947;O60231	Putative pre-mRNA-splicing factor ATP-dependent RNA helicase DHX16	DHX16	316					3	2	2	4.3	3	3	76.932	4.6267	75187000	35	4	23.3543	22.2316	23.4487	22.7613	22.7027	23.3056	22.7497	22.6975
	1.18933	-1.0242	A0A1W2PR11;A0A140T9B3;Q5QT33;A0A140T962;A0A140T9J9;A0A1W2PRX1;A2BF26;A0A0G2JH50;A0A0G2JIF0;A0A1W2PS56;Q5RIP0;A0A140TA05;A0A140T9L3;A0A140T9E1;A0A140T942;A0A0G2JPA3;A0A140T9B7;D0EV57;A0A0G2JPT2;A0A140T9V0;A0A140T8X0;A0A140T9X6;Q31611;A0A0G2JNX1;A0A140T939;A0A140T9C2;A0A140T9D9;A0A140T9W3;A0A140T9W7;A0A0G2JH66;P13747	A0A1W2PR11;A0A140T9B3;Q5QT33;A0A140T962;A0A140T9J9;A0A1W2PRX1;A2BF26;A0A0G2JH50;A0A0G2JIF0;A0A1W2PS56;Q5RIP0		HLA-C;HLA-Cw	317					7	1	0	32.6	4.9	0	36.848	25.471	579400000	17	21	22.6572	23.1688	24.1317	22.2218	24.5458	23.6612	24.1881	23.8811
	0.768585	1.36818	Q5JNW7;A0A140T998;X5D2R7;P28062	Q5JNW7;A0A140T998;X5D2R7;P28062	Proteasome subunit beta type;Proteasome subunit beta type-8	PSMB8;PSM8	320					3	3	3	16.7	16.7	16.7	27.85	13.304	835270000	17	19	24.9678	25.946	26.0066	26.3679	22.9859	25.9785	23.0649	25.7863
	0.432516	-0.512089	Q03518;A0A140T9T7;A0A2R8Y4Y0	Q03518;A0A140T9T7;A0A2R8Y4Y0	Antigen peptide transporter 1	TAP1	321					3	3	3	5.6	5.6	5.6	80.964	20.432	116980000	33	9	23.4613	23.3921	23.0365	23.1756	24.2353	22.2582	24.577	24.0432
	0.608456	-0.16949	A0A140TA76;K7EMZ9	A0A140TA76;K7EMZ9		LSM14A	322					5	5	1	14.5	14.5	2.9	38.018	58.457	3038000000	13	43	26.9362	26.5989	26.3643	26.5956	26.6939	26.7704	26.9657	26.743
	1.05006	-1.25878	A0A140TA86;Q5XKP0;K7EIR2;A0A140TA84	A0A140TA86;Q5XKP0;K7EIR2;A0A140TA84	Protein QIL1	QIL1;C19orf70	323					2	2	2	27.9	27.9	27.9	15.436	2.1368	290440000	6	15	22.4943	23.4062	23.1144	22.919	22.4736	24.8928	24.888	24.7146
	1.05055	-0.385871	O75787;A0A1B0GVW0;A0A1B0GTU8;A0A1B0GTB0;H7C3E1;A0A1C7CYW4;A0A1B0GVB9;B7Z413;B7Z1I9;A0A1B0GWJ8;A0A1B0GVC7;A0A1B0GU12;A0A1B0GVI9;A0A1B0GWD6;A0A1B0GUT7;H7C240;A0A1B0GV60;A0A1B0GW13;A0A1B0GV24;A0A1B0GVZ1	O75787;A0A1B0GVW0;A0A1B0GTU8;A0A1B0GTB0;H7C3E1;A0A1C7CYW4;A0A1B0GVB9;B7Z413;B7Z1I9;A0A1B0GWJ8;A0A1B0GVC7;A0A1B0GU12;A0A1B0GVI9;A0A1B0GWD6;A0A1B0GUT7	Renin receptor	ATP6AP2	324					6	6	6	21.7	21.7	21.7	39.008	33.614	599170000	15	25	24.6371	25.1398	24.333	25.0186	25.2623	25.1509	25.0398	25.219
+	1.67297	-1.71323	A0A1B0GTC3;A0A1B0GVH5;Q9C0B1;A0A1B0GUC3;A0A1B0GV98;A0A1B0GTC5;A0A1B0GU26;A0A1B0GTY1;A0A1B0GUY7;A0A1B0GTZ8;A0A1B0GTI3	A0A1B0GTC3;A0A1B0GVH5;Q9C0B1;A0A1B0GUC3;A0A1B0GV98;A0A1B0GTC5;A0A1B0GU26;A0A1B0GTY1	Alpha-ketoglutarate-dependent dioxygenase FTO	FTO	325					6	6	6	13.7	13.7	13.7	61.313	14.318	403450000	30	16	23.8302	24.8909	22.3731	23.7068	25.9772	25.0775	25.1925	25.4068
	1.30966	-0.173144	P49419;A0A1B0GW77;A0A1B0GTG2;A0A1B0GW82;A0A1B0GUA1;A0A1B0GTJ4;A0A1B0GTY9;A0A1B0GV49;A0A1B0GUY0;A0A0J9YWF7;H0YHM6;F8VVF2;F8WDY6;A0A1B0GVU0;A0A0J9YWM6;F8WD33;A0A1B0GW65;A0A0J9YWK1	P49419;A0A1B0GW77;A0A1B0GTG2;A0A1B0GW82;A0A1B0GUA1;A0A1B0GTJ4;A0A1B0GTY9;A0A1B0GV49;A0A1B0GUY0;A0A0J9YWF7	Alpha-aminoadipic semialdehyde dehydrogenase	ALDH7A1	327					18	18	18	50.1	50.1	50.1	58.486	194.71	11443000000	25	137	27.7927	27.5697	27.5933	27.6828	27.9021	27.6925	27.8971	27.8394
	0.555643	-0.0498548	A0A1B0GTL5;Q9BXF6	A0A1B0GTL5;Q9BXF6	Rab11 family-interacting protein 5	RAB11FIP5	328					7	7	7	8.6	8.6	8.6	138.41	25.531	550870000	52	21	24.1706	24.3272	24.1622	24.2402	24.2877	24.3104	24.2304	24.2711
	0.255277	-0.256504	Q13510;A0A1B0GTZ5;A0A1B0GTM3;A0A1B0GUA4;A0A1B0GW68;E7EMM4;A0A1B0GUH5;A0A1B0GTP7;A0A1B0GUW4;A0A1B0GUE3;A0A1B0GUG1;A0A1B0GVG2;A0A1B0GUB3;A0A1B0GU62;A0A1B0GU06;A0A1B0GVE7;A0A1B0GVJ1;A0A1B0GW48;A0A1B0GV06;A0A1B0GUJ3;A0A1B0GV95;A0A1B0GVA3;A0A1B0GW66;A0A1B0GVC9;A0A1B0GV88	Q13510;A0A1B0GTZ5;A0A1B0GTM3;A0A1B0GUA4;A0A1B0GW68;E7EMM4;A0A1B0GUH5;A0A1B0GTP7;A0A1B0GUW4;A0A1B0GUE3;A0A1B0GUG1;A0A1B0GVG2;A0A1B0GUB3;A0A1B0GU62;A0A1B0GU06;A0A1B0GVE7;A0A1B0GVJ1;A0A1B0GW48	Acid ceramidase;Acid ceramidase subunit alpha;Acid ceramidase subunit beta	ASAH1	329					10	10	10	30.9	30.9	30.9	44.659	31.846	736590000	24	39	24.6862	23.5839	25.3681	25.2588	25.0446	24.8466	25.0326	24.9993
	0.125106	-0.0260482	F5GZ78;A0A1B0GTU4;P49023;A0A1B0GU60;F5H836;A0A1B0GV30	F5GZ78;A0A1B0GTU4;P49023	Paxillin	PXN	330					12	12	12	28.2	28.2	28.2	64.232	48.49	1923400000	29	67	25.2572	25.4419	25.2246	25.4021	25.4034	25.4336	25.4049	25.1881
+	2.20924	0.682601	A0A3B3IS03;A0A3B3IU51;A0A3B3ITE1;A0A1B0GTW1;A0A2R8YDH4;Q9UDY2	A0A3B3IS03;A0A3B3IU51;A0A3B3ITE1;A0A1B0GTW1;A0A2R8YDH4;Q9UDY2	Tight junction protein ZO-2	TJP2	331					1	1	1	3.2	3.2	3.2	72.784	4.0643	271350000	36	16	24.9752	24.3738	24.4377	24.2894	23.7739	23.7874	24.0093	23.7752
	0.238419	-0.158457	A0A1C7CYY6;A0A1B0GTX1;Q6XZF7	A0A1C7CYY6;A0A1B0GTX1;Q6XZF7	Dynamin-binding protein	DNMBP	332					2	2	2	3.8	3.8	3.8	97.949	16.448	112270000	46	19	23.1375	22.816	23.0414	22.4384	23.5295	23.0841	22.9955	22.4582
	0.0241239	0.0344234	A0A1B0GWA1;A0A1B0GUX9;A0A1B0GWI4;A0A1B0GU58;P05165;A0A1B0GTR1	A0A1B0GWA1;A0A1B0GUX9;A0A1B0GWI4;A0A1B0GU58;P05165	Propionyl-CoA carboxylase alpha chain, mitochondrial	PCCA	333					3	3	3	12	12	12	36.036	8.3715	181560000	20	8	22.5792	23.3908	23.5238	24.2682	23.743	23.9569	22.414	23.5104
	0.934929	0.0969844	A0A6Q8PGG2;A0A6Q8PHL8;A0A6Q8PH45;A0A1B0GUA3;Q96EK5	A0A6Q8PGG2;A0A6Q8PHL8;A0A6Q8PH45;A0A1B0GUA3;Q96EK5	KIF1-binding protein	KIAA1279	334					6	6	6	20.7	20.7	20.7	52.619	20.435	1277200000	25	38	25.4673	25.3179	25.3062	25.2384	25.1827	25.2882	25.2329	25.238
+	1.73743	-3.88237	A0A1B0GV47;Q7Z4S6;H0YHT2;H0YIM7;H0YI78;H0YIM6;Q2M1P5;Q86VH2;O75037	A0A1B0GV47;Q7Z4S6;H0YHT2	Kinesin-like protein KIF21A	KIF21A	337					6	6	6	4.8	4.8	4.8	184.71	11.682	2636300000	65	12	23.1135	22.861	23.3197	27.9089	28.0307	28.2023	28.3682	28.1314
	0.901636	-0.777362	H3BR00;Q9UBD8;H3BNK7;O95086;Q2TA70;A0A1B0GW34;A0A1B0GV71;B4DFF3;A0A1B0GWD3;Q13286	H3BR00;Q9UBD8;H3BNK7;O95086;Q2TA70;A0A1B0GW34;A0A1B0GV71;B4DFF3;A0A1B0GWD3;Q13286	Battenin	CLN3	340					1	1	1	9.7	9.7	9.7	16.41	3.4736	248060000	8	9	22.8471	24.4079	24.3798	22.9483	24.5239	24.3204	24.5352	24.313
	1.21078	0.148189	A0A1B0GVD5;A0A1B0GWE8;P07339;F8W787;A0A1B0GW44;A0A1B0GV23;C9JH19;A0A1B0GVP3;A0A1B0GU92;A0A1B0GU03;H7C469;F8WD96;A0A1B0GVF1	A0A1B0GVD5;A0A1B0GWE8;P07339;F8W787;A0A1B0GW44;A0A1B0GV23;C9JH19;A0A1B0GVP3;A0A1B0GU92;A0A1B0GU03;H7C469;F8WD96	Cathepsin D;Cathepsin D light chain;Cathepsin D heavy chain	CTSD	341					17	17	17	51.6	51.6	51.6	44.237	160.83	24028000000	19	226	29.1799	29.161	29.0385	29.1759	28.8457	29.1013	28.9718	29.0438
	0.623799	-0.199954	A0A6Q8PHE5;A0A1B0GVL3;Q05086;A0A0D9SG77;S4R306;A0A0D9SG63;A0A0D9SF91	A0A6Q8PHE5;A0A1B0GVL3;Q05086;A0A0D9SG77	Ubiquitin-protein ligase E3A	UBE3A	343					6	6	6	8.9	8.9	8.9	93.52	9.3754	394850000	39	11	24.1794	24.1282	24.0182	23.6248	24.0536	24.0255	24.3045	24.3669
	1.04655	0.243782	A0A1B0GW05;Q2PZI1;H7C3M5;H7C1I8	A0A1B0GW05;Q2PZI1	Probable C-mannosyltransferase DPY19L1	DPY19L1	344					4	4	4	8.2	8.2	8.2	84.533	12.188	472260000	30	20	24.7643	24.8503	24.8607	24.8551	24.9321	24.5129	24.3877	24.5228
	0.650753	0.613328	A0A1B0GW23;Q03154;A0A1B0GU86;C9JMV9;A0A1B0GVA5;A0A1B0GV31;F8WC59;C9JYZ0;A0A1B0GVZ3;A0A1B0GVG0;A0A1B0GU36;A0A1B0GUT4;A0A1B0GTG3	A0A1B0GW23;Q03154;A0A1B0GU86;C9JMV9;A0A1B0GVA5;A0A1B0GV31	Aminoacylase-1	ACY1;ABHD14A-ACY1	345					7	7	7	16.6	16.6	16.6	65.332	13.923	475000000	29	21	25.0053	25.2173	23.435	25.3441	24.1162	24.1124	23.9575	24.3623
	3.19736	-0.335854	A0A1C7CYX9;Q16555;E5RFU4	A0A1C7CYX9;Q16555	Dihydropyrimidinase-related protein 2	DPYSL2	346					28	28	23	64.1	64.1	54.7	73.502	323.31	68120000000	39	510	29.5163	29.549	29.3981	29.4696	29.7512	29.7624	29.9242	29.8385
	0.458355	-0.691743	Q9BWM7;A0A1P0AYU5;S4R3N9	Q9BWM7;A0A1P0AYU5;S4R3N9	Sideroflexin-3	SFXN3	348					9	8	8	34.6	28.7	28.7	35.503	14.089	1517000000	20	34	23.6019	26.2056	26.4311	26.2542	26.5041	26.2723	26.3394	26.144
	1.22675	-0.266546	Q969N2;A0A1W2PP53;A0A1W2PNP0;A0A1W2PPS0;A0A1W2PPC3;A0A1W2PP57;A0A1W2PPQ7;A0A1W2PQN1;A0A1W2PQ52;A0A1W2PRZ8;A0A1W2PP13;A0A1W2PQY1;A0A1W2PPR6;A0A1W2PSC5;A0A1W2PPK4;A0A1W2PRH2;H7C2Y2;A0A1W2PR92;A0A1W2PPI8;A0A1W2PQ29;A0A1W2PRV7;A0A1W2PR70;A0A1W2PRB4;A0A1W2PNW9;A0A1W2PRG1;A0A1W2PRH8;A0A1W2PQL3;A0A1W2PP98;A0A1W2PNS2;A0A1W2PRL6;A0A1W2PQI9;A0A1W2PNZ5;A0A1W2PP03;B7Z7C5;A0A1W2PR22;A0A1W2PPU8	Q969N2;A0A1W2PP53;A0A1W2PNP0;A0A1W2PPS0;A0A1W2PPC3;A0A1W2PP57;A0A1W2PPQ7;A0A1W2PQN1;A0A1W2PQ52;A0A1W2PRZ8;A0A1W2PP13;A0A1W2PQY1;A0A1W2PPR6;A0A1W2PSC5	GPI transamidase component PIG-T	PIGT	349					7	7	7	14.9	14.9	14.9	65.699	13.177	1464200000	29	25	25.8124	25.9737	25.678	26.1179	26.0039	26.115	26.2564	26.273
	0.646791	1.61158	A0A1W2PNV4;E9PF58;F8WFD3	A0A1W2PNV4			352					11	2	0	25	4.8	0	75.872	28.047	602190000	33	15	26.3108	23.1227	26.0819	26.0066	22.7177	23.5049	22.4019	26.4512
	0.631374	0.555971	A0A494C0T4;A0A1W2PNW1;H0YJH6;P42226;G3V5I8;G3V370;G3V5K5;Q5FBW6;G3V2L2;G3V2M3;G3V2H4;G3V568	A0A494C0T4;A0A1W2PNW1;H0YJH6;P42226;G3V5I8;G3V370;G3V5K5	Signal transducer and activator of transcription 6	STAT6	353					3	3	3	4.3	4.3	4.3	80.305	5.458	469560000	29	16	24.5315	24.2977	23.9689	25.2837	23.0586	24.0325	24.3446	24.4222
	0.564358	0.808238	A0A1W2PNW2;A0A1W2PP47;A0A1W2PNY5;A0A1W2PQZ6;A0A1W2PRF0;A0A1W2PRJ0;A0A1W2PPP6;A0A1X7SBS0;A0A1W2PS93;A0A1W2PR08;A0A1W2PRF5;G5E9D4;Q96EB1	A0A1W2PNW2;A0A1W2PP47;A0A1W2PNY5;A0A1W2PQZ6;A0A1W2PRF0;A0A1W2PRJ0;A0A1W2PPP6;A0A1X7SBS0;A0A1W2PS93;A0A1W2PR08;A0A1W2PRF5;G5E9D4;Q96EB1	Elongator complex protein 4	ELP4	354					2	2	2	12.8	12.8	12.8	25.86	3.3754	97829000	13	6	24.1653	23.5403	24.264	23.8306	22.2894	21.7773	24.2909	24.2096
	0.972921	-0.735767	O14653;I3NI02;E7EQ34;A0A1W2PS81;A0A1W2PQM3;A0A1W2PPG1;A0A1W2PPP5;A0A1W2PPG5;A0A1W2PRL0;A0A1W2PQP2;A0A1W2PRC2;I3L4Z6;I3L0K1;A0A1W2PRP7;A0A1W2PRV0;A0A1W2PS12;A0A1W2PR02;A0A1W2PPW8;A0A1W2PPJ0;A0A1W2PR23;A0A1W2PRE6;A0A1W2PQE0;A0A1W2PQS3;I3L1K7;A0A1W2PNV3;A0A1W2PQ77;A0A1X7SBU8;A0A1W2PP28;A0A1W2PQ06;A0A1W2PQ38;A0A1W2PRD0;A0A1W2PQQ4;A0A1W2PQ12	O14653;I3NI02;E7EQ34;A0A1W2PS81;A0A1W2PQM3;A0A1W2PPG1;A0A1W2PPP5;A0A1W2PPG5;A0A1W2PRL0;A0A1W2PQP2;A0A1W2PRC2;I3L4Z6;I3L0K1;A0A1W2PRP7;A0A1W2PRV0;A0A1W2PS12;A0A1W2PR02;A0A1W2PPW8;A0A1W2PPJ0;A0A1W2PR23;A0A1W2PRE6;A0A1W2PQE0;A0A1W2PQS3;I3L1K7;A0A1W2PNV3;A0A1W2PQ77;A0A1X7SBU8	Golgi SNAP receptor complex member 2	GOSR2	356					4	4	4	31.6	31.6	31.6	24.775	39.317	321790000	9	23	24.6532	22.9673	24.4442	23.716	24.8613	24.6135	24.609	24.6401
	0.0624309	-0.0112324	A0A1W2PQT3;A0A1W2PPH1;A0A1W2PQH3;A0A1W2PQY8;P23368;A0A1W2PQ37;A0A1W2PQF8;A0A1W2PR68;A0A1W2PRS2;A0A1W2PRY9;A0A1W2PQH4;A0A1W2PPY2;A0A1W2PRH1;Q6TCH8;E9PMB9;Q16798	A0A1W2PQT3;A0A1W2PPH1;A0A1W2PQH3;A0A1W2PQY8;P23368;A0A1W2PQ37;A0A1W2PQF8;A0A1W2PR68	NAD-dependent malic enzyme, mitochondrial	ME2	357					16	16	16	47.2	47.2	47.2	59.787	114.62	3484100000	29	110	26.2297	26.1981	26.4242	26.2399	26.1894	26.3579	26.3323	26.2573
	0.215771	-0.0411963	A0A1W2PPZ5;P23193;A0A1W2PRL9;E5RIS7;B7Z4S1;E5RJ93;A0A0A0MT58;Q15560;E5RK46;A0A1W2PS15;E5RFI1;A0A1W2PPV7;Q5JRI7	A0A1W2PPZ5;P23193;A0A1W2PRL9	Transcription elongation factor A protein 1	TCEA1	358					13	13	13	46.5	46.5	46.5	33.935	101.03	5204800000	17	83	26.9022	27.0641	27.1659	27.237	27.1348	27.0931	27.1983	27.1079
	1.12321	0.527472	Q14353;A0A1W2PR36;K7EM34	Q14353;A0A1W2PR36;K7EM34	Guanidinoacetate N-methyltransferase	GAMT	360					2	2	2	25.4	25.4	25.4	26.318	10.274	392500000	7	13	24.9243	24.6316	24.5872	25.0359	24.4702	23.654	24.2757	24.6692
	0.229407	0.135504	A0A1W2PS43;A0A1W2PRS1;Q14108;A0A1W2PRF6;A0A1W2PPX5;A0A1W2PQR6;A0A1W2PQB7;A0A1W2PPU6;D6RDG0;A0A1W2PS70;A0A1W2PNX7;A0A1W2PQL5;A0A1W2PSE4	A0A1W2PS43;A0A1W2PRS1;Q14108;A0A1W2PRF6;A0A1W2PPX5;A0A1W2PQR6;A0A1W2PQB7;A0A1W2PPU6	Lysosome membrane protein 2	SCARB2	362					6	6	6	18.5	18.5	18.5	53.891	102.01	2452600000	24	60	26.469	26.2952	26.378	26.5436	25.6151	26.3999	26.6786	26.4503
	0.672743	0.4046	A0A1W2PRV5;E7EQZ4;Q16637;B4DP61	A0A1W2PRV5;E7EQZ4;Q16637;B4DP61	Survival motor neuron protein	SMN1;SMN2	363					2	2	2	6.7	6.7	6.7	30.415	2.9343	308600000	7	10	24.6273	24.6374	24.4331	24.5845	24.4627	23.308	24.4268	24.4665
	0.0943682	0.0851111	A0A1W2PS24;Q5SRN5;P04439;Q5SRN7;Q5SUL5;A0A0G2JIF2;A0A0G2JL56;A0A0G2JI36;A0A1W2PQD0;A0A1W2PSE7;A0A140T9H3;A0A140T9G0;A0A140T9A9	A0A1W2PS24;Q5SRN5;P04439;Q5SRN7;Q5SUL5;A0A0G2JIF2;A0A0G2JL56;A0A0G2JI36;A0A1W2PQD0;A0A1W2PSE7	HLA class I histocompatibility antigen, A-3 alpha chain	HLA-A	365					8	4	1	36.6	18.5	7.4	36.784	22.566	1029500000	21	39	25.6482	25.9372	26.4678	25.8057	26.6486	25.9154	25.531	25.4235
	0.126284	0.0174866	A0A1X7SBZ2;A0A5H1ZRQ2;Q92841;A0A0U1RQJ0	A0A1X7SBZ2;A0A5H1ZRQ2;Q92841	Probable ATP-dependent RNA helicase DDX17	DDX17	366					30	22	22	48.3	36.6	36.6	80.253	315.84	20892000000	37	241	27.6553	27.6753	27.8344	27.6263	27.711	27.6278	27.7252	27.6573
+	3.73672	-0.432513	A0A286YF22;O43175;A0A2C9F2M7;A0A286YFL2;A0A286YFA2;A0A286YFM8;A0A286YER3;A0A286YFC8;A0A286YFB2;A0A286YF34;A0A286YF78;A0A286YFF3;A0A286YFK5;A0A286YFE1	A0A286YF22;O43175;A0A2C9F2M7;A0A286YFL2;A0A286YFA2	D-3-phosphoglycerate dehydrogenase	PHGDH	368					14	14	14	34.4	34.4	34.4	55.938	112.92	3884000000	24	103	25.9919	25.836	26.0179	26.0043	26.3219	26.4262	26.4656	26.3664
	1.64578	0.49202	A0A286YFD6;P31350;A0A7P0SBL1;A0A0C4DGZ6	A0A286YFD6;P31350;A0A7P0SBL1	Ribonucleoside-diphosphate reductase subunit M2	RRM2	369					8	8	6	24.9	24.9	19	42.906	13.868	867180000	23	26	25.3893	25.553	25.2992	25.1359	24.7555	24.7164	24.6798	25.2576
	2.07766	-0.335279	Q5T0S4;A0A286YFE3;A0A2C9F2P4;A0A286YFL8;A0A286YFF7;P50897;A0A286YFL6;E9PK48;E9PIA8	Q5T0S4;A0A286YFE3;A0A2C9F2P4;A0A286YFL8;A0A286YFF7;P50897	Palmitoyl-protein thioesterase 1	PPT1	370					5	5	5	25.5	25.5	25.5	31.36	26.631	1094000000	11	35	24.736	24.5237	24.7531	24.8797	25.09	24.9219	25.1143	25.1075
	0.0615655	0.0433531	Q7Z3U7;A0A286YFF8;F8VZV1	Q7Z3U7;A0A286YFF8	Protein MON2 homolog	MON2	371					3	3	3	2.2	2.2	2.2	190.36	9.5384	285940000	82	14	23.6364	24.3022	23.8595	24.5065	24.2196	24.3469	23.8598	23.7048
	0.549329	-0.184352	Q5SWX3;A0A2Q3DQE3;H0Y6G2;Q13555;Q8WU40;A0A804CJ50;H7C394	Q5SWX3;A0A2Q3DQE3;H0Y6G2;Q13555;Q8WU40;A0A804CJ50	Calcium/calmodulin-dependent protein kinase type II subunit gamma	CAMK2G	372					10	6	5	26.9	17.8	15.5	57.796	14.142	579230000	25	23	24.2748	24.4123	24.3889	23.9401	24.4352	24.3594	24.7445	24.2144
	0.117644	-0.204102	A0A2R8Y6I1;A0A2R8Y3N3;A0A2R8Y5P7;P49590;D6RB22;D6RJE6;B4DQ67;A0A2R8Y4X6;A0A2R8Y5E8	A0A2R8Y6I1;A0A2R8Y3N3;A0A2R8Y5P7;P49590;D6RB22;D6RJE6;B4DQ67	Probable histidine--tRNA ligase, mitochondrial	HARS2	373					10	3	3	29.1	13.1	13.1	49.246	11.473	182870000	22	5	24.6309	24.2892	22.9057	23.2992	24.8609	23.3356	22.9204	24.8245
	0.305955	-0.25734	A0A2R8Y620;A0A2R8Y7U2;A0A2R8Y600;A0A2R8Y455;Q86VX2;V9GY66	A0A2R8Y620;A0A2R8Y7U2;A0A2R8Y600;A0A2R8Y455;Q86VX2;V9GY66	COMM domain-containing protein 7	COMMD7	375					3	3	3	20.3	20.3	20.3	20.151	11.73	126120000	9	5	22.6359	23.1835	23.7568	23.9948	24.0028	23.7532	23.6971	23.1472
+	1.75147	-1.39709	A0A2R8YFK2;A0A2R8Y6M6;A0A2R8Y4C2;A0A2R8YFS8;A0A2R8Y8C4;A0A2R8Y5C9;A0A2R8Y596;P56945;A0A2R8Y5E4;H3BN62;H3BVF0;H3BSY4;H3BQJ7;H3BSB2	A0A2R8YFK2;A0A2R8Y6M6;A0A2R8Y4C2;A0A2R8YFS8;A0A2R8Y8C4;A0A2R8Y5C9;A0A2R8Y596;P56945;A0A2R8Y5E4	Breast cancer anti-estrogen resistance protein 1	BCAR1	376					5	5	4	10.1	10.1	9.2	93.165	42.062	479350000	42	20	23.0762	24.6452	23.6201	22.7362	24.7255	24.9242	24.793	25.2233
	0.700751	0.69931	A0A2R8YEA0;A0A2R8Y7K2;A0A2R8Y5N9;A0A2R8YFW8;A0A2R8YCL5;A0A2R8Y4I8;A0A2U3TZR0;Q9UBP0;A0A2R8Y481;A0A2R8YGN6	A0A2R8YEA0;A0A2R8Y7K2;A0A2R8Y5N9;A0A2R8YFW8;A0A2R8YCL5;A0A2R8Y4I8;A0A2U3TZR0;Q9UBP0;A0A2R8Y481;A0A2R8YGN6	Spastin	SPAST	379					2	2	2	19.9	19.9	19.9	17.719	11.212	169190000	10	9	23.774	24.5864	24.0599	23.9297	23.9608	22.4005	22.8689	24.3226
	0.201257	-0.202053	A0A2R8Y4W2;A0A2R8YE63;Q12929;F5H0R8	A0A2R8Y4W2;A0A2R8YE63;Q12929	Epidermal growth factor receptor kinase substrate 8	EPS8	383					5	5	5	11.4	11.4	11.4	92.75	20.563	556740000	35	20	24.8412	24.8076	24.605	23.2503	24.774	24.7086	24.2385	24.5913
	1.15541	0.797539	Q9UQ90;A0A2U3TZH1;A0A2R8YFW4;A0A2R8YDQ1;A0A2R8Y4Y7;A0A2R8Y7B8;A0A2R8Y726;A0A2R8Y6K2;A0A2R8Y4L7;A0A2R8Y7E2;A0A2R8YFJ7;A0A2R8Y729;A0A2R8YFN9;A0A2R8Y632;A0A2R8Y7N2;A0A2R8YFF4;A0A2R8YGZ0;A0A2R8Y4M0;A0A2R8YG79;A0A2R8Y6Z7;A0A2R8Y4L0;A0A2R8YGV4;A0A2R8Y3M4;A0A2R8Y6E8	Q9UQ90;A0A2U3TZH1;A0A2R8YFW4;A0A2R8YDQ1;A0A2R8Y4Y7;A0A2R8Y7B8;A0A2R8Y726;A0A2R8Y6K2;A0A2R8Y4L7;A0A2R8Y7E2;A0A2R8YFJ7;A0A2R8Y729;A0A2R8YFN9;A0A2R8Y632;A0A2R8Y7N2;A0A2R8YFF4;A0A2R8YGZ0;A0A2R8Y4M0;A0A2R8YG79;A0A2R8Y6Z7;A0A2R8Y4L0;A0A2R8YGV4;A0A2R8Y3M4;A0A2R8Y6E8	Paraplegin	SPG7	384					2	2	2	5.7	5.7	5.7	88.234	4.6316	128510000	41	5	24.2444	24.0901	23.1083	23.363	22.5029	23.4025	22.5029	23.2072
	0.0933009	0.0822597	Q14004;A0A2R8Y4Z0;A0A2R8Y7W5;A0A2R8YD28;Q9BVE2;A0A2R8YF61;A0A2R8Y644;A0A087X209;A0A2R8YEB7;A0A2R8YCQ1;H0YAZ9;A0A2R8Y7Y0;E5RGN0;A0A087WZU2;Q96Q40;O94921;F5H6Z0;Q07002;Q00536;Q00537;E7EUK8	Q14004;A0A2R8Y4Z0;A0A2R8Y7W5;A0A2R8YD28;Q9BVE2;A0A2R8YF61;A0A2R8Y644;A0A087X209;A0A2R8YEB7	Cyclin-dependent kinase 13	CDK13	385					3	1	1	2.7	1.1	1.1	164.92	3.2666	89158000	67	14	23.2647	22.3254	23.11	22.3422	22.387	23.272	22.4334	22.6209
	0.273691	-0.0882554	A0A2R8Y804;A0A2R8Y543;A0A2R8Y5C3;A0A2R8Y750;B4DGU4;A0A2R8YCH5;A0A2R8Y5A3;P35222;A0A2R8Y5Z1;A0A2R8Y7Z0;A0A2R8Y6G0;A0A2R8Y815;A0A2R8YG06;C9IZ65	A0A2R8Y804;A0A2R8Y543;A0A2R8Y5C3;A0A2R8Y750;B4DGU4;A0A2R8YCH5;A0A2R8Y5A3;P35222;A0A2R8Y5Z1;A0A2R8Y7Z0;A0A2R8Y6G0	Catenin beta-1	CTNNB1	386					17	13	13	33.3	26.5	26.5	77.206	75.929	1998400000	42	84	25.7005	26.0194	25.5029	25.4989	25.8441	25.6124	25.8099	25.8083
	1.09606	-0.926641	A0A2R8Y544;Q9BR61	A0A2R8Y544;Q9BR61	Acyl-CoA-binding domain-containing protein 6	ACBD6	387					2	2	2	7.5	7.5	7.5	28.129	2.181	264530000	14	3	23.0507	24.3545	22.8675	24.4127	24.4864	24.341	24.5216	25.0429
	2.83977	-0.368555	A0A2R8Y595;A0A2R8YFL0;P49711;V9GY73;Q8NI51	A0A2R8Y595;A0A2R8YFL0;P49711	Transcriptional repressor CTCF	CTCF	388					12	12	12	24.8	24.8	24.8	72.999	51.242	2322200000	24	82	25.4341	25.5194	25.5067	25.3379	25.6859	25.7903	25.8755	25.9206
	0.0843779	-0.034286	Q99700;F8WB06;A0A5F9ZHW5;A0A5F9ZHX3;A0A2R8Y5A6;A0A2R8Y7E6;A0A5F9ZI57;V9GY86;F8VQP2;A0A5F9ZHH4;A0A2R8YDM9;A0A2R8Y7P6;H0YH87;F8W0B5;F8VRK6;A0A5F9ZH85;F8WB05	Q99700;F8WB06;A0A5F9ZHW5;A0A5F9ZHX3;A0A2R8Y5A6;A0A2R8Y7E6;A0A5F9ZI57;V9GY86;F8VQP2;A0A5F9ZHH4;A0A2R8YDM9;A0A2R8Y7P6;H0YH87;F8W0B5;F8VRK6	Ataxin-2	ATXN2	389					10	10	10	9.7	9.7	9.7	140.28	78.194	1508300000	46	45	25.4375	25.4256	25.1866	24.9701	25.0605	25.2936	25.5315	25.2714
	0.654222	-0.905222	A0A2R8Y5F1;A0A2R8YGU4;X5D2U8;H3BMQ0;A0A2R8YDZ2;A0A2R8Y7X5;A0A2R8YDR3;A0A2R8Y7C8;A0A2R8YGD6;P49815;A0A2R8Y6C9;A0A2R8Y692;Q5HYF7;A0A2R8Y5B2;A0A2R8YGE6;A0A2R8YEJ8	A0A2R8Y5F1;A0A2R8YGU4;X5D2U8;H3BMQ0;A0A2R8YDZ2;A0A2R8Y7X5;A0A2R8YDR3;A0A2R8Y7C8;A0A2R8YGD6;P49815;A0A2R8Y6C9	Tuberin	TSC2	390					3	3	3	1.7	1.7	1.7	193.03	2.4504	478740000	84	7	25.3309	22.7035	25.4522	25.211	25.4259	25.4513	25.7496	25.6918
+	3.40364	-0.370729	Q15813;A0A2R8Y5Q8;A0A2R8YHI9;A0A2U3TZJ6;A0A2R8YFL4;A0A2R8Y7E7;A0A2R8Y6Q1;A0A2R8Y4V6;A0A2R8YER9;A0A2R8Y809;A0A2R8Y784;A0A2R8YFM3;A0A2R8Y787;A0A2R8Y6G3;A0A2R8Y4P2;A0A2R8Y5H6;A0A2R8Y7H8;A0A2R8Y897;A0A2R8Y6L2;A0A2R8Y4E7;A0A2R8YF12;A0A2R8YFG9;A0A2R8Y597;A0A2R8YH53;A0A2R8Y3S1	Q15813;A0A2R8Y5Q8;A0A2R8YHI9;A0A2U3TZJ6;A0A2R8YFL4;A0A2R8Y7E7;A0A2R8Y6Q1;A0A2R8Y4V6;A0A2R8YER9;A0A2R8Y809	Tubulin-specific chaperone E	TBCE	393					20	20	20	58.1	58.1	58.1	59.345	164.65	6078900000	36	173	26.1699	26.2627	26.0882	26.0576	26.5825	26.5212	26.4901	26.4676
	0.00279515	0.000862598	A0A2R8Y5S7;P35241;A0A2R8Y7M3;E9PNV3;A0A2R8Y5P0;E9PQ82;A0A2R8Y4H6;E9PKN5	A0A2R8Y5S7;P35241;A0A2R8Y7M3	Radixin	RDX	394					32	18	18	45.8	28.1	28.1	69.335	122.78	10159000000	31	138	28.1752	28.0272	28.0187	28.06	28.045	27.8113	28.2573	28.1641
	0.868928	0.188101	A0A2R8Y7Q9;A0A2R8YEK8;A0A2R8Y5S9;Q9Y5P4;A0A2R8Y5H3;A0A2R8YFI2;A0A2R8YEA4;A0A2U3TZL3;A0A2R8YE18;A0A2R8Y7C5;A0A2R8YCI0;A0A2R8YE59;A0A2R8YFA1	A0A2R8Y7Q9;A0A2R8YEK8;A0A2R8Y5S9;Q9Y5P4;A0A2R8Y5H3;A0A2R8YFI2;A0A2R8YEA4;A0A2U3TZL3;A0A2R8YE18;A0A2R8Y7C5;A0A2R8YCI0;A0A2R8YE59	Collagen type IV alpha-3-binding protein	COL4A3BP	395					8	8	8	16.6	16.6	16.6	64.357	17.741	666000000	32	26	24.4545	24.4956	24.7197	24.3329	24.3675	24.4828	24.1407	24.2593
	0.304207	-0.491046	A0A2R8Y602;A0A2R8YDH5;F5H7A5;F5H392	A0A2R8Y602			396					8	1	1	31.2	3.4	3.4	43.351	3.5007	410350000	17	9	23.6892	23.5878	23.2531	23.2107	22.2401	24.9959	23.4688	25.0002
+	1.81326	-0.861448	A0A2R8Y611	A0A2R8Y611			397					10	2	2	12.5	1.9	1.9	106.19	17.732	283260000	40	20	22.6523	23.4915	23.6345	22.8492	23.7414	24.1315	24.0994	24.101
	0.249377	-0.178666	A0A2R8Y653;Q9BZX2;Q9HA47	A0A2R8Y653;Q9BZX2	Uridine-cytidine kinase 2	UCK2	398					7	7	7	39.2	39.2	39.2	27.408	27.002	1242600000	14	39	25.6066	25.5934	25.0095	25.5337	26.2204	25.8471	25.2473	25.1431
	0.134045	-0.0423155	A0A2R8Y6J3;P46777;Q5T7N0;A0A2R8Y4A2	A0A2R8Y6J3;P46777	60S ribosomal protein L5	RPL5	399					11	11	11	50.8	50.8	50.8	27.045	96.659	41970000000	11	263	29.9371	29.969	29.9661	29.991	30.3332	30.016	29.9027	29.7806
	0.255233	0.254911	A0A2R8Y6S3;C9J167;P54278	A0A2R8Y6S3;C9J167;P54278	Mismatch repair endonuclease PMS2	PMS2	400					2	2	2	4.3	4.3	4.3	81.331	4.9232	79234000	35	7	22.3209	23.6643	23.6382	22.4824	23.302	22.4618	22.7754	22.5471
	0.267143	-0.0690532	A0A2R8YDQ9;A0A2R8Y6Y7;Q9P2R7;Q5T9Q5;Q5T9Q8;A0A0U1RQL1;A0A0U1RRI1;A0A0U1RQF8;A0A2R8Y5P6;A0A2R8Y6E6	A0A2R8YDQ9;A0A2R8Y6Y7;Q9P2R7;Q5T9Q5	Succinyl-CoA ligase [ADP-forming] subunit beta, mitochondrial	SUCLA2	402					7	7	7	22.5	22.5	22.5	43.841	41.115	1789900000	24	47	25.9909	25.9849	25.9536	25.796	26.0701	26.2286	25.9201	25.7828
	1.76016	0.563447	Q13136;A0A2R8Y7R9;H0YDW2;O75334;O75145;G3V200;H0YD72;E9PJZ7;F8VWR9;B1APN9;H0YHK3;R4GN36;R4GNF1;A0A1B0GVT3;H0YHJ4;H0YIJ4;E9PPF6;O75335;H0YEF9	Q13136;A0A2R8Y7R9;H0YDW2	Liprin-alpha-1	PPFIA1	404					5	5	5	5.8	5.8	5.8	135.78	9.2819	423820000	59	24	24.1812	24.8214	24.6667	24.3246	24.1555	23.726	23.9736	23.885
	0.93926	-0.194796	P62263;A0A2R8Y811;E5RH77	P62263;A0A2R8Y811;E5RH77	40S ribosomal protein S14	RPS14	405					6	6	6	64.2	64.2	64.2	16.273	250.27	50323000000	4	129	30.8986	30.7235	30.6317	30.5696	31.1024	30.7587	30.8002	30.9413
	0.451906	-0.228933	E7ETK0;A0A2R8Y849;A0A2R8YD14;P62847;A0A2R8Y8A0	E7ETK0;A0A2R8Y849;A0A2R8YD14;P62847;A0A2R8Y8A0	40S ribosomal protein S24	RPS24	406					3	3	3	29	29	29	15.197	26.697	11289000000	6	69	27.9947	28.0814	28.052	28.0497	27.6284	28.3076	28.6621	28.4953
	1.39189	-0.284742	A0A2R8Y851;P62273;A0A2R8Y6P7;A0A087WTT6	A0A2R8Y851;P62273;A0A2R8Y6P7;A0A087WTT6	40S ribosomal protein S29	RPS29	407					3	3	3	21.8	21.8	21.8	10.256	72.131	25635000000	4	54	30.0952	30.5564	30.2771	30.4088	30.64	30.4838	30.7158	30.6369
	0.606214	-0.21338	A0A2R8YDI1;A0A2R8Y852;P39880;A0A2R8Y8D0	A0A2R8YDI1;A0A2R8Y852;P39880	Homeobox protein cut-like 1	CUX1	408					8	8	3	8.3	8.3	3.1	148.57	18.238	1823100000	64	20	27.0653	26.9973	27.4478	27.0673	27.4416	27.5868	26.979	27.4239
	1.7156	-0.251847	J3QKS7;A0A2R8Y855;B4DGM3;Q969G3;A0A2R8Y765;A0A2R8Y7U4;A0A2U3TZQ7;A0A2R8Y7I9;A0A2R8Y4T4;A0A2R8YES3;J3QR61;J3KT85;A0A2R8YD78;A0A2R8YEB8;J3QKX6	J3QKS7;A0A2R8Y855;B4DGM3;Q969G3;A0A2R8Y765;A0A2R8Y7U4;A0A2U3TZQ7;A0A2R8Y7I9;A0A2R8Y4T4;A0A2R8YES3;J3QR61	SWI/SNF-related matrix-associated actin-dependent regulator of chromatin subfamily E member 1	SMARCE1	409					8	7	7	32.8	30.3	30.3	33.304	21.111	765920000	19	30	25.0949	25.0844	25.0062	24.7822	25.1684	25.3111	25.2797	25.216
	1.26128	-0.411441	A0A2R8Y891;P08237;F8VZI0;F8VP00;F8VX13;F8VZQ1	A0A2R8Y891;P08237;F8VZI0	ATP-dependent 6-phosphofructokinase, muscle type	PFKM	410					17	16	15	25.3	24.2	23.2	96.907	48.841	2406900000	38	78	25.6734	25.0234	25.6257	25.7288	26.028	25.8676	25.998	25.8034
	0.748154	1.32411	A0A2R8YGD1;A0A2R8YD45;A0A804HJ17;O14773;A0A2R8Y7U1;A0A2R8YDY1;A0A2R8Y7I4	A0A2R8YGD1;A0A2R8YD45;A0A804HJ17;O14773;A0A2R8Y7U1	Tripeptidyl-peptidase 1	TPP1	411					3	3	3	8.1	8.1	8.1	50.889	7.333	1245500000	18	28	26.2859	26.3242	26.3655	26.3202	25.6742	22.4008	26.0121	25.9122
	1.08631	-0.0957499	P51659;E7EPL9;A0A804HK65;A0A2R8YD50;A0A804HKU2;E7ET17;A0A2R8Y7L2;E7ER27;A0A804HIR1;A0A2R8YDT8;A0A2R8YF45;A0A804HIG8;A0A804HK88;A0A2R8Y7W2;A0A2R8YEG2;A0A804HKB5;A0A804HKT2;A0A804HLJ0	P51659;E7EPL9;A0A804HK65;A0A2R8YD50;A0A804HKU2;E7ET17;A0A2R8Y7L2;E7ER27;A0A804HIR1	Peroxisomal multifunctional enzyme type 2;(3R)-hydroxyacyl-CoA dehydrogenase;Enoyl-CoA hydratase 2	HSD17B4	412					29	29	29	52.7	52.7	52.7	79.685	263.54	9388400000	42	207	26.8061	26.654	26.8127	26.8244	26.9264	26.8785	26.8225	26.8529
	1.91256	-0.315261	P68400;E7EU96;A0A2R8YD58;A0A2R8Y5A0;A0A2R8YFU2;Q8NEV1;A0A2R8YF43;A0A2R8YDP2;A0A2R8Y4D6;A0A2R8Y4H0;V9GYA2;A0A2R8YDY7;A0A2R8YEW1;A0A087WY74;A0A2R8YCK2;V9GYW6;A0A2R8Y7T1;A0A2R8YF47;V9GY80;A0A2R8YEL7;A0A2R8Y797;A0A2R8Y3W6;A0A2R8YCC9	P68400;E7EU96;A0A2R8YD58;A0A2R8Y5A0;A0A2R8YFU2;Q8NEV1;A0A2R8YF43;A0A2R8YDP2;A0A2R8Y4D6;A0A2R8Y4H0	Casein kinase II subunit alpha;Casein kinase II subunit alpha 3	CSNK2A1;CSNK2A3	413					17	17	17	53.5	53.5	53.5	45.143	323.31	12658000000	18	199	27.1513	27.2486	27.0464	27.1097	27.4923	27.2352	27.6071	27.4825
	0.358554	-0.118915	A0A2U3TZN6;A0A2U3TZM4;A0A7I2RJN6;A0A2R8YFN5;A0A2U3TZM1;A0A2R8YE77;Q5JS79;O14936;A0A2R8YEK3;A0A2R8Y6F8;A0A2R8YEJ7;A0A2R8Y3B3;Q5JS72;A0A2R8Y7X6;A0A2R8Y6D8;A0A2R8YGH2	A0A2U3TZN6;A0A2U3TZM4;A0A7I2RJN6;A0A2R8YFN5;A0A2U3TZM1;A0A2R8YE77;Q5JS79;O14936;A0A2R8YEK3;A0A2R8Y6F8	Peripheral plasma membrane protein CASK	CASK	414					9	9	9	14.7	14.7	14.7	100.2	101.14	1706900000	45	57	25.6536	25.5816	25.6632	25.3482	25.3403	25.7524	25.9249	25.7046
	0.223021	-0.362576	F5H6Y0;H3BMM5;A0A2R8YF87;Q96AX1	F5H6Y0;H3BMM5;A0A2R8YF87;Q96AX1	Vacuolar protein sorting-associated protein 33A	VPS33A	417					2	2	2	10.8	10.8	10.8	21.226	9.008	327750000	11	16	24.7602	25.2446	23.6625	22.5901	24.6088	24.8511	24.6219	23.6258
	0.0676505	-0.0232472	A0A2R8YFH5;Q15437;Q5QPE2;Q5QPE1	A0A2R8YFH5;Q15437;Q5QPE2	Protein transport protein Sec23B	SEC23B	418					8	6	6	15.1	11.9	11.9	84.472	31.13	1647900000	37	52	25.6824	25.2635	25.3356	25.4827	25.5226	25.482	25.6144	25.2381
	0.39677	-0.828279	E7EUY6;B1ALK7;A0A2R8YG42;Q14155;E9PDQ5;F6SJA5	E7EUY6;B1ALK7;A0A2R8YG42;Q14155;E9PDQ5	Rho guanine nucleotide exchange factor 7	ARHGEF7	419					4	4	4	15.4	15.4	15.4	50.493	9.8813	300240000	26	10	22.8437	25.018	22.5238	22.6499	22.0888	24.1324	25.0152	25.1121
	0.781107	-0.0816822	A0A2U3TZH3;Q05639;A0A2R8Y488;A0A2R8Y660;A0A2R8YDN5	A0A2U3TZH3;Q05639	Elongation factor 1-alpha 2	EEF1A2	421					20	10	10	57.9	36.5	36.5	54.34	216	29769000000	23	171	30.109	29.9193	30.0001	29.9811	30.0845	30.0692	30.0104	30.1721
	2.5571	0.222163	E9PNW4;A0A2U3TZL5;P13987;H0YET2	E9PNW4;A0A2U3TZL5;P13987	CD59 glycoprotein	CD59	422					3	3	3	29.6	29.6	29.6	11.985	50.023	9158300000	5	33	28.3034	28.2703	28.4699	28.3108	28.14	28.1206	28.1062	28.0989
+	3.24582	-0.371765	A0A2U3TZL8;H7BYN4;A0A7I2V5Y5;Q02241;H0YME6;A0A2R8Y531;H0YMJ4	A0A2U3TZL8;H7BYN4;A0A7I2V5Y5;Q02241	Kinesin-like protein;Kinesin-like protein KIF23	KIF23	423					17	17	17	25.3	25.3	25.3	92.682	109.16	4047500000	43	130	25.8338	25.9694	25.918	25.8874	26.4184	26.2273	26.214	26.236
	0.484668	-0.0723696	P06744;A0A2U3TZU2;K7EQ48;A0A2R8Y6C7;A0A0J9YYH3;A0A0J9YXP8;A0A0J9YX90;K7EPY4;K7ERC6;K7EP41;K7ENA0;A0A0J9YXM3;K7ELR7;A0A2R8YF08;K7ERK8;K7EIL4;A0A0J9YXH9;A0A0J9YYI8	P06744;A0A2U3TZU2;K7EQ48;A0A2R8Y6C7;A0A0J9YYH3;A0A0J9YXP8;A0A0J9YX90	Glucose-6-phosphate isomerase	GPI	424					25	25	16	58.2	58.2	34.1	63.146	323.31	249620000000	26	803	31.5905	31.5283	31.6425	31.5676	31.8402	31.5514	31.6094	31.6174
	1.2367	-0.475982	A0A2U3TZY2;Q9H078;H0YGM0;A0A2R8Y6R5;F5GX99	A0A2U3TZY2;Q9H078;H0YGM0	Caseinolytic peptidase B protein homolog	CLPB	425					11	11	4	21.1	21.1	5.8	76.852	104.8	2106300000	36	65	25.7084	25.535	24.8278	25.1552	25.69	25.6977	25.8696	25.8729
	0.578466	-0.614209	P56556;A0A2Y9D025;R4GN43	P56556;A0A2Y9D025;R4GN43	NADH dehydrogenase [ubiquinone] 1 alpha subcomplex subunit 6	NDUFA6	426					3	3	3	27.3	27.3	27.3	15.136	12.027	953720000	8	22	26.0074	25.834	23.9007	25.7467	26.0111	26.015	26.1276	25.7919
	0.811889	-0.218902	C9J7T7;A0A384DVL6;C9JE98;C9J0Q5;Q9Y618;C9JQE8;C9JNV9;C9J330	C9J7T7;A0A384DVL6;C9JE98;C9J0Q5;Q9Y618;C9JQE8	Nuclear receptor corepressor 2	NCOR2	427					9	9	9	6.1	6.1	6.1	221	29.114	1081000000	107	50	24.798	25.1079	24.6837	24.4775	24.9353	24.965	25.0596	24.9828
	1.34185	0.994804	A0A384DVU0;Q8IY17	A0A384DVU0;Q8IY17	Neuropathy target esterase	PNPLA6	428					3	3	3	5.1	5.1	5.1	149.92	19.087	189570000	67	12	22.5833	23.9935	24.2096	23.8093	22.9271	22.3437	22.9068	22.4388
	1.27556	0.256586	A0A3B3IRE4;Q8TCE6;Q6NSW5	A0A3B3IRE4;Q8TCE6;Q6NSW5	Protein FAM45A;Protein FAM45B	FAM45A;FAM45B	429					3	3	3	15.9	15.9	15.9	27.769	11.362	669760000	14	20	25.3222	25.1709	25.2106	25.2214	25.1847	25.1006	24.8698	24.7438
	0.215822	-0.034893	A0A3B3IRK6;Q13724;A0A3B3IRW2;A0A3B3IS52;C9JDQ1;A0A3B3ITC1	A0A3B3IRK6;Q13724;A0A3B3IRW2;A0A3B3IS52	Mannosyl-oligosaccharide glucosidase	MOGS	430					7	7	7	14.1	14.1	14.1	78.462	55.61	1472500000	38	34	25.8688	25.9208	25.7988	26.0004	25.9748	25.8061	26.0336	25.9139
	0.0698679	0.134828	A0A3B3IRL2;O75629	A0A3B3IRL2;O75629	Protein CREG1	CREG1	431					1	1	1	8.2	8.2	8.2	28.058	10.771	428590000	11	19	25.5224	25.3979	23.5697	23.995	23.042	24.9276	24.9357	25.0404
	1.45564	-0.402238	F5H345;A0A3B3IRR1;A0A3F2YNY7;P08397;F5GY90;F5H0P4;A0A3B3IU56;A0A1W2PNU5;A0A3B3IU34;F5H226;F5H4W5;F5H4X2	F5H345;A0A3B3IRR1;A0A3F2YNY7;P08397;F5GY90;F5H0P4;A0A3B3IU56;A0A1W2PNU5;A0A3B3IU34;F5H226	Porphobilinogen deaminase	HMBS	433					8	8	8	29.4	29.4	29.4	35.761	24.069	1124600000	17	50	25.1674	24.6622	25.2112	24.9678	25.6416	25.33	25.2986	25.3474
	0.426792	-0.763359	A0A3B3IRR6;A0A3B3IT54;A0A3B3ITA3;Q9H7E9	A0A3B3IRR6;A0A3B3IT54;A0A3B3ITA3;Q9H7E9	UPF0488 protein C8orf33	C8orf33	434					5	5	5	30.1	30.1	30.1	24.465	65.699	743530000	10	13	25.6365	25.5498	22.473	25.7532	25.6403	25.513	25.6087	25.704
	0.981731	-0.23696	C9J3L8;C9J5W0;A0A3B3IRT8;E9PAL7;C9IZQ1;P43307	C9J3L8;C9J5W0;A0A3B3IRT8;E9PAL7;C9IZQ1;P43307	Translocon-associated protein subunit alpha	SSR1	435					2	2	2	8.7	8.7	8.7	29.573	57.411	1818400000	11	23	26.6402	26.9564	27.1137	26.946	26.9826	27.2556	27.0708	27.2951
	0.707391	-0.145592	B4DKB2;A0A3B3ISF9;P42892	B4DKB2;A0A3B3ISF9;P42892	Endothelin-converting enzyme 1	ECE1	437					8	8	8	14.5	14.5	14.5	83.573	30.973	928080000	40	39	25.5952	25.4744	25.2488	25.3306	25.6525	25.5442	25.6536	25.381
	0.762949	0.0745721	A0A7I2V2P6;A0A3B3ISG5;P14735;A0A7I2V3E3;A0A7I2YQV5;A0A7I2V4Q3;A0A7I2V610;A0A7I2V2S1;A0A7I2V3K9;B3KSB8;A0A7I2YQS6;A0A7I2V612;A0A7I2V373;A0A7I2V4A4;A0A7I2V634	A0A7I2V2P6;A0A3B3ISG5;P14735;A0A7I2V3E3;A0A7I2YQV5;A0A7I2V4Q3;A0A7I2V610;A0A7I2V2S1;A0A7I2V3K9;B3KSB8	Insulin-degrading enzyme	IDE	438					30	30	30	40.3	40.3	40.3	113.17	234.42	14231000000	52	273	27.3644	27.3454	27.2002	27.3889	27.2255	27.2443	27.316	27.2148
+	1.75061	-1.74964	Q14181;A0A3B3ITS5;H0YDR7	Q14181;A0A3B3ITS5;H0YDR7	DNA polymerase alpha subunit B	POLA2	444					4	4	4	12.5	12.5	12.5	65.947	27.974	483810000	24	17	23.6698	22.9901	22.5223	24.9713	25.3975	25.0571	25.2265	25.471
	1.65046	-0.427359	A0A3B3ITT5;P47914	A0A3B3ITT5;P47914	60S ribosomal protein L29	RPL29	445					2	2	2	13.8	13.8	13.8	18.512	11.128	13112000000	5	22	29.7028	29.3199	29.1553	29.2366	29.975	29.7902	29.6936	29.6652
	0.00739544	0.0188622	P49841;A0A7I2YQK0;A0A3B3ITW1;A0A7I2V3J4;A0A7I2V3D8;A0A7I2V2N4;A0A7I2V589;A0A7I2V4F3;A0A7I2YQ81;A0A7I2V441;A0A7I2V2V4;A0A7I2V2P8;A0A7I2V5G5;A0A7I2V3T3;A0A7I2V511;A0A7I2V4W7;A0A7I2V4Z1;A0A7I2V3G9;A0A7I2YQG6;A0A7I2V5B3;A0A7I2V5K9	P49841;A0A7I2YQK0;A0A3B3ITW1;A0A7I2V3J4;A0A7I2V3D8	Glycogen synthase kinase-3 beta	GSK3B	446					4	2	2	14.3	10.7	10.7	46.744	17.179	346180000	23	7	25.2526	25.1263	22.8774	25.051	25.1836	22.6407	25.2141	25.1935
	2.05527	-0.140314	A0A3B3ITW3;P28288	A0A3B3ITW3;P28288	ATP-binding cassette sub-family D member 3	ABCD3	447					10	10	10	18.4	18.4	18.4	75.421	33.644	2509300000	40	60	26.1374	26.0282	26.0939	26.1258	26.2937	26.2735	26.1889	26.1905
	0.955496	-1.20308	E9PN17;A0A3B3ITX4;O75964;A0A3B3IRW3	E9PN17;A0A3B3ITX4;O75964	ATP synthase subunit g, mitochondrial	ATP5L	448					3	3	3	46.1	46.1	46.1	8.4518	19.547	740650000	4	16	25.424	24.306	22.8495	25.5534	25.9268	25.8284	25.3076	25.8825
	2.08056	0.306993	A0A3B3ITZ9;Q9Y2W1	A0A3B3ITZ9;Q9Y2W1	Thyroid hormone receptor-associated protein 3	THRAP3	449					24	24	23	26.6	26.6	26.6	103.52	256.04	12664000000	41	267	27.3634	27.4064	27.444	27.2749	27.2429	26.9888	27.1074	26.9216
	2.50725	-0.226441	A0A3B3IU45;P33991;E5RG31;A0A3B3ITP6	A0A3B3IU45;P33991;E5RG31;A0A3B3ITP6	DNA replication licensing factor MCM4	MCM4	451					34	34	1	51.5	51.5	1	91.19	323.31	20077000000	43	359	27.4638	27.6097	27.4013	27.4816	27.7136	27.6717	27.7626	27.7142
	0.0957526	-0.025682	A0A3B3IUA2;B1AHD1;P55769;A0A3B3IRU2;A0A3B3ISH1;A0A3B3ISK4	A0A3B3IUA2;B1AHD1;P55769;A0A3B3IRU2	NHP2-like protein 1;NHP2-like protein 1, N-terminally processed	NHP2L1	452					6	6	6	25.4	25.4	25.4	30.162	61.862	4648000000	12	56	27.1663	27.6211	27.3493	27.301	27.3514	27.3642	27.4514	27.3734
	1.40004	-0.47438	A0A3B3IUB5;Q8TCT9;A0A075B6F6;A0A0S2Z6F0;A0A3B3IT72;A0A0C4DGU3	A0A3B3IUB5;Q8TCT9;A0A075B6F6;A0A0S2Z6F0;A0A3B3IT72	Minor histocompatibility antigen H13	HM13	453					7	7	7	18.6	18.6	18.6	46.313	59.644	2157900000	18	51	25.8534	25.7898	26.3427	26.4133	26.7123	26.694	26.362	26.5284
	0.31419	-0.445691	A0A6Q8PGG0;A0A6Q8PFA9;A0A3B3IUC4;P06280;A0A6Q8PHM8;A0A6Q8PHD1;A0A669KAY7;A0A669KB83;A0A3B3IRU3;V9GYN5	A0A6Q8PGG0;A0A6Q8PFA9;A0A3B3IUC4;P06280;A0A6Q8PHM8;A0A6Q8PHD1	Alpha-galactosidase A	GLA	454					3	3	3	8.8	8.8	8.8	41.378	4.5877	266690000	25	9	23.1477	23.6547	23.4549	22.9769	22.3454	24.662	24.7452	23.2642
	0.702412	-0.139563	A0A3B3IUD7;Q14690	A0A3B3IUD7;Q14690	Protein RRP5 homolog	PDCD11	455					24	24	24	16.9	16.9	16.9	208.83	74.137	3343000000	95	116	25.3906	25.28	25.0956	25.5417	25.465	25.525	25.4167	25.4595
	0.0535085	-0.0474739	A0A3F2YNX7;Q7L5Y1;J3QL99;J3QSB6;J3QL81	A0A3F2YNX7;Q7L5Y1;J3QL99;J3QSB6;J3QL81	Mitochondrial enolase superfamily member 1	ENOSF1	456					2	2	2	8.4	8.4	8.4	53.063	5.0854	132380000	23	6	23.4366	22.4004	23.6924	23.0078	22.9087	23.2767	23.5074	23.0343
	0.0804643	0.0337691	A0A494BZT8;Q9Y6A5;A0A494C117;A0A087WUE2;H0Y8F2;E7EMT0;C9JA91	A0A494BZT8;Q9Y6A5;A0A494C117;A0A087WUE2	Transforming acidic coiled-coil-containing protein 3	TACC3	457					6	6	6	12.1	12.1	12.1	89.871	22.219	733730000	34	33	25.1401	24.7304	24.9001	24.8818	24.5293	25.0876	24.8694	25.0309
+	1.8705	-1.92865	A0A494C1G3;A0A494BZU6;A0A494BZW7;A0A494C0P9;A0A494C1K5;A0A494C0Q2;A0A494C1N1;A0A494C0K5;A0A494C0W0;O95453;H3BRK1;A0A494C156;A0A494C002;A0A494C0Q6;F5H1Z4	A0A494C1G3;A0A494BZU6;A0A494BZW7;A0A494C0P9;A0A494C1K5;A0A494C0Q2;A0A494C1N1;A0A494C0K5;A0A494C0W0;O95453;H3BRK1;A0A494C156;A0A494C002;A0A494C0Q6;F5H1Z4	Poly(A)-specific ribonuclease PARN	PARN	458					8	8	8	19.7	19.7	19.7	52.046	13.424	837800000	20	31	25.2918	23.7775	23.0477	22.8256	25.6752	25.6133	25.7076	25.661
	1.29721	0.223756	A0A494BZW2;E9PEM5;A0A494C1L5;P50851;H0YAC6;A0A494C0R9;A0A3B3IU76;A0A3B3IS13	A0A494BZW2;E9PEM5;A0A494C1L5;P50851;H0YAC6;A0A494C0R9	Lipopolysaccharide-responsive and beige-like anchor protein	LRBA	460					7	7	5	3.8	3.8	2.9	233	13.946	870940000	102	28	24.9933	25.0025	24.8926	24.9742	24.4895	24.7659	24.8173	24.8949
	0.527592	-1.11985	A0A494C017;C9JJV6;C9JZL8;A0A499FIY8;C9JC07;Q96S97	A0A494C017;C9JJV6;C9JZL8;A0A499FIY8;C9JC07;Q96S97	Myeloid-associated differentiation marker	MYADM	461					1	1	1	18.9	18.9	18.9	13.153	26.794	967810000	4	21	25.9195	25.8939	25.903	22.0117	25.7287	26.1742	26.2439	26.0607
	0.816789	-0.184595	H0Y993;A0A494C028;P35659;B4DFG0;H0Y8X0;D6RDA2;A0A494C198;D6R9L5	H0Y993;A0A494C028;P35659;B4DFG0;H0Y8X0;D6RDA2;A0A494C198	Protein DEK	DEK	462					11	11	11	30	30	30	43.247	37.548	6432700000	22	96	27.1042	27.056	27.2359	27.4772	27.5788	27.3556	27.3844	27.2928
	0.506221	-0.668386	A0A494C1G8;A0A494C0Z6;H0Y6K5;A0A494C070;H0Y7L6;Q02447	A0A494C1G8;A0A494C0Z6;H0Y6K5;A0A494C070;H0Y7L6;Q02447	Transcription factor Sp3	SP3	465					1	1	1	11.7	11.7	11.7	15.65	46.785	346970000	6	18	24.2885	24.0331	24.4424	22.2134	23.4945	24.5877	24.9157	24.653
	0.701161	-0.854052	A0A494C0B4;P54725;K7ENJ0;K7ELW1;K7EQ16	A0A494C0B4;P54725;K7ENJ0;K7ELW1	UV excision repair protein RAD23 homolog A	RAD23A	466					7	4	4	28.7	19.5	19.5	30.485	44.183	322090000	10	13	22.4514	24.1197	23.389	24.4647	25.4345	24.3506	24.5202	23.5358
	0.678433	0.552836	A0A494C0L6;C9JGI3;P19971	A0A494C0L6;C9JGI3;P19971	Thymidine phosphorylase	TYMP	468					1	1	1	5.2	5.2	5.2	29.597	3.1594	37150000	14	4	23.3632	23.6883	22.3776	23.5983	22.8067	22.2876	23.3796	22.3422
	1.02834	0.434546	A0A494C0Q8;P06132;H0Y5R6;A0A494C0S8;A0A494BZY8;A0A1B0GVN9;A0A1B0GVZ4;A0A494C085;A0A494C1D8;Q5T446;A0A494C1T3;A0A494C007	A0A494C0Q8;P06132;H0Y5R6;A0A494C0S8;A0A494BZY8;A0A1B0GVN9;A0A1B0GVZ4;A0A494C085;A0A494C1D8;Q5T446	Uroporphyrinogen decarboxylase	UROD	469					4	4	4	21.4	21.4	21.4	36.86	7.7881	457070000	14	15	25.4209	24.9022	24.6711	24.7718	24.1629	24.5055	24.5054	24.854
	1.79056	-0.102396	A0A494C0R8;K7EIG1;I3L2B0;I3L4B5;I3L318;Q9Y5I4	A0A494C0R8;K7EIG1;I3L2B0		CLUH	470					29	29	2	29.3	29.3	2.7	150.46	179.65	6483900000	70	213	25.8145	25.9402	25.8836	25.9204	26.0175	25.9527	25.9993	25.9987
	0.376907	-0.529425	A0A494C1B8;A0A494C0U1;P29144;Q5VZU9;A0A494C1S6;A0A494C1S4;A0A494C0A3;A0A494C159	A0A494C1B8;A0A494C0U1;P29144;Q5VZU9	Tripeptidyl-peptidase 2	TPP2	471					10	10	10	10.5	10.5	10.5	130.29	17.355	725940000	59	28	25.0556	24.6635	22.4013	24.6138	24.9104	24.7969	24.7283	24.4163
	0.454742	-0.598351	A0A494C157;A0A494C1E9;P19838;D6RH30;D6RC45;D6RF93	A0A494C157;A0A494C1E9;P19838;D6RH30;D6RC45	Nuclear factor NF-kappa-B p105 subunit;Nuclear factor NF-kappa-B p50 subunit	NFKB1	473					6	6	6	32.4	32.4	32.4	27.64	23.257	524320000	15	20	22.268	24.7543	24.6475	24.3772	24.5626	24.4518	24.6043	24.8218
	0.0344848	-0.00807095	A0A494C165;P12955;K7ES25;A0A494C194;V9GYE4;V9GYL0	A0A494C165;P12955;K7ES25;A0A494C194	Xaa-Pro dipeptidase	PEPD	474					19	19	19	48.5	48.5	48.5	57.603	236.37	11460000000	25	179	27.2209	27.4159	27.2024	27.2777	27.4037	27.1019	27.3215	27.3223
	2.23998	-0.206698	A0A494C1F2;P35658;A0A0A0MSW3;A0A494BZU9;H0Y837;B7ZAV2;H0YF36;E9PKD2;A0A494C104;A0A494C0Y1	A0A494C1F2;P35658;A0A0A0MSW3	Nuclear pore complex protein Nup214	NUP214	475					26	26	26	19.3	19.3	19.3	212.48	108.09	4910200000	74	157	25.6368	25.589	25.741	25.5812	25.8207	25.7693	25.8596	25.9252
	0.438411	0.111747	A0A494C1K3;P78347;A0A494C0Q7;C9J6M0;A0A087WW90;A0A0D9SF80;A0A494C0I1;A0A494C1N8;Q86UP8;Q6EKJ0	A0A494C1K3;P78347	General transcription factor II-I	GTF2I	477					29	29	29	29.1	29.1	29.1	131.05	241.26	10680000000	56	171	27.7115	27.5116	27.6443	27.2203	27.4755	27.3502	27.4612	27.3537
	1.6101	-0.141629	P26885;A0A494C1N0;F5H0N4	P26885;A0A494C1N0;F5H0N4	Peptidyl-prolyl cis-trans isomerase FKBP2;Peptidyl-prolyl cis-trans isomerase	FKBP2	478					6	6	6	57	57	57	15.649	34.119	2500000000	7	70	26.2165	26.2505	26.0951	26.2592	26.3492	26.2787	26.3413	26.4187
	0.391484	-0.0988116	J3KPS2;A0A494C1T9;Q6ZRV2	J3KPS2;A0A494C1T9;Q6ZRV2	Protein FAM83H	FAM83H	479					8	8	8	14.9	14.9	14.9	96.337	22.5	608140000	50	28	24.5215	24.561	24.8769	24.6157	24.7603	24.9461	24.6744	24.5896
	2.60606	-0.376143	A0A499FI31;Q15020;H0YHU8;A0A494C0L2;F8W667;F8VVK9;F8VZM2	A0A499FI31;Q15020	Squamous cell carcinoma antigen recognized by T-cells 3	SART3	480					19	19	19	25.8	25.8	25.8	111.96	43.681	3020700000	53	91	26.3462	26.1453	26.0802	26.1649	26.4342	26.6606	26.6116	26.5349
	0.219093	-0.184493	A0A7I2YQL3;A0A7P0SXD0;A0A7I2YQQ9;A0A499FIZ0;Q9H7D7;C9JCS7;H0Y917;H0Y9R3	A0A7I2YQL3;A0A7P0SXD0;A0A7I2YQQ9;A0A499FIZ0;Q9H7D7	WD repeat-containing protein 26	WDR26	482					3	3	3	8.1	8.1	8.1	65.287	10.453	280580000	30	14	24.2664	24.1205	23.8031	23.499	24.0796	23.3403	24.2703	24.7368
	0.728121	-0.217413	A0A590UJR3;A0A590UJ21;A0A590UJ50;Q13616;A0A590UK34;A0A0C4DGX4;A0A590UJ56;A0A590UJC4;A0A590UJA0;A0A590UJM8;A0A590UJ97;A0A590UJ59	A0A590UJR3;A0A590UJ21;A0A590UJ50;Q13616;A0A590UK34;A0A0C4DGX4;A0A590UJ56;A0A590UJC4;A0A590UJA0	Cullin-1	CUL1	484					14	14	14	21.2	21.2	21.2	84.571	31.091	1574300000	44	51	25.197	25.2253	24.716	24.8911	25.0204	25.3777	25.1896	25.3113
	1.8083	-0.267035	U3KPX3;A0A590UJ43;P48729;A0A5F9W493;A0A590UJQ7;E5RG27;D6RGE5;A0A590UK94;H0Y9X2;U3KQK7;D6REM4;E7ETM0;Q8N752;U3KQ83	U3KPX3;A0A590UJ43;P48729;A0A5F9W493;A0A590UJQ7;E5RG27;D6RGE5;A0A590UK94	Casein kinase I isoform alpha	CSNK1A1	486					8	8	8	23.6	23.6	23.6	42.451	26.362	1262600000	22	55	25.1312	25.168	24.9092	25.2731	25.3913	25.4312	25.4034	25.3237
	1.46706	0.198958	A0A590UJ73;A0A590UJW4;E7EQB3;Q9BSV6;B0V3J0;A0A0G2JNL0;A0A0G2JNK5	A0A590UJ73;A0A590UJW4;E7EQB3;Q9BSV6;B0V3J0;A0A0G2JNL0;A0A0G2JNK5	tRNA-splicing endonuclease subunit Sen34	TSEN34	487					9	9	9	40.3	40.3	40.3	33.037	43.974	1277500000	17	38	25.4178	25.2996	25.5706	25.2904	25.2341	25.2174	25.2308	25.1003
	0.950538	-0.721313	A0A5F9UN28;A0A590UJB6;Q13303;Q5TG81;C9JQ60;A0A590UJJ4;Q14722	A0A5F9UN28;A0A590UJB6;Q13303;Q5TG81;C9JQ60;A0A590UJJ4;Q14722	Voltage-gated potassium channel subunit beta-2;Voltage-gated potassium channel subunit beta-1	KCNAB2;KCNAB1	488					2	2	2	7.6	7.6	7.6	42.653	6.8717	171970000	19	6	23.2856	23.9602	22.4059	22.8027	23.4067	24.2094	23.6031	24.1205
	0.473787	-0.229084	A0A590UJN8;A0A590UJW0;P20585;A0A590UKC9	A0A590UJN8;A0A590UJW0;P20585;A0A590UKC9	DNA mismatch repair protein Msh3	MSH3	491					3	3	3	3.9	3.9	3.9	119.74	17.808	1202900000	54	10	23.4129	23.6266	23.0344	23.9841	23.7385	23.7142	23.9848	23.5369
	0.729729	1.22591	A0A590UJS4;Q6KC79	A0A590UJS4;Q6KC79	Nipped-B-like protein	NIPBL	492					4	4	4	2.4	2.4	2.4	298.88	5.1886	271750000	123	10	25.73	23.1117	25.4134	22.7274	22.7682	22.3464	23.4975	23.4668
	0.938516	0.112041	A0A590UK01;A0A590UJK4;A0A590UJP7;A0A590UK80;Q13247	A0A590UK01;A0A590UJK4;A0A590UJP7;A0A590UK80;Q13247	Serine/arginine-rich splicing factor 6	SRSF6	493					12	12	8	35.2	35.2	20.5	31.58	40.363	14070000000	15	86	28.2359	28.4804	28.2807	28.326	28.2757	28.1526	28.2611	28.1853
	1.16917	-0.806792	E9PCX7;A0A590UK15;Q13423;A0A590UJM2;A0A590UK29;A0A590UJI3;D6RCR6;D6RHU2;A0A590UJA4;A0A590UKC7;D6RAI5	E9PCX7;A0A590UK15;Q13423;A0A590UJM2;A0A590UK29;A0A590UJI3	NAD(P) transhydrogenase, mitochondrial	NNT	494					4	4	4	6.1	6.1	6.1	99.728	13.99	985480000	39	12	24.7771	23.3297	23.419	23.4177	24.7271	24.2626	24.6618	24.5193
	0.485482	0.658258	A0A804H2H4;H0YF16;A0A5F9UK94;H0Y360;Q01433;A0A804CCZ3;A0A7P0TB79;A0A590UJX5;A0A590UK85;A0A7P0Z4H6	A0A804H2H4;H0YF16;A0A5F9UK94;H0Y360;Q01433;A0A804CCZ3	AMP deaminase 2	AMPD2	495					3	3	3	5.9	5.9	5.9	72.422	3.5504	166970000	24	12	23.9346	24.5566	23.6339	23.4653	21.7839	23.7198	23.0023	24.4514
	0.751335	-0.159947	A0A5F9UP49;Q9BRK5;A0A5F9UJX7;H0Y3T6;G3V1E2	A0A5F9UP49;Q9BRK5;A0A5F9UJX7;H0Y3T6;G3V1E2	45 kDa calcium-binding protein	SDF4	496					9	9	9	37.2	37.2	37.2	40.936	40.616	2332000000	17	72	25.406	25.6705	25.5863	25.517	25.902	25.4803	25.6726	25.7647
	0.954122	-0.10606	A0A5H1ZRP2;A0A5F9UY30;O43493	A0A5H1ZRP2;A0A5F9UY30;O43493	Trans-Golgi network integral membrane protein 2	TGOLN2	497					7	7	7	17.3	17.3	17.3	51.018	37.631	1073500000	26	48	25.3685	25.267	25.2353	25.239	25.3261	25.3932	25.5135	25.3011
	0.82621	-1.38155	A0A5F9YFS9;C9JBL1;Q9Y6A9	A0A5F9YFS9;C9JBL1;Q9Y6A9	Signal peptidase complex subunit 1	SPCS1	498					2	2	2	26.5	26.5	26.5	11.805	7.5721	950940000	2	25	22.4584	25.929	23.1983	24.8949	26.1825	25.4031	25.5611	24.86
	0.202137	-0.269656	A0A5F9ZH79;A0A5F9ZHP1	A0A5F9ZH79;A0A5F9ZHP1			499					2	2	2	6.3	6.3	6.3	36.876	2.3122	108430000	17	5	22.3745	24.1186	23.3871	22.9754	24.1981	23.8275	22.431	23.4777
	2.1497	-0.433908	A0A5F9ZHB6;P49642;F8VNY2;F8VSB2;A0A3B3ITS8;H0YIP2	A0A5F9ZHB6;P49642;F8VNY2	DNA primase small subunit;DNA primase	PRIM1	500					6	6	6	17.2	17.2	17.2	54.082	23.296	1235100000	30	42	24.5964	24.928	25.0602	24.7788	25.3107	25.3225	25.3182	25.1478
	0.929503	-0.0656152	A0A5F9ZHM4;P07195;A0A3B3IS95;A8MW50;C9J7H8;F5H793	A0A5F9ZHM4;P07195;A0A3B3IS95;A8MW50	L-lactate dehydrogenase B chain;L-lactate dehydrogenase	LDHB	501					17	16	16	57.8	54.3	54.3	37.294	323.31	187420000000	17	430	31.2452	31.2422	31.3125	31.272	31.4064	31.3632	31.3033	31.2614
	0.0838831	-0.0622864	E9PGZ4;A0A5F9ZHN7;Q9NTJ5;C9JV50;F8WDN7	E9PGZ4;A0A5F9ZHN7;Q9NTJ5;C9JV50	Phosphatidylinositide phosphatase SAC1	SACM1L	502					7	7	7	17.4	17.4	17.4	55.571	11.282	473690000	27	21	24.1425	24.0085	24.594	24.8899	24.9212	24.477	24.4196	24.0662
	0.197924	0.0368361	P51648;A0A5F9ZHN9;A0A5F9ZGX4;A0A5F9ZHI5;J3QRD1;A0A5K1VW72;A0A5F9ZI12;A0A5F9ZHZ9;I3L1M4;A0A5F9ZHP6;J3KTG1;I3L0X1;J3QS00;J3QKK9;A0A0D9SGC3;J3KTD9;I3L2W1;K7EN73;J3QQV9;I3L4G6	P51648;A0A5F9ZHN9;A0A5F9ZGX4;A0A5F9ZHI5;J3QRD1;A0A5K1VW72;A0A5F9ZI12	Fatty aldehyde dehydrogenase	ALDH3A2	503					23	22	22	48.2	45.8	45.8	54.847	277.95	13101000000	22	191	27.5064	27.4629	27.1862	27.3408	27.3195	27.3456	27.3063	27.3776
	0.698203	-0.379643	E9PQY3;A0A5F9ZHR7;P11117;E9PHY0;B7Z7D2;A0A5F9ZH82;A0A5F9ZI20;A0A5F9ZH40;B7Z6U3	E9PQY3;A0A5F9ZHR7;P11117;E9PHY0;B7Z7D2;A0A5F9ZH82	Lysosomal acid phosphatase	ACP2	504					4	4	4	12.4	12.4	12.4	45.306	4.6874	150980000	18	10	23.1149	23.831	23.7409	23.2039	23.4514	23.9038	23.7024	24.3517
	0.576007	-0.367671	P49643;A0A5F9ZHU7;A0A5F9ZHR0	P49643;A0A5F9ZHU7;A0A5F9ZHR0	DNA primase large subunit	PRIM2	506					5	5	5	14.9	14.9	14.9	58.805	8.8055	232940000	28	20	23.3817	24.2427	23.5443	23.161	23.8146	23.6282	23.8673	24.4902
	0.601859	-0.24972	A0A804HJF6;A0A5F9ZHX8;F5H324;A0A804HIF5;A0A804HJ07;A0A5F9ZHZ5;F5GYY5;P51690;A0A804HHU6;A0A5F9ZHU0;C9J5G7;A0A804HIX6;A0A804HK35;Q5FYA8;P51689	A0A804HJF6;A0A5F9ZHX8;F5H324;A0A804HIF5;A0A804HJ07;A0A5F9ZHZ5;F5GYY5;P51690;A0A804HHU6	Arylsulfatase E	ARSE	508					5	5	5	17.2	17.2	17.2	44.365	22.005	689380000	21	33	24.7076	24.9414	24.1603	24.5816	24.9638	24.5577	24.8169	25.0513
	0.0632583	-0.185396	A0A5F9ZHY7;Q8WY22	A0A5F9ZHY7;Q8WY22	BRI3-binding protein	BRI3BP	509					2	2	2	12.8	12.8	12.8	31.26	44.614	855290000	9	18	22.9699	25.7468	25.7601	25.5725	25.8602	22.844	26.0284	26.0582
+	3.40023	-0.368742	A0A5F9ZI39;P23458;A0A5F9ZH07;A0A5F9ZHN8;A0A5F9ZHW0;A0A5F9ZH32;A0A5F9ZI01	A0A5F9ZI39;P23458;A0A5F9ZH07;A0A5F9ZHN8;A0A5F9ZHW0	Tyrosine-protein kinase JAK1	JAK1	512					5	5	5	5.4	5.4	5.4	133.06	3.289	5487300000	62	12	28.8641	28.8696	28.8291	28.9759	29.3512	29.2079	29.2885	29.1661
	0.623375	-0.681977	E9PJK2;A0A5F9ZI63;O75530	E9PJK2;A0A5F9ZI63;O75530	Polycomb protein EED	EED	513					1	1	1	3.6	3.6	3.6	40.634	3.4728	208090000	19	12	23.1328	23.834	23.6671	23.2347	24.8386	24.5986	24.4697	22.6895
	0.0861248	-0.0132565	A0A5H1ZRP4;Q8WX92	A0A5H1ZRP4;Q8WX92	Negative elongation factor B	NELFB	514					9	9	9	20.2	20.2	20.2	70.038	13.349	571660000	32	23	24.7033	24.6359	24.7457	24.6321	24.7675	24.7618	24.5594	24.6813
	1.46848	-0.351278	A0A5H1ZRS1;Q15154;A0A4W8VX11;E7EV93;H0YBA1;E5RGQ4;E9PGW9	A0A5H1ZRS1;Q15154;A0A4W8VX11	Pericentriolar material 1 protein	PCM1	515					19	19	19	11.9	11.9	11.9	227.73	40.874	1831700000	86	64	25.8251	25.5377	25.5481	25.3279	25.9556	25.6982	26.0722	25.9179
	1.62439	-0.233305	A0A5K1VW95;P40925;B9A041;B8ZZ51;C9JF79;C9JRL4;C9JLV6	A0A5K1VW95;P40925;B9A041;B8ZZ51;C9JF79	Malate dehydrogenase, cytoplasmic;Malate dehydrogenase	MDH1	517					8	8	8	27.8	27.8	27.8	38.507	155.27	26823000000	14	109	29.5298	29.2124	29.4657	29.2722	29.5917	29.6407	29.5659	29.6151
	0.691236	-0.461134	H0Y818;A0A669KAW3;P40692;A0A669KBB4;A0A669KBK2;E7EUC9;A0A087WX20;A0A669KB03;H0Y806;H0Y5L7	H0Y818;A0A669KAW3;P40692;A0A669KBB4;A0A669KBK2;E7EUC9;A0A087WX20;A0A669KB03	DNA mismatch repair protein Mlh1	MLH1	518					6	6	6	14.4	14.4	14.4	75.747	23.791	488460000	47	18	24.3723	23.2912	24.434	24.7328	24.6453	24.5237	24.6435	24.8625
+	3.25275	1.08007	A0A669KAX3;O76024;A0A804HIL0;A0A804HKM5;A0A804HK77;A0A804HIL2;A0A669KBF0;H0Y9G5	A0A669KAX3;O76024;A0A804HIL0;A0A804HKM5;A0A804HK77;A0A804HIL2	Wolframin	WFS1	519					3	3	3	3.9	3.9	3.9	101.54	3.9693	686920000	37	12	25.3966	25.3736	25.5096	25.6134	24.29	24.8337	24.3201	24.129
	0.0572344	-0.00517607	Q13620;A0A7P0T954;K4DI93;A0A669KAX4;A0A7P0TAQ3;A0A7P0T9L3;A0A7P0T9C8;A0A7P0T8P8;A0A804CL36;A0A7P0T9D0;A0A669KBG9;A0A7P0T9P5;A0A7P0TAF9;A0A7P0T9R8;A0A7P0Z4G9;A0A7P0T8W4;A0A669KAU9;A0A7P0Z439;A0A7P0Z4E4	Q13620;A0A7P0T954;K4DI93;A0A669KAX4;A0A7P0TAQ3;A0A7P0T9L3;A0A7P0T9C8;A0A7P0T8P8;A0A804CL36;A0A7P0T9D0;A0A669KBG9;A0A7P0T9P5;A0A7P0TAF9	Cullin-4B	CUL4B	520					26	26	19	32.3	32.3	24.2	103.98	124.48	4894400000	56	169	25.633	25.7234	25.673	25.7789	25.7176	25.6951	25.7064	25.7098
	0.410138	-0.110462	C9IYK6;C9JTE9;A0A669KBH7;A0A669KB27;A0A669KAY5;Q9UHQ4;C9JGJ9;F8WB99;H7C5E2;C9JP06;F8WDG1;B7Z2L0;H0Y7N8	C9IYK6;C9JTE9;A0A669KBH7;A0A669KB27;A0A669KAY5;Q9UHQ4;C9JGJ9;F8WB99;H7C5E2	B-cell receptor-associated protein 29	BCAP29	521					3	3	3	19.9	19.9	19.9	22.933	8.0438	452860000	11	24	24.7232	24.5822	24.2985	24.5475	24.5299	24.6204	24.8805	24.5624
+	3.61663	-0.338319	A0A669KB05;C9JZR2;H0YC95;O60716;A0A669KB62;A0A804HIL4;A0A804HK15;A0A804HJM1;E9PKY0	A0A669KB05;C9JZR2;H0YC95;O60716;A0A669KB62	Catenin delta-1	CTNND1	522					29	29	29	40.7	40.7	40.7	102.29	323.31	12922000000	48	269	26.7352	26.7204	26.681	26.5942	27.0966	26.9847	27.0403	26.9625
	0.691331	-0.144882	Q92538;A0A7I2YQM2;A0A669KBG8;A0A7I2V2L5;A0A7I2YQ65;A0A7P0RGV0;A0A669KB10;A0A7I2V452;A0A7I2V514;A0A7I2V529;A0A7I2V4K2;A0A7I2V3Y5;A0A7I2V2L4;A0A7I2YQM0;A0A7I2V5C9;A0A7I2V2U1;A0A7I2V4H1;A0A7I2V4F1;A0A7I2V2I0;A0A7I2V5V9;A0A7I2V2F8;A0A7I2V3Q4;A0A7I2V3J0;A0A7I2V342;A0A7I2V3E5;A0A7I2YQN6;A0A7I2V5Z2;A0A7I2V4N5;A0A7I2V350;A0A7I2V2Q1;A0A7I2V3R2;A0A7I2V4L8;A0A7I2V4M6;A0A7I2YQE0;A0A7I2V5T8;A0A7I2YQ62;A0A7I2Y…	Q92538;A0A7I2YQM2;A0A669KBG8;A0A7I2V2L5;A0A7I2YQ65;A0A7P0RGV0;A0A669KB10;A0A7I2V452;A0A7I2V514;A0A7I2V529;A0A7I2V4K2;A0A7I2V3Y5;A0A7I2V2L4	Golgi-specific brefeldin A-resistance guanine nucleotide exchange factor 1	GBF1	523					18	18	18	14.6	14.6	14.6	206.44	40.56	1556100000	90	75	24.6326	24.8176	25.0753	24.6817	24.9916	24.971	24.9297	24.8944
	0.545301	-1.05357	A0A669KB29;Q9P0U4;K7EJR0;K7EQZ1;K7EQ21;K7EKZ6	A0A669KB29;Q9P0U4;K7EJR0;K7EQZ1;K7EQ21	CXXC-type zinc finger protein 1	CXXC1	524					4	4	4	6.2	6.2	6.2	74.622	2.469	202100000	27	5	23.3407	21.8458	24.0243	23.5273	25.3372	22.3658	23.6213	25.6281
+	3.73673	-0.409247	A0A669KB68;A0A669KB56;A0A669KBA4;A0A669KB53;P42224;J3KPM9;A0A669KBI6;A0A669KB52;A0A669KB75;E7EPD2;A0A669KB17;D2KFR9;E7ENM1;E9PH66;Q67C41;A0A669KBK4	A0A669KB68;A0A669KB56;A0A669KBA4;A0A669KB53;P42224;J3KPM9;A0A669KBI6;A0A669KB52;A0A669KB75	Signal transducer and activator of transcription 1-alpha/beta;Signal transducer and activator of transcription	STAT1	525					24	24	24	39.7	39.7	39.7	87.03	277.24	9418000000	39	204	26.7934	26.864	26.8162	26.8478	27.1298	27.19	27.3157	27.3229
	1.06904	-0.960825	A0A669KBF5;A0A669KBE6;Q9NV96;A0A669KBA0;A0A669KB92;Q3MIR4	A0A669KBF5;A0A669KBE6;Q9NV96	Cell cycle control protein 50A	TMEM30A	526					3	3	3	12.8	12.8	12.8	32.514	6.5884	334790000	13	17	23.0519	24.6047	22.4577	23.5669	24.429	24.0758	24.5243	24.4953
	0.0582547	-0.0114803	A0A669KBJ7;Q9H2P0;A0A2R8Y6X0;A0A2R8YCL6	A0A669KBJ7;Q9H2P0;A0A2R8Y6X0	Activity-dependent neuroprotector homeobox protein	ADNP	527					14	14	14	14.9	14.9	14.9	131.49	41.467	2098700000	61	67	25.4256	25.4414	25.6982	25.6025	25.5319	25.5376	25.6223	25.5218
	1.15077	-0.156647	A0A669KBL1;Q93009;H3BND8;F5H2X1;H3BRA2;H3BUV0;H3BTM1;H3BQD1;I3L2D8	A0A669KBL1;Q93009;H3BND8;F5H2X1	Ubiquitin carboxyl-terminal hydrolase 7;Ubiquitin carboxyl-terminal hydrolase	USP7	528					37	37	37	41.7	41.7	41.7	132.33	206.34	7299000000	64	217	25.8974	26.0447	25.8284	26.0456	26.0698	26.0245	26.1094	26.239
	2.93377	-0.315166	A0A6I8PL42;A0A6I8PIT3;A0A6I8PIV1;Q9P2J5;A0A6I8PRS0;B4DER1;A0A6I8PS05;A0A6I8PLB8;A0A6I8PLB3;A0A6I8PIP7;A0A6I8PTV8;A0A6I8PRU9;A0A6I8PRP1	A0A6I8PL42;A0A6I8PIT3;A0A6I8PIV1;Q9P2J5;A0A6I8PRS0;B4DER1;A0A6I8PS05;A0A6I8PLB8;A0A6I8PLB3;A0A6I8PIP7;A0A6I8PTV8	Leucine--tRNA ligase, cytoplasmic	LARS	529					40	40	40	44.6	44.6	44.6	129.21	245.27	9711500000	60	271	26.3197	26.427	26.2195	26.3946	26.6479	26.5769	26.7082	26.6885
	1.19061	0.537625	A0A6I8PIX7;O95425;A0A0J9YWY6;A0A6I8PL75	A0A6I8PIX7;O95425;A0A0J9YWY6	Supervillin	SVIL	530					5	5	5	3.3	3.3	3.3	213.63	26.553	294400000	102	20	24.7307	24.4395	23.6779	24.138	23.6796	23.6912	23.9188	23.5459
+	3.0891	-1.77709	A0A6I8PS19;A0A6I8PL80;Q9NVN8	A0A6I8PS19;A0A6I8PL80;Q9NVN8	Guanine nucleotide-binding protein-like 3-like protein	GNL3L	531					4	4	4	13	13	13	58.012	6.3929	341780000	29	6	22.5608	22.4286	22.749	23.6683	24.5051	24.5731	24.795	24.6418
	1.1376	-0.163699	Q99615;A0A6I8PU73;A0A6I8PUD4;A0A6I8PS32;A0A6I8PIK4;A0A6I8PR89;A0A6I8PRZ0;A0A6I8PLE7;A0A6I8PU89;A0A6I8PUC2;K7ER44;K7EIH8;K7EPP7;K7EK03;K7ESP1;K7EJV7;K7EN19;K7EJL5;K7ELJ8;K7EJE9;A0A6I8PR93	Q99615;A0A6I8PU73;A0A6I8PUD4;A0A6I8PS32;A0A6I8PIK4;A0A6I8PR89;A0A6I8PRZ0;A0A6I8PLE7;A0A6I8PU89;A0A6I8PUC2;K7ER44;K7EIH8;K7EPP7;K7EK03	DnaJ homolog subfamily C member 7	DNAJC7	533					20	20	20	42.1	42.1	42.1	56.44	76.499	4959000000	32	97	26.1314	26.0967	26.3632	26.1517	26.3619	26.279	26.2841	26.4729
	1.58819	-0.2059	A0A6Q8KRG2;Q08379;A0A1W2PQY5;A0A087WYC0;H0Y7B8;B7ZC06	A0A6Q8KRG2;Q08379;A0A1W2PQY5	Golgin subfamily A member 2	GOLGA2	535					11	11	11	15.8	15.8	15.8	111.66	56.606	1106400000	45	47	24.6632	24.4563	24.5591	24.5619	24.7745	24.6175	24.8878	24.7843
	0.176129	-0.206817	A0A6Q8PEV5;A0A6Q8PH03;A0A7I2SYM4;A0A6Q8PFB5;A0A6Q8PF12;Q9BYV8;A0A6Q8PGR4;A0A6Q8PFB1;A0A6Q8PGX0;A0A7I2PK71;C9J6R3;A0A6Q8PG60;F8WAV3;A0A6Q8PH12;A0A6Q8PHU1;C9JCX6	A0A6Q8PEV5;A0A6Q8PH03;A0A7I2SYM4;A0A6Q8PFB5;A0A6Q8PF12;Q9BYV8;A0A6Q8PGR4;A0A6Q8PFB1;A0A6Q8PGX0;A0A7I2PK71	Centrosomal protein of 41 kDa	CEP41	536					5	5	5	22.7	22.7	22.7	39.488	11.064	502160000	18	18	24.3836	23.6314	24.4081	24.1417	23.2668	24.4966	24.3207	25.3081
	0.564818	-1.00236	O95163;A0A6Q8PHC9;A0A6Q8PHF4;A0A6Q8PG86;A0A6Q8PEX6;A0A6Q8PFB7;A0A6Q8PFH9;A0A6Q8PHI5;A0A6Q8PF66;A0A6Q8PFN8;A0A6Q8PH48;A0A6Q8PGW3;A0A6Q8PF69;A0A6Q8PGR0;A0A6Q8PHA0;F5H2T0;A0A6Q8PGA6;A0A6Q8PFC8;A0A6Q8PGC4;A0A6Q8PH36;H0YDF3;A0A6Q8PFX1	O95163;A0A6Q8PHC9;A0A6Q8PHF4;A0A6Q8PG86;A0A6Q8PEX6;A0A6Q8PFB7;A0A6Q8PFH9;A0A6Q8PHI5;A0A6Q8PF66;A0A6Q8PFN8;A0A6Q8PH48;A0A6Q8PGW3;A0A6Q8PF69;A0A6Q8PGR0;A0A6Q8PHA0;F5H2T0;A0A6Q8PGA6	Elongator complex protein 1	IKBKAP	537					10	10	10	11.3	11.3	11.3	150.25	22.155	1433300000	63	21	26.2153	23.0803	26.4888	26.4355	26.7171	26.5986	26.4939	26.4197
	0.544714	0.405582	A0A6Q8PFF7;A0A6Q8PG30;A0A6Q8PHQ1;A0A6Q8PEZ7;Q96S66;A0A6Q8PG75;A0A6Q8PGA4;A0A6Q8PG14;A0A6Q8PG68;A0A6Q8PF11;Q5T1P5	A0A6Q8PFF7;A0A6Q8PG30;A0A6Q8PHQ1;A0A6Q8PEZ7;Q96S66;A0A6Q8PG75;A0A6Q8PGA4;A0A6Q8PG14	Chloride channel CLIC-like protein 1	CLCC1	539					4	4	4	15.1	15.1	15.1	48.477	35.439	345940000	25	17	24.2438	24.7717	24.0473	24.1665	24.1881	24.3196	22.9914	24.1078
	4.43383	-0.24428	P49588;A0A6Q8PGN5;A0A6Q8PF33;H3BPK7;A0A6Q8PFY2;A0A6Q8PGE8;A0A6Q8PGR9;A0A6Q8PGB5;A0A6Q8PFK3;A0A6Q8PHJ2;A0A6Q8PH44;A0A6Q8PHP7;A0A6Q8PHP3;A0A6Q8PF77;A0A6Q8PG28;A0A6Q8PG62;A0A6Q8PGI8;A0A6Q8PHN5	P49588;A0A6Q8PGN5;A0A6Q8PF33;H3BPK7;A0A6Q8PFY2;A0A6Q8PGE8;A0A6Q8PGR9;A0A6Q8PGB5;A0A6Q8PFK3;A0A6Q8PHJ2;A0A6Q8PH44;A0A6Q8PHP7	Alanine--tRNA ligase, cytoplasmic	AARS	541					37	37	37	58.1	58.1	58.1	106.81	323.31	34937000000	51	485	28.3821	28.3772	28.3028	28.3106	28.5664	28.5861	28.6033	28.594
	0.610493	-0.947018	A0A6Q8PF35;F8VUA2;F8VVT7;A0A6Q8PG85;F5H875;Q9HD42;A0A6Q8PGM8;A0A6Q8PFF9;A0A6Q8PFX8;A0A6Q8PHU0	A0A6Q8PF35;F8VUA2;F8VVT7;A0A6Q8PG85;F5H875;Q9HD42;A0A6Q8PGM8;A0A6Q8PFF9	Charged multivesicular body protein 1a	CHMP1A	542					3	3	3	16.2	16.2	16.2	16.84	2.6967	286080000	8	10	22.978	23.7206	23.0627	23.6271	22.2038	25.0483	24.6292	25.2952
	0.259535	0.0373368	A0A6Q8PF94;O15344;C9J453;A0A087X255;A0A6Q8PGA5;A0A6Q8PGE7	A0A6Q8PF94;O15344;C9J453;A0A087X255	E3 ubiquitin-protein ligase Midline-1	MID1	543					18	18	18	27.9	27.9	27.9	81.507	223.65	7190000000	31	158	26.6252	26.6022	26.4834	26.5738	26.5853	26.554	26.6087	26.3872
	0.14158	0.0646424	A0A6Q8PFA6;A0A6Q8PH57;A0A6Q8PGH7;A0A6Q8PG37;O00139;D6R9M0;A0A6Q8PGG1	A0A6Q8PFA6;A0A6Q8PH57;A0A6Q8PGH7;A0A6Q8PG37;O00139;D6R9M0;A0A6Q8PGG1	Kinesin-like protein KIF2A	KIF2A	544					9	9	9	14.4	14.4	14.4	78.042	17.743	665800000	34	27	24.7631	24.0931	24.7872	24.6045	24.563	24.6416	24.3924	24.3924
	0.22759	-0.0405636	A0A7I2PK44;A0A6Q8PG15;A0A6Q8PFE1;O95831;A0A6Q8PHC0;A0A6Q8PHJ9;A0A6Q8PFM5;A0A6Q8PFQ8;A0A6Q8PFS4;A0A6Q8PFA7;A0A7I2RLJ8;E9PMA0;A0A6Q8PFW2;A0A6Q8PHJ4;A0A6Q8PF87;A0A6Q8PFN1	A0A7I2PK44;A0A6Q8PG15;A0A6Q8PFE1;O95831;A0A6Q8PHC0;A0A6Q8PHJ9;A0A6Q8PFM5;A0A6Q8PFQ8;A0A6Q8PFS4;A0A6Q8PFA7;A0A7I2RLJ8;E9PMA0	Apoptosis-inducing factor 1, mitochondrial	AIFM1	547					19	19	19	42.2	42.2	42.2	66.673	228.81	13487000000	31	209	27.5696	27.8352	27.515	27.6859	27.7169	27.6827	27.7019	27.6665
	0.0880168	0.0279946	B4DIH2;A0A7I2RYU0;A0A6Q8PFG4;A0A6Q8PH79;A0A6Q8PGL3;A0A6Q8PGS2;Q8TB36;A0A6Q8PGU0;A0A6Q8PEZ4;A0A6Q8PFF4;A0A6Q8PHC1;A0A6Q8PH97;A0A6Q8PEX8;A0A6Q8PH88;A0A6Q8PHN7	B4DIH2;A0A7I2RYU0;A0A6Q8PFG4;A0A6Q8PH79;A0A6Q8PGL3;A0A6Q8PGS2;Q8TB36;A0A6Q8PGU0;A0A6Q8PEZ4	Ganglioside-induced differentiation-associated protein 1	GDAP1	548					3	3	3	16.1	16.1	16.1	28.768	9.6658	443330000	10	18	24.3543	24.4144	24.292	24.3764	24.0059	24.385	24.4101	24.5242
+	2.22035	-1.76068	A0A6Q8PG51;A0A6Q8PHJ5;A0A6Q8PGP5;A0A6Q8PFI7;Q96PU5;A0A6Q8PG81;A0A7P0Z498;K7ERN1;A0A1B0GVY1;H0Y8H4	A0A6Q8PG51;A0A6Q8PHJ5;A0A6Q8PGP5;A0A6Q8PFI7;Q96PU5;A0A6Q8PG81;A0A7P0Z498;K7ERN1;A0A1B0GVY1	E3 ubiquitin-protein ligase NEDD4-like	NEDD4L	549					4	2	2	4.6	2.1	2.1	99.656	6.4668	286860000	41	13	23.1692	24.1476	23.7376	22.2589	25.0703	24.7759	25.2669	25.2429
	2.85748	0.109544	A0A6Q8PFJ0;P02545;A0A804HL68;A0A6Q8PHQ9;A0A6Q8PF80;A0A6Q8PGH0;A0A6Q8PFM1;A0A6Q8PF59;A0A6Q8PFF5	A0A6Q8PFJ0;P02545;A0A804HL68;A0A6Q8PHQ9;A0A6Q8PF80	Prelamin-A/C;Lamin-A/C	LMNA	550					43	43	4	60.1	60.1	12.9	80.902	323.31	151080000000	44	632	29.8095	29.7837	29.827	29.8631	29.7119	29.7156	29.7337	29.6839
	0.418316	0.079742	Q6UWE0;A0A6Q8PGT8;A0A6Q8PGB2;A0A6Q8PG02;A0A6Q8PGW1;A0A6Q8PFT9;A0A6Q8PFL5;A0A6Q8PGF7;A0A6Q8PFW1;A0A6Q8PH70;A0A6Q8PFI6;A0A6Q8PHH6;A0A6Q8PFL1;A0A6Q8PF55;A0A6Q8PGZ2;A0A6Q8PG90;A0A6Q8PGH9	Q6UWE0;A0A6Q8PGT8;A0A6Q8PGB2;A0A6Q8PG02;A0A6Q8PGW1;A0A6Q8PFT9;A0A6Q8PFL5;A0A6Q8PGF7;A0A6Q8PFW1;A0A6Q8PH70;A0A6Q8PFI6;A0A6Q8PHH6	E3 ubiquitin-protein ligase LRSAM1	LRSAM1	551					7	7	7	16.5	16.5	16.5	83.593	28.73	1141900000	41	50	25.3675	25.3978	25.2329	25.3682	25.4269	25.0942	25.3467	25.1796
	3.54725	-0.181961	A0A6Q8PFU3;P43034;A0A6Q8PG63;A0A6Q8PFT2;A0A6Q8PH33;I3L495;I3L3N5	A0A6Q8PFU3;P43034;A0A6Q8PG63;A0A6Q8PFT2	Platelet-activating factor acetylhydrolase IB subunit alpha	PAFAH1B1	553					14	14	14	36	36	36	48.77	209.57	4692500000	25	81	26.9526	26.9351	26.9729	27.0185	27.1696	27.1552	27.1768	27.1053
	0.250589	0.100924	A0A6Q8PFY7;Q92734;A0A6Q8PFC4;A0A6Q8PH89;A0A6Q8PH27;A0A6Q8PG00;A0A6Q8PG04;A0A6Q8PGS4;A0A6Q8PF40;C9JJP5;C9JUE0;C9JTY3;A0A6Q8PF51	A0A6Q8PFY7;Q92734;A0A6Q8PFC4;A0A6Q8PH89;A0A6Q8PH27;A0A6Q8PG00;A0A6Q8PG04;A0A6Q8PGS4;A0A6Q8PF40;C9JJP5;C9JUE0;C9JTY3;A0A6Q8PF51	Protein TFG	TFG	554					11	11	11	38.8	38.8	38.8	44.267	190.66	4241600000	15	95	26.7936	27.2437	26.6909	26.7964	26.4587	26.9218	26.8406	26.8998
	1.76994	-0.170038	P41250;A0A6Q8PGA8;A0A6Q8PGI6;A0A6Q8PGZ8;A0A6Q8PHH9;A0A6Q8PGW4;A0A6Q8PHI7;H7C443;A0A6Q8PFZ6;A0A6Q8PF45;A0A6Q8PH49;A0A6Q8PGN7;F8WCK4;A0A6Q8PGZ9;A0A6Q8PFV5;A0A6Q8PFU7;A0A6Q8PGT3	P41250;A0A6Q8PGA8;A0A6Q8PGI6;A0A6Q8PGZ8;A0A6Q8PHH9;A0A6Q8PGW4;A0A6Q8PHI7;H7C443;A0A6Q8PFZ6	Glycine--tRNA ligase	GARS	555					27	27	27	46.7	46.7	46.7	83.165	323.31	18468000000	40	258	27.8277	27.7341	27.7005	27.7252	27.7877	27.9453	27.9518	27.9829
	2.52205	-0.12441	A0A6Q8PGB0;P24928	A0A6Q8PGB0;P24928	DNA-directed RNA polymerase II subunit RPB1	POLR2A	556					13	13	13	9	9	9	217.24	32.117	1435900000	96	75	25.1092	25.1726	25.1531	25.1129	25.3082	25.2655	25.2648	25.2069
	1.64753	-0.474256	A0A6Q8PHK0;A0A6Q8PGG9;Q14669;H7C2Y1;G5E9G6;C9JLJ5;C9JSX9;C9JLD7;H7C1L9	A0A6Q8PHK0;A0A6Q8PGG9;Q14669	E3 ubiquitin-protein ligase TRIP12	TRIP12	558					16	16	16	10.4	10.4	10.4	228.48	30.309	1683000000	101	59	25.9044	25.3404	25.7419	25.4338	26.2596	26.1659	25.887	26.0051
	1.0003	0.121376	P20810;A0A6Q8PH20;A0A6Q8PGN6;B7Z574;E7EVY3;E7ES10;A0A6Q8PFE5;A0A0C4DGB5;A0A6Q8PG72;E9PCH5;A0A6Q8PGG5;E9PDE4;A0A6Q8PFF6;H0Y9H6;H0Y7F0;E7EQ12;E7EQA0;H0YD33;F8W7E0;E9PSG1;H0YA91;A0A6Q8PFL0;A0A0C4DGD1;D6RC54;H0Y944;D6RAA8;E7EQK6;A0A6Q8PFR3;D6RBR1	P20810;A0A6Q8PH20;A0A6Q8PGN6;B7Z574;E7EVY3;E7ES10;A0A6Q8PFE5;A0A0C4DGB5;A0A6Q8PG72;E9PCH5;A0A6Q8PGG5;E9PDE4;A0A6Q8PFF6;H0Y9H6;H0Y7F0;E7EQ12;E7EQA0;H0YD33	Calpastatin	CAST	559					27	27	27	44.8	44.8	44.8	76.572	323.31	28805000000	33	336	28.8015	28.8485	28.8972	28.6378	28.676	28.637	28.7508	28.6356
	0.15205	-0.0405893	A0A6Q8PGU6;Q8NB90	A0A6Q8PGU6;Q8NB90	Spermatogenesis-associated protein 5	SPATA5	560					10	9	9	20.2	18.9	18.9	100.35	46.047	597930000	50	20	24.8712	24.6919	24.4948	24.8619	24.7257	24.6967	24.9203	24.7394
	0.741672	-0.201316	A0A6Q8PH09;Q9NVI1;A0A6Q8PGF4;H3BP78;F8W7R3;H3BS60;H3BQE2;H3BT54;H3BMG4	A0A6Q8PH09;Q9NVI1;A0A6Q8PGF4;H3BP78;F8W7R3	Fanconi anemia group I protein	FANCI	561					13	13	13	12.3	12.3	12.3	154.37	30.287	1548300000	82	38	26.5343	26.5973	26.3305	26.8179	27.0049	26.6959	26.7902	26.5943
	0.675493	-0.102738	Q27J81;A0A6Q8PHA2;A0A6Q8PH71;A0A6Q8PHG2;A0A6Q8PGN3;A0A6Q8PF44;A0A6Q8PFW4;A0A6Q8PH25;A0A6Q8PF29;A0A087X118;A0A6Q8PGC7;A0A0A0MQU1;A0A6Q8PH63;A0A6Q8PFN5;A0A6Q8PH59;A0A6Q8PGU8;A0A6Q8PFB9;A0A6Q8PGY8;A0A6Q8PHS8;A0A6Q8PH52;A0A6Q8PFY4;A0A6Q8PG64;A0A6Q8PFJ1;A0A6Q8PGX4;A0A6Q8PF91;A0A6Q8PEY5;A0A6Q8PEY8;A0A6Q8PGK9	Q27J81;A0A6Q8PHA2;A0A6Q8PH71;A0A6Q8PHG2;A0A6Q8PGN3;A0A6Q8PF44;A0A6Q8PFW4;A0A6Q8PH25;A0A6Q8PF29;A0A087X118;A0A6Q8PGC7;A0A0A0MQU1;A0A6Q8PH63;A0A6Q8PFN5;A0A6Q8PH59;A0A6Q8PGU8;A0A6Q8PFB9;A0A6Q8PGY8;A0A6Q8PHS8	Inverted formin-2	INF2	562					28	28	28	38	38	38	135.62	323.31	9076400000	53	174	27.9617	28.1198	27.8463	28.0711	28.2029	28.1282	28.0127	28.0661
+	1.46255	1.91448	A0A6Q8PH91;Q9BQ69	A0A6Q8PH91;Q9BQ69	O-acetyl-ADP-ribose deacetylase MACROD1	MACROD1	563					2	2	2	6.9	6.9	6.9	36.469	3.6954	741960000	15	16	26.7283	26.4241	26.1549	26.8709	24.3661	22.8846	25.1415	26.1282
	1.09249	-0.18878	P49902;A0A6Q8PHP0;A0A6Q8PHB5;Q5JUV4;Q5JUV6;A0A6Q8PG36;A0A6Q8PFH2;H0YHR8;REV__H0YES7;REV__M0QX83;REV__A0A804HLB1;S4R3A6;A0A6Q8PEZ2;REV__F5GWJ3;S4R3E7;REV__Q17RW3;REV__A0A1B0GW38;A0A6Q8PF50	P49902;A0A6Q8PHP0;A0A6Q8PHB5;Q5JUV4	Cytosolic purine 5-nucleotidase	NT5C2	564					15	15	15	39.4	39.4	39.4	64.969	111.94	4654600000	29	116	26.6668	26.8541	26.5253	26.6337	26.8778	26.6879	26.9384	26.9309
	1.54478	-0.236306	A0A7I2SU25;Q9Y223	A0A7I2SU25;Q9Y223	Bifunctional UDP-N-acetylglucosamine 2-epimerase/N-acetylmannosamine kinase;UDP-N-acetylglucosamine 2-epimerase (hydrolyzing);N-acetylmannosamine kinase	GNE	565					8	8	8	16.4	16.4	16.4	72.538	33.067	1656000000	33	59	25.3044	25.341	25.6003	25.3347	25.6033	25.7016	25.7052	25.5155
	0.0758275	-0.0209017	O14964;A0A7I2V3J3;A0A7I2V2R9;A0A7I2V2W5;A0A7I2V2D8;A0A7I2V3F9;A0A7I2V5A2;A0A7I2V2K2;A0A7I2V5A3;A0A7I2YQD1;A0A7I2V637;A0A7I2V307;A0A7I2V3I8;A0A7I2V6E0;A0A7I2V3Z1;I3L1P5;A0A7I2V4X6;A0A7I2V5D6;I3L165;A0A7I2V628;I3L1E3;A0A7I2V5W6;A0A7I2V5N3;A0A7I2V674;A0A7I2V611;A0A7I2V3Q7;A0A7I2V558;A0A7I2V5X2;A0A7I2V5L9;A0A7I2V5B7;A0A7I2V331;A0A7I2V4J7;A0A7I2YQU5;A0A7I2V310	O14964;A0A7I2V3J3;A0A7I2V2R9;A0A7I2V2W5;A0A7I2V2D8;A0A7I2V3F9;A0A7I2V5A2;A0A7I2V2K2;A0A7I2V5A3;A0A7I2YQD1;A0A7I2V637;A0A7I2V307;A0A7I2V3I8;A0A7I2V6E0;A0A7I2V3Z1;I3L1P5	Hepatocyte growth factor-regulated tyrosine kinase substrate	HGS	566					18	18	18	25.2	25.2	25.2	86.191	79.588	5313100000	25	148	26.5624	26.7418	26.7203	26.4699	26.4662	26.5856	26.7205	26.8055
	1.10947	0.416216	P27448;J3KNR0;A0A7I2V2N8;A0A7I2V639;A0A7I2V3I9;A0A7I2V5G3;A0A7I2V3B9;A0A7I2V3K2;A0A7I2V4K8;A0A7I2V4G7;H0YNV4;H0YKP9;A0A7I2V2E3;A0A7I2V4T2;A0A7I2V2I9;A0A7I2V2U9;A0A7I2V3C6;A0A7I2V409;A0A7I2YQF7;H0YJI9;H0YIY6;A0A7I2V602;A0A7I2YQF4;A0A7I2V3P5;A0A7I2V549	P27448;J3KNR0;A0A7I2V2N8;A0A7I2V639;A0A7I2V3I9;A0A7I2V5G3;A0A7I2V3B9;A0A7I2V3K2;A0A7I2V4K8;A0A7I2V4G7;H0YNV4;H0YKP9;A0A7I2V2E3;A0A7I2V4T2;A0A7I2V2I9;A0A7I2V2U9;A0A7I2V3C6;A0A7I2V409;A0A7I2YQF7;H0YJI9;H0YIY6;A0A7I2V602;A0A7I2YQF4;A0A7I2V3P5;A0A7I2V549	MAP/microtubule affinity-regulating kinase 3	MARK3	567					2	2	2	4.5	4.5	4.5	84.428	4.3476	187840000	41	19	23.8338	23.9827	23.3073	24.1216	23.4103	23.1701	23.5602	23.4399
+	4.67963	1.16848	A0A7I2V2E9;A0A7I2V3N4;A0A7I2V4H0;A0A7I2V3X6;Q9BYF1	A0A7I2V2E9;A0A7I2V3N4;A0A7I2V4H0;A0A7I2V3X6;Q9BYF1	Angiotensin-converting enzyme 2;Processed angiotensin-converting enzyme 2	ACE2	568					18	18	18	31.6	31.6	31.6	88.751	276.85	11970000000	31	185	28.0669	27.8062	27.9337	27.8012	26.7099	26.5366	26.8872	26.8003
	1.92851	-0.113292	H7C4K3;A0A7I2V2F9;E7EUI6;P05556;A0A7I2V348;C9JPK5;A0A7I2V5Z8;A0A7I2V5T3;E7EQW5;Q5T3E6;E9PLR6;H7C4N8;Q5T3E5;E9PQJ2	H7C4K3;A0A7I2V2F9;E7EUI6;P05556;A0A7I2V348;C9JPK5;A0A7I2V5Z8;A0A7I2V5T3	Integrin beta;Integrin beta-1	ITGB1	569					26	26	26	42.2	42.2	42.2	82.23	225.32	31231000000	32	344	28.343	28.2623	28.2415	28.2902	28.3527	28.3954	28.3812	28.4608
	1.15356	-0.192468	P60228;A0A7I2V3S3;A0A7I2V2H9;A0A7I2V2W0;A0A7I2V3I0;A0A7I2V4B4;A0A7I2V5Z6;A0A7I2V3I2;B3KW56;H0YBP5;A0A7I2V4G3;E5RGA2;A0A7I2V5P9;E5RHS5;A0A161SXE1;A0A7I2V570;A0A7I2V429;A0A7I2V3W9;H0YBR5;A0A7I2V2Q9;A0A7I2V5K7;A0A7I2V2S9;H0YAW4;E5RII3;E5RJ25;E5RIP5	P60228;A0A7I2V3S3;A0A7I2V2H9;A0A7I2V2W0;A0A7I2V3I0;A0A7I2V4B4;A0A7I2V5Z6;A0A7I2V3I2;B3KW56;H0YBP5;A0A7I2V4G3;E5RGA2;A0A7I2V5P9;E5RHS5;A0A161SXE1;A0A7I2V570	Eukaryotic translation initiation factor 3 subunit E	EIF3E	570					21	21	21	56.4	56.4	56.4	52.22	154.6	13060000000	28	146	29.3299	28.9645	29.0908	29.2434	29.2597	29.3957	29.3401	29.4029
	1.7628	-0.387464	F8VZJ2;F8W0W4;A0A7I2V2K5;H0YHX9;A0A7I2V473;Q13765;E9PAV3;F8VNW4;F8VZ58	F8VZJ2;F8W0W4;A0A7I2V2K5;H0YHX9;A0A7I2V473;Q13765;E9PAV3;F8VNW4	Nascent polypeptide-associated complex subunit alpha;Nascent polypeptide-associated complex subunit alpha, muscle-specific form	NACA	571					4	4	3	40.4	40.4	30.9	15.016	164.24	16760000000	6	73	29.4304	29.3145	29.2885	29.2838	30.0284	29.7342	29.5962	29.5083
+	2.08218	0.674748	A0A7I2YQT5;A0A7I2V6E3;A0A7I2V466;A0A7I2V2Q8;P53634;A0A7I2V5C5;H0YCY8	A0A7I2YQT5;A0A7I2V6E3;A0A7I2V466;A0A7I2V2Q8;P53634;A0A7I2V5C5;H0YCY8	Dipeptidyl peptidase 1;Dipeptidyl peptidase 1 exclusion domain chain;Dipeptidyl peptidase 1 heavy chain;Dipeptidyl peptidase 1 light chain	CTSC	572					4	4	4	19.3	19.3	19.3	38.535	19.394	1036400000	16	34	25.5583	25.8964	26.0511	25.3782	24.9159	24.8926	25.2022	25.1742
	1.74613	-0.214958	A0A7I2V2R3;A0A7I2V5D8;P51991;A0A7I2V402;A0A7I2V4J6;A0A7I2V4G0;H7C1J8	A0A7I2V2R3;A0A7I2V5D8;P51991;A0A7I2V402;A0A7I2V4J6;A0A7I2V4G0	Heterogeneous nuclear ribonucleoprotein A3	HNRNPA3	573					16	15	15	49.2	49.2	49.2	35.411	323.31	49940000000	18	298	29.3761	29.5169	29.5214	29.4981	29.8565	29.6802	29.6376	29.5979
	2.99037	-0.2387	A0A7I2V2T3;P12268;H0Y4R1;E7ETK5;A0A7I2YQK5;A0A7I2V5N6	A0A7I2V2T3;P12268;H0Y4R1;E7ETK5;A0A7I2YQK5	Inosine-5-monophosphate dehydrogenase 2	IMPDH2	574					26	26	24	60.9	60.9	58	56.842	323.31	34058000000	24	318	28.3006	28.374	28.3041	28.2408	28.4631	28.545	28.6045	28.5616
	1.85373	-0.286219	A0A7I2V2U6;P13995;A0A7I2V482;A0A7I2YQD4;B8ZZU9;B9A062	A0A7I2V2U6;P13995;A0A7I2V482;A0A7I2YQD4;B8ZZU9;B9A062	Bifunctional methylenetetrahydrofolate dehydrogenase/cyclohydrolase, mitochondrial;NAD-dependent methylenetetrahydrofolate dehydrogenase;Methenyltetrahydrofolate cyclohydrolase	MTHFD2	575					10	10	10	51.5	51.5	51.5	35.222	146.18	3596700000	20	79	26.3168	26.4534	26.4042	26.3681	26.7737	26.4676	26.6327	26.8135
	0.689996	0.117162	A0A7I2V351;A0A7I2V487;A0A7I2YQE1;P52292;A0A7I2V3Z3;J3QLL0;J3KS65;J3QL07	A0A7I2V351;A0A7I2V487;A0A7I2YQE1;P52292;A0A7I2V3Z3;J3QLL0;J3KS65	Importin subunit alpha-1	KPNA2	576					20	20	20	52.8	52.8	52.8	55.086	201.36	12742000000	21	149	28.4845	28.3096	28.4525	28.533	28.463	28.421	28.2266	28.2003
	0.178933	-0.0415792	A0A7I2V383;Q86U42;B4DEH8;G3V4T2;H0YJH9;A6NDY0	A0A7I2V383;Q86U42;B4DEH8;G3V4T2	Polyadenylate-binding protein 2	PABPN1	577					7	7	7	22.5	22.5	22.5	40.525	59.592	3012000000	18	77	26.5799	26.2148	26.3771	26.5449	26.4179	26.5694	26.4532	26.4424
	0.353068	0.0457392	Q8WVM8;A0A7I2V5I2;A0A7I2V5Z4;A0A7I2V3B4;A0A7I2V4R0;A0A7I2V4B8;A0A7I2V3G4;A0A7I2V4U2;A0A7I2V320;A0A7I2V590;A0A7I2V2U5;B7Z5N7;A0A7I2V448;G3V2M8;A0A7I2V362;H0YIZ7;A0A7I2V3C9;A0A7I2YQR2;G3V5E2;A0A7I2V5H5;A0A7I2V534;H0YJY1;A0A7I2V321;J3KNG4;A0A7I2YQQ1;A0A7I2V5R9;A0A7I2V414;A0A7I2V4B9;G3V363;H0YJS6;G3V4I1;A0A7I2V3Y3;G3V5F3;A0A7I2V5L2;G3V3K9	Q8WVM8;A0A7I2V5I2;A0A7I2V5Z4;A0A7I2V3B4;A0A7I2V4R0;A0A7I2V4B8;A0A7I2V3G4;A0A7I2V4U2;A0A7I2V320;A0A7I2V590;A0A7I2V2U5;B7Z5N7;A0A7I2V448;G3V2M8;A0A7I2V362;H0YIZ7;A0A7I2V3C9;A0A7I2YQR2;G3V5E2;A0A7I2V5H5	Sec1 family domain-containing protein 1	SCFD1	578					18	18	18	41.6	41.6	41.6	72.379	138.21	4325600000	34	141	26.2444	26.1352	26.1399	26.196	26.161	26.152	26.2261	25.9934
	1.30283	-0.212142	A0A7I2V428;C9JLB1;A0A7I2V3F3;H7BY16;P19338;A0A7I2V5M5;A0A7I2V699;A0A7I2V2U7;A0A7I2V349;A0A7I2V506;A0A7I2V2S8	A0A7I2V428;C9JLB1;A0A7I2V3F3;H7BY16;P19338;A0A7I2V5M5;A0A7I2V699;A0A7I2V2U7;A0A7I2V349;A0A7I2V506	Nucleolin	NCL	579					18	18	18	28.2	28.2	28.2	74.739	236.96	76888000000	35	325	29.6967	29.5217	29.6608	29.7198	30.0547	29.9033	29.7401	29.7495
	2.45168	-0.103485	P09651;A0A7I2V3R8;F8W6I7;A0A7I2V3W0;A0A7I2YQX9;A0A7I2V2L6;F8VZ49;A0A2R8Y4L2;Q32P51;F8VTQ5;H0YH80;A0A7I2V5U9;F8W646;A0A7I2YQY2;A0A7I2V334;A0A7I2V453;A0A7I2V5T1;A0A7I2V3K5;A0A7I2V2R4;A0A7I2V5H0;A0A7I2V2Z4;F8VYN5;A0A7I2V4M0;A0A7I2V3C7;A0A7I2V3W4;A0A7I2YQV3;A0A7I2V661;A0A7I2V666;A0A7I2YQ85;A0A7I2V3U8;A0A7I2V2F1;A0A7I2V5N7;A0A7I2V5L7;A0A7I2V2M7;A0A7I2V360;A0A7I2V4F8;A0A7I2V520;A0A7I2V459;A0A7I2V2Q7;A0…	P09651;A0A7I2V3R8;F8W6I7;A0A7I2V3W0;A0A7I2YQX9;A0A7I2V2L6;F8VZ49;A0A2R8Y4L2;Q32P51;F8VTQ5	Heterogeneous nuclear ribonucleoprotein A1;Heterogeneous nuclear ribonucleoprotein A1, N-terminally processed;Heterogeneous nuclear ribonucleoprotein A1-like 2	HNRNPA1;HNRNPA1L2	580					19	18	17	47	47	47	38.746	323.31	225270000000	18	720	32.3408	32.3895	32.4112	32.3471	32.4471	32.464	32.5153	32.476
+	1.92416	-1.22862	A0A7I2YQA5;A0A7I2V3T8;Q15904;A6QRJ1;A0A0C4DGX8;H7C2Y8;A6NLC6;A0A7I2V2G3;H7C0T7;F2Z3L8	A0A7I2YQA5;A0A7I2V3T8;Q15904;A6QRJ1;A0A0C4DGX8;H7C2Y8;A6NLC6	V-type proton ATPase subunit S1	ATP6AP1	581					4	4	4	18.2	18.2	18.2	33.923	6.2839	286860000	12	14	24.0946	22.434	23.1754	23.0772	24.5039	24.3779	24.3161	24.4978
	0.759613	-0.0663686	A0A7I2V4C8;A0A7I2YQR5;A0A7I2V444;A0A7I2V5N9;A0A7I2V3V0;P40763;A0A7I2V4R2;A0A7I2V4R3;A0A7I2V2T1;G8JLH9;A0A7I2V4F6	A0A7I2V4C8;A0A7I2YQR5;A0A7I2V444;A0A7I2V5N9;A0A7I2V3V0;P40763;A0A7I2V4R2;A0A7I2V4R3;A0A7I2V2T1;G8JLH9;A0A7I2V4F6	Signal transducer and activator of transcription 3;Signal transducer and activator of transcription	STAT3	582					19	19	1	38.9	38.9	3	84.843	261.79	7942500000	38	175	27.16	27.2495	27.121	27.0537	27.2205	27.1726	27.23	27.2266
	0.287198	-0.083508	Q13443;A0A7I2V3W3;A0A7I2V4B3;A0A7I2YQ97;A0A7I2V2Z6;A0A7I2V5N8;A0AVL1;F8WC54;A0A7I2V3B5;A0A7I2V2E1;A0A7I2V3C1;A0A7I2V303;A0A0J9YY58;C9J6H5;A0A7I2V5Q0;A0A7I2V5C0;C9JPM3	Q13443;A0A7I2V3W3;A0A7I2V4B3;A0A7I2YQ97;A0A7I2V2Z6;A0A7I2V5N8;A0AVL1;F8WC54;A0A7I2V3B5;A0A7I2V2E1	Disintegrin and metalloproteinase domain-containing protein 9	ADAM9	583					13	13	13	21.6	21.6	21.6	90.555	28.327	1625600000	45	47	24.6718	24.9015	25.1084	24.8249	24.7729	25.0785	25.1076	24.8815
	1.69817	0.242725	Q5M775;A0A7I2V486;A0A7I2V416;A0A7P0TBP2;A0A7I2YQJ3;A0A7I2V451;A0A7P0Z4I1;A0A7P0TB87;A0A7I2V562;A0A7P0TAS3;J3QS22;A0A7P0T9K0;J3KRB9;J3KSG2;J3QQM0;A0A7I2V5G2;J3KRN9;A0A7P0TBD3	Q5M775;A0A7I2V486;A0A7I2V416;A0A7P0TBP2;A0A7I2YQJ3;A0A7I2V451;A0A7P0Z4I1;A0A7P0TB87;A0A7I2V562;A0A7P0TAS3;J3QS22;A0A7P0T9K0;J3KRB9;J3KSG2	Cytospin-B	SPECC1	584					11	11	11	15.7	15.7	15.7	118.58	33.948	1773700000	61	53	25.3629	25.348	25.2588	25.1586	24.8892	25.1735	25.0938	25.001
	0.758963	-0.153012	Q9P0M6;A0A7I2V423;A0A7I2V412;A0A7I2YQD6;A0A7I2V2N7;A0A7I2YQR8;A0A7I2V6E9;Q5SQT3;A0A7I2V3R0;A0A7I2V522;A0A7I2V3Z8;A0A7I2V3M7;A0A7I2V5A9;A0A7I2V633;A0A7I2V5G0;A0A7I2V3C2;A0A7I2V4W8;A0A7I2YQF0	Q9P0M6;A0A7I2V423;A0A7I2V412;A0A7I2YQD6;A0A7I2V2N7;A0A7I2YQR8;A0A7I2V6E9;Q5SQT3	Core histone macro-H2A.2;Histone H2A	H2AFY2	585					7	5	5	24.7	17.7	17.7	40.058	12.64	912750000	19	27	25.5566	25.418	25.1718	25.321	25.6722	25.3936	25.5058	25.5078
	0.335358	-0.0335712	A0A7I2V430;A0A7I2V4F0;Q92499;A0A087WZ71;A0A7I2V2M5;A0A7I2YQ77;A0A087X2G1;A0A7I2V4J3;A0A7I2V421;A0A7I2V5X8;A0A7I2YQD0;A0A7I2V4Q0	A0A7I2V430;A0A7I2V4F0;Q92499;A0A087WZ71;A0A7I2V2M5;A0A7I2YQ77;A0A087X2G1;A0A7I2V4J3	ATP-dependent RNA helicase DDX1	DDX1	586					31	31	31	54.8	54.8	54.8	77.86	323.31	23599000000	40	321	28.0421	28.1051	28.1324	28.0726	28.0246	28.0985	28.1734	28.19
+	3.0253	-0.440811	A0A7I2V4E5;Q9Y4W2;A0A7I2V3Q3;A0A7I2V3R6;A0A7I2V653;A0A7I2YQI7;A0A7I2V5R7	A0A7I2V4E5;Q9Y4W2;A0A7I2V3Q3;A0A7I2V3R6;A0A7I2V653;A0A7I2YQI7;A0A7I2V5R7	Ribosomal biogenesis protein LAS1L	LAS1L	587					9	9	9	22.3	22.3	22.3	70.37	57.302	1475100000	34	52	25.1607	25.0757	25.1779	25.1786	25.5652	25.7904	25.5075	25.493
	0.0524063	0.0451517	A0A7I2V4I5;Q5T200	A0A7I2V4I5;Q5T200	Zinc finger CCCH domain-containing protein 13	ZC3H13	588					3	3	3	1.9	1.9	1.9	196.7	5.7338	262220000	64	18	24.1401	24.0268	23.6992	22.8795	23.5212	23.5703	23.9479	23.5256
	0.696782	0.400928	A0A7I2V4K5;X6R5C5;X6R8A1;P10619;A0A7I2V4D1;A0A7I2YQT8;A0A7I2V3B2;Q5JZH0;A0A7I2V4R8;U3KQ41;A0A7I2V3M2;A0A7I2V4Q9;U3KQU6;A0A7I2V2E2	A0A7I2V4K5;X6R5C5;X6R8A1;P10619;A0A7I2V4D1;A0A7I2YQT8;A0A7I2V3B2;Q5JZH0	Carboxypeptidase;Lysosomal protective protein;Lysosomal protective protein 32 kDa chain;Lysosomal protective protein 20 kDa chain	CTSA	589					8	8	8	23.1	23.1	23.1	50.925	37.37	2189100000	19	51	25.3728	26.116	25.7126	26.5946	25.7408	25.5445	25.2991	25.608
	0.817964	-0.2184	A0A7I2V4L6;O15498;A0A7I2V3A1;A0A7I2V3V7;H7C3K7	A0A7I2V4L6;O15498;A0A7I2V3A1;A0A7I2V3V7	Synaptobrevin homolog YKT6	YKT6	590					5	5	5	30.9	30.9	30.9	21.713	32.631	1398000000	13	34	25.3437	25.6678	25.5174	25.4158	25.6437	25.8069	25.947	25.4207
	0.463512	-0.0715547	A0A7I2V4L7;B1ANR0;Q13310;A0A7I2V598;H0Y5F5;A0A7I2V5W9;H0YEU6;A0A7I2V4V6;H0YEQ8;B1ANR1;H0YCC8;H0Y6X6;H0YER0;P0CB38	A0A7I2V4L7;B1ANR0;Q13310;A0A7I2V598;H0Y5F5;A0A7I2V5W9	Polyadenylate-binding protein;Polyadenylate-binding protein 4	PABPC4	591					24	14	13	43.3	24.8	23.3	66.499	66.14	6649000000	33	112	27.1786	27.464	27.3763	27.2045	27.3478	27.393	27.3674	27.4015
	2.49191	-0.243359	A0A7I2V4Y9;Q13561;A8K8J9;A0A7I2V4H4;H0YI98;F8W1I6;F8VW18;A0A7I2V390;H0YHL1;F8VRV7;A0A7I2V5R4;A0A7I2V2Z2	A0A7I2V4Y9;Q13561;A8K8J9;A0A7I2V4H4;H0YI98;F8W1I6;F8VW18;A0A7I2V390	Dynactin subunit 2	DCTN2	593					15	15	15	52.4	52.4	52.4	41.622	186.94	9140400000	20	165	27.2024	27.1356	27.0225	27.0307	27.2964	27.29	27.3908	27.3873
	0.538175	0.0893388	A0A7I2V5Y7;A0A7I2V535;Q15233;A0A7I2V4J2;A0A7P0MRW0;A0A7I2V4N2;A0A7I2V464;A0A7I2V4K9;H7C367;C9JYS8;C9IZL7;C9J4X2;A0A7I2YQK8	A0A7I2V5Y7;A0A7I2V535;Q15233;A0A7I2V4J2;A0A7P0MRW0;A0A7I2V4N2;A0A7I2V464;A0A7I2V4K9;H7C367;C9JYS8	Non-POU domain-containing octamer-binding protein	NONO	594					21	20	19	43.5	41.8	40.3	54.826	291.38	43095000000	21	388	29.8818	29.583	29.6351	29.5671	29.5291	29.6365	29.5934	29.5506
	0.286705	-0.0450673	A0A7I2V539;P30419;A0A7I2V3X4;A0A7I2V4Y5;A0A7I2V3U5;B7Z8J4;K7EN82;K7EN42;A0A7I2V3M5	A0A7I2V539;P30419;A0A7I2V3X4;A0A7I2V4Y5;A0A7I2V3U5;B7Z8J4	Glycylpeptide N-tetradecanoyltransferase 1	NMT1	595					11	11	10	25.3	25.3	22.5	56.568	123.25	8017900000	21	106	27.3265	27.5469	27.4819	27.294	27.5281	27.4236	27.4499	27.4279
	1.05285	0.115601	Q5JRX3;A0A7I2V5C6;A0A7I2YQT2;A0A7I2YQX5;A0A7I2V5H2;A0A7I2V397;A0A0A0MRX9;A0A7I2V3B6;A0A7I2V3X0;H0Y4F7;A0A7I2V5R2;A0A7I2V4N3;A0A7I2V449;B1APQ0;H0Y7L7;B4DEU0;A0A7I2V5K2;B1APQ1	Q5JRX3;A0A7I2V5C6;A0A7I2YQT2;A0A7I2YQX5;A0A7I2V5H2;A0A7I2V397;A0A0A0MRX9;A0A7I2V3B6;A0A7I2V3X0;H0Y4F7;A0A7I2V5R2	Presequence protease, mitochondrial	PITRM1	597					30	30	30	41.6	41.6	41.6	117.41	112.43	10373000000	55	238	27.034	26.9738	26.8744	27.063	26.7745	26.8412	26.9376	26.9294
	0.0343831	0.00481749	A0A7I2YQA8;A0A7I2YQQ0;A0A7I2V5D0;P26358;A0A7I2V5F1;A0A7I2V490;A0A7I2V5F6;A0A7I2V311;A0A7I2V2G5;K7ENW7;K7EJL0;K7EMU8;K7ENQ6;A0A7I2V3F8;K7EIZ6;K7ERQ1	A0A7I2YQA8;A0A7I2YQQ0;A0A7I2V5D0;P26358;A0A7I2V5F1;A0A7I2V490;A0A7I2V5F6;A0A7I2V311	DNA (cytosine-5)-methyltransferase 1	DNMT1	598					26	26	26	20.2	20.2	20.2	179.16	54.811	3021000000	74	109	25.4145	25.5409	25.4109	25.3805	25.4903	25.3464	25.4755	25.4154
	0.0674138	0.0269589	A0A7I2V5E1;A0A7I2YQE9;B7Z2R7;A0A7I2YQD7;A0A7I2V2Y9;Q5T8D3;A0A7I2V2M2;A0A7I2V560;A0A7I2YQJ9;A0A7I2V690;A0A7I2V5U2;A0A7I2V347;A0A7I2V420;A0A7I2V5L4;A0A7I2V556;A0A7I2YQS1;A0A7I2V462;Q5T8E0;X6RDD7;A0A7I2V2R8;A0A087X0B8	A0A7I2V5E1;A0A7I2YQE9;B7Z2R7;A0A7I2YQD7;A0A7I2V2Y9;Q5T8D3;A0A7I2V2M2;A0A7I2V560;A0A7I2YQJ9;A0A7I2V690;A0A7I2V5U2;A0A7I2V347;A0A7I2V420;A0A7I2V5L4;A0A7I2V556;A0A7I2YQS1	Acyl-CoA-binding domain-containing protein 5	ACBD5	600					9	9	9	18.6	18.6	18.6	57.673	38.173	1864600000	28	52	25.8577	26.0067	25.6769	25.895	25.8289	25.8658	26.1218	25.512
	0.895023	-0.2679	A0A7I2V5L3;M0QYS1;P40429;Q8J015;A0A7I2V2L9;Q6NVV1	A0A7I2V5L3;M0QYS1;P40429;Q8J015;A0A7I2V2L9;Q6NVV1	60S ribosomal protein L13a;Putative 60S ribosomal protein L13a protein RPL13AP3	RPL13A;RPL13a;RPL13AP3	602					5	5	5	21.3	21.3	21.3	21.716	25.704	5101300000	10	45	27.7554	27.4165	27.2844	27.6988	28.0689	27.7757	27.8064	27.5757
	0.56914	0.0971518	P07711;A0A7I2V5M3;Q5T8F0;A0A7I2YQA2;A0A7I2V2H7;A0A7I2V484;A0A7I2YQB5;A0A7I2V601;A0A7I2V354;A0A7I2V5Y9;Q5QP40;A0A7P0T983;A0A7I2YQX0;P43235;A0A7I2V2M6;A0A7P0Z415;A0A7I2V4B1;O60911;A0A7I2V5Y6;A0A7I2V4B6;Q5NE16	P07711;A0A7I2V5M3;Q5T8F0;A0A7I2YQA2;A0A7I2V2H7;A0A7I2V484;A0A7I2YQB5	Cathepsin L1;Cathepsin L1 heavy chain;Cathepsin L1 light chain	CTSL	603					6	6	6	22.8	22.8	22.8	37.564	44.413	3962700000	11	58	27.3	27.387	27.414	27.2505	27.1029	27.1843	27.4335	27.2422
	0.331588	-0.331356	A0A7I2V629;E9PG73;A0A7I2V5Q5;Q13427;C9JM79;A0A7I2V4F2;C9J679;A0A7I2V4W3;C9JN15	A0A7I2V629;E9PG73;A0A7I2V5Q5;Q13427;C9JM79;A0A7I2V4F2	Peptidyl-prolyl cis-trans isomerase G	PPIG	604					3	3	3	4.5	4.5	4.5	85.957	5.9658	249530000	22	16	23.8362	24.2685	24.358	23.1077	24.075	24.2874	25.0312	23.5024
	0.0412646	-0.00651836	A0A7I2V5R1;Q8TD19;A0A7I2V454;G3V5V0;G3V459;G3V2Z5;A0A7I2V4E9	A0A7I2V5R1;Q8TD19;A0A7I2V454	Serine/threonine-protein kinase Nek9	NEK9	605					8	8	8	8	8	8	108.46	9.3446	1059100000	48	26	25.7972	25.7957	25.7236	25.8114	25.809	25.9227	25.7344	25.6879
	2.241	-0.250686	Q5JWE9;A0A7I2V5R6;P63092;Q5JWF2;A0A804HIH4;A0A590UJF0;A0A590UK28;B0AZR9;A0A590UJQ9;A0A0A0MR13;A0A590UJY2;A0A590UJS2;P38405;A0A590UJC9;K7EQ80;K7EPE2	Q5JWE9;A0A7I2V5R6;P63092;Q5JWF2;A0A804HIH4;A0A590UJF0;A0A590UK28;B0AZR9;A0A590UJQ9;A0A0A0MR13;A0A590UJY2;A0A590UJS2	Guanine nucleotide-binding protein G(s) subunit alpha isoforms short;Guanine nucleotide-binding protein G(s) subunit alpha isoforms XLas	GNAS	606					12	11	11	14	12.9	12.9	109.54	51.06	2431700000	33	73	25.5674	25.5842	25.7832	25.7161	25.9776	25.9413	25.843	25.8918
	0.358602	0.0571275	A0A7I2V5S2;A0A7I2YQC0;P06748;A0A7I2V433;A0A7I2V2X9;A0A7I2V3U2;A0A7I2V4G8;A0A7I2V3G5;A0A7I2V579;E5RGW4	A0A7I2V5S2;A0A7I2YQC0;P06748;A0A7I2V433;A0A7I2V2X9;A0A7I2V3U2;A0A7I2V4G8;A0A7I2V3G5;A0A7I2V579	Nucleophosmin	NPM1	607					10	10	5	40.3	40.3	21.3	33.875	323.31	181180000000	14	349	31.894	31.6875	31.8083	31.8138	31.8136	31.8545	31.6253	31.6817
+	3.68729	-0.411	A0A7I2V5T7;Q9H7Z7;A6NHH0;A0A7I2V5X6;X6RJ95;A0A7I2V308;A0A7I2YQ70	A0A7I2V5T7;Q9H7Z7;A6NHH0;A0A7I2V5X6	Prostaglandin E synthase 2;Prostaglandin E synthase 2 truncated form	PTGES2	608					12	12	12	45.5	45.5	45.5	41.08	85.956	3349900000	25	98	26.1028	26.0901	26.101	25.9376	26.558	26.458	26.4044	26.4551
	1.25443	0.0986562	A0A7I2V5Z3;O43765;A0A7I2V4T9;A0A7I2V2U2;A0A7I2V588;A0A7I2V697;K7EMD6;A0A7I2YQY5;K7ERW5	A0A7I2V5Z3;O43765;A0A7I2V4T9;A0A7I2V2U2;A0A7I2V588;A0A7I2V697;K7EMD6	Small glutamine-rich tetratricopeptide repeat-containing protein alpha	SGTA	609					9	9	9	33.9	33.9	33.9	32.403	58.059	3622200000	12	80	26.6994	26.7089	26.7114	26.5828	26.5307	26.5425	26.5806	26.6539
	1.39335	-0.30924	A0A7I2V5Z5;Q96D53;A0A7I2V544;M0R0L2;M0R001;A0A7I2V3G8;M0R011;A0A7I2V4Z6;M0R362;A0A7I2V3W7;M0QZZ2;M0R3F7;A0A7I2V4T3;A0A7I2V3Y0	A0A7I2V5Z5;Q96D53;A0A7I2V544;M0R0L2;M0R001;A0A7I2V3G8	AarF domain-containing protein kinase 4	ADCK4	610					6	6	6	21.4	21.4	21.4	48.431	35.945	815330000	23	26	24.8446	24.8448	24.4965	24.6945	24.9181	24.8701	25.0834	25.2458
	2.58348	0.368982	P07858;E9PHZ5;A0A7I2V668;A0A7I2V440;A0A7P0NGZ6;A0A7I2YQK9;A0A7I2V4Z9;E9PQM1;E9PSG5;E9PR21;A0A7I2V4S6;E9PKQ7;E9PNL5;E9PLY3;A0A7I2V367;E9PCB3;A0A7I2V302;A0A7I2V2J1;R4GMQ5;E9PS78	P07858;E9PHZ5;A0A7I2V668;A0A7I2V440;A0A7P0NGZ6;A0A7I2YQK9;A0A7I2V4Z9;E9PQM1;E9PSG5;E9PR21	Cathepsin B;Cathepsin B light chain;Cathepsin B heavy chain	CTSB	611					9	9	9	36.6	36.6	36.6	37.821	299.99	8651800000	19	117	27.8906	27.7967	27.6419	27.7181	27.4419	27.3667	27.2598	27.5029
	0.732662	-0.108806	A0A7I2YQ95;H7C4F6;O00629;A0A7I2V340;A0A7I2V333	A0A7I2YQ95;H7C4F6;O00629;A0A7I2V340;A0A7I2V333	Importin subunit alpha-3	KPNA4	612					14	14	11	47.6	47.6	39.4	53.034	150.78	6808300000	15	129	27.1859	27.2886	27.2762	27.4387	27.3254	27.4657	27.3163	27.5173
	2.46939	-0.159157	Q13347;A0A7I2YQF8;A0A7I2V3U3;A0A7P0MRT9;A0A7I2YQI2;A0A7I2V613;A0A7I2V607;A0A7I2V3N2;A0A7I2V2M3;A0A7I2V640;A0A7I2V685;A0A7I2YQC8;A0A7I2YQI6;A0A7I2YQT9;A0A7I2YQU2;A0A7I2V5V8;Q5TFK1;A0A7I2V4S8;A0A7I2V3K6;A0A7I2V4C2;A0A7I2YQP9;A0A7I2V391;A0A7I2YQN1;A0A7I2V3T4;A0A7I2V5E4;A0A7I2YQX4	Q13347;A0A7I2YQF8;A0A7I2V3U3;A0A7P0MRT9;A0A7I2YQI2;A0A7I2V613;A0A7I2V607;A0A7I2V3N2;A0A7I2V2M3;A0A7I2V640;A0A7I2V685;A0A7I2YQC8;A0A7I2YQI6;A0A7I2YQT9;A0A7I2YQU2;A0A7I2V5V8;Q5TFK1;A0A7I2V4S8;A0A7I2V3K6;A0A7I2V4C2	Eukaryotic translation initiation factor 3 subunit I	EIF3I	613					17	17	17	71.7	71.7	71.7	36.501	184.43	14409000000	19	183	27.7233	27.7861	27.626	27.7161	27.8836	27.8863	27.8494	27.8689
	0.371796	-0.085732	J3QR09;J3KTE4;A0A7I2YQG2;P84098;A0A7I2V638;A0A7I2V4U6;A0A7I2V2L0;A0A7I2V512	J3QR09;J3KTE4;A0A7I2YQG2;P84098	Ribosomal protein L19;60S ribosomal protein L19	RPL19	614					6	6	6	26.4	26.4	26.4	23.134	90.039	29957000000	6	123	29.2922	29.6403	29.332	29.329	29.6372	29.4262	29.5072	29.3658
	2.20433	-0.183359	Q13283;A0A7I2YQN9;A0A7I2V5M7;A0A7P0P2U7;A0A7I2YQU8;A0A7I2V651;E5RH42;E5RJU8;E5RIF8;A0A7I2V2S5;A0A7I2YQH0;A0A7I2V548;A0A7I2V565;A0A7I2V2X7;A0A7I2YQM1;E5RH00;A0A7I2V4D8;A0A7I2V4Y8;A0A7I2V3C4;A0A7I2V2V1;A0A7I2YQB1;A0A7I2V494;A0A7I2YQQ8;A0A7I2V496;A0A7I2V5H1;A0A7I2V326;A0A7I2YQF2;A0A7I2V533	Q13283;A0A7I2YQN9;A0A7I2V5M7;A0A7P0P2U7;A0A7I2YQU8;A0A7I2V651	Ras GTPase-activating protein-binding protein 1	G3BP1	616					15	14	14	46.1	44.4	44.4	52.164	323.31	32359000000	22	295	28.7044	28.7409	28.7151	28.626	28.974	28.8058	28.9012	28.8388
	0.693222	-0.129812	A0A7N4I394;O75400;F5H578;H0YG38;F8VU11;Q6NWY9;H7C2N3	A0A7N4I394;O75400	Pre-mRNA-processing factor 40 homolog A	PRPF40A	619					16	16	16	19	19	19	112.4	48.968	2479500000	36	68	25.9309	25.6044	25.6387	25.9092	25.9372	25.8196	25.9157	25.9298
	0.316826	-0.091886	G5E9W7;A0A7P0MKV3;P82650;H7C5F2;H7C5H3;H7C5L9;C9J5D8	G5E9W7;A0A7P0MKV3;P82650	28S ribosomal protein S22, mitochondrial	MRPS22	620					12	12	12	46.4	46.4	46.4	36.805	69.142	3206400000	21	96	25.8223	26.0085	25.5225	25.8256	25.8821	25.6898	25.9887	25.9858
	2.01309	-0.336009	A0A7P0S5H5;P60866;E5RJX2;G3XAN0;E5RIP1	A0A7P0S5H5;P60866;E5RJX2;G3XAN0	40S ribosomal protein S20	RPS20	621					4	4	4	22.8	22.8	22.8	15.312	66.205	38917000000	5	77	30.0903	29.8244	29.8001	30.0951	30.3035	30.2064	30.3894	30.2547
	0.214917	-0.0810881	A0A7P0T9L9;A0A7P0TA34;A0A7P0T7Z2;Q9Y6D5	A0A7P0T9L9;A0A7P0TA34;A0A7P0T7Z2;Q9Y6D5	Brefeldin A-inhibited guanine nucleotide-exchange protein 2	ARFGEF2	622					6	6	3	4.9	4.9	3.1	175.51	27.245	505520000	87	26	24.8278	24.8174	24.508	24.5441	24.6123	24.5765	25.1154	24.7174
	0.145079	0.0607371	Q99986;A0A7P0Z462;A0A7P0TA65;A0A7P0T9T1;H0YJJ9;A0A7P0TB15;A0A7P0T838;A0A7P0T9E5;A0A7P0Z3Z7;A0A7P0TBB8;A0A7P0TAS8;A0A7P0TBE4;H0YJF7;A0A7P0TAA6;A0A7P0TA16;A0A7P0T824;A0A7P0T952;A0A7P0T9I1;A0A7P0T977;A0A7P0Z445;A0A7P0T8N0;A0A7P0T925;A0A7P0Z4A4;A0A7P0TBI6;A0A7P0T9C6;H0YJ50;A0A7P0TB08;A0A7P0T814;A0A7P0T9B1;A0A7P0T832;A0A7P0Z4C8;A0A7P0TA07;A0A7P0T8M0;A0A7P0T8Z5;A0A7P0TAI5;A0A7P0Z4P9;A0A7P0T833	Q99986;A0A7P0Z462;A0A7P0TA65;A0A7P0T9T1;H0YJJ9;A0A7P0TB15;A0A7P0T838;A0A7P0T9E5;A0A7P0Z3Z7;A0A7P0TBB8;A0A7P0TAS8;A0A7P0TBE4;H0YJF7;A0A7P0TAA6;A0A7P0TA16;A0A7P0T824;A0A7P0T952;A0A7P0T9I1;A0A7P0T977;A0A7P0Z445;A0A7P0T8N0;A0A7P0T925;A0A7P0Z4A4;A0A7P0TBI6;A0A7P0T9C6;H0YJ50;A0A7P0TB08;A0A7P0T814	Serine/threonine-protein kinase VRK1	VRK1	625					7	7	7	22	22	22	45.476	28.101	1172700000	18	50	24.8645	25.4332	25.2699	25.2353	25.1077	25.0932	24.9298	25.4294
	0.642126	0.20645	A0A7P0T847;A0A7P0TBP0;V9GZ50;A0A7P0T9N5;A0A7P0TAD3;A0A7P0TAJ5;A0A7P0TAE3;Q9ULX6;M0R1Y5;M0R010;M0QYT7	A0A7P0T847;A0A7P0TBP0;V9GZ50;A0A7P0T9N5;A0A7P0TAD3;A0A7P0TAJ5;A0A7P0TAE3;Q9ULX6;M0R1Y5;M0R010;M0QYT7	A-kinase anchor protein 8-like	AKAP8L	626					2	2	2	6.8	6.8	6.8	43.068	4.6303	138470000	15	10	23.4255	23.2674	23.271	23.6735	23.1415	22.8873	23.3932	23.3896
	0.490063	-0.147351	A0A7P0Z4N2;A0A7P0Z434;A0A7P0TAR0;A0A7P0T868;Q9NY61;A0A7P0TBI0;A0A7P0Z4P2;A0A7P0TBG4;A0A087WTH8;A0A087WWS8	A0A7P0Z4N2;A0A7P0Z434;A0A7P0TAR0;A0A7P0T868;Q9NY61;A0A7P0TBI0;A0A7P0Z4P2;A0A7P0TBG4;A0A087WTH8	Protein AATF	AATF	627					5	5	5	19.2	19.2	19.2	53.309	23.049	876790000	19	27	25.782	25.497	25.4536	25.1275	25.6366	25.68	25.5531	25.5797
	0.0715023	-0.0724235	E9PHM6;F6QMI7;A0A7P0T890;Q03001;A0A0U1RQJ2;F8W9J4;A0A494C073;A0A494C1D7	E9PHM6;F6QMI7;A0A7P0T890;Q03001;A0A0U1RQJ2;F8W9J4	Dystonin	DST	628					7	5	5	1.5	1.2	1.2	629.78	3.8924	408830000	319	12	24.9371	24.0595	24.7313	24.8363	23.9772	24.5436	25.4137	24.9195
	0.110534	0.1394	A0A7P0TB10;A0A7P0TBI2;A0A7P0T8N6;A0A804CHQ2;A0A7P0T9P7;A0A7P0T897;P98155;A0A7P0Z477;A0A7P0T8N9	A0A7P0TB10;A0A7P0TBI2;A0A7P0T8N6;A0A804CHQ2;A0A7P0T9P7;A0A7P0T897;P98155;A0A7P0Z477;A0A7P0T8N9	Very low-density lipoprotein receptor	VLDLR	629					2	2	2	4.8	4.8	4.8	62.082	12.496	123120000	30	11	23.1864	22.6946	22.9753	23.8761	23.4004	21.9283	23.1119	23.7341
	0.346855	0.373351	A0A7P0T8Z7;A0A7P0TBI9;A0A7P0Z4A2;A0A7P0Z4A5;A0A7P0T8D4;A0A7P0T8S8;A0A7P0T8Z2;A0A7P0T8C7;Q9Y5X1;A0A7P0T8M2	A0A7P0T8Z7;A0A7P0TBI9;A0A7P0Z4A2;A0A7P0Z4A5;A0A7P0T8D4;A0A7P0T8S8;A0A7P0T8Z2;A0A7P0T8C7;Q9Y5X1;A0A7P0T8M2	Sorting nexin-9	SNX9	631					7	7	7	17.4	17.4	17.4	56.52	39.59	726020000	23	39	25.1688	25.6732	25.1248	24.9284	23.5584	25.1612	25.421	25.2611
	0.918181	-0.0887437	A0A7P0TB55;A0A7P0T8G6;F6YB23;Q5T4U5;P11310;A0A7P0TB51;A0A7P0T932;A0A7P0TAB2;A0A7P0TBD1;A0A7P0T8J9;A0A7P0TA63	A0A7P0TB55;A0A7P0T8G6;F6YB23;Q5T4U5;P11310;A0A7P0TB51;A0A7P0T932	Medium-chain specific acyl-CoA dehydrogenase, mitochondrial	ACADM	632					8	8	8	32.4	32.4	32.4	30.14	41.026	5427500000	16	55	28.624	28.724	28.6134	28.5733	28.7203	28.7601	28.79	28.6193
+	3.23599	-0.465562	Q9UBR2;A0A7P0T8I6;A0A7P0T989;A0A7P0TA25;A0A7P0Z469;A0A7P0T9G9;A0A7P0T8X2;A0A7P0T900;A0A7P0TBM7;A0A7P0TB41;A0A7P0T9U1;A0A7P0TBB5;A0A7P0Z4R9;A0A7P0TAD4;A0A7P0TAT6;A0A7P0T926;A0A7P0T9U4;A0A7P0Z4L7	Q9UBR2;A0A7P0T8I6;A0A7P0T989;A0A7P0TA25;A0A7P0Z469;A0A7P0T9G9;A0A7P0T8X2;A0A7P0T900;A0A7P0TBM7;A0A7P0TB41;A0A7P0T9U1;A0A7P0TBB5;A0A7P0Z4R9;A0A7P0TAD4;A0A7P0TAT6;A0A7P0T926	Cathepsin Z	CTSZ	633					4	4	4	14.2	14.2	14.2	33.868	27.125	1131000000	11	25	25.4078	25.2013	25.419	25.2202	25.6704	25.7684	25.8339	25.8378
	0.0764527	-0.0516095	A0A7P0T8J7;A2A2Q9;A0A7P0TA70;Q9Y312	A0A7P0T8J7;A2A2Q9;A0A7P0TA70;Q9Y312	Protein AAR2 homolog	AAR2	634					5	5	5	14	14	14	37.375	14.63	432170000	15	21	24.2801	24.1717	23.9982	24.298	24.2757	24.7068	23.5979	24.374
	0.119442	0.0216947	A0A7P0T8N8;O14776;G3V220;Q5VWI1	A0A7P0T8N8;O14776;G3V220	Transcription elongation regulator 1	TCERG1	635					24	24	24	21.5	21.5	21.5	126	91.749	6133800000	42	157	26.3861	26.5361	26.4143	26.4	26.3396	26.2882	26.4937	26.5282
	0.484249	-0.111551	A0A7P0TAW4;A0A7P0T8Y2;A0A7P0TAF4;A0A7P0TBC5;Q4KMQ2;A0A7P0TBD5;A0A7P0TBI1	A0A7P0TAW4;A0A7P0T8Y2;A0A7P0TAF4;A0A7P0TBC5;Q4KMQ2;A0A7P0TBD5;A0A7P0TBI1	Anoctamin-6	ANO6	636					5	5	5	9.9	9.9	9.9	81.101	19.576	751840000	36	43	24.5958	25.0501	24.7208	24.9408	24.9122	24.9137	24.9352	24.9925
	0.490966	-0.766447	A0A7P0T915;Q9NXA8;A0A7P0TBF5;A0A7P0TA05;A0A7P0T9X1;A0A7P0Z490;A0A7P0T9N1;A0A7P0T877;A0A7P0Z4N6;A0A7P0Z4F6	A0A7P0T915;Q9NXA8;A0A7P0TBF5;A0A7P0TA05;A0A7P0T9X1;A0A7P0Z490;A0A7P0T9N1	NAD-dependent protein deacylase sirtuin-5, mitochondrial	SIRT5	637					3	3	3	13.4	13.4	13.4	34.392	4.7331	304870000	20	4	24.0046	23.8457	24.5073	23.0365	25.3713	25.2938	25.1009	22.6938
	0.363581	0.483233	A0A7P0T961;Q9BTA9;A0A0A0MRT2;J3QTA0	A0A7P0T961;Q9BTA9;A0A0A0MRT2	WW domain-containing adapter protein with coiled-coil	WAC	638					3	3	3	7.6	7.6	7.6	65.509	6.2424	441880000	29	30	24.4591	24.5791	24.8186	24.2674	22.3913	24.712	24.8001	24.2878
	0.259194	0.091609	A0A7P0T9R9;A0A7P0T9E7;A0A7P0TAR1;P43155;A0A7P0TBF3;H0Y4Z7;A0A7P0TAQ4;B7ZBP5;A6PVN3	A0A7P0T9R9;A0A7P0T9E7;A0A7P0TAR1;P43155;A0A7P0TBF3;H0Y4Z7	Carnitine O-acetyltransferase	CRAT	640					8	8	8	16.4	16.4	16.4	65.061	22.048	1074500000	26	40	25.3007	25.0794	25.166	25.1589	24.9188	24.9819	25.4951	24.9428
+	4.41255	0.426944	P43490;A0A7P0T9I9;A0A7P0T895;A0A7P0T973;A0A7P0T931;A0A7P0T8L3;A0A7P0TAS5;A0A7P0T862;A0A7P0T8D2;A0A0C4DFS8;A0A7P0T941;A0A7P0TBB7;A0A7P0TA73;A0A7P0Z466;B7Z8W6;A0A7P0Z4N0;A0A7P0T9F0;A0A7P0TB17;A0A7P0T8Z3;A0A7P0T8R4;A0A7P0TAI8;A0A7P0Z437;C9JG65;C9JF35;A0A7P0Z4L4;A0A7P0TAZ2	P43490;A0A7P0T9I9;A0A7P0T895;A0A7P0T973;A0A7P0T931;A0A7P0T8L3;A0A7P0TAS5;A0A7P0T862;A0A7P0T8D2;A0A0C4DFS8	Nicotinamide phosphoribosyltransferase	NAMPT	641					24	24	24	56.6	56.6	56.6	55.52	323.31	26859000000	29	298	28.8355	28.7098	28.7827	28.8934	28.3894	28.3926	28.3712	28.3604
	1.20625	-0.932234	A0A7P0TB24;A0A7P0T9J6;H7C0W5;A0A7P0TB44;H7C1Q6;Q9NXE4;H7C2J2;F8WF03;F2Z2I0;F2Z2W5;C9J647;H7C235;A0A7P0TAZ0;A0A7P0T8J0;A0A7P0Z453	A0A7P0TB24;A0A7P0T9J6;H7C0W5;A0A7P0TB44;H7C1Q6;Q9NXE4;H7C2J2	Sphingomyelin phosphodiesterase 4	SMPD4	642					4	4	4	6.2	6.2	6.2	93.351	31.131	282730000	44	17	23.8329	22.3924	23.8977	22.6241	23.842	24.1286	24.3255	24.1798
	0.566764	-0.298011	A0A7P0T9T8;Q9UHI6;A0A7P0T8G7;A0A7P0TB94;A0A7P0Z4K8;A0A7P0Z4I9;A0A7P0TBA6	A0A7P0T9T8;Q9UHI6	Probable ATP-dependent RNA helicase DDX20	DDX20	643					9	9	9	16.6	16.6	16.6	83.292	30.554	706530000	39	32	25.0968	24.0923	24.6315	24.5669	24.6112	24.7404	25.0171	25.2109
	2.72141	-0.191002	A0A7P0T9U7;Q15637;C9J792;F8WEV5	A0A7P0T9U7;Q15637	Splicing factor 1	SF1	644					9	9	8	17.9	17.9	16.2	80.369	121.28	9059200000	19	133	27.7401	27.8333	27.7981	27.8518	28.0019	27.9286	28.0592	27.9977
	1.22358	-0.168846	Q9Y6K5;A0A7P0T9W6;A0A7P0TAU8;A0A7P0Z4F1;A0A7P0T9J0;A0A7P0Z4D0;A0A7P0TAC0;A0A7P0Z4F5;A0A7P0T8S7;A0A7P0T7V2;A0A7P0TAS0;A0A7P0TB73;A0A7P0TAC8;A0A7P0TAV3;A0A7P0T8J8;A0A7P0TA50;F8VS35;A0A7P0T9Z5;A0A7P0TAT5;F8VWK9;A0A7P0TA44;A0A7P0T884;A0A7P0TB72;A0A7P0Z4Q3	Q9Y6K5;A0A7P0T9W6;A0A7P0TAU8;A0A7P0Z4F1;A0A7P0T9J0;A0A7P0Z4D0;A0A7P0TAC0;A0A7P0Z4F5;A0A7P0T8S7;A0A7P0T7V2;A0A7P0TAS0;A0A7P0TB73;A0A7P0TAC8	2-5-oligoadenylate synthase 3	OAS3	645					19	19	19	23	23	23	121.17	77.627	3913100000	49	113	25.6711	25.9774	25.7277	25.8906	25.9677	25.9762	26.0352	25.9631
	3.09913	0.173532	P07237;A0A7P0TA71;A0A7P0TA35;A0A7P0TB26;I3L4M2;A0A7P0T8C0;A0A7P0T8X1;A0A7P0TA97;H7BZ94;A0A7P0T9K9;I3L3P5;A0A7P0T8J3;H0Y3Z3;A0A7P0T9U6;I3L0S0;A0A7P0T9D6;I3L514;B3KTQ9;A0A7P0Z4S2;A0A7P0Z4J0;A0A7P0TAX9;A0A7P0TBP8;I3NI03;A0A7P0Z476;I3L3U6;A0A7P0T9S9;A0A7P0T9E3;I3L1Y5;A0A7P0T940;A0A7P0Z4B2;A0A7P0TBA3;A0A7P0Z4F8	P07237;A0A7P0TA71;A0A7P0TA35;A0A7P0TB26;I3L4M2;A0A7P0T8C0;A0A7P0T8X1;A0A7P0TA97;H7BZ94;A0A7P0T9K9;I3L3P5;A0A7P0T8J3;H0Y3Z3;A0A7P0T9U6;I3L0S0;A0A7P0T9D6;I3L514	Protein disulfide-isomerase	P4HB	646					28	28	28	55.3	55.3	55.3	57.116	323.31	132700000000	35	501	30.8634	30.7474	30.7933	30.7533	30.5961	30.6352	30.6135	30.6185
	0.215718	0.0400019	A0A7P0TA76;O95573;A0A7P0TBB1;A0A7P0T8L6;A0A7P0TB52;A0A7P0T905;H7BYZ7;A0A7P0TBL9;F5GWH2;C9JC11	A0A7P0TA76;O95573;A0A7P0TBB1;A0A7P0T8L6;A0A7P0TB52;A0A7P0T905;H7BYZ7	Long-chain-fatty-acid--CoA ligase 3	ACSL3	647					23	23	21	42.6	42.6	40	79.643	125.81	7448100000	35	145	27.6398	27.5744	27.6625	27.8474	27.761	27.6561	27.5953	27.5516
	1.48608	-0.243385	A0A7P0TA85;P35613;A0A087WUV8;A0A7P0TB04;A0A7P0T8A7;I3L192;R4GMX5;R4GN83	A0A7P0TA85;P35613;A0A087WUV8;A0A7P0TB04;A0A7P0T8A7;I3L192	Basigin	BSG	649					8	8	8	43.6	43.6	43.6	28.991	113.54	5185600000	13	80	26.7374	26.8827	26.9233	26.628	27.1885	27.052	26.9596	26.9449
	1.53531	-0.105975	A0A7P0TAE1;H0YIV0;A0A7P0TAT8;P14625;A0A7P0T823;A0A087WT78;A0A7P0T917;A0A7P0TAY2;A0A7P0TBC2;A0A7P0T8R3;A0A7P0T885;A0A7P0Z405;Q58FF3;F8W026	A0A7P0TAE1;H0YIV0;A0A7P0TAT8;P14625;A0A7P0T823;A0A087WT78;A0A7P0T917;A0A7P0TAY2;A0A7P0TBC2	Endoplasmin	HSP90B1	650					42	42	41	59.2	59.2	57.7	90.75	323.31	141250000000	43	586	30.8452	30.8389	30.8679	30.7818	30.9254	31.0127	30.8586	30.961
	0.659376	-0.0801892	P27824;A0A7P0TAE9;A0A7P0TB65;A0A7P0T840;A0A7P0T937;A0A7P0T8G1;A0A7P0T9L0;A0A7P0Z484;D6RGY2;A0A7P0Z4D6;A0A7P0TAR9;A0A7P0Z4H2;A0A7P0TAN9;A0A7P0T8N1;D6RAU8;D6RFL1;D6RAQ8;D6RD16;A0A7P0TA04;A0A7P0T9S4;A0A7P0T9S1	P27824;A0A7P0TAE9;A0A7P0TB65;A0A7P0T840;A0A7P0T937;A0A7P0T8G1;A0A7P0T9L0;A0A7P0Z484;D6RGY2;A0A7P0Z4D6;A0A7P0TAR9	Calnexin	CANX	651					31	31	31	43.4	43.4	43.4	67.567	323.31	106350000000	32	554	30.1852	30.2685	30.0871	30.1707	30.3824	30.2132	30.262	30.1747
	0.68599	-0.124922	A0A7P0TAG1;A0A7P0TAX2;A0A7P0TBE2;P10515;E9PEJ4;A0A7P0Z4G4;A0A7P0T997;H0YDD4;A0A7P0TBK2;A0A7P0TA47;A0A7P0Z423;A0A7P0T9N8;A0A7P0Z459	A0A7P0TAG1;A0A7P0TAX2;A0A7P0TBE2;P10515;E9PEJ4;A0A7P0Z4G4;A0A7P0T997;H0YDD4;A0A7P0TBK2;A0A7P0TA47	Dihydrolipoyllysine-residue acetyltransferase component of pyruvate dehydrogenase complex, mitochondrial;Acetyltransferase component of pyruvate dehydrogenase complex	DLAT	652					13	13	13	29.8	29.8	29.8	64.785	56.207	2544500000	33	98	25.5662	25.7446	25.7889	25.9023	26.0088	25.8393	25.7532	25.9006
	3.33366	-0.225077	A0A7P0TAL9;P19525;A0A7P0TBA9;A0A7P0Z4M0	A0A7P0TAL9;P19525;A0A7P0TBA9;A0A7P0Z4M0	Interferon-induced, double-stranded RNA-activated protein kinase	EIF2AK2	653					13	13	13	28.5	28.5	28.5	56.247	77.805	3649800000	21	92	26.4619	26.4443	26.3677	26.4087	26.6822	26.6885	26.5803	26.6319
	4.02542	-0.24652	P08195;A0A7P0Z4P5;J3KPF3;A0A7P0TAN7;A0A7P0Z4A0;F5GZS6;A0A7P0T9F7;A0A7P0TBF8;F5H056;F5GZI0;A0A7P0TAS6;A0A7P0T8U7;A0A7P0T8F1;H0YH36;A0A7P0TAT7;H0YFS2;F5H0E2;A0A7P0T853;F5H867;H0YFX4;F5GZR9	P08195;A0A7P0Z4P5;J3KPF3;A0A7P0TAN7;A0A7P0Z4A0;F5GZS6;A0A7P0T9F7;A0A7P0TBF8;F5H056;F5GZI0;A0A7P0TAS6;A0A7P0T8U7;A0A7P0T8F1;H0YH36	4F2 cell-surface antigen heavy chain	SLC3A2	654					24	24	24	44.4	44.4	44.4	67.993	323.31	169730000000	29	381	30.7257	30.6909	30.7413	30.6447	30.9028	30.9553	30.9504	30.9803
	1.45413	-0.211438	A0A7P0TAQ9;A0A7P0Z431;Q8IXB1;A0A7P0TB97;A0A7P0Z4F2;A0A494C1G5;A0A7P0TB83;A0A7P0T9B7;A0A7P0TB22;E7EP04;A0A7P0T8Y3;H7C1G0	A0A7P0TAQ9;A0A7P0Z431;Q8IXB1;A0A7P0TB97	DnaJ homolog subfamily C member 10	DNAJC10	655					10	10	10	15.2	15.2	15.2	87.996	36.711	797530000	32	32	24.7709	24.6434	24.493	24.6612	24.7475	24.8195	25	24.8472
	2.68477	-0.3022	P55072;A0A7P0TAW3;A0A7I2V540;C9JUP7;A0A7P0T8A3;A0A7P0T8Q5;A0A7P0TAQ1;A0A7P0Z4C6;A0A7I2V2Y2;A0A7I2V5G8;A0A7P0TAY0;A0A7P0T9X5;A0A7P0TA22;A0A7P0TBK7;A0A7P0Z4D1;A0A7P0T946;A0A7P0T971;A0A7P0T8D6;A0A7P0T8Q4;A0A7I2YQJ0	P55072;A0A7P0TAW3;A0A7I2V540;C9JUP7;A0A7P0T8A3;A0A7P0T8Q5;A0A7P0TAQ1;A0A7P0Z4C6;A0A7I2V2Y2	Transitional endoplasmic reticulum ATPase	VCP	656					49	49	49	65.4	65.4	65.4	89.321	323.31	131420000000	45	775	29.7332	29.8769	29.7037	29.7117	29.9517	30.0466	30.1532	30.083
	2.18145	0.219438	A0A7P0Z497;P23284;A0A7P0TB45;A0A7P0T7U3	A0A7P0Z497;P23284;A0A7P0TB45	Peptidyl-prolyl cis-trans isomerase B	PPIB	658					11	11	11	54.7	54.7	54.7	20.21	129.54	43870000000	11	180	29.8678	29.8322	29.862	29.8945	29.7483	29.5826	29.7175	29.5304
	0.721956	-0.10016	A0A7P0Z4B9;Q16531;A0A7P0T965;A0A7P0Z3Z5;A0A7P0TAK7;A0A7P0T870;A0A7P0TB30;F5GY55;A0A7P0Z4L2;F5H2L3;F5GZY8;A0A7P0TAX4;F5H198	A0A7P0Z4B9;Q16531;A0A7P0T965;A0A7P0Z3Z5;A0A7P0TAK7;A0A7P0T870;A0A7P0TB30;F5GY55	DNA damage-binding protein 1	DDB1	659					33	33	21	36.2	36.2	25.5	123.28	183.27	11234000000	54	218	27.6271	27.5285	27.5688	27.7493	27.8497	27.7274	27.6597	27.6375
	2.20115	-0.261662	E7EX90;A0A7P0Z4C3;A0A804CDA6;Q14203;Q6AWB1;E7EWF7;C9JZA4;C9JTE5;C9JJN7;C9JJD0;C9JKG6;E9PCY0;C9J1B7	E7EX90;A0A7P0Z4C3;A0A804CDA6;Q14203;Q6AWB1	Dynactin subunit 1	DCTN1;DKFZp686E0752	660					32	32	32	35.8	35.8	35.8	139.09	227.1	9597800000	60	221	26.4369	26.4312	26.2009	26.4657	26.623	26.6818	26.6657	26.6108
	0.931166	-0.126812	A0A7P0Z4F9;P55265;A0A7P0Z4K3;A0A3B3ISU1	A0A7P0Z4F9;P55265;A0A7P0Z4K3;A0A3B3ISU1	Double-stranded RNA-specific adenosine deaminase	ADAR	661					27	27	2	41.1	41.1	3.7	101.54	122.32	6960200000	56	174	26.451	26.5559	26.3701	26.4924	26.4224	26.6623	26.6469	26.645
	1.11432	0.377319	A0A804F6T5;A0A804F729;P30613	A0A804F6T5;A0A804F729			663					40	4	1	71	8.5	3.2	61.593	15.736	996100000	37	24	25.4638	25.6857	26.2079	25.712	25.3802	25.3105	25.2489	25.6204
	0.130595	-0.051435	O95630;A0A804HJC8;A0A804HL27;A0A804HKA6;A0A804HJS0;A0A804HHU9;A0A804HIJ2;A0A804HII8;A0A804HHV2;F5H5B9;A0A804HJ64;A0A804HI64;A0A804HIF8;C9JK83;A0A804HIV0;A0A804HKL2;C9JEK5;A0A804HL38	O95630;A0A804HJC8;A0A804HL27;A0A804HKA6;A0A804HJS0;A0A804HHU9;A0A804HIJ2;A0A804HII8;A0A804HHV2;F5H5B9;A0A804HJ64;A0A804HI64;A0A804HIF8;C9JK83;A0A804HIV0;A0A804HKL2	STAM-binding protein	STAMBP	665					6	6	6	21.2	21.2	21.2	48.076	17.051	1143500000	23	31	25.7897	25.7937	25.3279	25.4144	25.4561	25.5265	25.7669	25.7819
	2.38639	-0.353191	Q9BTW9;A0A804HHW7;A0A804HJY5;A0A804HIN6;A0A804HLI2;A0A804HIU1;A0A804HL62;J3KR97;A0A804HLF8;A0A804HJ32;A0A804HI57;A0A804HKT8;A0A804HJ57;A0A804HI02;A0A804HJU6;A0A804HIC0;A0A804HL21;A0A0J9YVR1;A0A0J9YWI5;I3L439;A0A804HKB9;I3L163;I3L143;I3L0V3;I3L131;I3L3H4;I3L4D2;I3L120;A0A0J9YXU4;A0A804HJ99;A0A0J9YVU1;I3L1S3;A0A804HJL5;A0A0J9YYG2;A0A0J9YY08	Q9BTW9;A0A804HHW7;A0A804HJY5;A0A804HIN6;A0A804HLI2;A0A804HIU1;A0A804HL62;J3KR97;A0A804HLF8;A0A804HJ32;A0A804HI57;A0A804HKT8;A0A804HJ57;A0A804HI02;A0A804HJU6;A0A804HIC0	Tubulin-specific chaperone D	TBCD	666					22	22	22	29.1	29.1	29.1	132.6	130.44	4298000000	62	108	26.6747	26.5658	26.7761	26.741	27.0492	27.0461	27.1927	26.8823
	0.20021	-0.246047	A0A804HI94;A0A804HK09;A0A804HJY9;A0A804HJB3;A0A804HJ70;Q53GS7;A0A804HJ00;A0A804HIJ1	A0A804HI94;A0A804HK09;A0A804HJY9;A0A804HJB3;A0A804HJ70;Q53GS7;A0A804HJ00	Nucleoporin GLE1	GLE1	669					3	3	3	9.4	9.4	9.4	47.689	5.3797	85128000	17	6	22.1887	23.1369	22.9139	22.1122	23.7159	23.3498	22.2329	22.0373
	5.10241	-0.181297	P42704;A0A804HIN4;A0A804HKI2;A0A804HL40;A0A804HIG4;A0A804HLG8;A0A804HK30;A0A804HKJ0;A0A804HKR3;A0A804HI14;A0A804HJZ1;A0A804HI40;A0A804HIQ7;A0A804HHY9;A0A804HJI0;A0A804HJH8;C9JCA9;A0A804HK02;B8ZZ38;A0A804HIV5;A0A0C4DG06;A0A804HKX0;A0A804HKR5;A0A804HJA1;A0A804HKK7;A0A804HKX6;A0A804HLK8;A0A804HJG8;A0A804HI44;H7C3W8;A0A804HLL8;A0A0C4DG51;Q9NP80	P42704;A0A804HIN4;A0A804HKI2;A0A804HL40;A0A804HIG4;A0A804HLG8;A0A804HK30;A0A804HKJ0;A0A804HKR3;A0A804HI14;A0A804HJZ1;A0A804HI40;A0A804HIQ7;A0A804HHY9;A0A804HJI0;A0A804HJH8;C9JCA9;A0A804HK02;B8ZZ38	Leucine-rich PPR motif-containing protein, mitochondrial	LRPPRC	671					71	71	71	63.7	63.7	63.7	157.9	323.31	70732000000	90	778	28.4213	28.4464	28.4263	28.412	28.6181	28.6059	28.5791	28.6281
	1.98989	-0.428652	A0A804HL95;A0A804HJQ4;A0A804HJ08;Q9BSJ2;A0A804HI27;A0A804HJS9;A0A804HJH7;F2Z2B9;A0A804HK74;A0A804HLH6;A0A804HL05;R4GMM4	A0A804HL95;A0A804HJQ4;A0A804HJ08;Q9BSJ2;A0A804HI27;A0A804HJS9;A0A804HJH7;F2Z2B9	Gamma-tubulin complex component 2	TUBGCP2	673					7	7	7	12	12	12	97.258	21.659	634980000	50	36	24.6526	24.9558	24.707	24.8513	25.4533	25.191	25.2394	24.9977
	2.01768	0.580317	Q5TIG5;A8MQ02;J3KN01;A0A804HJ20;P55196;H0Y7R8;H0Y948	Q5TIG5;A8MQ02;J3KN01;A0A804HJ20;P55196	Afadin	MLLT4	674					3	3	3	2.7	2.7	2.7	189.15	4.0357	140910000	85	16	23.6793	23.1211	23.1162	23.1158	22.4901	22.7946	22.7315	22.6949
	1.19266	0.155622	Q9HCC0;A0A804HLJ9;A0A804HJ24;A0A804HK37;A0A804HJ84;A0A804HJ31;A0A804HL02;A0A804HKE8;A0A804HJL2;A0A804HJC1;A0A0S2Z5R4;A0A804HHS4;A0A804HIH3;D6RDF7;A0A804HJW5;D6R9R1;A0A0D9SFE9;A0A804HKH3;A0A804HJW2;A0A0G2JM88;D6RD67	Q9HCC0;A0A804HLJ9;A0A804HJ24;A0A804HK37;A0A804HJ84;A0A804HJ31;A0A804HL02;A0A804HKE8;A0A804HJL2;A0A804HJC1	Methylcrotonoyl-CoA carboxylase beta chain, mitochondrial	MCCC2	675					15	15	15	38.7	38.7	38.7	61.332	96.67	3486100000	28	122	25.9372	26.0153	25.9953	26.015	25.8608	25.7223	25.7456	26.0117
	0.53005	-0.610269	A0A804HL61;A0A804HJ66;Q9UKM7;H0YI64;A0A804HKS1;A0A804HJ23;H0YG20;A0A804HHU1;H0YGQ1;A0A804HK01;A0A804HK86;A0A804HL65;H0YGV7;A0A804HK28;A0A804HJW0;A0A804HIP1	A0A804HL61;A0A804HJ66;Q9UKM7;H0YI64;A0A804HKS1;A0A804HJ23;H0YG20;A0A804HHU1;H0YGQ1;A0A804HK01;A0A804HK86;A0A804HL65;H0YGV7	Endoplasmic reticulum mannosyl-oligosaccharide 1,2-alpha-mannosidase;alpha-1,2-Mannosidase	MAN1B1	676					9	9	9	20.9	20.9	20.9	79.322	25.686	687560000	33	28	24.6953	24.9878	22.7156	24.7013	24.8057	24.8769	24.7183	25.1402
+	2.48942	-1.91096	E7EQ61;A0A804HJ86;Q9GZZ9;C9J5W5;C9JRV9;E7EWE1;C9J0F6	E7EQ61;A0A804HJ86;Q9GZZ9;C9J5W5;C9JRV9;E7EWE1	Ubiquitin-like modifier-activating enzyme 5	UBA5	677					3	3	3	15.9	15.9	15.9	41.85	5.2829	433750000	16	16	22.5931	24.0645	23.0352	22.4709	25.2712	25.2545	24.6771	24.6048
	1.73939	-0.23666	A0A804HJA4;J3KN16;Q5VYK3;R4GMY1;R4GMY3;F6XAQ5	A0A804HJA4;J3KN16;Q5VYK3	Proteasome-associated protein ECM29 homolog	KIAA0368;ECM29	678					30	30	30	23	23	23	203.99	124.06	3565000000	93	133	25.6565	25.6714	25.6592	25.7374	25.9548	25.7112	26.0356	25.9696
	0.686623	-0.897145	A0A804HK76;A0A804HJC2;H7C5L4;A0A0C4DGA1	A0A804HK76			681					132	3	0	69.1	2	0	274.02	22.355	725000000	139	19	22.7289	25.0868	25.4217	25.1853	25.5634	25.579	25.5436	25.3252
	0.213561	-0.0275445	A0A804HKE7;E7EVA0;P27816;H7C4C5;B5MEG9;H0Y2V1;F8W9U4;H7C456;A0A0J9YVV8;A0A0J9YW37	A0A804HKE7;E7EVA0;P27816	Microtubule-associated protein;Microtubule-associated protein 4	MAP4	682					29	29	29	17.9	17.9	17.9	245.37	274.73	19376000000	126	227	27.7647	27.8127	27.694	27.6904	27.6422	27.7995	27.8171	27.8131
	1.12918	-0.252281	A0A804HKH9;O00170;A0A804HKL7;E9PMH2;A0A804HIX8;A0A804HJ38;V9GYQ3;A0A804HKK3;A0A804HJ46;A0A804HKP8	A0A804HKH9;O00170;A0A804HKL7;E9PMH2;A0A804HIX8;A0A804HJ38;V9GYQ3;A0A804HKK3;A0A804HJ46	AH receptor-interacting protein	AIP	683					11	11	11	52.7	52.7	52.7	35.847	104.64	2708400000	17	80	25.5353	25.7331	25.7037	25.3471	25.7218	25.7017	25.8786	26.0262
	1.5644	0.281827	A0A8C8KBL6;P23229;C9JXX7;H7BZ97	A0A8C8KBL6;P23229	Integrin alpha-6;Integrin alpha-6 heavy chain;Integrin alpha-6 light chain;Processed integrin alpha-6	ITGA6	684					10	10	10	14.2	14.2	14.2	117.8	29.028	1402600000	56	43	25.5791	25.3269	25.271	25.5225	25.1148	24.979	25.2254	25.253
	0.00172066	-0.000279903	A0A8C8MQ70;A0A8C8KGQ8;Q5T6F2;A0A804HJY7;A0A804HLD2;A2A305;A0A804HIV8;A0A804HIK1;A0A804HLJ4;Q5JV08	A0A8C8MQ70;A0A8C8KGQ8;Q5T6F2	Ubiquitin-associated protein 2	UBAP2	686					6	6	6	10.2	10.2	10.2	111.69	33.677	1428300000	29	49	25.4279	25.2563	25.4566	25.3233	25.3645	25.2907	25.3873	25.4227
	0.0871602	-0.0247345	A0A8C8MSB2;O00330;E9PLU0;E9PRI6;H0YD97	A0A8C8MSB2;O00330;E9PLU0;E9PRI6;H0YD97	Pyruvate dehydrogenase protein X component, mitochondrial	PDHX	688					2	2	2	5	5	5	47.287	38.685	455180000	22	15	25.2023	24.8861	24.9948	25.0116	25.2065	24.8707	24.9616	25.1549
	0.0146005	-0.0183535	H3BP52;A0A8C8P5L8;Q8IWI9	H3BP52;A0A8C8P5L8;Q8IWI9	MAX gene-associated protein	MGA	689					1	1	1	1.5	1.5	1.5	121.69	3.3477	63082000	56	10	22.0032	23.4799	22.536	22.8332	23.5998	22.3975	22.3661	22.5623
	1.08871	-0.234849	A0AV96;B7Z8Z7;D6R9D6;D6RBS9;D6REZ6;D6R9M7;D6RBP6;D6RA49;D6RFL5;D6RCT1;D6RF41;Q5T0W7;F8W9F8;Q9NQ94	A0AV96;B7Z8Z7;D6R9D6;D6RBS9;D6REZ6	RNA-binding protein 47	RBM47	690					11	11	9	28.7	28.7	25.5	64.098	69.059	2009300000	24	66	26.1608	25.9558	25.8743	26.1954	26.3553	26.3526	26.3781	26.0397
	0.413462	-0.0483379	A0AVT1;H0Y8S8	A0AVT1	Ubiquitin-like modifier-activating enzyme 6	UBA6	691					15	15	15	21.9	21.9	21.9	117.97	58.956	2449900000	56	86	25.9192	25.9685	25.7869	25.8785	25.8941	25.9052	25.9073	26.0399
+	3.58403	-0.471445	A0MZ66	A0MZ66	Shootin-1	KIAA1598	692					23	23	23	47.4	47.4	47.4	71.639	160.37	4622800000	37	144	25.7138	25.5506	25.6794	25.5764	26.1708	26.1936	26.0388	26.0029
	1.55517	-0.410669	M0R026;A1L0T0;M0QZX5;M0R1B5;E9PJS0;E9PL44	M0R026;A1L0T0	Acetolactate synthase-like protein	ILVBL	693					8	8	8	28.2	28.2	28.2	56.732	53.081	1418500000	21	42	25.5673	25.4151	25.2296	25.1149	25.6839	25.4943	25.9705	25.8209
	0.370274	0.494355	A1X283;G3V144;A0A1B0GUF2	A1X283;G3V144;A0A1B0GUF2	SH3 and PX domain-containing protein 2B	SH3PXD2B	694					5	5	5	7.5	7.5	7.5	101.58	5.3439	389800000	46	8	24.6586	22.6919	24.4834	22.8406	23.569	23.178	23.4801	22.47
	2.42166	0.359832	A2A274;Q99798;A0A7I2V3U0;A0A7I2V586;A0A7I2V5T4;A0A7I2V3F1;A0A7I2V5A1;A0A7I2V614;A0A7I2V538;A0A7I2V6A6;A0A7I2V4I8;A0A7I2V5W7;A0A7I2V3C8;A0A7I2V3U7;A0A7I2V5U4;A0A7I2V2Y4	A2A274;Q99798;A0A7I2V3U0;A0A7I2V586;A0A7I2V5T4;A0A7I2V3F1;A0A7I2V5A1;A0A7I2V614;A0A7I2V538	Aconitate hydratase, mitochondrial	ACO2	695					26	26	26	46.6	46.6	46.6	87.819	227.64	9922200000	39	196	27.1195	27.0711	27.3191	27.1327	26.9295	26.678	26.7388	26.8567
	1.88669	0.559929	P04156;A2A2V1;X6RKS3	P04156;A2A2V1;X6RKS3	Major prion protein	PRNP	696					6	6	6	31.2	31.2	31.2	27.661	25.015	975420000	12	36	26.0353	25.3791	25.6415	25.7726	25.3974	25.0529	25.0949	25.0435
	0.0685807	-0.156536	Q5TCT4;A2A2V2;P42696;H7C5M1	Q5TCT4;A2A2V2;P42696	RNA-binding protein 34	RBM34	697					5	5	5	35.1	35.1	35.1	24.079	19.898	423240000	13	17	24.3566	25.4737	23.8274	23.2672	25.4202	24.7674	24.927	22.4366
	0.974435	-1.58615	A2AAT0;Q92504	A2AAT0;Q92504	Zinc transporter SLC39A7	SLC39A7	699					1	1	1	5.9	5.9	5.9	24.003	6.7335	731260000	6	8	23.1376	24.1129	22.1773	24.4017	25.514	23.0856	26.0453	25.5292
	0.449709	-0.545461	A2IDA3;P29372	A2IDA3;P29372	DNA-3-methyladenine glycosylase	MPG	701					3	3	3	24.3	24.3	24.3	27.295	9.0217	451910000	13	16	24.8849	24.4095	24.9443	22.6448	24.7756	24.6026	24.7137	24.9735
	0.323147	0.143489	A2IDC7;Q4TT37;A2IDC6;Q13084	A2IDC7;Q4TT37;A2IDC6;Q13084	39S ribosomal protein L28, mitochondrial	MRPL28	702					4	4	4	27.8	27.8	27.8	23.146	6.2848	1403200000	9	48	25.769	25.7289	25.6894	25.5979	26.0855	25.3778	25.4994	25.2485
	0.302329	-0.330667	Q5QPD2;A3KFJ1;Q5QPD4;A3KFJ0;O14965;A3KFJ2;Q5QPD1	Q5QPD2;A3KFJ1;Q5QPD4;A3KFJ0;O14965;A3KFJ2;Q5QPD1	Aurora kinase A	AURKA	703					2	2	2	17.8	17.8	17.8	16.077	2.2862	114560000	9	7	23.1064	22.1876	22.6198	24.2378	23.6362	23.1437	23.5268	23.1675
	1.46785	-0.693324	A3KMH1	A3KMH1	von Willebrand factor A domain-containing protein 8	VWA8	704					5	5	5	4.2	4.2	4.2	214.82	9.4101	329360000	111	12	23.0091	23.7702	23.7917	23.1311	24.1391	23.778	24.0656	24.4928
	0.693182	-0.891071	A4D1E9;C9JEQ8	A4D1E9	GTP-binding protein 10	GTPBP10	705					3	3	3	11.6	11.6	11.6	42.932	6.9062	378730000	26	11	23.2838	22.5891	23.0887	23.3542	24.5761	22.1881	24.7432	24.3726
	0.434799	0.162642	A5YKK6;H3BVC9;H3BR89;H3BMH0;H3BMZ2;H3BT18;H3BU44	A5YKK6	CCR4-NOT transcription complex subunit 1	CNOT1	707					24	24	24	14.1	14.1	14.1	266.94	124.1	2360400000	122	97	25.4941	26.0225	25.4081	25.9511	25.382	25.6116	25.6322	25.5995
	0.155704	-0.219007	H3BTL1;Q9GZQ8;A6NCE7;Q9H492	H3BTL1;Q9GZQ8;A6NCE7;Q9H492	Microtubule-associated proteins 1A/1B light chain 3B;Microtubule-associated proteins 1A/1B light chain 3 beta 2;Microtubule-associated proteins 1A/1B light chain 3A	MAP1LC3B;MAP1LC3B2;MAP1LC3A	710					2	2	2	28	28	28	9.0115	3.9975	665590000	4	20	25.3446	23.5047	25.6819	25.5354	24.9211	25.3041	25.0053	25.7121
	1.4623	-0.160879	A6NDG6;H3BV17	A6NDG6	Phosphoglycolate phosphatase	PGP	711					8	8	8	29.6	29.6	29.6	34.006	29.781	1785300000	18	55	25.5724	25.7075	25.5533	25.5284	25.7734	25.8023	25.6229	25.8066
	0.541847	-0.843329	A6NDU8;A0A0C4DGW6	A6NDU8	UPF0600 protein C5orf51	C5orf51	712					4	4	4	20.7	20.7	20.7	33.62	44.769	549960000	17	11	22.5341	25.5339	25.1065	25.4642	25.6822	25.3693	25.2832	25.6773
	0.48078	0.146805	G3V2I3;A6NED2	G3V2I3;A6NED2	RCC1 domain-containing protein 1	RCCD1	713					2	2	2	7.5	7.5	7.5	39.906	3.0354	293250000	19	3	23.8991	24.4927	24.1939	24.172	23.9139	23.9613	24.0806	24.2147
	2.05792	-0.21518	A6NEM2;P51610;H7C1C4;Q9Y5Z7	A6NEM2;P51610	Host cell factor 1;HCF N-terminal chain 1;HCF N-terminal chain 2;HCF N-terminal chain 3;HCF N-terminal chain 4;HCF N-terminal chain 5;HCF N-terminal chain 6;HCF C-terminal chain 1;HCF C-terminal chain 2;HCF C-terminal chain 3;HCF C-terminal chain 4;HCF C-terminal chain 5;HCF C-terminal chain 6	HCFC1	715					24	24	24	14.6	14.6	14.6	213.47	146.16	4712000000	77	168	25.9123	25.9113	25.8039	25.875	26.0841	26.2317	26.0503	25.9973
	0.100496	0.144907	Q8NG11;A6NEP9;H7BXY6	Q8NG11;A6NEP9;H7BXY6	Tetraspanin-14;Tetraspanin	TSPAN14	716					2	2	2	10.4	10.4	10.4	30.69	38.06	842940000	12	19	25.619	25.8172	25.4344	25.7278	26.4514	25.6696	25.8813	24.0166
	0.596997	0.732272	A6NFI3	A6NFI3	Zinc finger protein 316	ZNF316	717					3	3	3	4.7	4.7	4.7	108.44	2.5926	37943000	39	7	23.4095	22.6721	23.4271	22.2165	20.982	23.295	21.8844	22.6349
	1.18685	-0.13975	A6NFX8;Q9UKK9;A6NJU6;A6NCQ0;H0YEY4;C9JYY9	A6NFX8;Q9UKK9;A6NJU6;A6NCQ0	ADP-sugar pyrophosphatase	NUDT5	718					11	11	11	58.2	58.2	58.2	25.895	84.609	8236600000	12	126	27.1842	27.0404	27.1039	27.166	27.313	27.3417	27.1085	27.2904
	0.803997	1.37708	K7EIJ0;K7ENL2;A6NG10;K7EMC9;Q969T9;K7EIN1;K7ESN4;K7EIK1	K7EIJ0;K7ENL2;A6NG10;K7EMC9;Q969T9;K7EIN1;K7ESN4	WW domain-binding protein 2	WBP2	719					4	4	4	20.4	20.4	20.4	18.224	10.562	723960000	8	17	25.6433	25.5814	26.1025	25.7616	23.3776	25.9601	22.5549	25.688
	0.557077	1.40334	A6NGJ0;P51808;F2Z328	A6NGJ0;P51808;F2Z328	Dynein light chain Tctex-type 3	DYNLT3	720					2	2	2	33.6	33.6	33.6	16.979	14.942	884380000	5	17	26.4226	26.3854	26.1462	23.6412	22.1799	25.9181	25.8557	23.0285
	0.825174	-0.0805421	A6NGP5;Q9H910;H3BMV3;H3BTV5;H3BMM8;B4E1P3	A6NGP5;Q9H910;H3BMV3;H3BTV5	Hematological and neurological expressed 1-like protein	HN1L	721					8	8	2	61.2	61.2	15.2	18.906	64.264	9446400000	10	128	27.7416	27.7251	27.797	27.7388	27.7645	27.7393	27.9144	27.9064
	0.523525	0.899035	E9PIZ0;C9JST7;A6NGW1;O95070	E9PIZ0;C9JST7;A6NGW1;O95070	Protein YIF1A	YIF1A	722					1	1	1	7.5	7.5	7.5	17.627	11.058	832230000	6	13	25.6948	25.6775	25.4874	25.8031	22.4048	25.6766	25.5736	25.4116
	0.868936	3.10351	A6NHL2;REV__P16050	A6NHL2	Tubulin alpha chain-like 3	TUBAL3	723					4	2	2	9.2	5.6	5.6	49.908	5.6197	1662400000	24	10	28.764	22.3703	22.8578	28.6773	22.6958	23.1865	22.7887	21.5844
	0.867976	-0.778095	A6NHQ2	A6NHQ2	rRNA/tRNA 2-O-methyltransferase fibrillarin-like protein 1	FBLL1	724					5	2	2	15	3.6	3.6	34.803	3.8106	926830000	19	10	24.2493	25.5912	25.9731	26.0679	25.8889	26.4071	26.6276	26.0704
	0.556334	-2.33036	A6NHR9;J3KTL8;J3QSH1;A0A2R8YE92	A6NHR9;J3KTL8	Structural maintenance of chromosomes flexible hinge domain-containing protein 1	SMCHD1	725					8	8	8	6	6	6	226.37	8.1733	8651200000	109	14	29.7969	21.9702	29.816	29.6597	29.7041	30.2555	30.2572	30.3474
	1.7433	-0.411303	A6NJ78;A0A0U1RRF2;B5MC64;A0A0U1RR64;A0A0U1RRD2;F8WD83;A0A0U1RR76	A6NJ78	Probable methyltransferase-like protein 15	METTL15	727					3	3	3	9.6	9.6	9.6	46.121	9.8658	175050000	22	16	23.0639	22.9127	22.9988	23.13	23.3712	23.6232	23.1295	23.6267
	0.225935	0.621169	A6NLH6;Q9P003	A6NLH6;Q9P003	Protein cornichon homolog 4	CNIH4	730					1	1	1	14.6	14.6	14.6	15.771	15.621	1053300000	2	13	23.7075	26.3636	26.2842	26.2003	23.8785	26.8662	26.1959	23.1304
	0.542409	0.312272	A6NMA8;O95825;H7C3S0;C9JQD0;C9K0F7;C9JAL0;F8WF64;H7C3I5;A6NND8;A6NHJ8;C9JZK8	A6NMA8;O95825;H7C3S0;C9JQD0;C9K0F7;C9JAL0;F8WF64;H7C3I5;A6NND8;A6NHJ8	Quinone oxidoreductase-like protein 1	CRYZL1	731					3	3	3	14.1	14.1	14.1	37.061	7.4129	306560000	18	16	24.4002	24.5443	23.9398	24.914	24.6231	24.0644	24.0777	23.7841
	1.8751	-0.323312	E9PJK1;E9PRJ8;H0YDL9;H0YDJ9;E9PIF1;A6NMH8;P60033;E9PM31;H0YEE2	E9PJK1;E9PRJ8;H0YDL9;H0YDJ9;E9PIF1;A6NMH8;P60033	Tetraspanin;CD81 antigen	CD81	732					3	3	3	35.8	35.8	35.8	17.963	178.77	1449400000	5	28	26.2283	26.3526	26.1048	25.9775	26.5492	26.4442	26.5829	26.3801
	1.06366	-1.87291	A6NMQ1;P09884	A6NMQ1;P09884	DNA polymerase;DNA polymerase alpha catalytic subunit	POLA1	735					3	3	3	2.2	2.2	2.2	166.46	5.4162	1919300000	72	25	27.0368	26.9546	23.2971	26.8056	27.785	27.8085	28.1507	27.8417
	0.665394	-0.139703	A6NMQ3;Q5T5H1;O43768;A0A1W2PRU0	A6NMQ3;Q5T5H1;O43768;A0A1W2PRU0	Alpha-endosulfine	ENSA	736					6	6	5	51.4	51.4	43.6	15.634	38.471	2205200000	9	70	25.8014	25.4645	25.8658	25.5591	25.8302	25.8568	25.8455	25.7172
	1.00534	-0.249721	A6NNK5;Q12888;C9JXV0;H7BZY0;M0R142;H7C3N7	A6NNK5;Q12888;C9JXV0	Tumor suppressor p53-binding protein 1	TP53BP1	737					15	15	15	11.8	11.8	11.8	209.02	74.989	1149500000	88	58	24.7864	24.5621	24.8452	24.312	24.9196	24.8255	24.9677	24.7919
+	5.2894	-0.501665	Q99829;F2Z2V0;A6PVH9;E7ENH5;B0QZ18;Q5JX45;Q5JX60;Q5JX58;Q5JX59;Q5JX44;Q5JX52;Q5JX61;Q5JX56;Q5JX54;Q5JX55;E7EV27;Q5JX57;H0Y524;Q5JX53	Q99829;F2Z2V0;A6PVH9;E7ENH5;B0QZ18;Q5JX45;Q5JX60;Q5JX58;Q5JX59;Q5JX44;Q5JX52;Q5JX61;Q5JX56;Q5JX54;Q5JX55	Copine-1	CPNE1	738					9	9	9	17.7	17.7	17.7	59.058	22.819	1360700000	18	40	24.8228	24.8377	24.7431	24.8692	25.316	25.3708	25.3156	25.2772
+	1.92431	0.905073	A6PWM2;Q6UXH1	A6PWM2;Q6UXH1	Cysteine-rich with EGF-like domain protein 2	CRELD2	739					2	2	2	9.6	9.6	9.6	25.129	3.1319	59605000	12	4	23.6824	23.3454	23.7599	23.8301	22.6164	22.3162	22.6644	23.4006
	0.0871871	0.0804267	A6QL63;H0YHR1;C9JV03	A6QL63;H0YHR1	Ankyrin repeat and BTB/POZ domain-containing protein BTBD11	BTBD11	740					3	3	3	5.2	5.2	5.2	120.88	4.6818	130250000	50	9	23.6206	23.4611	23.891	22.9871	22.7084	23.855	23.8457	23.229
	0.382476	-0.157077	Q96HA1;A8CG34;A6NF01	Q96HA1;A8CG34	Nuclear envelope pore membrane protein POM 121;Nuclear envelope pore membrane protein POM 121C	POM121;POM121C	742					3	3	3	3.2	3.2	3.2	127.72	23.231	244680000	37	19	23.747	23.7171	24.0289	23.2198	24.0135	23.7317	23.7784	23.8176
	1.33593	-0.31056	A8MQB8;G3V0J0;Q06787;A0A087WXI3;R9WNI0;A0A087WWR6;Q8IXW7;A0A087WY29	A8MQB8;G3V0J0;Q06787;A0A087WXI3;R9WNI0	Fragile X mental retardation protein 1	FMR1	743					9	7	7	19.2	14.6	14.6	65.821	50.034	821770000	30	55	25.5362	25.1707	25.1358	25.0785	25.577	25.4017	25.7132	25.4715
	0.310016	-0.06041	H7BY10;K7EJV9;K7ERT8;A8MUS3;P62750;K7EMA7	H7BY10;K7EJV9;K7ERT8;A8MUS3;P62750;K7EMA7	60S ribosomal protein L23a	RPL23A	746					7	7	7	42.4	42.4	42.4	17.692	85.798	34462000000	6	155	30.0904	30.2325	30.1716	30.0849	30.4277	30.1319	30.1289	30.1326
	1.65005	-0.520204	Q49AN9;F5H013;P62308;A8MWD9	Q49AN9;F5H013;P62308;A8MWD9	Small nuclear ribonucleoprotein G;Putative small nuclear ribonucleoprotein G-like protein 15	SNRPG;SNRPGP15	749					2	2	2	20.3	20.3	20.3	7.1013	31.903	1769700000	2	30	26.4217	26.4982	26.0595	26.5032	26.4949	27.0445	26.9616	27.0624
	0.462987	0.201252	A8MX49;P49593;B5MCT7;C9J2F3	A8MX49;P49593;B5MCT7;C9J2F3	Protein phosphatase 1F	PPM1F	751					5	5	5	23	23	23	40.148	10.696	238470000	17	20	23.5524	24.0781	23.6597	24.1391	23.8315	23.6814	23.8293	23.2821
+	4.91896	-1.33274	A8MZB2;P61599	A8MZB2;P61599	N-alpha-acetyltransferase 20	NAA20	754					4	4	4	31.9	31.9	31.9	18.857	5.4687	367820000	8	12	23.5955	23.5269	23.4118	23.4595	24.7257	24.9464	24.6264	25.0263
+	2.79985	-1.29364	J3QKW7;A8MZF9;P55039;J3QLF3;J3QL90;J3KRL5;J3QR71;J3QKV7;J3QRI9	J3QKW7;A8MZF9;P55039;J3QLF3;J3QL90;J3KRL5;J3QR71;J3QKV7;J3QRI9	Developmentally-regulated GTP-binding protein 2	DRG2	755					2	2	2	8.2	8.2	8.2	26.624	2.8353	152290000	11	7	23.5673	23.5564	22.9356	22.693	24.4554	24.2758	24.6912	24.5045
	0.989222	-0.314269	E9PCT1;A9Z1X7;Q8IYB3;M0R088;M0R1E7;M0QXG5	E9PCT1;A9Z1X7;Q8IYB3;M0R088	Serine/arginine repetitive matrix protein 1	SRRM1	756					7	7	7	7.8	7.8	7.8	93.435	14.771	2058200000	40	44	26.0575	26.1695	26.3081	26.1113	26.0186	26.5846	26.6095	26.6906
	0.613857	-0.62784	B0QY35;B0QY34;H7BYT1;P48730;P49674;B0QY36;H0Y645;A0A669KBC0;J3QQI9;H0Y2N6;B4DLF1	B0QY35;B0QY34;H7BYT1;P48730;P49674;B0QY36;H0Y645;A0A669KBC0;J3QQI9	Casein kinase I isoform delta;Casein kinase I isoform epsilon	CSNK1E;CSNK1D	758					4	4	4	15.1	15.1	15.1	36.084	6.5388	472860000	17	9	24.5318	24.9561	24.3683	22.7643	24.7321	24.9985	24.7045	24.6967
	0.44218	-0.0820799	B0QY89;Q9Y262;B0QY90;C9JHP4;C9K0Q7;H7C3A0;H0Y7E6	B0QY89;Q9Y262;B0QY90	Eukaryotic translation initiation factor 3 subunit L	EIF3L	759					23	23	23	43.8	43.8	43.8	70.901	210.01	13213000000	30	245	26.7974	27.052	26.8159	26.8673	27.1165	26.8687	27.0028	26.8728
	0.200196	0.0948343	B0QYK0;Q01844;A0A0D9SFL3;C9JGE3;H7BY36	B0QYK0;Q01844;A0A0D9SFL3;C9JGE3;H7BY36	RNA-binding protein EWS	EWSR1	760					7	7	7	15.2	15.2	15.2	64.929	107.74	7941200000	17	98	27.6587	27.4242	27.1472	27.1429	26.848	27.3266	27.5042	27.3148
	0.93991	0.0879121	B0YIW6;P48444;Q6P1Q5;E9PK34	B0YIW6;P48444	Coatomer subunit delta	ARCN1	761					23	23	23	39.7	39.7	39.7	61.626	144.19	8708800000	29	204	27.4039	27.543	27.4702	27.4317	27.3002	27.4766	27.3573	27.363
	1.16252	-0.421778	B1AK81;Q92643;A6NEM5	B1AK81;Q92643;A6NEM5	GPI-anchor transamidase	PIGK	765					5	5	5	20.9	20.9	20.9	34.313	7.9854	1118900000	14	35	25.362	25.7823	25.6733	25.3799	25.6853	25.8999	26.425	25.8745
	0.49233	-0.0778503	B1AK88;B1AK87;P47756;B1AK85;A0A6I8PRV6;A0A6I8PIN8	B1AK88;B1AK87;P47756;B1AK85	F-actin-capping protein subunit beta	CAPZB	766					14	14	14	47.2	47.2	47.2	33.781	309.77	18430000000	17	182	28.4527	28.2792	28.2834	28.349	28.3415	28.5931	28.4	28.3411
+	1.69986	4.63251	Q5TZA2;B1AKD8;A0A087WW81	Q5TZA2;B1AKD8;A0A087WW81	Rootletin	CROCC	767					3	3	3	1.7	1.7	1.7	228.42	3.683	3819500000	112	14	28.3938	23.1847	29.2666	29.1664	23.1015	22.3549	22.5827	23.4424
	0.769372	-0.138939	B1AKR6;Q9NP97;H3BQI1;Q8TF09	B1AKR6;Q9NP97	Dynein light chain roadblock-type 1	DYNLRB1	768					4	4	4	39.9	39.9	39.9	16.253	49.725	3506300000	8	54	26.6613	26.6377	26.9933	26.7127	26.989	26.8486	26.8851	26.838
	0.27525	-0.0575352	H0Y6Y8;B1AL05;Q8N983;M0R051;H0YBU8	H0Y6Y8;B1AL05;Q8N983;M0R051	39S ribosomal protein L43, mitochondrial	MRPL43	769					5	5	5	36.7	36.7	36.7	18.657	7.8905	668700000	11	26	24.684	24.5974	24.7048	24.9393	24.8962	24.7278	24.834	24.6978
	2.76315	-0.328778	P60891;B1ALA9;A0A2R8Y7H4;P21108;A0A0B4J207;A0A6Q8PEU0;B1ALA7;A0A6Q8PHK9;A0A6Q8PG82;A0A6Q8PGP2;A0A6Q8PHI4;Q15244;A0A0A0MRQ9;A0A6Q8PGX9;A0A6Q8PG13;A0A6Q8PGF9;A0A6Q8PFD1;A0A6Q8PFD7;A0A6Q8PG31	P60891;B1ALA9;A0A2R8Y7H4	Ribose-phosphate pyrophosphokinase 1	PRPS1	770					13	13	6	50.6	50.6	24.5	34.834	179.11	11429000000	16	112	27.7475	27.6227	27.4932	27.7077	27.9606	28.0371	27.9191	27.9694
+	2.68915	-1.27069	B1AMS2;Q14141	B1AMS2;Q14141	Septin-6	2006-09-01	772					7	2	2	20.2	9.3	9.3	49.303	21.137	322370000	20	10	23.1012	23.3752	23.3183	22.5004	24.3067	24.2667	24.0656	24.7388
	0.706632	0.261687	B1AMU7;B1AMU3;Q9Y3B2;R4GNH9;R4GMQ7;B1AMU4	B1AMU7;B1AMU3;Q9Y3B2;R4GNH9;R4GMQ7;B1AMU4	Exosome complex component CSL4	EXOSC1	773					3	3	3	24.8	24.8	24.8	17.789	18.372	1138300000	7	22	26.1824	26.1568	25.7615	26.1589	25.4183	25.7178	26.0495	26.0272
	0.609544	-0.58741	B1ANH5;B1ANH0;B1ANH2;Q16774;B1ANG9;B1ANH6;B1ANH3	B1ANH5;B1ANH0;B1ANH2;Q16774;B1ANG9;B1ANH6;B1ANH3	Guanylate kinase	GUK1	774					2	2	2	17.1	17.1	17.1	21.999	5.3291	477410000	11	11	24.8048	23.0143	24.2412	24.8944	24.4723	25.1256	24.9882	24.7184
	1.20597	-0.916721	H3BLV0;B1AP13;H7BY55;P08174;B1AP15	H3BLV0;B1AP13;H7BY55;P08174;B1AP15	Complement decay-accelerating factor	CD55	776					6	6	6	19.6	19.6	19.6	35.695	19.221	403340000	19	17	23.3257	23.057	23.9768	24.8182	24.6192	24.9337	24.7389	24.5527
	0.0861148	-0.0150337	B1AXG1;B7ZB17;P51812;B4DG22;A0A2R8Y603;Q9UK32;A0A2R8Y7S9;D6R910;D6RHW7;D6RA62;D6RE03;V9GXZ1;E7ERL6;A0A669KBJ4;O60307;Q9Y2H9	B1AXG1;B7ZB17;P51812;B4DG22	Ribosomal protein S6 kinase alpha-3	RPS6KA3	778					17	17	12	33.9	33.9	26.3	80.75	68.591	5156200000	44	119	27.1671	27.1031	27.1286	27.2349	27.0106	27.2412	27.1852	27.2568
	0.276803	-0.0470839	B2WTI3;B2WTI4;K7EJU9;Q6NYC1	B2WTI3;B2WTI4;K7EJU9;Q6NYC1	Bifunctional arginine demethylase and lysyl-hydroxylase JMJD6	JMJD6	779					10	10	10	41.8	41.8	41.8	39.241	59.405	1653800000	15	55	25.2846	25.5012	25.4828	25.2968	25.4831	25.3202	25.47	25.4805
	0.157524	0.163085	B3KR61;Q5TEU4	B3KR61;Q5TEU4	NADH dehydrogenase [ubiquinone] 1 alpha subcomplex assembly factor 5	NDUFAF5	780					1	1	1	8.6	8.6	8.6	30.238	7.995	169150000	12	15	22.5159	24.1769	22.9974	23.861	23.1204	23.1212	23.1131	23.5442
	0.215251	0.0435152	C9J5N1;B3KSP9;Q9BTE6;K7EQ85;L7N2F4;K7N799;H7C054	C9J5N1;B3KSP9;Q9BTE6	Alanyl-tRNA editing protein Aarsd1	PTGES3L-AARSD1;AARSD1	781					11	11	11	29.7	29.7	29.7	55.065	37.419	2356500000	23	70	26.0722	25.9397	25.7843	25.8002	25.9157	25.7371	25.9309	25.8387
	0.264345	-0.141184	B3KTM8;Q9UBU8;H0YLJ3;H0YMJ0;H0YNE0;H0YLV1;H0YMT8;H0YM21	B3KTM8;Q9UBU8;H0YLJ3;H0YMJ0	Mortality factor 4-like protein 1	MORF4L1	782					6	6	5	29.6	29.6	25.9	40.028	36.684	845820000	19	31	24.5772	24.8422	24.9317	25.0361	24.8547	24.5401	25.0839	25.4732
	0.813272	-3.71905	B3KVZ3;H0Y9E6;Q9H3R5	B3KVZ3;H0Y9E6;Q9H3R5	Centromere protein H	CENPH	783					3	3	3	15.8	15.8	15.8	26.239	5.0065	12550000000	15	11	22.6438	22.4059	23.9385	23.0311	22.7388	30.8492	30.3965	22.911
	0.979507	0.538384	O14735;B3KY94;H3BUR9	O14735;B3KY94	CDP-diacylglycerol--inositol 3-phosphatidyltransferase	CDIPT	784					3	3	3	16	16	16	23.539	4.1677	173450000	7	9	23.6896	23.9543	23.9444	23.0624	22.8944	22.7511	23.5915	23.2602
	1.57277	-0.333662	B4DDF4;B4DUT8;Q99439;H3BVI6;A0A087X271;K7ES69;A0A087X1X5;H3BQH0;A0A087WV51;U3KPS3	B4DDF4;B4DUT8;Q99439;H3BVI6;A0A087X271;K7ES69;A0A087X1X5	Calponin;Calponin-2	CNN2	786					10	9	9	43.6	39.9	39.9	32.616	102.19	3655500000	14	90	25.9	25.8302	26.2071	25.8236	26.4375	26.0965	26.2883	26.2732
	0.880527	-1.29637	Q9Y6N1;B4DI26;I3L4E7	Q9Y6N1;B4DI26;I3L4E7	Cytochrome c oxidase assembly protein COX11, mitochondrial	COX11	788					2	2	2	16.7	16.7	16.7	31.43	17.961	445940000	15	9	23.0824	22.7369	22.4709	23.381	25.5557	25.0633	23.9036	22.3342
	0.178527	0.135732	H3BRY6;B4DVT3;B4DJL6;Q96SY0	H3BRY6;B4DVT3;B4DJL6;Q96SY0	von Willebrand factor A domain-containing protein 9	VWA9	789					4	4	4	10.5	10.5	10.5	51.583	8.5657	335420000	25	11	24.0115	24.0755	23.9933	23.9571	24.14	24.2833	22.9979	24.0733
	1.88577	-0.152205	O75390;B4DJV2;A0A0C4DGI3;H0YIC4;H0YH82;F8W1S4;F8VPF9;F8VPA1;F8VRP1;F8VX68;F8VRI6;F8W4S1;F8VR34;F8VTT8;F8W642;F8VWQ5;F8VX07;F8VZK9;F8VU34;F8W0J2	O75390;B4DJV2;A0A0C4DGI3	Citrate synthase, mitochondrial;Citrate synthase	CS	790					17	17	16	45.9	45.9	44	51.712	323.31	29088000000	19	258	28.5515	28.6123	28.4592	28.5019	28.6979	28.6118	28.7496	28.6743
	0.687099	-0.17716	Q13610;B4DJV5;F8VZ56	Q13610;B4DJV5	Periodic tryptophan protein 1 homolog	PWP1	791					7	7	7	17.4	17.4	17.4	55.827	105.11	2506200000	23	61	26.4544	26.2857	25.9379	25.9938	26.2728	26.3651	26.3517	26.3909
	1.07216	-0.100844	B4DKY1;P49589;E9PRS8;C9JLN0	B4DKY1;P49589	Cysteine--tRNA ligase, cytoplasmic	CARS	792					22	22	20	34.2	34.2	31	84.277	74.94	5108700000	40	166	25.965	25.9841	25.8715	25.9684	26.1515	26.0164	26.0694	25.955
	2.39072	-0.245092	B4DLN1;P52815;I3L1E8	B4DLN1			794					11	11	4	31	31	12.9	48.099	62.936	4886400000	21	93	27.7698	27.646	27.7931	27.823	28.0272	27.891	28.0344	28.0596
	0.00980459	-0.00522947	B4DQA8;K7EJC8;E9PCW1;O95249;G5E9T8;F6RU00	B4DQA8;K7EJC8;E9PCW1;O95249;G5E9T8	Golgi SNAP receptor complex member 1	GOSR1	796					8	8	8	48.9	48.9	48.9	20.045	17.335	1720200000	11	30	26.1214	26.0782	25.485	25.9622	26.1966	25.7493	25.9526	25.7691
	0.985442	0.302307	B4DR12;K7EIM7;K7EPJ5;O60291;K7ERA1;K7EJN3	B4DR12;K7EIM7;K7EPJ5;O60291;K7ERA1;K7EJN3	E3 ubiquitin-protein ligase MGRN1	MGRN1	798					3	3	2	13.1	13.1	10	36.181	6.896	123550000	18	13	23.6488	23.3559	23.2342	23.9237	23.2743	23.1712	23.2037	23.3042
	0.762086	-0.380919	B4DR61;P61619	B4DR61;P61619	Protein transport protein Sec61 subunit alpha isoform 1	SEC61A1	799					6	6	6	10.8	10.8	10.8	52.949	12.899	1175200000	16	38	26.2658	25.405	25.1801	25.4081	26.0497	25.8134	26.03	25.8896
	3.04387	-0.244868	B4DR80;Q9Y6E0;H0Y630;Q5JV98;Q5JV99;C9J6L2;C9JCC0;C9J232;H7C279;O00506;C9JDH9;C9JJV0	B4DR80;Q9Y6E0;H0Y630;Q5JV98	Serine/threonine-protein kinase 24;Serine/threonine-protein kinase 24 36 kDa subunit;Serine/threonine-protein kinase 24 12 kDa subunit	STK24	800					11	11	6	31.1	31.1	18.9	45.835	44.953	2031700000	21	74	25.7233	25.6601	25.5942	25.7125	25.9777	25.8497	25.9013	25.9408
	0.0279067	-0.0583348	B4DUA7;Q9NX70	B4DUA7;Q9NX70	Mediator of RNA polymerase II transcription subunit 29	IXL;MED29	804					2	2	2	19.9	19.9	19.9	23.472	11.22	375390000	12	18	24.4559	24.7487	22.1589	24.6778	24.5388	23.0409	24.5837	24.1113
	1.58397	-0.182156	B4DXZ6;P51114;E9PFF5;E7EU85;H7C4S4;C9JZE0;C9JY20;C9IZ22;C9JAJ4	B4DXZ6;P51114;E9PFF5;E7EU85	Fragile X mental retardation syndrome-related protein 1	FXR1	805					17	17	15	35.4	35.4	32.7	68.326	177.42	3350400000	27	102	25.8876	26.0814	25.8188	25.9681	26.1049	26.1309	26.1859	26.0627
	0.620306	0.210733	B4E0K5;Q16539;E7EX54;B5TY33;H7C4E2	B4E0K5;Q16539;E7EX54;B5TY33	Mitogen-activated protein kinase 14	MAPK14	807					7	7	7	31.1	31.1	31.1	32.357	43.579	749790000	15	36	25.1571	24.7435	24.6614	24.4479	24.4471	24.4227	24.6813	24.6159
	0.0588865	-0.13203	Q8NBY1;B4E0Y9;Q9P289	Q8NBY1;B4E0Y9;Q9P289	Serine/threonine-protein kinase 26	STK26	808					8	3	3	22.4	9.7	9.7	43.867	8.0834	259650000	22	11	24.846	23.6457	23.073	22.4192	24.774	24.5235	22.3253	22.8892
	0.831897	-1.21416	Q9BUN8;B4E1G1;E5RGY0	Q9BUN8;B4E1G1;E5RGY0	Derlin-1	DERL1	809					3	3	3	13.1	13.1	13.1	28.8	17.9	1998300000	11	20	26.7335	26.6716	23.8296	26.8115	27.1491	27.3675	27.1342	27.2521
	0.719441	0.0692792	B4E3T4;Q93062;H0YBU9;E5RJD7;H0YC46;E5RJ31;Q6ZRY4	B4E3T4;Q93062;H0YBU9	RNA-binding protein with multiple splicing	RBPMS	812					4	4	3	26.8	26.8	17.4	24.997	32.344	1071600000	11	39	25.468	25.4845	25.5306	25.5696	25.5231	25.4769	25.4447	25.3309
	1.33402	2.0698	B5MBX5;B5MCP4;Q53QV2	B5MBX5;B5MCP4;Q53QV2	Protein LBH	LBH	813					1	1	1	23.9	23.9	23.9	10.193	8.6209	396970000	4	6	23.0551	25.9023	24.0283	25.9287	21.5059	22.5808	23.2268	23.3216
	0.442288	-0.3305	B5MC35;B5MD16;B5MCA1;Q96G28	B5MC35;B5MD16;B5MCA1;Q96G28	Cilia- and flagella-associated protein 36	CFAP36	815					2	2	2	10.1	10.1	10.1	24.971	5.317	161170000	10	8	22.5929	23.7506	23.035	24.0542	23.5907	23.7412	23.7036	23.7192
+	3.39886	-0.493842	B5MCF9;O00541;B3KXD6;H7C267;H7BYY8	B5MCF9;O00541;B3KXD6	Pescadillo homolog	PES1	816					13	13	13	27	27	27	66.077	30.494	5261000000	30	76	27.5802	27.7137	27.6927	27.778	28.2926	28.1489	28.0429	28.2557
	2.13834	-0.222549	B5MDF5;P62826;J3KQE5;F5H018;H0YFC6;B4DV51;A0A087X0W0	B5MDF5;P62826;J3KQE5;F5H018;H0YFC6	GTP-binding nuclear protein Ran	RAN	818					12	12	12	45.1	45.1	45.1	26.224	251.17	65538000000	10	193	29.8669	30.0836	29.9521	29.9955	30.2445	30.2621	30.1524	30.1293
	1.74802	-0.391518	E7EW69;B5ME97;Q9P0V9;E7EX04;C9JEW2;C9JNR7;F5GYV2;F5H1W3;F8WC85;C9JEQ7;F5H1F2	E7EW69;B5ME97;Q9P0V9;E7EX04	Septin-10	2010-09-01	819					9	8	8	33.8	29.6	29.6	52.145	74.042	1171900000	22	43	24.6769	24.9499	24.7494	24.969	25.4947	25.134	25.0475	25.2351
	0.908438	0.202686	B7WPG3;C9IYN3;V9GYK2;Q8WVV9;H7C464;C9JJZ7;H7BXH8	B7WPG3;C9IYN3;V9GYK2;Q8WVV9;H7C464	Heterogeneous nuclear ribonucleoprotein L-like	HNRNPLL	821					8	8	8	22.6	22.6	22.6	56.45	20.692	1044500000	29	46	25.4501	25.02	25.1894	25.0908	25.1508	24.9945	24.9432	24.851
	0.807066	-0.167592	P14927;B7Z2R2;E5RHG9	P14927;B7Z2R2;E5RHG9	Cytochrome b-c1 complex subunit 7	UQCRB	822					5	5	5	35.1	35.1	35.1	13.53	11.201	2593200000	6	46	26.7159	26.7246	26.4798	26.9124	26.8684	26.9033	26.7374	26.9939
	0.573103	-0.0788965	H7C2W9;C9JU56;B7Z4E3;B7Z4C8;P62899;B8ZZK4	H7C2W9;C9JU56;B7Z4E3;B7Z4C8;P62899;B8ZZK4	60S ribosomal protein L31	RPL31	824					5	5	5	42.6	42.6	42.6	12.701	8.7952	17574000000	6	23	29.657	29.7916	29.8385	29.6696	29.6881	29.8389	29.8377	29.9077
	0.55353	0.502158	E7EPW5;G3XAH9;E9PCV1;B7Z4U3;B7Z4L1;E7ENZ9;C9JU30;E7EPD9;H7BXS2;Q9NRC1	E7EPW5;G3XAH9;E9PCV1;B7Z4U3;B7Z4L1;E7ENZ9;C9JU30;E7EPD9;H7BXS2;Q9NRC1	Suppressor of tumorigenicity 7 protein	ST7	826					1	1	1	3.1	3.1	3.1	58.067	2.5102	62149000	25	12	23.5227	21.4856	22.3892	22.3523	21.8696	22.1062	21.9535	21.812
	0.459759	0.518147	B7Z4M1	B7Z4M1	Reticulon	RTN3	827					1	1	1	12.2	12.2	12.2	12.747	34.189	852140000	3	19	25.6391	26.2694	25.1913	26.142	25.6284	25.7997	23.9664	25.7747
+	3.22397	-0.371551	B7Z6D5;Q96GQ7;A0A087X059;A0A087WYH5	B7Z6D5;Q96GQ7	Probable ATP-dependent RNA helicase DDX27	DDX27	828					21	21	21	37.5	37.5	37.5	86.604	65.359	2465500000	38	100	25.1271	25.327	25.1731	25.1951	25.6808	25.5543	25.5068	25.5667
	0.830623	-0.942431	B7Z6J7;O75175;A0A2R8Y691;A0A2R8Y4W0;A0A2R8Y7Z8;H0Y5X7;H7C148;H7C3F5;A0A2H2FJL5	B7Z6J7;O75175;A0A2R8Y691;A0A2R8Y4W0;A0A2R8Y7Z8;H0Y5X7;H7C148;H7C3F5;A0A2H2FJL5	CCR4-NOT transcription complex subunit 3	CNOT3	829					2	2	2	4.6	4.6	4.6	76.568	5.3069	395110000	17	7	22.9433	24.7366	23.6069	23.2271	23.3601	25.0087	24.8062	25.1088
	0.208664	-0.312703	B7Z7P0;Q14139	B7Z7P0;Q14139	Ubiquitin conjugation factor E4 A	UBE4A	830					2	2	2	7.4	7.4	7.4	62.002	4.8001	98273000	23	4	22.9694	23.2908	23.6341	22.7465	22.8777	22.3761	24.9598	23.6781
	1.04569	-0.221776	B7Z7P8;P62495;I3L492;D6RJE8;D6RCB3	B7Z7P8;P62495	Eukaryotic peptide chain release factor subunit 1	ETF1	831					14	14	14	40.9	40.9	40.9	47.475	180.82	6357300000	24	120	27.2912	27.0058	27.2434	27.5414	27.4911	27.496	27.4825	27.4993
	2.27267	-0.415311	B7Z896;F5H3M2;Q9BVG8;H3BTL6;A0A0C4DGM9;H3BMJ1;H3BTN1;H3BMR0;H3BV47;H3BTU1;H3BMQ3;H3BSN2;H3BUC0	B7Z896;F5H3M2;Q9BVG8;H3BTL6;A0A0C4DGM9	Kinesin-like protein;Kinesin-like protein KIFC3	KIFC3	832					10	10	9	16.1	16.1	14.5	76.714	19.78	917940000	41	44	24.2334	24.3688	24.1765	24.5274	24.8319	24.6339	24.8531	24.6484
	0.0488958	0.0123506	B7ZC38;Q9NR46;B7ZC39;F8WFB9	B7ZC38;Q9NR46;B7ZC39	Endophilin-B2	SH3GLB2	835					8	8	7	24	24	22	44.361	21.606	1694300000	18	50	25.6571	25.7014	25.3354	25.5077	25.5543	25.4481	25.5582	25.5918
	0.812767	-0.147423	B7ZLQ5;P28370;A0A0A0MRP6	B7ZLQ5;P28370;A0A0A0MRP6	Probable global transcription activator SNF2L1	SMARCA1	837					18	9	9	17.9	9.6	9.6	124.33	14.039	1124300000	57	32	24.9435	25.1684	25.0456	24.9537	25.3583	25.172	24.997	25.1736
	0.337579	0.206261	H7C171;C9JKY0;B8ZZ93;B8ZZH7;F8WCL7;J3KQ70;Q9C086	H7C171;C9JKY0;B8ZZ93;B8ZZH7;F8WCL7;J3KQ70;Q9C086	INO80 complex subunit B	INO80B;INO80B-WBP1	839					1	1	1	16.5	16.5	16.5	10.715	3.4272	64905000	6	9	23.3509	22.5849	23.0955	23.2014	22.2903	22.8935	22.9809	23.2429
	0.875529	0.292453	B8ZZQ6;B8ZZA1;B8ZZW7;H7C2N1;P06454	B8ZZQ6;B8ZZA1;B8ZZW7;H7C2N1;P06454	Prothymosin alpha;Prothymosin alpha, N-terminally processed;Thymosin alpha-1	PTMA	840					6	6	6	24.3	24.3	24.3	11.758	264.51	49513000000	3	163	31.822	31.109	31.2672	31.2788	30.951	31.2283	31.1348	30.9931
	1.96182	0.518629	B8ZZA8;B8ZZC5	B8ZZA8;B8ZZC5		GLS	841					4	2	2	37.3	20.1	20.1	18.634	116.39	1677900000	8	25	26.835	26.5264	26.9933	26.7213	26.3984	26.4586	26.0705	26.0741
	0.149746	-0.0886464	Q86VP1;B8ZZD4;H7C3L5	Q86VP1;B8ZZD4	Tax1-binding protein 1	TAX1BP1	842					6	6	6	7.9	7.9	7.9	90.876	11.376	669950000	46	30	25.1476	25.4288	24.4916	25.4167	25.2834	25.2267	25.2737	25.0555
	0.294216	-0.0596356	B8ZZN6;P63165;B8ZZJ0;B8ZZ67;B9A032;G2XKQ0	B8ZZN6;P63165;B8ZZJ0;B8ZZ67;B9A032;G2XKQ0	Small ubiquitin-related modifier 1;Small ubiquitin-related modifier	SUMO1	845					4	4	4	25.3	25.3	25.3	16.645	5.6482	2773300000	9	29	26.7936	26.9903	26.6573	26.9545	26.8043	26.9225	26.9601	26.9474
	0.867746	-0.163665	B8ZZU8;Q15370;I3L0M9;A0A0B4J296	B8ZZU8;Q15370;I3L0M9	Transcription elongation factor B polypeptide 2	TCEB2	846					9	9	9	64.6	64.6	64.6	12.527	59.479	7661800000	8	57	27.7589	27.467	27.8005	27.8247	27.8756	27.985	27.7598	27.8854
	0.504204	0.16256	B8ZZV5;Q8TCC3	B8ZZV5;Q8TCC3	39S ribosomal protein L30, mitochondrial	MRPL30	847					1	1	1	10.9	10.9	10.9	11.935	4.3077	668330000	5	24	25.17	25.6566	25.1899	25.6361	25.3452	25.0734	25.294	25.2897
	1.2758	-0.115592	B8ZZZ7;Q9NUQ6;C9JW67;F8W6C2;H7C2G5;C9JKE4;F8VZ02;F8VT91;C9JGM8	B8ZZZ7;Q9NUQ6	SPATS2-like protein	SPATS2L	848					8	8	8	20.7	20.7	20.7	54.945	23.925	1822800000	28	62	25.4972	25.37	25.3955	25.3342	25.5725	25.4379	25.567	25.4819
	0.286477	-0.147908	B9A008;E7ENR5;H0Y714;Q96G21;B8ZZ47	B9A008;E7ENR5;H0Y714;Q96G21;B8ZZ47	U3 small nucleolar ribonucleoprotein protein IMP4	IMP4	849					6	6	6	38.4	38.4	38.4	19.619	15.283	745790000	9	30	25.1151	24.1701	24.8389	24.8269	24.9798	24.8907	25.006	24.6662
	1.36618	-0.380337	J3KMX2;B9EGA3;Q92925;J3QWB6	J3KMX2;B9EGA3;Q92925;J3QWB6	SWI/SNF-related matrix-associated actin-dependent regulator of chromatin subfamily D member 2	SMARCD2	850					6	6	6	19.5	19.5	19.5	52.238	32.191	843650000	29	25	24.8714	25.0198	24.8467	25.0374	25.2713	25.7353	25.1388	25.1512
	1.49852	-0.196316	C4AMC7;Q6VEQ5;A8K0Z3;A8MWX3	C4AMC7;Q6VEQ5;A8K0Z3;A8MWX3	Putative WAS protein family homolog 3;WAS protein family homolog 2;WAS protein family homolog 1;Putative WAS protein family homolog 4	WASH3P;WASH2P;WASH1;WASH4P	851					4	4	2	11.4	11.4	5.4	49.994	8.7264	372170000	18	13	24.3833	24.402	24.4828	24.2841	24.5694	24.7269	24.5945	24.4468
	0.0223258	-0.00833845	C9J0I9;Q86WB0	C9J0I9;Q86WB0	Nuclear-interacting partner of ALK	ZC3HC1	853					5	5	5	13.5	13.5	13.5	50.562	22.052	614150000	28	29	24.724	24.5156	24.3212	24.7051	24.3202	24.6442	24.687	24.648
	0.413582	-0.121645	C9J0J7;G5E9Q6;C9JQ45;C9J2N0	C9J0J7;G5E9Q6;C9JQ45;C9J2N0	Profilin	PFN2	854					6	6	2	65.9	65.9	18.7	9.8402	89.072	4160600000	6	35	27.936	27.9226	27.8489	27.8384	27.6929	27.9144	28.1691	28.2562
	0.667081	-0.186853	C9J0K6;P30626;B4DHQ6	C9J0K6;P30626;B4DHQ6	Sorcin	SRI	855					11	11	11	70.3	70.3	70.3	17.605	30.638	3048600000	13	52	26.0679	26.5302	26.2832	26.1393	26.6374	26.4651	26.2087	26.4568
	1.6595	-0.876055	C9J164;Q70E73;C9K0J5	C9J164;Q70E73;C9K0J5	Ras-associated and pleckstrin homology domains-containing protein 1	RAPH1	856					3	3	3	12.5	12.5	12.5	67.176	9.9149	356740000	25	13	22.9904	23.2587	22.6418	23.8662	23.947	23.8453	24.3992	24.0697
	1.05892	-1.12477	C9J1C6;Q9P0P0	C9J1C6;Q9P0P0	E3 ubiquitin-protein ligase RNF181	RNF181	857					1	1	1	10.8	10.8	10.8	16.031	3.8095	395610000	7	8	25.3525	23.0754	23.5841	23.0406	24.8219	24.6826	24.9624	25.0847
	0.103389	-0.0201392	C9J2Y9;P30876;C9J4M6;C9JMN3;C9JZW8	C9J2Y9;P30876;C9J4M6	DNA-directed RNA polymerase;DNA-directed RNA polymerase II subunit RPB2	POLR2B	859					20	20	20	22.9	22.9	22.9	133.06	119.35	3028600000	60	104	25.652	25.4714	25.5999	25.7543	25.7128	25.6986	25.538	25.6088
+	2.16214	-1.10596	Q9BQ75;C9J384;H7C515	Q9BQ75;C9J384;H7C515	Protein CMSS1	CMSS1	860					3	3	3	14	14	14	31.884	5.0546	143630000	11	8	23.1994	23.0553	22.7499	23.2975	24.5415	24.1147	24.5621	23.5077
	0.792418	-0.541781	C9J3R8;O60513;E7ETS9;C9J4S5;C9J5S0;C9JE00;C9JA31	C9J3R8;O60513;E7ETS9	Beta-1,4-galactosyltransferase 4;N-acetyllactosamine synthase;Lactotriaosylceramide beta-1,4-galactosyltransferase	B4GALT4	861					7	7	7	28.6	28.6	28.6	35.047	9.3755	909540000	16	28	25.1494	24.927	23.6766	24.9509	25.1563	25.3071	25.1463	25.2614
	0.246881	0.478963	C9J406;H7C463	C9J406;H7C463		IMMT	862					30	3	1	50.5	5.6	2	73.253	22.527	496350000	41	17	25.1129	24.7268	25.1518	24.9845	22.1799	25.5341	25.2612	25.0851
	0.547594	-0.164908	C9J4Z3;P61513;M0R0A1;Q6P4E4;E9PEL3;G5E9R3;A6NKH3	C9J4Z3;P61513;M0R0A1;Q6P4E4;E9PEL3	60S ribosomal protein L37a	RPL37A	864					3	3	1	55.9	55.9	26.5	7.624	28.54	2285000000	4	43	26.1858	26.2656	26.0072	26.6284	26.3705	26.577	26.4428	26.3563
	0.598986	-0.364893	C9J5X1;P08069;H0YMJ5;H0YNR0	C9J5X1;P08069	Tyrosine-protein kinase receptor;Insulin-like growth factor 1 receptor;Insulin-like growth factor 1 receptor alpha chain;Insulin-like growth factor 1 receptor beta chain	IGF1R	865					7	7	7	6.1	6.1	6.1	154.79	13.063	448150000	67	23	23.1817	24.1451	24.4508	24.2604	24.3392	24.2711	24.5174	24.3699
	0.43911	0.346018	C9J715;Q9Y2I1	C9J715;Q9Y2I1	Nischarin	NISCH	867					2	2	2	7.2	7.2	7.2	64.079	5.1579	73887000	25	5	23.4039	22.8562	24.0335	23.0021	23.3382	23.0371	22.3017	23.2344
+	1.87998	0.885809	Q969T7;C9J758;E5RH64	Q969T7;C9J758	7-methylguanosine phosphate-specific 5-nucleotidase	NT5C3B	868					3	3	3	15.3	15.3	15.3	34.389	2.7859	138210000	18	6	23.4039	24.1432	23.4774	24.2565	23.0496	23.1522	22.9644	22.5716
	0.939804	0.228693	C9J8Q5;P51649;A0A5F9ZI23;A0A5F9ZH98	C9J8Q5;P51649	Succinate-semialdehyde dehydrogenase, mitochondrial	ALDH5A1	871					5	5	5	11	11	11	53.867	7.0719	563210000	24	15	25.1966	25.0882	24.9494	25.4338	24.9825	24.8709	24.7882	25.1118
	0.564766	0.137914	Q14061;C9J8T6;H7C4E5	Q14061;C9J8T6;H7C4E5	Cytochrome c oxidase copper chaperone	COX17	872					3	3	3	66.7	66.7	66.7	6.9151	37.668	3379800000	4	36	27.6725	27.5472	27.7972	27.3711	27.3716	27.3122	27.5618	27.5906
	0.879335	-0.179616	Q15382;C9J931;C9J469	Q15382;C9J931	GTP-binding protein Rheb	RHEB	873					4	4	4	23.9	23.9	23.9	20.497	6.5523	875480000	9	19	25.4576	25.4769	25.592	25.7963	25.7415	25.9339	25.604	25.762
	0.487366	-0.0922937	C9JA08;Q96D46	C9JA08;Q96D46	60S ribosomal export protein NMD3	NMD3	876					5	5	5	16.6	16.6	16.6	60.125	36.459	752010000	27	30	24.9597	24.9967	25.2508	25.087	25.2676	25.202	25.1906	25.0031
	0.130672	0.330262	C9JAX1;Q16595;A0A2R8Y5A1;A0A2R8Y4G3;A0A2R8Y577	C9JAX1;Q16595;A0A2R8Y5A1	Frataxin, mitochondrial;Frataxin intermediate form;Frataxin(56-210);Frataxin(78-210);Frataxin mature form	FXN	879					3	3	3	37	37	37	14.91	19.768	428380000	7	17	24.8179	25.129	25.1434	22.5971	25.1387	24.5758	21.9411	24.7108
+	2.62696	0.600077	C9JBI3;P78330	C9JBI3;P78330	Phosphoserine phosphatase	PSPH	881					7	7	7	48.1	48.1	48.1	20.745	25.407	1852600000	12	38	26.3786	26.4146	26.8757	26.4342	25.8877	25.8906	25.9619	25.9625
	0.261062	0.552044	C9JBY7;Q9Y291	C9JBY7;Q9Y291	28S ribosomal protein S33, mitochondrial	MRPS33	883					2	2	2	24	24	24	11.456	4.0645	693140000	4	16	25.6616	25.4354	25.2725	25.281	25.8874	25.74	25.5344	22.2804
	0.52653	0.287037	C9JDZ2;Q9NVQ4	C9JDZ2;Q9NVQ4	Fas apoptotic inhibitory molecule 1	FAIM	885					1	1	1	8.6	8.6	8.6	14.661	2.748	200820000	7	10	24.0652	23.4154	23.2937	24.2763	23.6	23.3516	23.6042	23.3465
	0.915926	-0.92317	C9JG97;C9JEH3;Q13685;H7C0R2;C9JTS3	C9JG97;C9JEH3;Q13685;H7C0R2;C9JTS3	Angio-associated migratory cell protein	AAMP	887					4	4	4	12.5	12.5	12.5	44.693	25.569	491360000	15	19	22.8016	24.6729	23.7287	25.0416	25.2724	24.9081	24.8931	24.8639
	1.14097	0.430987	C9JEJ2;P49585;H7C1T3;C9J050;H7BZN1;C9J2E1;Q9Y5K3;C9JPY0;C9JVS0;F8WAZ5;F2Z2B1	C9JEJ2;P49585;H7C1T3;C9J050;H7BZN1;C9J2E1;Q9Y5K3	Choline-phosphate cytidylyltransferase A;Choline-phosphate cytidylyltransferase B	PCYT1A;PCYT1B	888					6	6	6	27.6	27.6	27.6	43.263	24.324	908180000	24	41	25.2326	25.235	25.1473	25.0551	24.4696	24.4383	24.7658	25.2724
	1.81861	-0.300919	C9JFE4;Q13098;A0A096LP07;A0A096LPJ3;A8K070;J3KSA5;J3QLT0;J3KRJ4;J3QQX0;J3QS84;J3QS88;J3KTB0;J3QLE8;J3QL53;J3KRE8	C9JFE4;Q13098;A0A096LP07;A0A096LPJ3;A8K070	COP9 signalosome complex subunit 1	GPS1	890					11	11	11	30.1	30.1	30.1	53.371	112.05	3155200000	18	91	26.0883	26.1629	26.0957	25.9118	26.2429	26.4942	26.2403	26.4851
	0.242274	-0.0663323	C9JFR7;P99999;CON__P62894	C9JFR7;P99999	Cytochrome c	CYCS	891					5	5	5	56.4	56.4	56.4	11.333	68.884	9451700000	6	58	28.651	28.7267	28.3549	28.5883	28.4386	28.7317	28.7883	28.6277
	1.15952	-0.167196	C9JFV4;Q8IZL8;E7EV54;I3L445;I3L1P4;I3L4M7;I3L4P1	C9JFV4;Q8IZL8;E7EV54	Proline-, glutamic acid- and leucine-rich protein 1	PELP1	892					15	15	15	16.7	16.7	16.7	124.94	68.947	1742600000	43	85	24.9448	25.0511	25.2149	25.0874	25.1261	25.2069	25.3699	25.2641
	0.0695801	-0.00849104	C9JIF9;P13798;H7C393;H7C1U0;C9JLK2;F8WEH5	C9JIF9;P13798;H7C393	Acylamino-acid-releasing enzyme	APEH	893					13	13	13	25.9	25.9	25.9	81.673	76.363	5117600000	31	97	27.0409	27.2337	27.1484	27.1537	27.1425	27.1112	27.1991	27.158
	1.11473	2.6863	Q9Y4P1;C9JIK8;C9J1C1	Q9Y4P1;C9JIK8	Cysteine protease ATG4B	ATG4B	894					3	3	3	11.7	11.7	11.7	44.294	2.1082	990950000	18	3	27.319	27.5552	23.7757	27.8501	23.4532	22.6453	26.3378	23.3186
+	4.08097	0.409927	C9JIZ6;P07602;Q5BJH1;A0A0J9YXB8	C9JIZ6;P07602;Q5BJH1	Prosaposin;Saposin-A;Saposin-B-Val;Saposin-B;Saposin-C;Saposin-D	PSAP	896					14	14	14	27.7	27.7	27.7	58.44	66.751	11754000000	31	124	28.2528	28.2303	28.249	28.3483	27.9398	27.8676	27.7705	27.8628
	0.0682743	-0.0122123	C9JJ19;P82930	C9JJ19;P82930	28S ribosomal protein S34, mitochondrial	MRPS34	897					9	9	9	50.7	50.7	50.7	26.332	36.128	2969400000	13	86	26.4128	26.4879	26.3947	26.5397	26.3537	26.6084	26.4264	26.4956
	2.09342	0.254612	C9JKI3;E9PCT5;Q03135;P56539	C9JKI3;E9PCT5;Q03135;P56539	Caveolin;Caveolin-1;Caveolin-3	CAV1;CAV3	898					4	4	4	36.2	36.2	36.2	15.928	28.271	5260900000	8	32	28.4592	28.3959	28.3946	28.3651	28.0892	28.0654	28.3344	28.1073
	0.184137	-0.0538149	C9JLU1;P52434	C9JLU1;P52434	DNA-directed RNA polymerases I, II, and III subunit RPABC3	POLR2H	899					3	3	3	25.7	25.7	25.7	16.925	20.785	1262600000	9	25	25.8112	25.775	26.0097	25.4891	25.928	25.8147	25.8219	25.7356
	1.74013	0.342011	C9JNE2;Q9Y530;C9JXC3;C9JA90;C9J5P1;C9IZY1	C9JNE2;Q9Y530;C9JXC3	O-acetyl-ADP-ribose deacetylase 1	OARD1	902					4	4	4	24.4	24.4	24.4	14.67	28.24	995420000	10	35	25.6449	25.6652	25.9187	25.5695	25.2006	25.2793	25.5386	25.4119
	1.39527	-0.267741	C9JNK6;O75431;C9JAZ1	C9JNK6;O75431;C9JAZ1	Metaxin-2	MTX2	903					4	4	4	26.1	26.1	26.1	23.643	103.51	1300200000	9	45	25.9742	26.134	26.1702	25.8972	26.423	26.0805	26.4108	26.3322
+	3.78422	-0.631595	C9JXB8;C9JNW5;P83731	C9JXB8;C9JNW5;P83731	60S ribosomal protein L24	RPL24	904					5	5	5	39.7	39.7	39.7	14.369	22.003	12828000000	7	59	27.99	27.9228	28.073	27.8231	28.6033	28.4612	28.722	28.5489
	0.650722	-1.60176	C9JQ41;H7C525;Q4VC31;C9JBU9	C9JQ41;H7C525;Q4VC31	Coiled-coil domain-containing protein 58	CCDC58	905					4	4	4	43.1	43.1	43.1	15.296	8.2516	564990000	7	11	26.3643	23.0276	22.4646	22.8888	23.0204	25.7753	26.1023	26.2545
	0.114211	0.0333533	C9JQD4;O43447;H0YEL5;A0A7I2YQS4;A0A7I2V5V0;A0A7I2V2H6;A0A7I2V343	C9JQD4;O43447;H0YEL5;A0A7I2YQS4	Peptidyl-prolyl cis-trans isomerase;Peptidyl-prolyl cis-trans isomerase H	PPIH	906					7	7	7	33.1	33.1	33.1	16.549	9.9437	1097300000	10	31	25.3314	25.6758	25.4531	25.7081	25.5197	25.4089	25.4323	25.6741
	0.471685	-0.179595	C9JQV0;Q9BRJ6;H7C0T1;H7C2R9	C9JQV0;Q9BRJ6;H7C0T1;H7C2R9	Uncharacterized protein C7orf50	C7orf50	908					5	5	5	45.8	45.8	45.8	21.883	47.745	1881400000	8	50	26.0259	26.4246	26.5608	26.2321	26.8469	26.2646	26.3657	26.4847
	0.137773	0.0336623	C9JRZ6;Q9NX63;F8WAR4;A0A286YEX5	C9JRZ6;Q9NX63;F8WAR4	MICOS complex subunit MIC19	CHCHD3	909					5	5	5	27.2	27.2	27.2	26.753	72.006	4237400000	14	50	27.0142	26.9942	26.964	27.3493	26.9926	27.0447	27.0877	27.0621
	1.14989	0.505205	C9JUJ0;Q9UFW8	C9JUJ0;Q9UFW8	CGG triplet repeat-binding protein 1	CGGBP1	912					3	3	3	30.2	30.2	30.2	11.939	4.5614	491660000	7	12	25.1929	24.9477	25.3671	24.8507	25.0154	24.7075	24.0647	24.55
	0.371889	-0.124608	C9JVE2;Q96GG9;C9JRU6;C9J0B2;C9J8R4	C9JVE2;Q96GG9;C9JRU6;C9J0B2;C9J8R4	DCN1-like protein;DCN1-like protein 1	DCUN1D1	913					5	5	5	22.5	22.5	22.5	28.305	19.495	1196700000	13	28	26.0105	25.5345	25.4734	25.6862	26.0232	25.8103	25.7323	25.6372
	0.0687059	-0.0330129	C9JVN9;Q9H9P8;G3V272;G3V5S1	C9JVN9;Q9H9P8	L-2-hydroxyglutarate dehydrogenase, mitochondrial	L2HGDH	914					5	5	5	15	15	15	48.475	9.3497	523150000	27	19	24.869	24.6784	24.9098	25.2265	25.3248	24.9242	24.7602	24.8064
	3.97708	-0.243285	P35998;C9JX88;C9JLS9	P35998;C9JX88	26S protease regulatory subunit 7	PSMC2	915					24	24	24	63.5	63.5	63.5	48.633	222.45	15131000000	28	238	27.2553	27.3188	27.2311	27.2668	27.5643	27.5133	27.4967	27.4708
	0.227429	0.051949	C9JYN0	C9JYN0		SYPL1	917					5	5	1	27.7	27.7	4.9	24.784	19.669	1703100000	10	26	26.4293	26.3469	26.6321	26.6377	26.4332	26.6234	26.3882	26.3934
	0.347812	0.186827	C9JYQ9;H0Y8C2;Q6P5R6	C9JYQ9;H0Y8C2;Q6P5R6	60S ribosomal protein L22-like 1	RPL22L1	918					3	2	2	36.4	29.8	29.8	14.478	94.624	3595300000	4	34	27.5124	27.7043	27.5374	27.6005	26.9478	27.0984	27.6549	27.9062
	0.123091	0.011035	C9JYY6;Q92823;F8W775;A0A087X2B3;C9JH43;C9JF43;H7C132	C9JYY6;Q92823;F8W775;A0A087X2B3	Neuronal cell adhesion molecule	NRCAM	919					23	23	23	26.5	26.5	26.5	133.81	223.52	9365500000	57	206	26.7256	26.7046	26.71	26.7486	26.7869	26.6866	26.6373	26.7339
	0.656356	-0.880947	C9JZY6	C9JZY6		UBE2H	920					2	2	1	44.7	44.7	32.5	13.818	10.442	490250000	5	17	25.4114	22.9169	23.2562	25.0551	24.9078	25.2214	25.3353	24.6989
	2.46402	-0.197468	D3DQV9;P78344;H0Y3P2;H0YCH5;H0YD77;E9PKF8;H0YEC5;H0YE22;H0YE44;H0YCF8;H0YEN8;H0YDC0	D3DQV9;P78344;H0Y3P2	Eukaryotic translation initiation factor 4 gamma 2	EIF4G2	1037					31	31	31	40.5	40.5	40.5	102.33	190.27	11979000000	50	197	27.5836	27.5779	27.4993	27.4699	27.772	27.7696	27.7402	27.6387
	1.2657	-0.994216	F6U1T9;D3YTA9;P63098;H7BYZ3	F6U1T9;D3YTA9;P63098	Calcineurin subunit B type 1	PPP3R1	1039					3	3	3	29.4	29.4	29.4	18.208	21.08	172990000	9	11	23.0981	22.8162	23.0759	23.2745	22.9859	24.9478	24.067	24.2408
	0.0966311	-0.026948	D3YTB1;F8W727;P62910;D3YTI8	D3YTB1;F8W727;P62910	60S ribosomal protein L32	RPL32	1040					9	9	9	51.9	51.9	51.9	15.616	73.806	15427000000	7	129	28.2301	28.1847	28.1168	28.3804	28.5002	28.2255	28.1866	28.1075
	0.297542	0.379992	H7C1F0;F8WAB6;D3YTB5;P51617	H7C1F0;F8WAB6;D3YTB5;P51617	Interleukin-1 receptor-associated kinase 1	IRAK1	1041					1	1	1	6.4	6.4	6.4	25.298	4.3261	205300000	9	12	23.3794	23.7252	23.6703	24.1381	23.0667	23.2134	24.7719	22.341
	0.873835	0.122232	D6R938;Q13557;H0Y9C2;H0Y9J2;E9PBE8;H7BZC6;E7ERS6	D6R938;Q13557	Calcium/calmodulin-dependent protein kinase type II subunit delta	CAMK2D	1042					17	17	1	44.8	44.8	6	56.298	63.459	4817300000	26	99	27.1809	27.3529	27.1075	27.1861	26.9889	27.1425	27.0195	27.1876
	1.98186	-0.269022	D6R9P3;D6RD18;D6RBZ0;Q99729	D6R9P3;D6RD18;D6RBZ0;Q99729	Heterogeneous nuclear ribonucleoprotein A/B	HNRNPAB	1044					8	8	8	29.6	29.6	29.6	30.302	88.322	20159000000	13	97	28.7229	28.9122	28.701	28.6347	29.1057	28.9441	28.9348	29.0622
+	2.47474	-0.49184	D6RA57;H0Y9X1;Q96EY4;D6RE67;D6RC31	D6RA57;H0Y9X1;Q96EY4	Translation machinery-associated protein 16	TMA16	1046					3	3	3	29.9	29.9	29.9	17.155	29.629	858430000	6	24	25.1392	25.0855	25.4053	25.3879	25.5697	25.8698	25.801	25.7448
	0.850313	-0.197564	Q4VXL4;D6RAA5;Q4VXL8;E7EMZ9;E9PBC6;O95359;A0A0U1RRM9;H0Y9C3;H0Y911;H0Y9Y7;E9PGB3	Q4VXL4;D6RAA5;Q4VXL8;E7EMZ9;E9PBC6;O95359;A0A0U1RRM9	Transforming acidic coiled-coil-containing protein 2	TACC2	1047					11	10	10	22.8	21.4	21.4	64.675	115.07	2444200000	32	77	25.7448	25.9506	25.4109	25.6802	25.911	25.9391	25.9348	25.7918
	0.754526	-0.209711	P57088;D6RAA6;H0Y8N0	P57088;D6RAA6;H0Y8N0	Transmembrane protein 33	TMEM33	1048					3	3	3	12.6	12.6	12.6	27.978	30.479	976810000	11	22	25.3491	25.5001	25.3464	25.7761	25.8835	25.8001	25.461	25.666
+	3.28574	0.391658	D6RAN8;Q9P0M9;H7C5U8;D6RE11;B3KN43	D6RAN8;Q9P0M9;H7C5U8	39S ribosomal protein L27, mitochondrial	MRPL27	1050					5	5	5	64.5	64.5	64.5	10.474	10.926	1355000000	6	30	26.3334	26.3017	26.4765	26.4481	25.933	25.9822	25.9655	26.1124
	2.18164	-0.300533	D6RAY7;P46926;D6R9P4;D6RFF8;D6RB13;D6R917	D6RAY7;P46926;D6R9P4;D6RFF8;D6RB13	Glucosamine-6-phosphate isomerase;Glucosamine-6-phosphate isomerase 1	GNPDA1	1052					7	7	6	50.6	50.6	43.5	26.987	117.83	3551300000	14	57	26.5398	26.6429	26.5704	26.7071	26.9803	26.8291	26.7912	27.0618
	0.0137215	-0.0387001	D6RB01;Q9Y6X4;D6RC41;D6R953	D6RB01;Q9Y6X4;D6RC41;D6R953	Soluble lamin-associated protein of 75 kDa	FAM169A	1053					2	2	2	3.6	3.6	3.6	68.054	3.166	536310000	25	8	26.0726	25.5697	22.9006	23.9326	25.297	22.8348	25.3115	25.187
+	2.35987	-1.23447	D6RB92;Q5JS54;D6REN3;E2QRC7;H7C465	D6RB92;Q5JS54;D6REN3;E2QRC7;H7C465	Proteasome assembly chaperone 4	PSMG4	1055					2	2	2	38	38	38	11.655	9.876	170550000	7	4	23.2672	22.3695	22.7661	22.7602	23.7258	23.619	24.2855	24.4706
	0.0994141	0.112492	D6RBN9;Q8IUW5	D6RBN9;Q8IUW5	RELT-like protein 1	RELL1	1056					1	1	1	6.5	6.5	6.5	27.245	3.7182	63988000	9	4	23.3111	23.0664	22.6544	22.3802	21.942	23.6876	22.6349	22.6975
	0.202824	0.331183	D6RBS5;Q8IZ81;V9GY58;D6RHX2	D6RBS5;Q8IZ81;V9GY58;D6RHX2	ELMO domain-containing protein 2	ELMOD2	1057					2	2	2	15.6	15.6	15.6	20.147	3.4354	171170000	10	4	24.5824	23.1979	23.1429	23.0795	23.997	21.9827	22.545	24.1534
	1.50047	-0.18694	D6RBW1;P06730;H0Y8J7;D6RFJ3;D6RHE2;H0Y8X3;A6NMX2	D6RBW1;P06730;H0Y8J7	Eukaryotic translation initiation factor 4E	EIF4E	1058					7	7	7	29.4	29.4	29.4	28.512	28.135	5092400000	12	73	26.9535	27.0568	26.9068	26.8152	27.1196	27.055	27.06	27.2454
	1.12864	-0.188823	D6RC52;D6RCB9;Q9NX24;H0YC83;J3QSY4	D6RC52;D6RCB9;Q9NX24;H0YC83;J3QSY4	H/ACA ribonucleoprotein complex subunit 2	NHP2	1059					4	4	4	53.8	53.8	53.8	15.017	40.095	795970000	5	27	25.1861	25.0258	25.2036	25.3853	25.3294	25.5212	25.394	25.3115
	1.01132	-0.284094	D6RCD0;Q8NBQ5	D6RCD0;Q8NBQ5	Estradiol 17-beta-dehydrogenase 11	HSD17B11	1061					5	5	5	27	27	27	28.102	62.109	1418000000	16	39	25.8905	25.685	25.5085	25.5633	26.1474	25.6072	25.9943	26.0348
	1.12855	-0.0739827	D6RCD7;P38646;A0A7I2V2G2;A0A7I2V2S7;A0A7I2V3F7;A0A7I2YQB2;H0Y8K0;A0A3B3ITI4;H0Y8S0	D6RCD7;P38646;A0A7I2V2G2;A0A7I2V2S7;A0A7I2V3F7;A0A7I2YQB2;H0Y8K0	Stress-70 protein, mitochondrial	HSPA9	1062					29	29	29	51.9	51.9	51.9	72.25	323.31	104700000000	37	471	30.0683	30.0482	30.1202	30.1407	30.1676	30.2438	30.1292	30.1327
	0.313071	-0.0915718	D6RD46;Q9UPQ0;E7EPK0;E9PDJ9;H0Y8P3;G5EA03	D6RD46;Q9UPQ0;E7EPK0;E9PDJ9;H0Y8P3;G5EA03	LIM and calponin homology domains-containing protein 1	LIMCH1	1063					10	10	10	14.7	14.7	14.7	109.93	29.494	1257900000	55	51	24.9228	25.3148	24.8334	25.0768	25.0741	24.9772	25.2681	25.1947
	0.687179	-1.25983	D6REK3;Q6UX04	D6REK3;Q6UX04	Peptidyl-prolyl cis-trans isomerase CWC27 homolog	CWC27	1065					2	2	2	8.4	8.4	8.4	42.996	6.2231	532780000	18	16	22.4945	21.8322	24.9433	25.3708	25.0781	25.1707	24.6644	24.7668
	0.010182	-0.00265646	D6RGI3;D6RER5;Q9NVA2;D6RDU5;D6RDP1;D6R9Y6;H0Y961;H0Y9G8	D6RGI3;D6RER5;Q9NVA2;D6RDU5	Septin-11	2011-09-01	1066					16	16	10	48	48	32.5	49.005	174.26	5758400000	21	115	26.9297	26.8332	26.8596	26.6772	26.7296	26.8141	27.0288	26.7378
	1.61246	0.0710783	D6REX3;O94979;H7BXG7;D6RHZ5;H0YAB3;H0Y8V7;H0Y8W8;H0Y9T9;H0Y9K1;H0YAF5;H0Y9V3;D6RBT0;D6RHE8;D6RE64;D6RCQ9	D6REX3;O94979;H7BXG7;D6RHZ5	Protein transport protein Sec31A	SEC31A	1067					25	25	25	28.5	28.5	28.5	136.22	143.25	7609600000	49	171	27.4942	27.3871	27.4167	27.4335	27.3712	27.3756	27.3583	27.3421
	0.858244	-0.254634	Q9P2W9;D6RF48;D6RC71	Q9P2W9;D6RF48	Syntaxin-18	STX18	1068					3	3	3	13.7	13.7	13.7	38.673	12.842	368150000	20	19	24.4831	23.798	24.0135	23.9694	24.3667	24.2503	24.3608	24.3047
	0.405312	-0.588131	P27707;D6RFG8;D6RCP9	P27707;D6RFG8	Deoxycytidine kinase	DCK	1069					3	3	3	9.2	9.2	9.2	30.518	6.5221	395040000	13	14	24.9131	24.4968	22.9576	22.2601	24.5342	24.3434	24.1428	23.9597
	1.99609	-0.22688	D6RG13;P61247;D6RAT0;H0Y8L7;D6RB09;E9PFI5;D6RAS7;D6RED7;H0Y9Y4;D6R9B6;D6RGE0;D6RI02	D6RG13;P61247;D6RAT0;H0Y8L7;D6RB09;E9PFI5;D6RAS7;D6RED7;H0Y9Y4	40S ribosomal protein S3a	RPS3A	1070					11	11	11	49.8	49.8	49.8	25.608	205.89	59738000000	15	277	29.5695	29.426	29.5606	29.4286	29.6097	29.8381	29.7181	29.7262
	0.431856	0.125637	H0YA18;D6RGX2;Q9NUQ7	H0YA18;D6RGX2;Q9NUQ7	Ufm1-specific protease 2	UFSP2	1072					2	2	2	9	9	9	41.804	19.443	410810000	19	19	24.7461	24.867	24.7736	25.1571	24.5181	24.7603	24.8195	24.9433
	0.042434	0.0908947	D6RJ90;Q9Y6G5;H0Y9N4;D6RC04	D6RJ90;Q9Y6G5;H0Y9N4;D6RC04	COMM domain-containing protein 10	COMMD10	1074					3	3	3	17	17	17	21.529	7.234	257980000	11	6	22.7477	24.5878	25.2699	23.0442	24.5127	22.6394	24.4279	23.7061
+	2.93608	0.555298	D6RJC3;E7EQN9;O15327;E9PG59;E9PCZ3;E9PHC0;D6RE59;D6R9J5;D6RDJ7;Q9BS68;H0YA10	D6RJC3;E7EQN9;O15327;E9PG59;E9PCZ3;E9PHC0	Type II inositol 3,4-bisphosphate 4-phosphatase	INPP4B	1076					9	9	9	20.9	20.9	20.9	92.125	16.515	855200000	44	28	24.7706	24.6275	24.4987	24.7469	24.0372	23.9334	24.2334	24.2185
	1.35384	0.120245	E5KLJ9;A0A2R8Y3X5;O60313;A0A2R8YDM2;C9JMB8;A0A2R8YFD1;A0A2R8YE78;A0A2R8YGE5;A0A2R8YD53;A0A2R8Y4Q3;H7C141;A0A2R8YE54;A0A2R8Y4G4;H7C3G2	E5KLJ9;A0A2R8Y3X5;O60313;A0A2R8YDM2;C9JMB8;A0A2R8YFD1;A0A2R8YE78	Dynamin-like 120 kDa protein, mitochondrial;Dynamin-like 120 kDa protein, form S1	OPA1	1077					18	18	18	22.5	22.5	22.5	113.68	50.599	4138800000	53	90	26.9644	27.0271	27.1017	27.0519	26.976	26.9083	26.968	26.8119
	0.39362	0.864137	E5RFF9;Q9BRT9	E5RFF9;Q9BRT9	DNA replication complex GINS protein SLD5;DNA replication complex GINS protein SLD5;DNA replication complex GINS protein SLD5, N-terminally processed	GINS4	1078					2	2	2	17.2	17.2	17.2	22.653	6.2447	426220000	12	16	25.758	24.078	25.2893	22.5558	23.5459	22.3982	22.9234	25.3571
	1.0025	0.498001	E5RFH6;E5RFU2;P34913;E5RI53;H0YAW7	E5RFH6;E5RFU2;P34913;E5RI53;H0YAW7	Bifunctional epoxide hydrolase 2;Cytosolic epoxide hydrolase 2;Lipid-phosphate phosphatase	EPHX2	1079					2	2	2	7.8	7.8	7.8	42.102	1.8084	143770000	23	5	23.47	23.3037	23.6103	23.9795	22.5385	23.0714	23.2039	23.5578
	0.782249	-0.232485	E5RFP0;Q8WVJ2	E5RFP0;Q8WVJ2	NudC domain-containing protein 2	NUDCD2	1080					4	4	4	36.4	36.4	36.4	14.745	20.502	1672900000	6	20	26.2063	25.9474	26.3637	26.111	26.269	26.1707	26.7149	26.4039
	0.461622	0.213435	G5EA19;U3KQS5;E5RG17;Q6P1N9;H0YBX2;E5RID7;E5RGF2;A0A0D9SGD3;E5RH86;E5RI69;E5RJY6;E5RG62;E5RK70	G5EA19;U3KQS5;E5RG17;Q6P1N9;H0YBX2	Putative deoxyribonuclease TATDN1	TATDN1	1082					5	5	5	28.5	28.5	28.5	23.598	7.5918	1047200000	13	23	26.2276	26.0055	25.9432	25.7335	25.7417	25.2726	25.9121	26.1295
	0.921744	-0.751486	E5RG91;Q8NEZ2;E5RJ10;E5RHB8;E5RJX6	E5RG91;Q8NEZ2;E5RJ10;E5RHB8;E5RJX6	Vacuolar protein sorting-associated protein 37A	VPS37A	1083					2	2	2	9.8	9.8	9.8	35.047	19.25	345890000	14	13	24.5356	24.2828	23.864	22.7979	24.9798	24.7933	24.3585	24.3547
	0.764311	0.106938	E5RGN3;E5RIM7;O00244	E5RGN3;E5RIM7;O00244	Copper transport protein ATOX1	ATOX1	1084					2	2	2	42.4	42.4	42.4	6.3304	91.062	2727300000	4	43	27.0783	26.9379	27.2149	26.9646	26.9158	27.0114	26.9577	26.883
	0.264072	0.34959	E5RGS5;E5RGQ3;Q9H446;E5RJE3	E5RGS5;E5RGQ3;Q9H446;E5RJE3	RWD domain-containing protein 1	RWDD1	1085					2	2	2	38.8	38.8	38.8	7.935	9.1245	328470000	4	12	24.2823	24.0831	25.0686	24.2508	24.5538	24.4164	24.7257	22.5905
	0.12389	0.326584	E5RGS2;Q9H6H4	E5RGS2;Q9H6H4	Receptor expression-enhancing protein;Receptor expression-enhancing protein 4	REEP4	1086					1	1	1	9.2	9.2	9.2	28.214	11.983	496680000	14	13	25.2203	23.2525	25.2138	23.7195	23.7047	25.6341	24.9687	21.7922
	2.05764	-0.399312	E5RGS4;O60925	E5RGS4;O60925	Prefoldin subunit 1	PFDN1	1087					5	5	5	51.3	51.3	51.3	13.466	36.984	3019900000	8	37	27.0067	26.648	26.8934	26.7605	27.2522	27.405	27.1719	27.0767
	1.47825	-0.44548	Q15369;E5RHG8;R4GMY8	Q15369;E5RHG8;R4GMY8	Transcription elongation factor B polypeptide 1	TCEB1	1089					6	6	6	66.1	66.1	66.1	12.473	56.188	7700800000	7	57	28.3448	27.9299	28.192	27.804	28.8236	28.4668	28.3651	28.3971
	1.87033	-0.302844	O94905;E5RHW4;E5RJ09	O94905;E5RHW4	Erlin-2	ERLIN2	1091					11	11	8	42.5	42.5	33.3	37.839	56.214	2469900000	21	76	25.7586	25.4629	25.6564	25.8275	26.0774	25.9045	25.9883	25.9465
	0.49986	-0.228791	E5RI99;P62888;A0A0B4J213;E5RJH3;A0A0C4DH44	E5RI99;P62888	60S ribosomal protein L30	RPL30	1093					5	5	5	58.8	58.8	58.8	12.656	145.6	6052400000	6	50	27.6796	27.6586	27.5799	28.2413	28.302	28.1874	27.6555	27.9297
	0.427813	-0.205195	E5RIA4;E7ETB3;Q9ULA0;C9JBE1;E7EMB6;B9ZVU2;F8WAN0;E7EPX3;E5RJ35;C9JRG3;C9J1E2	E5RIA4;E7ETB3;Q9ULA0;C9JBE1;E7EMB6;B9ZVU2;F8WAN0;E7EPX3	Aspartyl aminopeptidase	DNPEP	1094					8	8	8	26.3	26.3	26.3	51.998	25.89	1430900000	20	54	25.4399	26.0435	25.2039	25.9475	25.8407	25.6727	25.9818	25.9605
	1.4209	-1.60594	E5RIP4;Q15043;E5RFZ8;E5RGA7;E5RJ40;E5RJG5	E5RIP4;Q15043;E5RFZ8;E5RGA7;E5RJ40;E5RJG5	Zinc transporter ZIP14	SLC39A14	1095					3	3	3	29	29	29	17	16.65	730380000	9	16	23.2583	23.2874	25.1794	25.466	25.822	25.9951	25.6318	26.1661
	1.53838	-0.18687	E5RIW3;E5RJD8;O75347;E5RHG6;E5RIX8;A0A494C144	E5RIW3;E5RJD8;O75347;E5RHG6;E5RIX8	Tubulin-specific chaperone A	TBCA	1096					9	9	9	67.9	67.9	67.9	10.08	53.43	14613000000	6	90	28.6308	28.7818	28.6252	28.515	28.9037	28.8367	28.8297	28.7302
	0.422003	-0.107985	E5RJR5;P63208;E7ERH2;F8W8N3;E5RGM3	E5RJR5;P63208;E7ERH2;F8W8N3;E5RGM3	S-phase kinase-associated protein 1	SKP1	1098					10	10	10	44.2	44.2	44.2	18.72	73.939	8384100000	10	105	28.0534	27.6106	27.9109	27.7161	27.7659	28.0127	27.9796	27.9647
	1.3813	-1.92425	E5RK48;Q8IZV5	E5RK48;Q8IZV5	Retinol dehydrogenase 10	RDH10	1099					2	2	2	15.9	15.9	15.9	19.793	10.881	680860000	9	20	25.9154	22.3499	23.8135	23.6245	25.7198	25.8874	25.6869	26.1064
	0.528714	0.176397	Q7L5N1;E7EM64;H7C3T0	Q7L5N1;E7EM64	COP9 signalosome complex subunit 6	COPS6	1100					9	9	9	44	44	44	36.163	64.583	3153200000	12	75	26.6421	26.3099	25.9606	26.2298	26.2322	25.9309	26.1464	26.1274
	1.24309	-0.388239	E7EMB1;Q9UH65;E9PJM7;E9PJK8	E7EMB1;Q9UH65	Switch-associated protein 70	SWAP70	1101					13	13	13	35.1	35.1	35.1	62.032	60.445	1702000000	33	52	25.0852	25.1618	24.7613	24.9281	25.0857	25.1937	25.6791	25.5307
	0.207152	0.0372162	P0DP25;P0DP24;P0DP23;E7EMB3;Q96HY3;G3V361;A0A590UJI2;M0QZ52;A0A590UJC0;F8WBR5;G3V226;G3V479;P27482;C9J7T9;P02585	P0DP25;P0DP24;P0DP23;E7EMB3;Q96HY3;G3V361;A0A590UJI2		CALM2;CALM1	1102					9	9	9	56.4	56.4	56.4	16.837	279.68	67095000000	9	176	30.7541	30.6843	30.8596	30.582	30.6532	30.6273	30.646	30.8046
	0.0626866	-0.0485711	E7EMN6;Q6NXS1;P41236;E7EUI7	E7EMN6;Q6NXS1;P41236;E7EUI7	Protein phosphatase inhibitor 2-like protein 3;Protein phosphatase inhibitor 2	PPP1R2;PPP1R2P3	1103					2	2	2	12.4	12.4	12.4	19.245	14.31	1234200000	8	24	25.2887	25.9584	26.458	26.3081	25.9048	26.0456	26.3039	25.9532
	0.59487	0.229467	J3KMY5;G3V3E8;E7EMS2;G3V3D1;P61916;G3V2V8;H0YIZ1	J3KMY5;G3V3E8;E7EMS2;G3V3D1;P61916;G3V2V8;H0YIZ1	Epididymal secretory protein E1	NPC2	1104					6	6	6	51.4	51.4	51.4	16.23	50.047	2538700000	10	65	26.4454	26.502	26.4504	26.4676	25.7571	26.1645	26.5749	26.451
	0.53937	-0.460916	E7EMW7;O95071;E5RFK7;E7ET84	E7EMW7;O95071;E5RFK7;E7ET84	E3 ubiquitin-protein ligase UBR5	UBR5	1105					4	4	4	2.2	2.2	2.2	308.57	9.4117	363290000	130	14	24.7558	24.509	23.1774	24.8624	24.9707	24.7162	24.8112	24.6501
+	1.42066	-3.23182	E7EN86;P52747	E7EN86;P52747	Zinc finger protein 143	ZNF143	1106					2	2	2	4.3	4.3	4.3	65.885	5.1273	1661900000	23	15	28.3132	23.8085	23.3496	23.2842	27.6091	27.9217	28.1352	28.0167
	2.26348	0.270531	E7EV99;E7ENY0;P35611;A0A804HL01;H0Y9H2;A0A0A0MSR2;H0YG19;D6RF25;D6RJE2;H0YFD8;D6RAH3	E7EV99;E7ENY0;P35611;A0A804HL01;H0Y9H2;A0A0A0MSR2	Alpha-adducin	ADD1	1107					12	12	11	29.3	29.3	28	70.055	41.568	2074300000	26	69	25.5504	25.4193	25.4282	25.3209	25.0357	25.2232	25.1637	25.214
+	3.5211	-0.462253	E7EPB3;P50914	E7EPB3;P50914	60S ribosomal protein L14	RPL14	1109					5	5	5	41.9	41.9	41.9	14.558	49.682	12721000000	6	67	28.5809	28.4619	28.3899	28.6248	28.9036	29.0071	28.9524	29.0434
	2.0761	0.496959	E7EPI0;Q9P2D0;E9PDR5;D6R9F4	E7EPI0;Q9P2D0;E9PDR5	Inhibitor of Bruton tyrosine kinase	IBTK	1110					3	3	3	2.2	2.2	2.2	149.01	3.4763	444670000	68	11	25.0198	24.9614	25.1774	25.2327	24.9322	24.4472	24.5322	24.4919
	1.84592	-0.258543	E7ES33;E7EPK1;Q16181;G3V1Q4;A0A0U1RRE1;A0A0U1RRH9;A0A5F9ZGZ7;A0A0U1RRM2;A0A0U1RRD1;Q5JXL7;Q6ZU15	E7ES33;E7EPK1;Q16181;G3V1Q4	Septin-7	2007-09-01	1112					13	13	13	41.5	41.5	41.5	48.715	177.27	13434000000	21	145	28.2132	28.0327	28.118	28.0409	28.5276	28.3541	28.3348	28.2225
	0.289282	-0.0655508	E7EPN9;Q9Y520;H7C5N8;A0A2R8YET2;A0A2R8Y7F4;A0A0A0MS30;A0A2R8Y424	E7EPN9;Q9Y520	Protein PRRC2C	PRRC2C	1113					39	39	39	19.3	19.3	19.3	308.77	205.38	4251700000	100	187	25.6006	25.544	25.2334	25.4014	25.4916	25.6306	25.4029	25.5165
	0.543456	1.16952	E7EPP6;O14757;E9PJI4;E9PPA5;E9PKQ3	E7EPP6;O14757	Serine/threonine-protein kinase Chk1	CHEK1	1114					3	3	3	5.9	5.9	5.9	55.517	4.7899	532150000	24	7	25.9993	23.4997	23.8717	26.1439	23.9022	22.7787	22.492	25.6636
	0.656403	-0.218239	E7EPT4;P19404	E7EPT4;P19404	NADH dehydrogenase [ubiquinone] flavoprotein 2, mitochondrial	NDUFV2	1115					7	7	7	38.5	38.5	38.5	27.907	37.832	1654900000	14	63	25.4829	25.6779	25.3491	25.7554	26.1112	25.8765	25.5932	25.5572
	2.38697	-0.235816	E7EQ69;Q9GZZ1;C9J5D1;A0A087WWJ2;B0AZT5;C9JZU6;C9J5J3;A0A0D9SF32;F8WCK0	E7EQ69;Q9GZZ1;C9J5D1;A0A087WWJ2	N-alpha-acetyltransferase 50	NAA50	1116					11	11	11	63.7	63.7	63.7	19.311	70.528	5452600000	11	97	26.989	27.1652	27.1743	27.0232	27.3316	27.281	27.3802	27.3021
	0.0413006	-0.0394726	Q15363;E7EQ72;F5GX39	Q15363;E7EQ72;F5GX39	Transmembrane emp24 domain-containing protein 2	TMED2	1117					4	4	4	24.9	24.9	24.9	22.761	25.755	3709800000	9	45	27.7859	28.0536	27.8904	28.2576	27.0963	28.2904	28.461	28.2977
	0.135181	0.0186391	P15311;E7EQR4;E9PNP4	P15311;E7EQR4	Ezrin	EZR	1118					38	27	25	57	43	41.6	69.412	323.31	73814000000	32	433	29.7772	29.8131	29.6529	29.7486	29.6629	29.7007	29.7111	29.8425
	0.503178	-0.105521	S4R3H4;E7EQT4;Q9UKV3;G3V3B0;G3V3T3;A0A087WYN3	S4R3H4;E7EQT4;Q9UKV3	Apoptotic chromatin condensation inducer in the nucleus	ACIN1	1120					21	21	21	20.6	20.6	20.6	145.44	104.21	5874500000	64	142	26.7789	26.9467	26.7443	26.5018	26.882	26.7953	26.9108	26.8057
	2.87609	-0.258028	E9PES6;E7ES08;E7EQU1;O15347	E9PES6;E7ES08;E7EQU1;O15347	High mobility group protein B3	HMGB3	1121					5	5	5	34	34	34	17.522	58.886	8867400000	5	76	27.7257	27.8557	27.8842	27.7982	27.9969	28.1045	28.1323	28.0622
	0.0933111	-0.0695992	E7ER68;Q658Y4;G3V120;P0C866	E7ER68;Q658Y4	Protein FAM91A1	FAM91A1	1122					6	6	6	13.7	13.7	13.7	88.986	11.205	326710000	39	14	24.0272	24.6598	23.9991	24.0767	24.3648	24.307	23.6521	24.7174
	0.271498	-0.0817523	E7ERK9;Q9UI10;A0A087WW69;F8W8L6	E7ERK9;Q9UI10;A0A087WW69	Translation initiation factor eIF-2B subunit delta	EIF2B4	1124					7	7	1	22.6	22.6	3.9	59.714	25.603	913700000	25	31	25.0311	25.059	24.7672	24.839	24.9635	24.7714	25.2645	25.024
	0.762839	-0.146039	E7ERS3;Q86VM9;H3BP01;H3BRN6;H3BRH3	E7ERS3;Q86VM9	Zinc finger CCCH domain-containing protein 18	ZC3H18	1125					6	6	6	10.6	10.6	10.6	108.94	14.49	949970000	44	36	25.0497	24.7826	24.7846	24.947	24.8986	24.9603	25.205	25.084
+	1.89177	-1.93788	Q96PJ7;E7ES60;C9JBG0;C9JY26;Q9BZG1;J3QLC6	Q96PJ7;E7ES60;C9JBG0;C9JY26;Q9BZG1	Ras-related protein Rab-34	RAB34	1126					3	3	3	23.7	23.7	23.7	23.757	5.7851	498190000	14	17	25.2455	23.5244	23.654	22.597	25.7085	25.734	25.507	25.8228
	0.220959	0.0406914	E9PEI4;H0YB16;H0YBZ1;H0YBP1;E7ESA6;Q05397;B4DWJ1;E5RHD8;E5RI03;E5RJQ2;E5RG80;Q14289	E9PEI4;H0YB16;H0YBZ1;H0YBP1;E7ESA6;Q05397;B4DWJ1;E5RHD8	Focal adhesion kinase 1	PTK2	1127					6	6	6	13.5	13.5	13.5	76.797	36.078	1431500000	34	48	25.8116	25.6251	25.6702	25.4726	25.5984	25.6618	25.611	25.5457
	0.187702	-0.496134	Q9NRY5;E7ESJ7;E5RGF9	Q9NRY5;E7ESJ7	Protein FAM114A2	FAM114A2	1128					4	4	4	11.1	11.1	11.1	55.468	8.7339	310940000	31	12	23.0623	22.4816	23.1504	25.5796	25.0536	22.5778	25.7133	22.9136
	0.103006	0.0540547	H0Y4T7;E7ESY4;Q13330;F8W9Y9	H0Y4T7;E7ESY4;Q13330;F8W9Y9	Metastasis-associated protein MTA1	MTA1	1130					7	7	7	15.5	15.5	15.5	57.269	6.5911	760910000	32	17	25.1149	24.4117	24.7643	24.3077	24.7527	24.5316	24.4754	24.6228
	1.80225	-0.196202	E7ET89;Q86UW9;Q75MM6;C9JEH4;C9JII1	E7ET89;Q86UW9;Q75MM6	Probable E3 ubiquitin-protein ligase DTX2	DTX2	1132					4	4	4	8.3	8.3	8.3	57.296	8.6949	344760000	20	24	23.8048	24.0434	23.8801	23.8785	24.166	24.0435	24.1326	24.0494
	0.133994	-0.0174408	E7ETE2;P12081;A0A6Q8PHA5;A0A6Q8PF47;B4DDD8;A0A6Q8PFF2;A0A6Q8PHE3;B4E1C5;A0A6Q8PF07;A0A6Q8PFG9;A0A6Q8PFN6;A0A6Q8PHQ0;D6RF05;A0A2R8YCI2;A0A2R8YFR1	E7ETE2;P12081;A0A6Q8PHA5;A0A6Q8PF47;B4DDD8;A0A6Q8PFF2;A0A6Q8PHE3;B4E1C5;A0A6Q8PF07	Histidine--tRNA ligase, cytoplasmic	HARS	1133					20	20	13	38.3	38.3	27	57.794	115.9	6669100000	28	123	27.2548	27.0857	27.1871	27.0942	27.098	27.1914	27.2318	27.1703
	0.0539365	0.124876	E7ETU5;F6Y5H0;P29558;E7EPF2;C9J9B2;C9JIJ9;A0A1B0GUW5;Q6XE24;F8VV01	E7ETU5;F6Y5H0;P29558;E7EPF2;C9J9B2;C9JIJ9;A0A1B0GUW5;Q6XE24	RNA-binding motif, single-stranded-interacting protein 1;RNA-binding motif, single-stranded-interacting protein 3	RBMS1;RBMS3	1134					3	3	1	8.4	8.4	4.1	40.147	4.4766	631890000	11	18	25.6927	25.4043	23.576	26.0239	25.7601	25.6746	23.2458	25.5169
	0.197003	-0.0589204	H0Y9G6;E7ETU7;P09001;D6RC14;E9PF06	H0Y9G6;E7ETU7;P09001;D6RC14;E9PF06	39S ribosomal protein L3, mitochondrial	MRPL3	1135					5	5	5	17.1	17.1	17.1	40.47	47.707	979500000	18	28	24.9629	25.3079	25.3904	25.2591	25.1799	25.1486	25.4007	25.4268
	2.77057	0.134587	O00469;E7ETU9;C9JXZ0	O00469;E7ETU9	Procollagen-lysine,2-oxoglutarate 5-dioxygenase 2	PLOD2	1136					17	17	17	29	29	29	84.685	53.658	3969100000	40	107	26.2617	26.3035	26.2402	26.2409	26.1285	26.1457	26.1633	26.0704
	1.05461	0.233113	E7ETY7;Q8TED1	E7ETY7;Q8TED1	Glutathione peroxidase;Probable glutathione peroxidase 8	GPX8	1138					4	4	4	25.3	25.3	25.3	18.09	5.8951	770270000	10	16	25.9698	26.1259	25.7399	25.9646	25.793	25.4893	25.7126	25.8729
	0.766509	0.137973	E7ETZ4;Q9Y6E2;Q75MG1;B5MCH7;E7EMS9;B5MCE7;E9PFD4;E9PFE3;C9JF98;F8WDX8	E7ETZ4;Q9Y6E2;Q75MG1;B5MCH7;E7EMS9;B5MCE7	Basic leucine zipper and W2 domain-containing protein 2	BZW2	1139					13	13	12	32.8	32.8	31.1	46.913	45.815	3474900000	27	94	27.1599	26.8882	27.2082	27.0479	26.7784	26.9908	26.9859	26.9972
	0.407991	-0.867981	E7EUI8;E7EM57	E7EUI8;E7EM57	Glucose-6-phosphate 1-dehydrogenase	G6PD	1141					29	1	1	84	3.3	3.3	38.45	13.545	1431400000	25	22	22.8667	26.6931	26.1488	26.705	26.9187	26.1871	26.1736	26.6063
	0.365331	0.766374	E7EUN9;Q9NX74	E7EUN9;Q9NX74	tRNA-dihydrouridine(20) synthase [NAD(P)+]-like	DUS2	1142					4	4	4	11.6	11.6	11.6	51.388	5.6498	625820000	31	14	23.1778	25.8282	23.1417	25.0916	23.2494	22.6188	25.3049	23.0005
	1.50567	0.0734582	E7EUU4;Q04637;A0A7I2Y1C3;E9PGM1;E7EX73;C9JF13;C9J6B6;C9K073;C9J2Z7;H7C044;A0A6Q8PFB2;H7C0V6;C9JHW9;C9JIH5;REV__J3KQX6;REV__C9JQZ6;REV__Q8NEG2;REV__F5H7J8;C9JWH9;F8WCF2	E7EUU4;Q04637;A0A7I2Y1C3;E9PGM1;E7EX73	Eukaryotic translation initiation factor 4 gamma 1	EIF4G1	1143					44	44	39	30.1	30.1	27	171.64	323.31	22699000000	69	372	27.2919	27.2653	27.2822	27.3298	27.1686	27.2524	27.2606	27.1937
	2.13767	-0.223066	Q07866;G3V2E7;G3V5R9;E7EVH7;G3V3H3;F8W6L3;G5E9S8;G3V2P7;H0YJL0;H0YJT3;H0YG16;H0YJU9;H0YGB8;K7EL76;C9JZE5;Q6P597;C9J8T5	Q07866;G3V2E7;G3V5R9;E7EVH7;G3V3H3;F8W6L3;G5E9S8	Kinesin light chain 1	KLC1	1144					21	21	11	43.3	43.3	23.4	65.309	323.31	6820400000	36	139	26.68	26.8196	26.6442	26.6869	26.8494	26.9209	27.0436	26.909
	0.348916	-0.0499082	E7EVX8;Q8WWY3;E7EU94;E7ESX0;E7EN72	E7EVX8;Q8WWY3;E7EU94;E7ESX0;E7EN72	U4/U6 small nuclear ribonucleoprotein Prp31	PRPF31	1146					11	11	11	35.1	35.1	35.1	54.766	79.349	2437400000	21	94	25.602	25.4295	25.7106	25.6023	25.591	25.6193	25.65	25.6837
	1.13828	0.440927	Q8TAG9;E7EW84;B1AP46	Q8TAG9;E7EW84;B1AP46	Exocyst complex component 6	EXOC6	1147					5	5	5	8.7	8.7	8.7	93.721	8.8516	325590000	44	16	23.9998	24.1665	23.9001	24.3894	23.8812	24.0452	23.4392	23.3265
	0.0369207	-0.0172272	E7EWK3;Q9H2U1;A0A0G2JRP3;H7C514;H7C5F5;A0A0G2JQU7	E7EWK3;Q9H2U1	ATP-dependent RNA helicase DHX36	DHX36	1148					15	15	15	27.9	27.9	27.9	91.43	84.175	1539200000	37	44	24.7109	25.1662	25.3861	25.3328	25.2377	25.2568	25.1304	25.0399
	0.0763607	-0.0154405	E7EX17;P23588;F8VX11;F8VP89;F8VSC7;F8W0K0;F8VYE9;F8VRU1;REV__F8VX11;REV__P23588;REV__E7EX17	E7EX17;P23588;F8VX11;F8VP89	Eukaryotic translation initiation factor 4B	EIF4B	1152					20	20	20	37.7	37.7	37.7	69.697	211.1	19925000000	27	247	28.2155	28.1154	28.092	27.9562	28.118	27.9792	28.2184	28.1252
	2.6541	0.241373	E7EX44;E9PGZ1;Q05682;C9J813;A0A6Q8PGI1;C9JEK3;REV__H0YH95;REV__H0YEF9;REV__E9PJZ7;REV__H0YHK3;REV__Q13136;REV__A0A2R8Y7R9;REV__G3V200;REV__O75334	E7EX44;E9PGZ1;Q05682;C9J813	Caldesmon	CALD1	1153					19	19	19	35.4	35.4	35.4	64.168	102.74	6112700000	24	123	26.9273	26.9268	26.9875	26.8115	26.7493	26.6878	26.622	26.6285
	2.54714	0.187319	E9PAR0;F8VU90;Q9NYL4	E9PAR0;F8VU90;Q9NYL4	Peptidyl-prolyl cis-trans isomerase;Peptidyl-prolyl cis-trans isomerase FKBP11	FKBP11	1154					1	1	1	11.1	11.1	11.1	11.167	1.8492	394120000	3	9	24.5323	24.6556	24.6533	24.6259	24.4063	24.4218	24.5029	24.3867
	0.137236	-0.0408139	E9PB61;Q86V81	E9PB61;Q86V81	THO complex subunit 4	ALYREF	1155					7	7	7	36	36	36	27.557	218.71	12132000000	14	87	28.8361	28.561	28.9093	28.9291	28.6381	28.9278	28.9674	28.8656
+	2.39932	-1.39726	P14635;E9PC90;H0YA62	P14635;E9PC90;H0YA62	G2/mitotic-specific cyclin-B1	CCNB1	1158					2	2	2	5.5	5.5	5.5	48.337	10.066	382760000	19	14	23.7063	23.2161	23.1459	24.3394	25.3711	24.9662	24.9616	24.6979
	0.931472	-1.45266	E9PCT3;P51636	E9PCT3;P51636	Caveolin;Caveolin-2	CAV2	1159					2	2	2	26.5	26.5	26.5	12.953	9.3957	1199900000	6	16	23.6312	26.3957	25.0229	22.9807	26.2266	25.5683	26.4727	25.5735
	2.87508	-0.325381	E9PD53;Q9NTJ3;C9JR83;C9J9E4;C9JVD8;C9J578;C9JWF0;C9IYK2;C9JJ64	E9PD53;Q9NTJ3	Structural maintenance of chromosomes protein;Structural maintenance of chromosomes protein 4	SMC4	1160					30	30	30	25.7	25.7	25.7	144.45	134.29	7607800000	70	170	27.4392	27.2276	27.2996	27.4617	27.7017	27.6583	27.7095	27.66
+	5.05554	-0.3721	E9PDF6;O43795;E7EQD9;H7C2Y7;C9JYW1;A0A0U1RRI3;C9JUP5;C9K0I9	E9PDF6;O43795	Unconventional myosin-Ib	MYO1B	1161					29	29	26	32.8	32.8	29.6	128.48	323.31	9024100000	61	191	26.6947	26.6648	26.7025	26.632	27.0032	27.0919	27.0152	27.072
	0.177845	-0.15268	E9PDP5;Q8IWZ3;H0YM23;O75179;H7C2F5;H3BLS9;A0A1W2PQ15;D6RHC4;H0YLQ3	E9PDP5;Q8IWZ3	Ankyrin repeat and KH domain-containing protein 1	ANKHD1	1162					9	9	9	10.4	10.4	10.4	166.74	22.466	728720000	54	31	25.1849	23.801	24.575	24.6641	24.3047	24.5375	24.9445	25.049
	0.187076	-0.411401	E9PE17;I3L0E3;Q9Y2R5	E9PE17;I3L0E3;Q9Y2R5	28S ribosomal protein S17, mitochondrial	MRPS17;hCG_1984214	1163					3	3	3	29.5	29.5	29.5	14.374	18.237	435510000	6	11	25.0998	23.9907	23.5297	23.1298	23.2894	22.8332	25.6915	25.5814
	2.46397	-0.120962	E9PEB5;Q96AE4;M0R251;M0R263	E9PEB5;Q96AE4	Far upstream element-binding protein 1	FUBP1	1164					24	23	14	44.6	43.5	26.4	68.903	225.18	23463000000	30	244	28.1243	28.1174	28.1771	28.0605	28.2327	28.2705	28.2247	28.2353
	0.36486	-0.104989	E9PEP6;O14786;Q5JWQ4;E7EX60;Q5T7F0;Q5JWQ6;H0Y4A0	E9PEP6;O14786;Q5JWQ4;E7EX60;Q5T7F0;Q5JWQ6	Neuropilin-1	NRP1	1166					5	5	5	11.3	11.3	11.3	101.3	11.618	889520000	41	28	24.6917	24.6481	24.6893	24.9112	24.7693	25.083	24.574	24.934
	0.206901	-0.150146	E9PEP7;P08048;P17010	E9PEP7;P08048;P17010	Zinc finger Y-chromosomal protein;Zinc finger X-chromosomal protein	ZFX;ZFY	1167					1	1	1	1.5	1.5	1.5	85.197	4.7194	110820000	22	12	23.0614	22.758	23.9058	22.7861	23.4203	22.9644	23.3565	23.3707
	1.24011	-0.247047	O75694;E9PF10;D6RA13	O75694;E9PF10	Nuclear pore complex protein Nup155	NUP155	1169					23	23	23	19.5	19.5	19.5	155.2	92.391	10144000000	57	124	29.4852	29.2846	29.2612	29.5775	29.5513	29.5151	29.7038	29.8265
	0.711213	0.943541	E9PF17;P13611;Q86W61;D6RGZ6	E9PF17;P13611	Versican core protein	VCAN	1170					5	5	5	5.5	5.5	5.5	176.83	10.582	469080000	78	10	23.5271	24.8673	24.9446	25.4118	24.2599	24.7529	22.4374	23.5263
	0.675408	-0.114995	E9PF19;Q9Y4P3;Q96E41;A0A087WXC6;F8WDI9;F8WCR3	E9PF19;Q9Y4P3;Q96E41	Transducin beta-like protein 2	TBL2	1171					11	11	11	33.3	33.3	33.3	45.935	45.378	1954500000	26	71	25.5188	25.8422	25.7755	25.5892	25.8403	25.7146	25.7837	25.847
	2.18578	-0.363517	E9PFR3;Q14738;H0Y8C4;H0YN84;H0YJU0;H7C5Q9;H0YJ35;H0YJ49;Q15173	E9PFR3;Q14738;H0Y8C4	Serine/threonine-protein phosphatase 2A 56 kDa regulatory subunit delta isoform	PPP2R5D	1172					10	10	4	21.9	21.9	8.6	69.116	47.066	3056500000	28	56	26.2108	25.7972	26.0378	26.0134	26.3735	26.3109	26.4454	26.3834
	0.728978	0.102225	E9PG40;P05067;H7C0V9;A0A0A0MRG2;H7C2L2	E9PG40;P05067;H7C0V9;A0A0A0MRG2	Amyloid beta A4 protein;N-APP;Soluble APP-alpha;Soluble APP-beta;C99;Beta-amyloid protein 42;Beta-amyloid protein 40;C83;P3(42);P3(40);C80;Gamma-secretase C-terminal fragment 59;Gamma-secretase C-terminal fragment 57;Gamma-secretase C-terminal fragment 50;C31	APP	1174					13	13	12	24.5	24.5	23.4	80.832	59.761	2526100000	33	68	25.5118	25.7116	25.6417	25.5542	25.6173	25.546	25.3739	25.4731
	0.655063	-1.93399	E9PGC0;P20936	E9PGC0;P20936	Ras GTPase-activating protein 1	RASA1	1175					3	3	3	4.5	4.5	4.5	101.79	4.728	654650000	52	6	24.1889	22.234	23.1874	22.9304	27.5858	27.2272	23.0577	22.406
	1.5491	0.333045	E9PGM4;Q04446	E9PGM4;Q04446	1,4-alpha-glucan-branching enzyme	GBE1	1176					13	13	13	26.6	26.6	26.6	75.959	122.24	4042800000	31	110	26.8954	26.8309	26.612	26.81	26.7448	26.4043	26.3414	26.3256
	1.83325	-0.229017	E9PGT1;Q15631;H7C1D4;A0A0J9YVW2	E9PGT1;Q15631;H7C1D4	Translin	TSN	1177					8	8	8	39	39	39	25.572	242.43	5909700000	13	105	26.7924	26.9331	26.6461	26.6897	26.9381	26.9915	27.0465	27.0013
	0.399828	-0.4183	E9PGT3;Q15418;E9PMM7;Q5SVM7;Q5SVM6;E9PAN7	E9PGT3;Q15418	Ribosomal protein S6 kinase;Ribosomal protein S6 kinase alpha-1	RPS6KA1	1178					8	3	3	12.8	5.4	5.4	81.471	4.6267	264990000	44	4	23.6458	23.5795	23.702	23.7108	24.4405	24.5918	22.7044	24.5746
+	4.57781	-0.632551	Q99627;E9PGT6;H7C3S9	Q99627;E9PGT6;H7C3S9	COP9 signalosome complex subunit 8	COPS8	1179					5	5	5	42.6	42.6	42.6	23.225	48.594	2091200000	8	30	26.3161	26.3305	26.431	26.341	26.9893	26.9183	26.917	27.1242
	0.0714425	-0.0385776	E9PIB2;G3V1A6;P57764;E9PRF1;E9PQ48;E9PNZ0;E9PQR9	E9PIB2;G3V1A6;P57764	Gasdermin-D	GSDMD	1183					5	5	5	32.9	32.9	32.9	30.824	13.118	518050000	12	18	24.5162	24.4115	25.1037	24.5249	24.8993	24.6772	24.3691	24.765
	0.381257	-0.144784	E9PID8;P33240;E7EWR4;A0A0A0MT56	E9PID8;P33240;E7EWR4	Cleavage stimulation factor subunit 2	CSTF2	1184					8	8	6	23.7	23.7	16.4	46.665	29.812	1882400000	21	31	26.1478	26.1145	25.9618	26.1003	26.6786	26.188	26.1099	25.9271
	0.960581	0.551712	E9PJ55;Q9NUJ3;R4GNF5;E9PP52;E9PMB0	E9PJ55;Q9NUJ3;R4GNF5;E9PP52;E9PMB0	T-complex protein 11-like protein 1	TCP11L1	1188					2	2	2	4.2	4.2	4.2	67.238	6.0068	73915000	34	7	23.0255	23.1895	23.5552	23.9406	23.0374	22.7543	23.3544	22.3579
	0.0208979	-0.042479	E9PJE4;Q9GZQ3	E9PJE4;Q9GZQ3	COMM domain-containing protein 5	COMMD5	1189					2	2	2	18.7	18.7	18.7	18.487	5.7308	409740000	9	4	24.685	24.6883	22.5183	23.6155	24.4307	24.5902	24.0709	22.5851
	0.438143	-0.381202	E9PJF0;E9PQW4;P27361;B3KR49;E9PBK7;H0YDH9;E9PRH7;K7ELV1;K7EN18;P31152;Q16659	E9PJF0;E9PQW4;P27361;B3KR49;E9PBK7	Mitogen-activated protein kinase;Mitogen-activated protein kinase 3	MAPK3	1190					9	5	5	43.7	29.1	29.1	35.737	24.477	493090000	19	17	24.5842	24.7532	23.2658	24.6272	24.6328	24.5189	24.4188	25.1846
	1.39058	-1.22244	E9PJH7;Q9H936;E9PS95;A0A0D9SEI9;A0A0D9SFE1;Q9H1K4;A0A0D9SFA8;K4DIB0;K4DIA2;A0A0D9SG84;E9PI74;E9PQ36;K4DIB6;K4DIB3;K4DIB8;K4DIA8	E9PJH7;Q9H936;E9PS95;A0A0D9SEI9;A0A0D9SFE1;Q9H1K4	Mitochondrial glutamate carrier 1;Mitochondrial glutamate carrier 2	SLC25A22;SLC25A18	1192					3	3	3	9.9	9.9	9.9	33.281	5.9595	179660000	18	18	21.7854	22.8054	22.9159	24.078	24.1277	24.2061	24.1021	24.0385
	0.180277	0.185095	E9PK26;E9PMW6;Q9NRS6;E9PNI5	E9PK26;E9PMW6;Q9NRS6;E9PNI5	Sorting nexin-15	SNX15	1194					2	2	2	9.4	9.4	9.4	22.023	3.9729	221740000	9	14	23.9123	23.4863	23.5925	24.4707	23.6767	22.7477	24.0261	24.2711
	0.556555	-0.520137	E9PS17;E9PK59;Q96KG9;E9PPN3;H0YDH0;H0YCI6	E9PS17;E9PK59;Q96KG9;E9PPN3	N-terminal kinase-like protein	SCYL1	1195					6	6	4	13	13	8	85.718	5.9239	206320000	37	9	23.1416	23.2353	22.9073	23.1898	23.6259	22.432	24.3337	24.163
	0.884652	-0.0868425	H7BXH2;E9PKF6;Q5H9R7;E9PQP7;E9PK08;E9PNN8;H0YEN2;E9PJD8;E9PKG4;H0YDW1	H7BXH2;E9PKF6;Q5H9R7;E9PQP7	Serine/threonine-protein phosphatase 6 regulatory subunit 3	PPP6R3	1198					15	15	15	22	22	22	92.407	92.164	4621200000	43	107	25.9413	25.8421	25.7869	25.777	26.0071	25.9055	25.9303	25.8519
	0.165373	0.087842	E9PKG1;Q99873;E9PIX6;E9PQ98;H0YDE4;E9PNR9;E9PMW9;Q9NR22;E9PMZ2	E9PKG1;Q99873;E9PIX6;E9PQ98;H0YDE4	Protein arginine N-methyltransferase 1	PRMT1	1199					10	10	10	42.2	42.2	42.2	37.709	28.238	4660900000	20	76	27.4727	27.526	27.382	27.6791	27.8921	27.5144	26.9489	27.3529
	0.748504	0.242315	E9PKH6;E9PPW7;O00217;E9PN51;F8W9K7	E9PKH6;E9PPW7;O00217;E9PN51;F8W9K7	NADH dehydrogenase [ubiquinone] iron-sulfur protein 8, mitochondrial	NDUFS8	1200					6	6	6	40.6	40.6	40.6	15.892	31.056	1263400000	9	42	25.6017	25.6595	25.7834	25.7923	25.059	25.5116	25.7947	25.5023
	0.0967101	-0.094975	E9PKN0;E9PQ01;O94913;E9PQF9	E9PKN0;E9PQ01;O94913	Pre-mRNA cleavage complex 2 protein Pcf11	PCF11	1202					4	4	4	7	7	7	88.985	8.0197	167260000	42	7	23.4253	23.6835	22.5014	23.9521	23.4983	23.5835	23.0177	23.8427
	0.806505	-0.20852	E9PKP7;P17480;E9PMM2;E9PLT2;H0YDH7	E9PKP7;P17480	Nucleolar transcription factor 1	UBTF	1203					18	18	18	30.5	30.5	30.5	87.435	161.16	6543500000	35	138	26.7041	26.9643	26.4225	26.9411	27.0331	26.9178	26.9594	26.9559
	0.556567	-1.13062	E9PL10;Q96K17	E9PL10;Q96K17	Transcription factor BTF3;Transcription factor BTF3 homolog 4	BTF3L4	1206					4	4	4	42.1	42.1	42.1	15.779	44.038	1287700000	7	22	22.8192	26.6417	26.2625	26.8195	26.8902	26.7066	26.7762	26.6923
	0.728822	-1.44101	E9PL71;E9PN91	E9PL71;E9PN91		EEF1D	1207					7	1	1	41.7	11.2	11.2	20.819	10.498	416160000	10	8	23.5002	24.7139	24.1053	21.7343	25.9516	25.3022	25.7384	22.8256
	0.240315	-0.339936	E9PLI6;E9PS76;Q8N9N8;E9PQD0;E9PS30;E9PNH5	E9PLI6;E9PS76;Q8N9N8;E9PQD0;E9PS30	Probable RNA-binding protein EIF1AD	EIF1AD	1209					3	3	3	42.5	42.5	42.5	13.062	9.2561	554060000	6	21	24.9535	22.4143	24.5942	24.4035	24.366	24.5171	24.5421	24.3
	0.248589	-0.0257077	P55786;E9PLK3;A0A7I2V3W8;A0A7I2V389;E9PPZ2;A6NEC2;A0A7I2V604;H0YDG0;E9PP11;A0A7I2V5D4;E9PPD4;E9PJY4;H0YCQ5;E9PRQ5;E9PJ74;A0A7I2V5M8;A0A7I2YQS3;E9PJF9;A0A7I2V3D7	P55786;E9PLK3;A0A7I2V3W8;A0A7I2V389	Puromycin-sensitive aminopeptidase	NPEPPS	1210					41	41	41	51.8	51.8	51.8	103.28	323.31	26730000000	48	371	27.9116	27.7633	27.7486	27.7428	27.7843	27.812	27.8404	27.8324
	2.03946	-0.322381	E9PLL6;P46776;E9PJD9;E9PLX7	E9PLL6;P46776;E9PJD9	60S ribosomal protein L27a	RPL27A	1211					5	5	5	38.9	38.9	38.9	12.201	51.594	22946000000	6	48	29.7546	30.0212	29.9178	30.0355	30.1416	30.1777	30.349	30.3503
	0.0108278	-0.00446749	E9PLP8;Q12996;E9PJ06;H0YE74	E9PLP8;Q12996	Cleavage stimulation factor subunit 3	CSTF3	1214					6	6	6	13	13	13	86.272	18.778	936860000	37	42	25.1469	25.4344	24.8241	25.0764	24.9913	25.1947	25.2504	25.0633
	0.11364	0.0904756	E9PM75;Q9NTG7;E9PK80;E9PN58	E9PM75;Q9NTG7;E9PK80;E9PN58	NAD-dependent protein deacetylase sirtuin-3, mitochondrial	SIRT3	1216					2	2	2	6.4	6.4	6.4	37.639	3.585	139550000	18	7	23.9028	24.0009	22.9782	23.8623	23.0723	23.7181	23.7888	23.8031
	1.47176	-0.341561	E9PM92;O00193;E9PQA1;E9PRZ9	E9PM92;O00193;E9PQA1	Small acidic protein	C11orf58;SMAP	1217					4	4	4	26.1	26.1	26.1	17.634	106.1	1980300000	9	39	26.0831	25.5363	25.9215	25.7809	26.2974	26.1234	26.087	26.1802
	0.0704942	-0.0331564	E9PMC9;Q7Z589;H0YCS3;H0YET8	E9PMC9;Q7Z589	Protein EMSY	C11orf30;EMSY	1218					3	3	3	2.3	2.3	2.3	130.69	2.1283	76461000	65	7	23.2425	22.4901	22.8286	22.6448	22.88	22.9303	22.7384	22.7898
	0.0705749	-0.162731	K4DIA7;E9PMR4;P48509;E9PRJ3	K4DIA7;E9PMR4;P48509;E9PRJ3	Tetraspanin;CD151 antigen	CD151	1220					2	2	2	8.3	8.3	8.3	25.588	5.3327	675850000	10	22	25.1883	24.9774	25.6148	23.0036	25.7741	25.4469	25.058	23.156
	1.75305	0.723561	E9PMR6;Q9NZN5	E9PMR6;Q9NZN5	Rho guanine nucleotide exchange factor 12	ARHGEF12	1221					2	2	2	2.6	2.6	2.6	161.91	6.0133	102650000	70	20	22.6005	22.3756	23.3207	22.5958	21.9774	21.7784	22.1914	22.0512
	0.100206	0.0266824	E9PMS6;Q8WWI1;J3KP06;F8WD26;E9PMT2;A0A0A0MTE2;E9PMP7;H0Y424;H0YDQ3;H0YDG6;E9PJ10;E9PK58;E9PLU6;H0YE95;E9PRJ0;E9PRE3;U3KQE6	E9PMS6;Q8WWI1;J3KP06;F8WD26;E9PMT2;A0A0A0MTE2;E9PMP7;H0Y424	LIM domain only protein 7	LMO7	1222					27	27	27	27.5	27.5	27.5	145.42	200.88	4542000000	75	166	26.0743	25.8546	26.2467	26.0504	26.0702	25.9002	26.1607	25.9883
	0.547782	-0.215369	E9PN76;Q8ND24	E9PN76;Q8ND24	RING finger protein 214	RNF214	1223					2	2	2	4.7	4.7	4.7	57.571	3.2985	123520000	24	10	22.8847	22.6713	22.8087	22.7044	23.042	22.9993	23.3721	22.5171
+	2.61968	-1.41628	E9PN81;Q8TDP1	E9PN81;Q8TDP1	Ribonuclease H2 subunit C	RNASEH2C	1224					3	3	3	17.8	17.8	17.8	26.302	17.166	271970000	12	8	23.7412	22.6768	23.0375	23.2699	24.2695	24.761	25.0041	24.3559
	0.220415	0.464623	E9PNK6;E9PPQ1;J3KNE7;Q16890;E9PNQ9	E9PNK6;E9PPQ1;J3KNE7;Q16890;E9PNQ9	Tumor protein D53	TPD52L1	1226					3	3	3	21.7	21.7	21.7	18.661	20.526	852820000	8	21	25.7574	25.9981	23.9073	26.2935	23.0827	25.8051	25.7045	25.5056
	0.498881	-0.372224	E9PNR2;Q13671	E9PNR2;Q13671	Ras and Rab interactor 1	RIN1	1228					1	1	1	2.8	2.8	2.8	66.545	3.8843	167950000	26	12	23.4844	23.6434	22.7732	22.3726	22.9685	23.5183	23.5524	23.7233
	1.36403	-1.0425	E9PNW8;Q8WVX9	E9PNW8;Q8WVX9	Fatty acyl-CoA reductase 1	FAR1	1229					2	2	2	6.6	6.6	6.6	37.481	4.2072	219660000	20	11	23.0894	22.7545	22.2973	24.1933	24.1511	24.0418	24.2816	24.0299
	0.346436	-0.264387	E9PQ61;O75152;E9PBY7;A0A1B0GTU1;A0A494C0C4	E9PQ61;O75152;E9PBY7;A0A1B0GTU1;A0A494C0C4	Zinc finger CCCH domain-containing protein 11A	ZC3H11A	1230					2	2	2	5.4	5.4	5.4	72.531	16.356	294960000	32	14	24.3559	24.5801	23.3954	23.708	23.8438	24.6794	24.1771	24.3965
	0.94269	1.45357	E9PQY2;Q9NQP4	E9PQY2;Q9NQP4	Prefoldin subunit 4	PFDN4	1231					2	2	2	19.9	19.9	19.9	15.598	21.818	731560000	3	24	25.5929	25.3923	25.81	25.7508	23.5476	23.4262	26.5182	23.2396
	0.273132	-0.0395203	E9PRQ7;Q04323;E9PJ81;A0A087WTZ5	E9PRQ7;Q04323;E9PJ81;A0A087WTZ5	UBX domain-containing protein 1	UBXN1	1233					9	9	9	32.1	32.1	32.1	32.913	59.291	2089400000	13	68	25.8848	25.7393	25.9524	25.8291	25.9487	25.8354	25.8121	25.9677
+	1.81992	1.17346	E9PSI1;E9PQI5;E9PQ80;H0YI89;E9PL78;E9PJM1;E9PMQ9;O15321;E9PJC4;E9PQY7;E9PS99;G3V1B9	E9PSI1;E9PQI5;E9PQ80		CHMP4A	1235					7	2	2	11.2	3.8	3.8	92.386	8.2803	234580000	34	7	23.1147	24.2571	23.456	24.3965	22.4138	23.1043	22.4582	22.5542
	0.177361	0.104617	F2Z2U4;H0Y4W2;Q9Y4A5;A0A2R8YFJ4	F2Z2U4;H0Y4W2;Q9Y4A5	Transformation/transcription domain-associated protein	TRRAP	1236					5	5	5	1.6	1.6	1.6	436.13	7.3279	642490000	219	16	25.2251	25.0721	25.9072	24.9256	25.1555	25.3488	24.9875	25.2197
	0.561998	-0.167051	F2Z2Y6;O95777;C9JIZ0;C9JNV3	F2Z2Y6;O95777;C9JIZ0;C9JNV3	U6 snRNA-associated Sm-like protein LSm8	LSM8	1237					4	4	4	77.6	77.6	77.6	7.3713	31.343	1557400000	5	28	26.3103	26.0536	26.2974	26.3989	26.1254	26.6859	26.4053	26.5117
	1.18995	-0.27904	F5GWI9;F5GXZ7;F5GZ97;Q9Y3C0;H0YGN0	F5GWI9;F5GXZ7;F5GZ97;Q9Y3C0;H0YGN0	WASH complex subunit CCDC53	CCDC53	1239					3	3	3	17.2	17.2	17.2	18.534	2.5132	214380000	8	5	23.956	23.461	23.5736	23.5162	23.9969	23.9011	23.7624	23.9624
	1.32029	-0.199175	F5GWT4;Q9H4A3;A0A6Q8PFM0;F6UYG0	F5GWT4;Q9H4A3;A0A6Q8PFM0	Serine/threonine-protein kinase WNK1	WNK1	1240					13	13	10	6.1	6.1	4.9	225.5	33.919	1235500000	58	52	25.1876	25.096	25.1049	24.9708	25.1453	25.2068	25.4176	25.3863
	1.4891	0.35773	F5GXE4;F8WAC9;O95260	F5GXE4;F8WAC9;O95260	Arginyl-tRNA--protein transferase 1	ATE1	1241					4	4	4	10.8	10.8	10.8	58.13	10.236	290370000	21	27	24.2266	24.1759	24.3187	24.6493	23.981	24.0463	24.1276	23.7846
	1.15624	-0.511915	F5H606;I3L521;F5GXV8;F5GY08;J3KPD3;Q9Y580	F5H606;I3L521;F5GXV8;F5GY08;J3KPD3;Q9Y580	RNA-binding protein 7	RBM7	1243					1	1	1	14.6	14.6	14.6	13.704	20.754	300100000	7	15	24.0868	24.322	24.1793	23.4616	24.4316	24.6885	24.7861	24.1911
+	1.48269	-1.70925	F5H4U8;F5H7C6;F5GYF7;F5H248;Q9UBW8	F5H4U8;F5H7C6;F5GYF7;F5H248;Q9UBW8	COP9 signalosome complex subunit 7a	COPS7A	1246					2	2	2	17.6	17.6	17.6	13.663	8.0093	513720000	7	10	22.6802	23.2982	23.69	23.3055	25.7085	25.2684	23.2258	25.6082
	0.319418	-0.628117	H0YGR4;F5GYG5;Q9Y3B8;H0YG54;F5H7P1;Q9BTR4;F5H6P8;H0YG37;F5H784	H0YGR4;F5GYG5;Q9Y3B8;H0YG54	Oligoribonuclease, mitochondrial	REXO2	1247					5	5	5	33.3	33.3	33.3	22.006	11.94	469940000	10	19	25.0519	22.8343	23.205	24.1274	25.8349	24.4799	24.7907	22.6256
	0.252797	0.0620699	F5GYK2;Q9NRL3;M0R317;M0QZM0;M0QXN2;M0R2A7;M0QYS2;M0R0P4;M0R0W8;R4GN16	F5GYK2;Q9NRL3;M0R317	Striatin-4	STRN4	1248					9	9	7	19.7	19.7	18	68.584	23.516	971050000	22	60	24.7001	24.9767	24.6771	24.5736	24.6813	24.5278	24.6971	24.7729
	1.79343	-0.212963	F5GYN4;J3KR44;Q96FW1;F5H6Q1;F5GYJ8;F5H3F0	F5GYN4;J3KR44;Q96FW1;F5H6Q1;F5GYJ8;F5H3F0	Ubiquitin thioesterase OTUB1	OTUB1	1249					11	11	11	51.5	51.5	51.5	28.05	283.33	17547000000	13	151	28.5347	28.277	28.4229	28.3056	28.5575	28.5515	28.6355	28.6477
	0.440208	0.234592	F5GZI3;Q5VWU8;Q5VWV2;Q8TEW0;B1AP52	F5GZI3;Q5VWU8;Q5VWV2;Q8TEW0	Partitioning defective 3 homolog	PARD3	1250					7	7	7	13.1	13.1	13.1	82.063	16.996	531280000	43	41	24.5938	24.6173	24.0765	23.9975	24.3542	23.7982	24.4132	23.7812
	0.715691	0.994328	Q86W92;F5GZP6;A0A0A0MTP2	Q86W92;F5GZP6	Liprin-beta-1	PPFIBP1	1251					5	5	5	7.5	7.5	7.5	114.02	8.0703	457290000	49	13	24.5359	25.0318	24.341	23.2597	24.3372	24.2126	22.3605	22.281
	0.0822637	-0.0287766	F5GZY7;Q9H0R8;H6UMI1;O95166;F5GX12;F5H007;G3V1T7	F5GZY7;Q9H0R8;H6UMI1;O95166	Gamma-aminobutyric acid receptor-associated protein-like 1;Gamma-aminobutyric acid receptor-associated protein	GABARAPL1;GABARAP	1252					3	3	2	28.6	28.6	28.6	8.577	2.7074	882080000	3	15	26.3157	25.9529	26.1606	26.3985	26.2978	26.422	26.0522	26.1707
	0.431107	0.242813	F5H039;Q9NQX3;H0YJ30;G3V582;H0YJR5	F5H039;Q9NQX3;H0YJ30;G3V582	Gephyrin;Molybdopterin adenylyltransferase;Molybdopterin molybdenumtransferase	GPHN	1253					10	10	10	15.7	15.7	15.7	84.733	29.064	1147900000	40	54	25.2913	24.8519	25.8829	24.8806	24.7895	24.9768	25.1195	25.0497
	0.0640405	-0.0902901	F5H0F9;Q9UJX4;F5H3S5;H0YFB5;F5H0N1	F5H0F9;Q9UJX4	Anaphase-promoting complex subunit 5	ANAPC5	1254					3	3	3	7.1	7.1	7.1	83.674	9.6181	124280000	41	6	23.8825	22.9015	23.1067	22.8263	23.653	23.6907	23.7787	21.9557
	0.512748	-0.473996	Q15286;F5H157;F5H7F8	Q15286;F5H157	Ras-related protein Rab-35	RAB35	1256					3	3	3	15.4	15.4	15.4	23.025	4.4314	1020700000	12	18	25.4658	25.7874	24.0575	25.8161	25.9985	25.761	25.6137	25.6496
	0.283028	-0.0701013	F5H1S9;G8JLB3;Q9Y606;F5GY32;F5GXL3;F5H168;F8W9U5;F5H1B2	F5H1S9;G8JLB3;Q9Y606	tRNA pseudouridine synthase;tRNA pseudouridine synthase A, mitochondrial	PUS1	1259					11	11	11	39.8	39.8	39.8	41.729	68.504	1622100000	25	69	24.8658	25.1657	24.9829	24.7155	24.9067	25.0951	25.0255	24.9829
	2.9369	-0.204765	V9GYY3;F5H2F4;P11586;V9GZ78;A0A494C1T2;A0A8C8UXK2	V9GYY3;F5H2F4;P11586;V9GZ78;A0A494C1T2	C-1-tetrahydrofolate synthase, cytoplasmic;Methylenetetrahydrofolate dehydrogenase;Methenyltetrahydrofolate cyclohydrolase;Formyltetrahydrofolate synthetase;C-1-tetrahydrofolate synthase, cytoplasmic, N-terminally processed	MTHFD1	1262					45	45	45	61.7	61.7	61.7	99.719	323.31	49736000000	52	446	28.7531	28.744	28.7176	28.706	29.0233	28.8843	28.951	28.8812
	0.108763	-0.0356827	F5H365;Q15436;G3V4V1;G3V1W4;G3V3G5;G3V2R6;G3V5X8;G3V4Q2;A0A2R8YF30;G3V5K1;A0A2R8Y633;A0A2R8Y7S7	F5H365;Q15436	Protein transport protein Sec23A	SEC23A	1263					20	20	18	41.6	41.6	38.3	82.968	180.28	5683300000	37	141	27.0269	26.4914	26.6835	26.8861	26.8748	26.8429	26.7356	26.7773
	0.530394	0.584896	F5H3Y4;Q8IY37	F5H3Y4;Q8IY37	Probable ATP-dependent RNA helicase DHX37	DHX37	1264					3	3	3	4.6	4.6	4.6	110.69	8.5392	469480000	47	15	25.0657	25.2101	25.0089	25.0171	25.0433	24.8047	22.9821	25.1322
	1.01775	-0.194989	F5H442;Q99816;J3QRU6;J3QKS4	F5H442;Q99816	Tumor susceptibility gene 101 protein	TSG101	1265					7	7	7	16.2	16.2	16.2	40.917	13.491	1563900000	18	36	26.154	26.1719	26.3442	26.4715	26.5767	26.292	26.5307	26.5221
	1.44463	-0.235756	P55209;F8VY35;H0YIV4;F5H4R6;F8W0J6;B7Z9C2;F8VV59;F8VUX1;F8W118;F8W020;H0YHC3;F8VXI6;F8W543;H0YH88;F8VVB5;F8VRJ2;B7Z4K9	P55209;F8VY35;H0YIV4;F5H4R6;F8W0J6;B7Z9C2;F8VV59;F8VUX1;F8W118;F8W020;H0YHC3;F8VXI6;F8W543;H0YH88;F8VVB5;F8VRJ2	Nucleosome assembly protein 1-like 1	NAP1L1	1266					9	7	7	29.9	27.1	27.1	45.374	162.27	16851000000	14	99	29.0609	28.843	28.8522	28.8881	29.0202	29.1891	29.3296	29.0483
	0.00608064	-0.00263643	H0Y8R1;F5H5I6;H0YAK1;Q12849;H0YAM1	H0Y8R1;F5H5I6;H0YAK1;Q12849	G-rich sequence factor 1	GRSF1	1268					10	10	10	33.8	33.8	33.8	47.27	71.05	2444400000	21	55	25.7923	25.9459	25.5654	25.6337	25.5446	25.6515	26.0797	25.6721
	0.640708	0.374012	P12694;F5H5P2;F5GXU9	P12694;F5H5P2;F5GXU9	2-oxoisovalerate dehydrogenase subunit alpha, mitochondrial	BCKDHA	1269					4	4	4	14.6	14.6	14.6	50.47	38.556	739960000	25	36	25.481	24.2434	25.2096	24.9101	24.568	24.7946	24.3841	24.6014
	0.0485373	-0.0531678	F5H5R8;P18440	F5H5R8;P18440	Arylamine N-acetyltransferase 1	NAT1	1270					3	3	3	7.4	7.4	7.4	40.845	16.043	253050000	19	17	22.761	24.4382	24.0538	24.0556	23.547	23.9491	24.0112	24.014
	0.680888	-0.367376	F5H5U2;Q8NHQ9;E7EX41;F5H2I2;F5H735	F5H5U2;Q8NHQ9;E7EX41	ATP-dependent RNA helicase DDX55	DDX55	1271					4	4	4	12.1	12.1	12.1	65.19	11.18	164150000	32	11	23.4511	23.7945	23.8047	22.7382	23.9946	23.8254	23.8026	23.6354
	0.495979	-0.582556	H7C5W6;F5H619;Q86XA9;H0YIW3	H7C5W6;F5H619;Q86XA9	HEAT repeat-containing protein 5A	HEATR5A	1272					3	3	3	2.6	2.6	2.6	174.02	8.0805	301260000	72	13	22.5676	24.7228	23.1847	24.3834	24.7584	24.3687	23.9025	24.159
+	3.12266	-0.379285	F5H6E2;O00159;I3L501;I3L3Y6;I3L3F5	F5H6E2;O00159	Unconventional myosin-Ic	MYO1C	1273					40	40	39	43.2	43.2	42.5	118.99	291.64	18056000000	55	328	27.5981	27.5388	27.4825	27.7523	27.9918	28.005	27.9339	27.9581
	0.658242	0.0880666	Q6DD88;F5H6I7;F5GWF8	Q6DD88;F5H6I7	Atlastin-3	ATL3	1274					24	24	24	61.7	61.7	61.7	60.541	311.9	11074000000	26	222	27.4514	27.1919	27.4153	27.2943	27.2443	27.2795	27.2946	27.1822
	0.557451	-0.130191	F5H702;Q96GC5;F5H8D0	F5H702;Q96GC5	39S ribosomal protein L48, mitochondrial	MRPL48	1276					3	3	3	31.9	31.9	31.9	12.77	13.014	863100000	7	21	25.7107	25.4528	25.4534	25.7248	25.5194	25.8339	25.6633	25.8459
+	2.60824	1.12817	F5H7S7;Q13576;E7EWC2;E9PDT6;D6R999;D6RGC6;D6RDK8;D6R939	F5H7S7;Q13576;E7EWC2	Ras GTPase-activating-like protein IQGAP2	IQGAP2	1279					6	4	4	5.4	4.4	4.4	174.45	8.7211	696100000	80	19	25.839	25.4408	25.6984	25.8825	24.9571	24.1791	24.9135	24.2983
	0.69654	0.27576	F5H8F7;Q9UBL3;H0YBF6;H0YAQ0	F5H8F7;Q9UBL3	Set1/Ash2 histone methyltransferase complex subunit ASH2	ASH2L	1281					5	5	5	16.4	16.4	16.4	55.324	4.6274	791980000	29	19	25.0175	25.5429	25.7463	25.6751	25.4122	25.0274	25.366	25.0732
	0.562825	0.701506	F5H8H2;Q03426;F5H163;F5H368;A0A1W2PS16;F5GXC0;F5H092;A0A1B0GWC2	F5H8H2;Q03426;F5H163;F5H368;A0A1W2PS16;F5GXC0;F5H092	Mevalonate kinase	MVK	1282					3	3	3	10.5	10.5	10.5	37.171	4.2842	350490000	17	17	25.0357	24.8416	24.5472	24.6595	25.2073	24.1608	22.4874	24.4224
	0.698703	-1.03256	F6T1Q0;Q6L8Q7	F6T1Q0;Q6L8Q7	2,5-phosphodiesterase 12	PDE12	1283					8	8	8	28.4	28.4	28.4	52.175	50.216	1237100000	24	32	26.4376	25.3755	23.6599	23.4513	25.6453	25.8324	25.6408	25.9361
	0.244974	-0.381533	F6V2D4;H7BXD8;E9PN19;O00214	F6V2D4;H7BXD8;E9PN19;O00214	Galectin;Galectin-8	LGALS8	1285					2	2	2	7	7	7	33.985	5.8397	258570000	17	10	23.3656	24.4019	22.9676	23.3203	24.3099	24.3305	24.6836	22.2575
	0.0278189	0.0370131	F6VRR5;Q9BY77;Q8WUT1;F8WCX5;Q6R954;F8WEE2	F6VRR5;Q9BY77;Q8WUT1;F8WCX5	Polymerase delta-interacting protein 3	POLDIP3	1286					5	5	5	14.8	14.8	14.8	48.103	28.608	491590000	24	17	23.6259	24.7456	24.9303	24.9216	23.5468	24.6976	25.0372	24.7937
	0.541235	0.103337	F8VNT9;F8VV56;F8W022;F8VWK8;P08962	F8VNT9;F8VV56;F8W022;F8VWK8;P08962	Tetraspanin;CD63 antigen	CD63	1288					2	2	2	13.5	13.5	13.5	14.265	19.221	5479100000	3	26	28.4431	28.4753	28.4088	28.6306	28.3324	28.5352	28.472	28.2048
	2.36393	-0.235627	F8VPD4;P27708;H7C2E4;H7BZB3;H7C3Z5	F8VPD4;P27708	CAD protein;Glutamine-dependent carbamoyl-phosphate synthase;Aspartate carbamoyltransferase;Dihydroorotase	CAD	1289					56	55	55	37.6	37.2	37.2	236.02	323.31	21513000000	104	451	26.9774	27.0817	26.9928	27.203	27.3316	27.2927	27.2886	27.2845
	1.56821	1.18264	F8VQD4;Q8TAD7	F8VQD4;Q8TAD7	Overexpressed in colon carcinoma 1 protein	C12orf75;OCC1	1291					2	2	2	38.2	38.2	38.2	9.3362	5.2826	173470000	6	6	24.4146	24.1046	25.0459	23.1115	23.0289	23.1086	22.9349	22.8737
	0.863649	-0.977072	F8VTR4;F8W1B9;O95619	F8VTR4;F8W1B9;O95619	YEATS domain-containing protein 4	YEATS4	1295					1	1	1	15.9	15.9	15.9	13.21	2.5465	355310000	7	12	23.5624	23.1015	22.5918	24.6832	24.716	24.7895	24.9326	23.4092
	0.897815	-0.645736	F8VUJ3;Q8N4A0	F8VUJ3;Q8N4A0	Polypeptide N-acetylgalactosaminyltransferase;Polypeptide N-acetylgalactosaminyltransferase 4	POC1B-GALNT4;GALNT4	1298					6	6	6	14.3	14.3	14.3	66.237	8.3592	369710000	28	7	24.1134	22.9558	23.2921	24.4603	24.647	24.2107	24.3094	24.2375
	0.271406	0.615211	F8VUY8;Q96QD8	F8VUY8;Q96QD8	Sodium-coupled neutral amino acid transporter 2	SLC38A2	1299					1	1	1	23.9	23.9	23.9	10.027	34.468	1087500000	3	18	25.8268	26.2748	25.8732	26.021	22.5955	26.2517	26.4289	26.259
	0.651208	-0.187717	F8VVA7;P61923;F8VXB1;F8VUC5;F8W156;F8W651;F8VXR1;F8VYZ4;F8VYK5	F8VVA7;P61923;F8VXB1;F8VUC5;F8W156;F8W651;F8VXR1;F8VYZ4	Coatomer subunit zeta-1	COPZ1	1300					4	4	4	22.2	22.2	22.2	22.34	24.845	1551300000	7	22	26.6984	26.4825	26.8361	26.5214	26.9325	27.0663	26.5608	26.7297
	0.63746	1.48105	F8VVL1;O43583	F8VVL1;O43583	Density-regulated protein	DENR	1301					3	3	3	23.8	23.8	23.8	17.77	97.361	769500000	8	24	26.5728	23.1811	25.9198	23.2944	22.0266	25.1752	23.1319	22.7102
	0.0729708	0.0166316	F8VVM2;F8VWQ0;F8VWR4	F8VVM2		SLC25A3	1302					9	9	1	36.7	36.7	8.3	36.161	58.001	12818000000	18	84	29.1875	29.152	29.0514	29.195	29.2178	29.2637	28.9277	29.1102
	0.131744	-0.224904	F8VVX6;Q5HYK3;F8VP53;F8VVW7;B4DP72	F8VVX6;Q5HYK3;F8VP53;F8VVW7	2-methoxy-6-polyprenyl-1,4-benzoquinol methylase, mitochondrial	COQ5	1303					3	3	3	17.8	17.8	17.8	24.5	10.606	225770000	13	13	23.2349	24.2364	23.1326	22.9875	22.1931	23.2006	24.7084	24.389
	0.648104	-0.448401	Q16527;F8VW96;F8VQR7	Q16527;F8VW96;F8VQR7	Cysteine and glycine-rich protein 2	CSRP2	1304					2	2	2	14.5	14.5	14.5	20.954	15.981	228670000	11	8	23.7375	22.8264	24.2069	23.5389	23.5321	24.1324	24.1998	24.2391
	1.36525	-0.158861	Q8TAQ2;F8VXC8;F8VZW6	Q8TAQ2;F8VXC8	SWI/SNF complex subunit SMARCC2	SMARCC2	1305					20	20	15	23.3	23.3	18.7	132.88	105.12	4780400000	51	139	26.1076	26.0175	25.9389	26.0016	26.0653	26.1102	26.2716	26.254
	0.102968	0.0444012	Q99590;F8VXG7;A0A0A0MTP7	Q99590;F8VXG7	Protein SCAF11	SCAF11	1306					5	5	5	5.5	5.5	5.5	164.65	18.914	635690000	64	20	25.4313	25.5145	25.59	25.0794	25.3113	25.2429	25.1972	25.6862
+	2.75207	-1.21088	Q8TBF4;F8VXY6;G3V1V1	Q8TBF4;F8VXY6;G3V1V1	Zinc finger CCHC-type and RNA-binding motif-containing protein 1	ZCRB1	1307					3	3	3	19.4	19.4	19.4	24.591	9.9263	175010000	8	8	23.0119	23.0856	22.7373	23.7661	24.1855	24.3773	24.4154	24.4663
	1.16323	-0.324192	F8VYE8;P36873;F8VR82;F8W0W8;A0A087WYY5	F8VYE8;P36873;F8VR82;F8W0W8;A0A087WYY5	Serine/threonine-protein phosphatase;Serine/threonine-protein phosphatase PP1-gamma catalytic subunit	PPP1CC	1308					15	2	2	62.5	6.2	6.2	34.95	18.606	931580000	16	17	25.8406	25.5041	25.5019	25.4896	26.0404	25.9002	26.1144	25.5779
+	3.02347	0.450311	F8VYN9;P40616;B4DZG7;F8VP99;F8VP63	F8VYN9;P40616;B4DZG7	ADP-ribosylation factor-like protein 1	ARL1	1309					3	3	3	17.5	17.5	17.5	21.778	9.8502	725250000	10	21	25.4759	25.2174	25.278	25.3095	24.8043	25.0165	24.8033	24.8553
	0.225771	0.880903	F8VZX2;F8W0G4;F8VXH9;F8W1G6;H3BND9	F8VZX2;F8W0G4;F8VXH9		PCBP2	1310					16	2	0	76.6	14	0	33.8	50.584	2391200000	17	21	27.633	27.5777	27.5049	27.6818	28.4149	27.9777	28.4543	22.0269
+	1.58433	-1.52745	F8W038;Q8IXM2;H0YIS7;F8W1H0	F8W038;Q8IXM2;H0YIS7;F8W1H0	Chromatin complexes subunit BAP18	C17orf49;BAP18;RNASEK-C17orf49	1311					4	4	4	30.6	30.6	30.6	16.29	21.039	693480000	8	20	23.4838	22.4567	23.3427	24.9341	25.0927	24.8956	25.0341	25.3048
	0.064981	-0.104504	F8W0A2;Q8TB37	F8W0A2;Q8TB37	Iron-sulfur protein NUBPL	NUBPL	1312					2	2	2	18	18	18	17.397	11.319	217130000	7	12	24.8387	23.0862	23.2877	24.1058	23.4963	23.0131	24.7169	24.51
	0.406487	0.141859	F8W0Q9;Q8NEY8;F8VPY7;F8VWU8;F8VRK2;F8WF16;B7Z8L1;F8W6A0;REV__K7EN69	F8W0Q9;Q8NEY8;F8VPY7;F8VWU8	Periphilin-1	PPHLN1	1313					7	7	7	18.4	18.4	18.4	44.682	8.4663	893500000	19	37	25.6024	25.6808	25.1512	25.8573	25.3705	25.4843	25.4913	25.3781
	0.124848	-0.295318	F8W108;F8WCU9;Q68CP9;F8VWP4;A0A087WY37	F8W108;F8WCU9;Q68CP9;F8VWP4	AT-rich interactive domain-containing protein 2	ARID2	1314					3	3	3	2.8	2.8	2.8	153.12	2.9379	258820000	45	5	22.9161	23.1424	24.1127	22.9179	22.1833	22.0601	25.1978	24.8292
	1.31741	-0.249776	F8W1A4;P54819;F8VY04;A0A5K1VW67;F8VZG5;A0A5F9ZHP2;G3V213;F8VPP1	F8W1A4;P54819;F8VY04;A0A5K1VW67;F8VZG5;A0A5F9ZHP2	Adenylate kinase 2, mitochondrial;Adenylate kinase 2, mitochondrial;Adenylate kinase 2, mitochondrial, N-terminally processed	AK2	1315					11	11	11	65.5	65.5	65.5	25.63	99.105	7915600000	14	131	27.9488	27.5985	27.6873	27.8391	28.2074	27.9375	27.9872	27.9407
	1.97613	-0.162824	F8W726;Q14157;Q5VU77;Q5VU79;Q5VU78;Q5VU81;Q5VU80;H0Y5H6;H7C2T8	F8W726;Q14157	Ubiquitin-associated protein 2-like	UBAP2L	1316					20	20	20	28.8	28.8	28.8	113.63	218.04	8121000000	28	196	26.303	26.2762	26.4304	26.3875	26.579	26.5284	26.4719	26.4691
+	2.34787	-1.06303	F8W733;Q9NXR7;C9J2G0;A0A075B7D2	F8W733;Q9NXR7;C9J2G0;A0A075B7D2	BRCA1-A complex subunit BRE	BRE	1317					5	5	5	22.2	22.2	22.2	31.972	8.4284	318380000	12	17	23.0381	22.9871	22.6618	23.7747	24.3104	24.0838	24.2115	24.1083
	1.62061	0.137287	Q96A26;F8W7Q4;E9PH05	Q96A26;F8W7Q4;E9PH05	Protein FAM162A	FAM162A	1318					6	6	6	27.9	27.9	27.9	17.342	78.626	2997100000	9	47	27.3203	27.3508	27.3834	27.3453	27.194	27.2802	27.2803	27.0961
	0.850047	0.230882	F8W8I6;P31483;E5RGV5;E5RG67	F8W8I6;P31483;E5RGV5	Nucleolysin TIA-1 isoform p40	TIA1	1320					6	4	2	19.2	13.5	8.8	42.835	16.095	524800000	15	18	24.8686	25.413	24.9894	25.0556	24.6675	24.8276	24.9936	24.9143
	0.637276	0.0782871	F8W914;Q9NQC3;H7C106;A0A0U1RQR6	F8W914;Q9NQC3;H7C106	Reticulon;Reticulon-4	RTN4	1321					6	6	6	28.1	28.1	28.1	37.144	118.57	22617000000	11	108	29.4297	29.4735	29.4032	29.439	29.5204	29.3478	29.3019	29.2622
	0.40389	-0.43831	F8W9S7;Q14C86;B0QZ65;B4DGD8;C9IZ08;C9IZX9;A0A0A0MQV8;H0Y4E7;H0Y7I9	F8W9S7;Q14C86;B0QZ65;B4DGD8;C9IZ08	GTPase-activating protein and VPS9 domain-containing protein 1	GAPVD1	1323					5	5	5	3.6	3.6	3.6	157.46	12.03	709510000	56	31	25.3512	24.9746	25.2127	23.3317	25.3442	24.9021	25.2477	25.1296
	0.184164	0.0400357	F8W9X7;Q567U6	F8W9X7;Q567U6	Coiled-coil domain-containing protein 93	CCDC93	1324					5	5	5	7.6	7.6	7.6	73.041	9.0782	418350000	36	19	24.1926	24.3429	24.0977	24.3416	24.077	24.3411	24.2632	24.1333
	0.118346	-0.0572357	F8WA11;Q7Z460;H0Y5T1;C9J151;C9JP76	F8WA11;Q7Z460;H0Y5T1	CLIP-associating protein 1	CLASP1	1325					8	8	7	8.7	8.7	7.9	162.76	23.714	364350000	87	29	24.2135	23.9638	24.2201	24.1721	24.4453	24.5156	24.0363	23.8012
	1.52088	-0.461601	F8WBJ6;Q9NRX1	F8WBJ6;Q9NRX1	RNA-binding protein PNO1	PNO1	1327					4	4	4	41.2	41.2	41.2	15.175	24.068	475570000	8	22	24.7768	24.9344	24.376	24.311	25.0975	24.8955	25.1825	25.0691
	0.106157	-0.0787325	F8WCF6;P59998;F8WDD7;A0A0A6YYG9;H7C0A3;R4GN08;F8WDW3;F8WE39	F8WCF6;P59998;F8WDD7;A0A0A6YYG9;H7C0A3	Actin-related protein 2/3 complex subunit 4	ARPC4-TTLL3;ARPC4	1328					5	5	5	39.8	39.8	39.8	21.058	32.11	819300000	10	25	25.4649	24.8597	25.3613	25.8479	25.8605	25.6711	25.0746	25.2426
	0.937029	0.190594	G3V394;F8WE88;Q9Y4I1;G3V3C9	G3V394;F8WE88;Q9Y4I1	Unconventional myosin-Va	MYO5A	1331					6	6	5	4.2	4.2	3.5	215.47	7.101	2445000000	97	25	27.2769	27.3726	27.0557	27.4297	26.9995	26.9696	27.1944	27.209
	1.61472	-0.37352	F8WF48;Q99442;F8WCJ7	F8WF48;Q99442;F8WCJ7	Translocation protein SEC62	SEC62	1332					4	4	4	34.1	34.1	34.1	9.8703	17.698	1553100000	6	34	26.6058	26.3035	26.3125	26.4367	26.9542	26.9733	26.5693	26.6558
	2.47492	-0.216408	F8WJN3;Q16630;F8W084;A0A3B3ISW1	F8WJN3;Q16630	Cleavage and polyadenylation specificity factor subunit 6	CPSF6	1333					9	9	9	21.3	21.3	21.3	52.269	62.482	3987400000	15	81	26.6613	26.6711	26.6636	26.6469	26.758	26.9415	26.9564	26.8527
	0.221448	0.0361423	G3V0I5;P49821;B4DE93;H0YE81;E9PLC6;E9PQP1;E9PMX3;E9PJL9;E9PPR0;H0YD04;E9PPD6;E9PPS5	G3V0I5;P49821;B4DE93	NADH dehydrogenase [ubiquinone] flavoprotein 1, mitochondrial	NDUFV1	1334					18	18	18	57.1	57.1	57.1	50.054	83.552	5276800000	22	117	26.8769	26.9016	27.023	27.0059	26.7807	26.9409	27.0425	26.8987
	0.901448	-1.10762	G3V126;Q9UI12	G3V126;Q9UI12	V-type proton ATPase subunit H	ATP6V1H	1335					8	8	8	22.8	22.8	22.8	51.57	39.657	822890000	24	26	24.8579	23.0979	25.4134	25.133	26.6432	25.8166	25.0705	25.4025
	0.20993	-0.253949	O94766;G3V150;E9PNA1	O94766;G3V150;E9PNA1	Galactosylgalactosylxylosylprotein 3-beta-glucuronosyltransferase 3	B3GAT3	1336					2	2	2	12.5	12.5	12.5	37.121	8.757	363820000	17	21	22.861	24.647	23.9283	24.9999	24.36	24.3303	24.6099	24.1518
	1.02975	0.182516	G3V1D3;G3V180;Q9NY33;E9PQ14;E9PKK8;E9PPK9;E9PQF2;E9PNX5	G3V1D3;G3V180;Q9NY33	Dipeptidyl peptidase 3	DPP3	1338					22	22	22	43	43	43	84.304	227.52	10464000000	36	184	27.2579	27.2668	27.0119	27.4345	27.0991	26.99	27.1139	27.0381
	0.712124	-0.140312	Q12769;G3V198;E9PR16	Q12769;G3V198;E9PR16	Nuclear pore complex protein Nup160	NUP160	1339					6	6	6	5.6	5.6	5.6	162.12	17.251	830390000	60	30	25.2526	25.2272	25.0803	25.4494	25.4682	25.2377	25.4979	25.367
	0.785188	-0.161404	G3V1C3;Q9BZZ5;E9PQK6;H0YER7	G3V1C3;Q9BZZ5	Apoptosis inhibitor 5	API5	1340					11	11	11	20.4	20.4	20.4	57.56	118.51	5230300000	25	75	26.7732	27.2564	27.0175	26.9912	27.1141	27.2311	27.1565	27.1822
	0.300199	-0.339934	G3V2Q1;P07910;G3V576;G3V555;G3V575;B4DSU6;G3V5V7;A0A0G2JPF8;A0A0G2JNQ3;P0DMR1;O60812;B7ZW38;B2RXH8;G3V4M8;G3V2H6	G3V2Q1;P07910;G3V576;G3V555;G3V575	Heterogeneous nuclear ribonucleoproteins C1/C2	HNRNPC	1344					13	2	2	43.9	10.5	10.5	33.57	58.71	2093900000	17	59	26.3105	26.1976	26.7712	26.2194	28.0492	26.1793	26.5407	26.0893
	0.502501	-0.397321	G3V570;Q6V3B1;G3V563;G3V5L1;G3V2R5;P61244	G3V570;Q6V3B1;G3V563;G3V5L1;G3V2R5;P61244	Protein max	MAX	1345					2	2	2	30.2	30.2	30.2	5.1307	4.2044	211400000	3	16	23.732	23.8571	22.3759	23.2237	23.8316	23.318	23.6999	23.9284
	0.496889	0.218965	G3V2S6;Q9Y5K8;H0YJH8;G3V2V6;H0YJS0;G3V559;H0YJ55	G3V2S6;Q9Y5K8;H0YJH8;G3V2V6	V-type proton ATPase subunit D	ATP6V1D	1346					6	6	6	41.1	41.1	41.1	21.921	53.458	1103600000	10	27	25.3039	25.6989	25.5432	25.8566	25.015	25.3357	25.8095	25.3664
+	2.01321	-1.02542	G3V2U7;P07311	G3V2U7;P07311	Acylphosphatase;Acylphosphatase-1	ACYP1	1347					4	4	3	31.8	31.8	26.4	14.125	5.4653	252040000	10	10	23.9722	22.7422	23.4272	22.9616	24.3305	24.3831	24.2331	24.2582
	0.0327002	0.0146823	G3V325;C9JJT5;C9JU26;P56134;O75127	G3V325;C9JJT5;C9JU26;P56134;O75127	ATP synthase subunit f, mitochondrial;Pentatricopeptide repeat-containing protein 1, mitochondrial	ATP5J2-PTCD1;ATP5J2;PTCD1	1348					4	4	4	6.4	6.4	6.4	84.109	15.011	1462900000	40	46	26.0763	26.5158	26.3134	26.7123	26.2558	26.5783	26.4297	26.2954
	1.27477	-0.226976	G3V4C1;G3V4W0;B4DY08;B2R5W2;G3V2D6;G3V5X6;G3V3K6;G3V251	G3V4C1;G3V4W0;B4DY08;B2R5W2;G3V2D6;G3V5X6;G3V3K6;G3V251		HNRNPC	1349					13	13	2	41.4	41.4	6.5	32.238	72.551	40130000000	18	145	29.6789	29.3934	29.6662	29.7117	30.0052	29.8292	29.7963	29.7275
	2.11795	0.421764	G3V4E4;Q99538;G3V2T4;G3V4P5;H0YJN9;G3V3Z4	G3V4E4;Q99538;G3V2T4	Legumain	LGMN	1350					4	4	4	32.3	32.3	32.3	25.077	7.1849	6213700000	9	17	29.4123	29.6933	29.3834	29.4107	28.9734	29.0013	28.9522	29.2858
	0.408195	-0.291919	G3V4K3;Q9H9C1	G3V4K3;Q9H9C1	Spermatogenesis-defective protein 39 homolog	VIPAS39	1351					5	5	5	10.2	10.2	10.2	59.718	5.2127	379320000	30	11	23.3056	23.9631	23.3726	24.5991	24.0916	23.8433	24.2466	24.2266
	1.55757	-0.0992656	G3V529;Q9GZR7;F5GYL3;A0A1W2PRR2;A0A087WXU8	G3V529;Q9GZR7;F5GYL3;A0A1W2PRR2;A0A087WXU8	ATP-dependent RNA helicase DDX24	DDX24	1353					18	18	18	28.1	28.1	28.1	91.48	76.444	3679600000	43	113	25.8298	25.8444	25.7802	25.8194	25.9401	25.8565	25.8785	25.9958
	0.247622	-0.055934	G3V556;A0A0A0MTQ5;P56378	G3V556;A0A0A0MTQ5;P56378	6.8 kDa mitochondrial proteolipid	C14orf2;MP68	1355					3	3	3	33.3	33.3	33.3	11.281	1.8624	563140000	4	14	25.0667	25.3199	25.0081	25.1299	25.354	25.127	25.2023	25.065
	0.0454012	0.0212331	Q96PC5;G3V599;G3V5K6	Q96PC5;G3V599	Melanoma inhibitory activity protein 2	MIA2	1356					10	10	3	7.8	7.8	2.4	159.83	24.017	1174600000	71	42	25.325	25.2096	25.2012	24.9988	25.5666	24.8846	25.0099	25.1885
	0.906202	-1.06422	G3V5E1;O75909;G3V2Q3;G3V235	G3V5E1;O75909;G3V2Q3	Cyclin-K	CCNK	1357					3	3	3	12.2	12.2	12.2	43.404	10.238	198170000	18	12	22.6662	23.506	23.9835	22.5074	22.8063	24.4833	24.7418	24.8886
+	2.87805	-0.568464	G3V5T9;P24941;E7ESI2;K7EJ83	G3V5T9;P24941;E7ESI2	Cyclin-dependent kinase 2	CDK2	1358					11	9	8	38.7	33.2	29.2	39.178	18.815	981310000	19	41	24.3432	24.5005	24.5764	24.1914	24.848	24.9743	25.1067	24.9565
	0.204268	0.0530167	G3V5Z3;Q6IN85;H0YIY8;G3V5A2;G3V4R3;G3V231;Q5MIZ7;H0YJN6	G3V5Z3;Q6IN85;H0YIY8;G3V5A2	Serine/threonine-protein phosphatase 4 regulatory subunit 3A	SMEK1	1359					10	10	10	16.4	16.4	16.4	82.03	16.893	778620000	35	36	24.4835	24.7469	24.6552	24.4778	24.5788	24.4224	24.7431	24.4071
	0.197545	0.224938	G3XAG1;Q96ME7	G3XAG1;Q96ME7	Zinc finger protein 512	ZNF512	1360					6	6	6	13.4	13.4	13.4	64.594	10.862	241090000	23	16	23.9601	24.1808	23.258	23.9611	22.4339	23.9908	24.2165	23.8191
	0.658172	-0.616018	G3XAH6;P51003;H0YJL4;G3V457;G3V3I9;A0A0C4DGK1	G3XAH6;P51003;H0YJL4	Poly(A) polymerase alpha	PAPOLA	1361					4	4	4	7.9	7.9	7.9	80.625	7.069	292290000	38	13	23.2925	24.5505	24.7978	23.0235	24.5866	24.6979	24.4748	24.3691
	2.46394	0.32435	G3XAI2;P07942;A0A7I2V4J9;A0A7I2V5X5;A0A7I2V3I5;A0A7I2V2T9;A0A7I2V3J7;A0A7I2V682;A0A7I2V407;A0A7I2V2J0;A0A7I2V5R0;E7EPA6;A0A7I2V2R2;C9J296;A0A7I2V5T9	G3XAI2;P07942;A0A7I2V4J9;A0A7I2V5X5;A0A7I2V3I5;A0A7I2V2T9;A0A7I2V3J7;A0A7I2V682;A0A7I2V407;A0A7I2V2J0;A0A7I2V5R0	Laminin subunit beta-1	LAMB1	1362					19	19	19	16.7	16.7	16.7	182.59	113.43	3515100000	70	129	25.9777	26.1166	26.0182	26.0343	25.6249	25.8339	25.8065	25.5842
	0.0816896	0.148516	G5E975;Q12824;A0A0G2JRV3;A0A0U1RQQ2;A0A0U1RRB8;A0A2R8YEE8;A0A0G2JSE9;C9JTA6;A0A2R8Y5N5	G5E975;Q12824;A0A0G2JRV3	SWI/SNF-related matrix-associated actin-dependent regulator of chromatin subfamily B member 1	SMARCB1	1364					3	3	3	13.2	13.2	13.2	45.05	6.5059	315790000	17	14	24.4088	23.1583	24.5987	24.0688	22.8062	23.0694	24.6272	25.1377
	0.27976	0.269583	P51784;G5E9A6;Q5JXD3	P51784;G5E9A6	Ubiquitin carboxyl-terminal hydrolase 11;Ubiquitin carboxyl-terminal hydrolase	USP11	1366					5	4	4	6.6	5.7	5.7	109.82	9.5637	176450000	51	11	23.8542	24.2148	22.8994	23.7479	23.4463	23.6204	22.6111	23.9601
	0.605614	0.346459	I3L4X3;G5E9C2;Q15653;I3L1A4	I3L4X3;G5E9C2;Q15653;I3L1A4	NF-kappa-B inhibitor beta	NFKBIB	1367					5	5	5	33.5	33.5	33.5	25.119	17.885	692930000	16	36	25.8075	25.1084	25.7395	24.7731	25.1037	25.2581	24.837	24.8439
	0.048586	0.0136142	G5E9D5;Q9BQ52;E7ES68;J3QRS2;V9GYU5;J3QL08;V9GYS7;J3QLK4;H7C2I4;V9GZ72	G5E9D5;Q9BQ52;E7ES68	Zinc phosphodiesterase ELAC protein 2	ELAC2	1368					10	10	10	20.3	20.3	20.3	90.036	53.515	2042100000	43	69	25.4876	25.7053	25.3508	25.5348	25.532	25.3583	25.6702	25.4635
	1.83554	-0.350191	Q9UKF6;G5E9W3;C9JZH6	Q9UKF6;G5E9W3	Cleavage and polyadenylation specificity factor subunit 3	CPSF3	1369					9	9	9	17.7	17.7	17.7	77.485	23.201	831960000	35	37	24.3153	24.5375	24.5541	24.5754	24.9588	24.9973	24.794	24.633
	1.22016	-0.194579	G5E9Z2;Q96KA5	G5E9Z2;Q96KA5	Cleft lip and palate transmembrane protein 1-like protein	CLPTM1L	1370					5	5	5	20.9	20.9	20.9	43.28	21.354	1702700000	18	45	25.8944	25.7866	25.5511	25.8173	25.9029	26.0258	25.8732	26.026
+	2.6533	-0.615971	G5EA30;Q92879;E9PSH0;E9PKU1;E9PQK4;F5H0D8;F5H4Y5;A0A0J9YX66;A0A1B0GUN8;E9PC62;A0A1B0GU44;F5H3J7;Q5VZZ6;E9PKA1;V9GYD9;O95319;A0A0J9YXJ0	G5EA30;Q92879;E9PSH0;E9PKU1	CUGBP Elav-like family member 1	CELF1	1372					8	8	8	19.5	19.5	19.5	55.142	18.17	1567400000	17	45	25.2655	25.0526	24.9619	24.6835	25.622	25.5903	25.6076	25.6076
	0.550882	-0.492893	G5EA48;Q7Z6B7	G5EA48;Q7Z6B7	SLIT-ROBO Rho GTPase-activating protein 1	SRGAP1	1373					5	5	5	6.5	6.5	6.5	116.84	7.7617	190630000	51	7	22.058	23.9618	23.5367	23.4225	23.7762	23.6858	23.6086	23.88
	1.24396	-0.187187	G8JLA2;F8W1R7;J3KND3;G3V1V0;B7Z6Z4;P60660;F8VPF3;F8VZU9;G3V1Y7;F8W180;F8VXL3;H0YI43	G8JLA2;F8W1R7;J3KND3;G3V1V0;B7Z6Z4;P60660;F8VPF3;F8VZU9;G3V1Y7;F8W180	Myosin light polypeptide 6	MYL6	1374					7	7	5	63.8	63.8	48	17.089	120.55	39531000000	10	155	29.7348	29.4437	29.4684	29.6646	29.8148	29.8112	29.766	29.6684
	0.151554	0.0159845	P31943;G8JLB6;E9PCY7;H0YB39;H0YBD7;D6RBM0;D6RIT2;D6RIU0;D6RIH9;D6RAM1;E5RGV0;D6R9T0;D6RFM3;H0YBG7;D6RDU3;D6RJ04;E7EN40;E7EQJ0;E5RGH4;H0YAQ2;D6RDL0;D6RF17;D6R9D3	P31943;G8JLB6;E9PCY7;H0YB39;H0YBD7	Heterogeneous nuclear ribonucleoprotein H;Heterogeneous nuclear ribonucleoprotein H, N-terminally processed	HNRNPH1	1375					15	15	7	50.8	50.8	29	49.229	323.31	73970000000	18	339	30.2587	30.1841	30.1516	30.114	30.2022	30.1872	30.0855	30.1695
	0.135776	0.0443354	X6RM00;G8JLD3;X6RLX0;Q8IUD2;K7EPD6;K7EPP6;H7C4G9;O15083	X6RM00;G8JLD3;X6RLX0;Q8IUD2	ELKS/Rab6-interacting/CAST family member 1	ERC1	1376					6	6	6	8.2	8.2	8.2	111.97	12.866	448290000	49	24	24.5422	24.6859	24.129	24.4978	24.4257	24.4743	24.4554	24.3222
	0.554641	-0.901077	G8JLK1;Q9NZ43;M0QYT5	G8JLK1;Q9NZ43	Vesicle transport protein USE1	USE1	1377					3	3	3	13.7	13.7	13.7	29.098	2.8078	257510000	18	3	23.303	22.8517	24.152	23.2816	23.5445	22.6831	25.5289	25.4361
	0.177737	-0.307828	H0UI80;X6RLT1;Q8IXH7	H0UI80;X6RLT1;Q8IXH7	Negative elongation factor C/D	TH1L;NELFCD	1378					3	3	3	11.4	11.4	11.4	67.346	7.221	239230000	24	10	23.4555	24.0451	23.2721	22.4411	22.2713	22.9849	24.4964	24.6925
	0.0653619	0.0378828	Q5SW79;H0Y2V6;H0YB92	Q5SW79;H0Y2V6;H0YB92	Centrosomal protein of 170 kDa	CEP170	1379					4	4	4	4	4	4	175.29	15.179	428900000	84	27	24.6074	24.5872	23.9204	24.5352	24.7327	24.31	24.2952	24.1607
	0.876857	-1.62493	Q5QPK2;H0Y368;O60762;A0A804HJ93;A0A804HIK9;Q5QPJ9;A0A804HIB3	Q5QPK2;H0Y368;O60762;A0A804HJ93	Dolichol-phosphate mannosyltransferase subunit 1	DPM1	1380					5	5	5	22.6	22.6	22.6	32.426	26.757	851070000	16	21	23.1184	22.2075	25.751	25.8736	25.8792	25.5496	26.0032	26.0183
	1.32819	0.622509	H0Y465;P21359;J3KSB5;J3QSG6	H0Y465;P21359;J3KSB5	Neurofibromin;Neurofibromin truncated	NF1	1382					4	4	4	1.8	1.8	1.8	281.21	6.1716	87630000	118	12	23.0012	23.1888	22.9774	24.0292	22.684	22.7526	22.6081	22.6618
	0.421675	0.844561	H0Y4B0;O43414;F6QUN3;A0A3B3ISV9;F6UGJ8	H0Y4B0;O43414;F6QUN3;A0A3B3ISV9	ERI1 exoribonuclease 3	ERI3	1383					3	3	3	24.3	24.3	24.3	22.649	11.354	515250000	12	7	25.3373	25.2464	23.2658	25.275	22.8631	23.1241	26.068	23.6911
	0.371174	-0.287418	H0Y4R5;Q5SNT2	H0Y4R5;Q5SNT2	Transmembrane protein 201	TMEM201	1384					2	2	2	4.3	4.3	4.3	59.729	5.8207	336300000	20	15	24.0916	24.4278	24.1242	24.1908	23.5813	24.8191	25.0843	24.4994
	0.930879	-0.290292	H0Y621;H0Y5K5;Q9Y282;A0A1W2PPS8;A6PVJ2;A0A0C4DH46;H0Y802;H0Y6Z0	H0Y621;H0Y5K5;Q9Y282;A0A1W2PPS8	Endoplasmic reticulum-Golgi intermediate compartment protein 3	ERGIC3	1386					7	7	7	16	16	16	36.851	8.8786	1209500000	11	25	25.0534	24.8302	25.1863	25.4474	25.4321	25.1746	25.6243	25.4474
	0.981408	-0.211442	H0Y5N2;O60906	H0Y5N2;O60906	Sphingomyelin phosphodiesterase 2	SMPD2	1387					1	1	1	8.3	8.3	8.3	22.565	4.027	111420000	12	12	23.0868	22.9389	22.8428	23.0425	23.048	23.1187	23.4733	23.1167
	0.244386	-0.255533	H0Y612;Q9UPN9	H0Y612;Q9UPN9	E3 ubiquitin-protein ligase TRIM33	TRIM33	1388					4	3	3	6.5	5.6	5.6	98.891	3.6389	111970000	44	6	22.0691	23.9529	23.2371	23.3322	23.3692	23.4444	23.0057	23.7941
	0.0602613	0.0168748	H0Y614;P61960	H0Y614;P61960	Ubiquitin-fold modifier 1	UFM1	1389					3	3	3	37	37	37	8.5507	5.1607	923830000	5	23	25.6893	25.6418	25.8414	25.6595	25.9106	25.7343	25.4944	25.6253
	1.79872	-0.140141	H0Y626;O95361;B3KP96;K7ENN8;J3QKY5;K7EL43;J3QL38	H0Y626;O95361;B3KP96;K7ENN8	Tripartite motif-containing protein 16	TRIM16	1390					15	15	10	19.2	19.2	13.6	107.97	117.09	4250800000	48	97	25.7808	25.6713	25.705	25.6096	25.7665	25.862	25.8604	25.8382
	0.251822	-0.220441	H0YE12;H0Y679;Q92733	H0YE12;H0Y679;Q92733	Proline-rich protein PRCC	PRCC	1391					1	1	1	5.6	5.6	5.6	22.543	4.6605	279340000	8	7	24.3837	24.6904	24.4585	23.2657	24.1336	24.2163	24.8586	24.4717
	0.530876	1.17835	H0Y6I0;Q13439;C9JHJ5;A0A087WTW2;E7EVX2	H0Y6I0;Q13439	Golgin subfamily A member 4	GOLGA4	1392					14	14	14	8.2	8.2	8.2	246.6	39.852	1771200000	132	40	27.0345	26.7208	27.3342	26.5252	27.0008	22.7091	26.5075	26.6839
	0.578151	-0.539158	H0Y6Z7;P10586;H0Y7Z9;H0Y4H1;H0Y380	H0Y6Z7;P10586;H0Y7Z9;H0Y4H1	Receptor-type tyrosine-protein phosphatase F	PTPRF	1394					5	5	5	5.5	5.5	5.5	174.84	16.283	451600000	84	9	24.2199	22.4473	24.1388	24.1773	24.458	24.2995	24.2	24.1825
	0.221833	-0.047123	H0Y8G5;Q14103;H0YA96;D6RAF8;D6RF44;D6RD83;D6RBQ9	H0Y8G5;Q14103;H0YA96;D6RAF8	Heterogeneous nuclear ribonucleoprotein D0	HNRNPD	1396					13	13	12	43.1	43.1	40	29.667	159.69	32822000000	12	185	29.0577	29.2307	29.0696	29.2439	29.0269	29.1456	29.3149	29.303
	0.534951	0.566852	H0Y8J2;Q03188	H0Y8J2;Q03188	Centromere protein C	CENPC	1397					1	1	1	2.2	2.2	2.2	82.556	3.3136	53528000	38	15	22.4182	23.4782	23.2875	21.4559	21.6199	22.3491	22.1657	22.2377
+	4.87385	2.50125	H0Y8N7;Q9BYD6	H0Y8N7;Q9BYD6	39S ribosomal protein L1, mitochondrial	MRPL1	1398					3	3	3	13	13	13	26.614	10.066	928360000	10	11	25.712	25.9628	25.7982	25.8991	23.23	22.9181	23.4103	23.8087
	0.844166	-0.239536	H0Y8P4;Q8TED0	H0Y8P4;Q8TED0	U3 small nucleolar RNA-associated protein 15 homolog	UTP15	1399					6	6	6	17.4	17.4	17.4	61.32	23.293	1467500000	28	38	25.0921	25.343	24.8531	25.4786	25.5059	25.4039	25.4601	25.3551
	0.495471	-0.887297	H0Y8X4;O43598	H0Y8X4;O43598	2-deoxynucleoside 5-phosphate N-hydrolase 1	DNPH1	1400					5	5	5	23.5	23.5	23.5	25.868	78.866	1272700000	12	31	26.3475	26.6451	26.3637	23.2159	26.4274	26.4262	26.8213	26.4466
	0.178595	-0.0413446	H0Y938;H0YAC7;P35606;A0A7I2V258;A0A7I2V3G0;A0A7I2YQF9;D6R997;D6RBZ7;D6RCL6;D6RBG7;D6RBT6	H0Y938;H0YAC7;P35606;A0A7I2V258	Coatomer subunit beta	COPB2	1401					24	24	24	33.7	33.7	33.7	101.53	79.727	5187100000	49	114	26.8479	26.6873	26.704	26.926	26.9668	26.9365	26.7329	26.6944
	0.635686	-0.0748038	H0Y987;O95394;A0A494C0G1;J3KN95;A0A494C1E2;A0A087WT27;A0A494C1Q4;A0A494C163;A0A494C099;H0Y8I3;D6RCQ8;D6RF77;D6RCD1;D6RC77;D6RIS6;A0A494C076	H0Y987;O95394;A0A494C0G1;J3KN95;A0A494C1E2;A0A087WT27;A0A494C1Q4	Phosphoacetylglucosamine mutase	PGM3	1402					15	15	15	37.8	37.8	37.8	62.76	53.532	2794000000	33	91	25.94	25.7888	25.9004	25.9545	25.9229	25.8832	26.0076	26.0692
+	1.70403	-1.06228	H0YA52;Q9H0N5	H0YA52;Q9H0N5	Pterin-4-alpha-carbinolamine dehydratase 2	PCBD2	1406					2	2	2	21.8	21.8	21.8	13.409	2.7669	111960000	7	5	22.285	23.2836	23.6158	22.9366	24.4984	23.6959	23.901	24.2748
	0.380288	0.656669	O15013;H0YAN8;E9PB39	O15013;H0YAN8	Rho guanine nucleotide exchange factor 10	ARHGEF10	1409					8	8	7	9.4	9.4	8.8	151.61	36.249	368600000	53	23	25.2684	24.9301	24.5423	22.4011	22.694	23.2893	24.2921	24.2398
	0.106431	0.208469	H0YBL1;P29218;E5RG13;E5RIP7;E5RG94;E5RIF4;E5RHE9;E5RI82;E5RGY4	H0YBL1;P29218;E5RG13;E5RIP7	Inositol monophosphatase 1	IMPA1	1413					3	3	3	12.8	12.8	12.8	28.529	5.1139	525520000	15	17	23.8104	25.7854	25.4312	25.4813	24.4186	25.7943	23.5492	25.9124
	0.147597	-0.0643463	H0YC42;P55327;E5RFR7;H0YC44	H0YC42;P55327	Tumor protein D52	TPD52	1414					8	8	5	42.8	42.8	29.5	31.17	45.86	3221600000	13	47	26.5191	26.3624	27.1123	26.5916	26.6838	26.6337	26.796	26.7294
	0.172146	0.208125	H0YD21;I3L448;Q5TC12;H0YEW4;A8MRA7;H0YCA6	H0YD21;I3L448;Q5TC12;H0YEW4;A8MRA7	ATP synthase mitochondrial F1 complex assembly factor 1	ATPAF1	1417					3	3	3	22.4	22.4	22.4	20.737	5.3874	354450000	8	16	25.127	25.042	23.4721	24.428	23.5782	24.493	24.2879	24.8776
	0.0869147	0.0142016	H0YDB2;Q13586;G0XQ39;E9PNJ4;E9PIQ8;E9PRZ7;E9PR09;E9PN27	H0YDB2;Q13586;G0XQ39;E9PNJ4	Stromal interaction molecule 1	STIM1	1418					15	15	15	27.7	27.7	27.7	80.944	61.752	3023200000	34	107	25.8528	25.8485	25.7051	25.9822	25.7917	25.8646	25.8595	25.816
+	1.62832	1.18282	H0YDN1	H0YDN1		PLEC	1419					196	1	1	62.4	0.9	0.9	388.03	4.3581	312890000	200	11	23.8212	24.4793	23.9083	24.351	23.1979	21.9061	23.5047	23.2198
	0.218015	-0.213784	H0YDP7;Q13405;E9PNF1	H0YDP7;Q13405	39S ribosomal protein L49, mitochondrial	MRPL49	1420					5	5	5	41.7	41.7	41.7	14.572	24.006	806980000	8	28	25.391	25.1748	25.5192	23.8701	25.3541	25.3835	25.0883	24.9844
	0.805922	-0.159739	H0YDR3;Q8N5M4;E9PKV8	H0YDR3;Q8N5M4;E9PKV8	Tetratricopeptide repeat protein 9C	TTC9C	1421					3	3	3	55.1	55.1	55.1	8.1571	10.617	1114100000	4	25	25.6598	25.4141	25.6885	25.6424	25.6872	25.8948	25.8788	25.583
	0.353548	-0.111554	H0YDT0;Q96D71;E9PMG1;H0YCR2;H0YE89;H7C225;H7C1V2	H0YDT0;Q96D71;E9PMG1;H0YCR2	RalBP1-associated Eps domain-containing protein 1	REPS1	1422					4	4	4	8	8	8	81.948	8.5283	296750000	38	9	24.0092	24.217	23.8331	24.1832	23.9439	24.054	24.3731	24.3178
	0.0634787	-0.0166874	H0YDT6;O00303;A0A7I2YQA0;A0A1W2PP79;A0A7I2V4S2	H0YDT6;O00303	Eukaryotic translation initiation factor 3 subunit F	EIF3F	1423					15	15	15	49.3	49.3	49.3	37.749	210.95	15110000000	15	171	28.855	28.9772	28.8125	28.9233	28.6632	29.0635	28.9414	28.9667
	1.18643	-1.71018	H0YEB6;O60232;G3V1B8;H0YEK1;E9PN57;E9PK41	H0YEB6;O60232;G3V1B8	Sjoegren syndrome/scleroderma autoantigen 1	SSSCA1	1424					7	7	7	47.2	47.2	47.2	20.916	51.938	716080000	12	21	22.5665	25.2813	22.5237	24.9878	25.4931	25.2719	25.8255	25.6095
	0.458206	0.130972	H0YEH2;Q5T1Z4;Q5T1Z8;Q14671;E9PR38;H0YDK8;H0YC97;H0YDC5;E9PMX1	H0YEH2;Q5T1Z4;Q5T1Z8;Q14671;E9PR38;H0YDK8	Pumilio homolog 1	PUM1	1426					9	9	6	9.9	9.9	7.6	120.11	33.901	825010000	38	34	24.8347	25.0074	25.1121	24.9911	24.7507	24.6585	24.8268	25.1855
	0.724846	-0.562305	H0YF29;Q6P1X6	H0YF29;Q6P1X6	UPF0598 protein C8orf82	C8orf82	1429					5	5	5	26.8	26.8	26.8	28.487	31.039	530680000	15	22	24.4927	24.2215	24.4232	22.9242	24.5696	24.5535	24.812	24.3757
	0.156394	-0.034905	H0YFD6;P40939;A0A2R8Y4F5;A0A2R8YG21;A0A2R8Y688	H0YFD6;P40939;A0A2R8Y4F5;A0A2R8YG21	Trifunctional enzyme subunit alpha, mitochondrial;Long-chain enoyl-CoA hydratase;Long chain 3-hydroxyacyl-CoA dehydrogenase	HADHA	1430					30	30	30	54.8	54.8	54.8	86.371	323.31	28951000000	42	383	28.6025	28.6104	28.446	28.6876	28.4369	28.6509	28.628	28.7703
	0.54046	-0.557979	H0YJ17;Q8NEJ9;G3V4G1;H0YJQ1	H0YJ17;Q8NEJ9;G3V4G1	Neuroguidin	NGDN	1432					4	4	4	27.4	27.4	27.4	29.947	6.7168	232220000	11	13	23.0361	23.2258	22.6937	23.388	24.6374	22.8342	22.91	24.194
	0.767276	-0.210294	H0YKD8;P46779;H0YLP6;H0YMF4	H0YKD8;P46779;H0YLP6;H0YMF4	60S ribosomal protein L28	RPL28	1439					6	6	6	31.8	31.8	31.8	19.072	29.44	11270000000	12	51	28.9903	28.5778	28.8324	28.8766	29.1791	29.2339	28.8234	28.8819
	1.64966	-0.535906	H0YKF8;H0YLA7;H0YM11;V9GY01;Q9Y448	H0YKF8;H0YLA7;H0YM11;V9GY01;Q9Y448	Small kinetochore-associated protein	KNSTRN	1440					1	1	1	10.5	10.5	10.5	13.226	2.8899	121310000	6	16	23.1163	22.7099	22.8383	22.3588	23.1478	23.1688	23.3966	23.4538
+	2.00167	1.81269	Q08431;H0YKS8;A0A087WUV5	Q08431;H0YKS8;A0A087WUV5	Lactadherin;Lactadherin short form;Medin	MFGE8	1441					2	2	2	8.5	8.5	8.5	43.104	4.68	330780000	24	9	24.8884	24.7946	25.2896	25.2081	22.7244	22.6894	24.6481	22.868
	0.0124105	-0.00854588	Q6JHV3;H0YMI4;Q9Y6I4;H0YLB7;H0YKU8;H0YL81;H0YNX9;H0YLJ0;H0YMP6;H0YLG0	Q6JHV3;H0YMI4;Q9Y6I4;H0YLB7;H0YKU8	Ubiquitin carboxyl-terminal hydrolase;Ubiquitin carboxyl-terminal hydrolase 3	USP3	1442					5	5	5	13.7	13.7	13.7	56.648	20.653	736190000	24	30	24.841	25.3449	24.5907	25.2506	25.01	24.9578	24.6814	25.4121
	0.0759526	0.532693	H0YMV8;Q71UM5;C9JLI6;C9J1C5	H0YMV8;Q71UM5;C9JLI6	40S ribosomal protein S27;40S ribosomal protein S27-like	RPS27L	1443					4	1	1	33	11	11	11.345	11.732	4121800000	5	11	22.8876	29.303	23.0657	29.1037	28.6125	22.4768	28.6148	22.5252
	0.663225	-0.184792	H0YN26;P39687;H7BZ09;O43423;O95626	H0YN26;P39687	Acidic leucine-rich nuclear phosphoprotein 32 family member A	ANP32A	1444					10	10	7	52	52	48	19.997	170.04	23408000000	9	114	29.1572	28.8057	29.142	28.9564	29.445	29.3046	29.0185	29.0325
	1.4277	0.226688	H0YN81;Q9GZS3;H0YL19;H3BQA8;H0YMF9;H0YLA1	H0YN81;Q9GZS3;H0YL19;H3BQA8;H0YMF9	WD repeat-containing protein 61;WD repeat-containing protein 61, N-terminally processed	WDR61	1445					9	9	9	39.8	39.8	39.8	32.253	71.257	4418800000	14	90	26.4047	26.7414	26.6115	26.6984	26.3559	26.306	26.3899	26.4975
	0.455081	0.245418	H0YNA7;Q8TCT8	H0YNA7;Q8TCT8	Signal peptide peptidase-like 2A	SPPL2A	1446					2	2	2	15.4	15.4	15.4	16.432	4.7216	835170000	5	19	25.8106	25.7005	25.9499	26.3591	25.4021	25.4738	25.6992	26.2635
	2.77923	0.303482	H0YNG3;P67812;H0YNX5;H0YNA5;H0YKT4	H0YNG3;P67812;H0YNX5;H0YNA5	Signal peptidase complex catalytic subunit SEC11;Signal peptidase complex catalytic subunit SEC11A;Signal peptidase I	SEC11A	1447					5	5	5	22.1	22.1	22.1	18.651	20.078	1694000000	10	47	25.9077	25.9418	25.9338	25.9459	25.6199	25.7397	25.6764	25.4793
	0.535336	-1.35572	H0YNH5;Q7L8W6;H0YND7	H0YNH5;Q7L8W6;H0YND7	Diphthine--ammonia ligase	DPH6	1448					2	2	2	23.2	23.2	23.2	17.865	2.2343	1491400000	10	6	23.0454	22.3294	23.3579	23.3461	25.7417	26.8351	21.932	22.9929
	0.666989	1.0506	Q5SZE1;H0YNU7;Q96G23;Q5SZE3;H0YKH6;Q5SZE4;Q5SZE2;H0YLQ6	Q5SZE1;H0YNU7;Q96G23;Q5SZE3;H0YKH6;Q5SZE4;Q5SZE2	Ceramide synthase 2	CERS2	1451					5	5	5	15.8	15.8	15.8	36.373	20.14	2429400000	14	38	26.979	26.9131	26.7332	27.0805	26.9736	23.6435	26.3855	26.5009
	1.71975	-0.375455	O43488;H3BLU7;H7C5H7	O43488;H3BLU7	Aflatoxin B1 aldehyde reductase member 2	AKR7A2	1452					6	6	6	23.4	23.4	23.4	39.589	118.63	2359300000	15	54	25.9125	25.5159	25.5573	25.658	25.9402	26.0333	25.9157	26.2562
	0.21448	-0.376848	H3BM14;H3BM74;Q9Y5A7;H7C5N1;H7C5E1;C9JRT6;F8WDB6	H3BM14;H3BM74;Q9Y5A7;H7C5N1	NEDD8 ultimate buster 1	NUB1	1453					4	4	4	8.6	8.6	8.6	71.921	10.027	333760000	26	25	23.1353	24.0905	24.7408	22.7788	24.6276	24.7493	22.4568	24.419
	0.407577	-0.31546	H3BM79;Q9H8T0	H3BM79;Q9H8T0	AKT-interacting protein	AKTIP	1456					1	1	1	8.8	8.8	8.8	28.004	4.0312	103380000	14	6	22.7626	23.057	22.8489	23.2217	23.7968	23.2881	23.6978	22.3694
	0.162869	-0.108824	H3BM82;Q6FIF0	H3BM82;Q6FIF0	AN1-type zinc finger protein 6	ZFAND6	1457					2	2	2	14.9	14.9	14.9	15.858	19.979	475970000	6	20	24.9874	24.0943	24.6353	24.1868	24.3133	25.0163	24.5621	24.4473
	1.4917	-0.168386	H3BMD8;P56211;H3BTD3;H3BQ52	H3BMD8;P56211;H3BTD3;H3BQ52	cAMP-regulated phosphoprotein 19	ARPP19	1458					5	4	4	39.7	31.3	31.3	14.484	12.24	2079000000	8	38	26.371	26.4178	26.3847	26.2283	26.6077	26.5361	26.5342	26.3974
	0.328383	0.164836	H3BV80;H3BMM9;H3BTC0;Q15287;H3BPG5;H3BMS0	H3BV80;H3BMM9;H3BTC0;Q15287;H3BPG5;H3BMS0	RNA-binding protein with serine-rich domain 1	RNPS1	1460					4	4	4	29.4	29.4	29.4	24.561	80.116	2865200000	9	58	27.0834	27.1263	27.2658	26.8592	27.4527	26.5074	26.85	26.8654
	0.439724	-0.996209	H3BN98;I3L246;H3BV27;H3BT37;I3L303;H3BPJ2;Q15041	H3BN98;I3L246		RPS15A	1463					6	2	2	23.6	7.6	7.6	27.168	6.3006	2923300000	9	23	28.4092	27.5318	23.8429	27.2838	28.0228	27.9599	27.5142	27.5556
	2.67679	-0.417955	H3BNC9;P08708;H0YN88;A0A075B716;H0YN73	H3BNC9;P08708;H0YN88;A0A075B716	40S ribosomal protein S17	RPS17	1464					6	6	6	11.5	11.5	11.5	64.532	116	37062000000	25	125	30.1647	30.0029	30.0906	30.2041	30.7039	30.3717	30.5234	30.5351
	0.511689	0.125314	H3BND4;Q6P996;J3KNK7;Q86XE2;H3BNL6;A0A0J9YXH6;H3BU11;H3BQ54;Q6XYB5;Q6P474	H3BND4;Q6P996	Pyridoxal-dependent decarboxylase domain-containing protein 1	PDXDC1	1465					12	12	12	27.4	27.4	27.4	88.761	64.248	2122000000	39	59	26.1474	26.2399	26.375	25.8692	26.0789	26.0959	25.9436	26.0118
	0.217128	0.0976162	P19784;H3BNI9;H3BSA1	P19784;H3BNI9;H3BSA1	Casein kinase II subunit alpha	CSNK2A2	1466					11	11	11	41.1	41.1	41.1	41.213	84.468	4031200000	19	79	26.4864	27.1394	26.7799	26.3711	26.4849	26.5574	26.7393	26.6048
	0.125028	-0.0345383	H3BNT4;Q99547;H3BSB3;H3BNK8;H3BU96	H3BNT4;Q99547;H3BSB3	M-phase phosphoprotein 6	MPHOSPH6	1467					3	3	3	23.9	23.9	23.9	16.848	7.7279	683220000	9	23	25.1704	25.4359	25.0731	25.3463	25.4471	25.2953	25.1404	25.2811
	0.908431	0.145923	H3BP20;P06865;A0A804HKX5;A0A804HLJ5;A0A804HIQ5;H3BS10;A0A804HIC8;A0A804HIU3;H3BU85;H3BTD4;A0A804HJ97	H3BP20;P06865;A0A804HKX5;A0A804HLJ5;A0A804HIQ5;H3BS10;A0A804HIC8;A0A804HIU3;H3BU85;H3BTD4	Beta-hexosaminidase;Beta-hexosaminidase subunit alpha	HEXA	1468					13	13	13	30.9	30.9	30.9	61.999	66.205	1451500000	26	56	25.2741	25.5411	25.3286	25.304	25.2904	25.3118	25.0752	25.1867
	0.0704722	0.191414	H3BP28;Q99807;H3BSZ3;H3BTN8;I3L1T0	H3BP28;Q99807;H3BSZ3;H3BTN8;I3L1T0	5-demethoxyubiquinone hydroxylase, mitochondrial	COQ7	1469					2	2	2	18.6	18.6	18.6	21.871	10.194	340360000	12	9	23.5708	23.2701	23.8456	24.6787	25.4891	21.9169	24.9786	22.215
	0.322849	-0.106057	H3BP71;O75150;A0A087WTK2;H3BS50	H3BP71;O75150	E3 ubiquitin-protein ligase BRE1B	RNF40	1470					7	6	6	10.5	9.1	9.1	109.05	13.714	665940000	48	34	24.6219	24.6117	24.5783	24.145	24.5558	24.6599	24.7671	24.3983
	0.497034	-0.111769	H3BQK9;H3BPE1;A0A590UJG2;Q9UPN3;A0A7P0MQR8;H0Y390;A0A804HL78;H0Y4F5;H0Y314;E9PNZ4;A0A5F9ZGX0;A0A0A6YYJ5;E9PLY5;A0A669KBB0;A0A669KB06;H0Y6T5;A0A494C1U5;E9PLY0;H0YBX0	H3BQK9;H3BPE1;A0A590UJG2;Q9UPN3;A0A7P0MQR8;H0Y390;A0A804HL78	Microtubule-actin cross-linking factor 1, isoforms 1/2/3/5	MACF1	1471					41	40	38	7.4	7.3	7	861.07	128.34	4374900000	437	157	26.3399	26.3616	26.1233	26.2361	26.1772	26.3659	26.6019	26.363
	0.80984	-0.263513	H3BPG6;Q86UK7;H3BQQ2;H3BR87	H3BPG6;Q86UK7;H3BQQ2	Zinc finger protein 598	ZNF598	1472					9	9	9	12.6	12.6	12.6	98.786	31.3	622070000	44	25	24.4746	24.3941	23.922	24.1668	24.6365	24.6936	24.4477	24.2338
	0.6078	-0.16251	O96000;H3BPJ9;H3BV16	O96000;H3BPJ9;H3BV16	NADH dehydrogenase [ubiquinone] 1 beta subcomplex subunit 10	NDUFB10	1473					5	5	5	33.1	33.1	33.1	20.776	36.694	2400100000	11	29	26.8902	27.0079	26.5641	26.7898	26.9727	26.8374	27.2148	26.8771
	0.0740571	0.0187526	H3BPK3;Q16775;H3BPQ4;H3BQW8;H3BV79	H3BPK3;Q16775;H3BPQ4	Hydroxyacylglutathione hydrolase, mitochondrial	HAGH	1474					7	7	7	38.5	38.5	38.5	26.305	34.324	2635800000	13	73	26.394	26.4583	26.3204	26.4784	26.6014	26.3072	26.4474	26.22
+	3.1689	-1.45691	H3BPR2;Q13232	H3BPR2;Q13232	Nucleoside diphosphate kinase;Nucleoside diphosphate kinase 3	NME3	1477					1	1	1	15.3	15.3	15.3	9.2834	3.2917	194710000	6	7	22.7306	23.6543	22.8603	22.7821	24.3859	24.5081	24.6273	24.3335
	0.317516	-0.391348	H3BRF9;Q96K21;H3BN64;H3BRM1	H3BRF9;Q96K21;H3BN64;H3BRM1	Abscission/NoCut checkpoint regulator	ZFYVE19	1479					6	6	6	15	15	15	49.203	3.5715	474120000	28	12	25.4325	23.0321	24.8986	24.1913	24.7935	24.6249	24.8381	24.8633
	1.13471	-1.08946	H3BRL3;O14562	H3BRL3;O14562	Ubiquitin domain-containing protein UBFD1	UBFD1	1480					4	4	4	13.7	13.7	13.7	32.64	6.5471	238940000	11	10	22.634	23.0282	23.4484	23.4867	24.5932	24.7429	22.8607	24.7582
	0.204151	0.0649905	H3BTB7;Q5JPH6	H3BTB7;Q5JPH6	Probable glutamate--tRNA ligase, mitochondrial	EARS2	1482					8	8	8	28.1	28.1	28.1	56.825	59.764	1113400000	26	54	25.7232	25.5113	25.2617	25.6836	25.3015	25.468	25.5097	25.6406
	0.256341	-0.44638	H3BU49;Q9Y2Y0;H3BM52	H3BU49;Q9Y2Y0;H3BM52	ADP-ribosylation factor-like protein 2-binding protein	ARL2BP	1485					2	2	2	23.6	23.6	23.6	13.812	7.1551	378490000	6	15	25.1618	22.5672	24.5479	23.9981	24.2936	25.1166	25.3072	23.3431
	0.828177	-0.489883	H7C2Z6;H7BXD5;P28676;C9JIZ3	H7C2Z6;H7BXD5;P28676;C9JIZ3	Grancalcin	GCA	1487					3	3	3	25.3	25.3	25.3	16.712	9.489	131150000	9	3	22.8574	22.7312	23.2461	23.8062	23.9334	23.4593	23.9409	23.267
	0.0473302	0.0138202	H7BXY3;Q7L2E3	H7BXY3;Q7L2E3	Putative ATP-dependent RNA helicase DHX30	DHX30	1488					21	21	21	22.9	22.9	22.9	130.55	54.497	2277800000	74	82	25.1094	25.1391	25.3955	25.4048	25.2139	25.1679	25.4366	25.1751
	0.722131	0.571257	Q8IXI2;H7BXZ6;K7EIQ7	Q8IXI2;H7BXZ6	Mitochondrial Rho GTPase 1;Mitochondrial Rho GTPase	RHOT1	1489					4	4	3	7.3	7.3	5.5	70.783	4.8608	170130000	30	10	23.7008	23.4833	23.9328	23.3283	22.6691	23.5295	22.2069	23.7548
	0.984235	-1.34703	Q5JRG1;H7BYF2;Q9BVL2	Q5JRG1;H7BYF2;Q9BVL2	Nucleoporin p58/p45	NUPL1	1491					3	3	3	9.7	9.7	9.7	49.095	31.821	628010000	16	28	23.1404	22.3287	24.9457	25.1674	25.4031	24.8858	25.2808	25.4006
	0.934808	-0.325078	H7C051;H7BYI2;Q9NZC9	H7C051;H7BYI2;Q9NZC9	SWI/SNF-related matrix-associated actin-dependent regulator of chromatin subfamily A-like protein 1	SMARCAL1	1492					1	1	1	4.6	4.6	4.6	35.249	2.8742	87278000	14	18	22.5851	22.0613	22.0207	22.2079	22.4804	22.3092	22.8863	22.4995
	0.844497	-0.230797	H7BYJ3;O14578;A0A7I2V4A6;A0A7I2V4I0;A0A7I2V692;A0A7I2V4H7;A0A7I2V365;A0A7I2YQJ8;A0A7I2V2G7	H7BYJ3;O14578;A0A7I2V4A6;A0A7I2V4I0;A0A7I2V692;A0A7I2V4H7;A0A7I2V365	Citron Rho-interacting kinase	CIT	1493					15	15	15	10.7	10.7	10.7	187.3	50.511	1886900000	103	59	26.1458	26.2699	26.1053	26.6276	26.5505	26.4421	26.695	26.3842
	0.14436	-0.0313663	H7BYY1;F5H7S3;B7Z596;H0YKJ4;H0YK48;A0A494BZZ2;H0YL42;A0A494C0V8	H7BYY1;F5H7S3;B7Z596;H0YKJ4;H0YK48;A0A494BZZ2		TPM1	1494					15	11	2	41.9	35.9	5.6	28.747	90.766	14266000000	15	77	29.5701	29.2952	29.4744	29.2193	29.381	29.4289	29.4686	29.4061
	0.616681	-0.196851	O00422;H7BZW6;U3KPY7	O00422;H7BZW6	Histone deacetylase complex subunit SAP18	SAP18	1496					6	6	6	38.6	38.6	38.6	17.561	59.875	1980800000	11	71	25.688	25.2758	25.6478	25.4416	25.9266	25.8874	25.4433	25.5832
	0.546414	1.04927	H7C1J4;Q6BDS2;A0JNW5	H7C1J4;Q6BDS2	UHRF1-binding protein 1	UHRF1BP1	1501					3	3	3	2.1	2.1	2.1	154.72	1.7018	36155000000	64	13	31.9367	32.0048	32.229	32.124	32.2833	32.1934	28.4677	31.153
	0.323201	-0.0674443	H7C1U8;Q9BUR5;A0A0J9YWW6;G3V1B6	H7C1U8;Q9BUR5	Apolipoprotein O	APOO	1503					3	3	3	21.9	21.9	21.9	20.08	20.843	587150000	8	22	24.5955	24.8956	24.6802	24.8114	24.7458	24.6903	24.9454	24.8709
	0.0237164	0.0856476	H7C2K6	H7C2K6		EPB41L1	1505					8	1	1	40.3	4.1	4.1	29.051	5.7882	1273500000	16	14	26.5457	26.6761	26.3563	23.3609	26.6161	26.5268	26.6315	22.8221
	0.846528	-0.203147	H7C2Q8;Q99848	H7C2Q8;Q99848	Probable rRNA-processing protein EBP2	EBNA1BP2	1506					11	11	11	30.5	30.5	30.5	40.684	69.46	2456500000	19	55	26.2028	26.0594	26.2574	26.3852	26.6295	26.5657	26.217	26.3053
	1.25124	-1.72918	Q9BV44;H7C3J3;H7C0R6	Q9BV44;H7C3J3;H7C0R6	THUMP domain-containing protein 3	THUMPD3	1507					2	2	2	7.1	7.1	7.1	57.002	30.449	723010000	25	16	23.045	26.0179	22.9236	23.4382	25.6535	25.7245	25.4252	25.5382
	0.0589379	0.0128622	H7C5G1;Q2TAA2;C9JE02;C9JDY4;C9J5J2	H7C5G1;Q2TAA2;C9JE02	Isoamyl acetate-hydrolyzing esterase 1 homolog	IAH1	1510					4	4	4	21.1	21.1	21.1	25.085	69.724	1823100000	10	49	25.7153	25.5641	25.485	25.4423	25.5845	25.3939	25.5807	25.5961
	1.07724	0.286593	H8Y6P7;P0CAP2	H8Y6P7;P0CAP2	DNA-directed RNA polymerase II subunit GRINL1A	GCOM1;POLR2M	1512					2	2	2	3.4	3.4	3.4	87.806	3.6441	115230000	49	22	22.392	22.5074	22.7145	22.3946	22.535	22.107	22.2213	21.9988
	2.33116	-0.325509	I3L0A0;Q13404;G3V2F7;A0A0A0MSL3;E5RIF1;D6RG00;Q5TGE2;A5PLL7	I3L0A0;Q13404;G3V2F7;A0A0A0MSL3	Ubiquitin-conjugating enzyme E2 variant 1	TMEM189-UBE2V1;UBE2V1	1513					8	8	3	22.4	22.4	7.3	42.208	18.402	4235600000	18	47	27.0543	27.2239	27.2259	27.2611	27.6709	27.4999	27.3894	27.507
	0.0186245	-0.00415134	I3L0H8;Q9NUU7;F6QDS0;I3L352;H3BTB3;J3QRH0;H3BSL8;H0YD26;A0A1B0GV69;E9PR46;J3QL17;Q9UHL0	I3L0H8;Q9NUU7;F6QDS0;I3L352	ATP-dependent RNA helicase DDX19A	DDX19A	1514					11	11	3	31.5	31.5	9.8	50.519	54.671	1942400000	27	57	26.3546	26.4459	26.5551	26.6431	26.4032	26.53	26.4796	26.6024
	0.980707	-0.26671	Q9H6Y7;I3L0L6;I3L2Y3	Q9H6Y7;I3L0L6;I3L2Y3	E3 ubiquitin-protein ligase RNF167	RNF167	1515					2	2	2	5.7	5.7	5.7	38.298	2.1565	113270000	9	8	23.2195	23.0809	22.7203	22.8217	23.4003	23.0202	23.2741	23.2147
	1.00101	0.118403	I3L0N3;P46459;I3L2G1;I3L0L3;K7EQD6;I3L338;I3L4Q9	I3L0N3;P46459	Vesicle-fusing ATPase	NSF	1516					29	29	28	49.8	49.8	48.8	82.091	159.45	7813800000	47	197	26.298	26.3718	26.106	26.3449	26.1601	26.1367	26.1859	26.1643
	1.32002	-0.555142	I3L0U5;Q6PK04	I3L0U5;Q6PK04	Coiled-coil domain-containing protein 137	CCDC137	1517					3	3	3	12	12	12	33.524	4.8659	177340000	13	20	23.1066	23.5589	23.3304	23.3297	24.0252	23.2797	24.1543	24.087
	0.0135416	0.00428009	I3L1P8;Q02978	I3L1P8;Q02978	Mitochondrial 2-oxoglutarate/malate carrier protein	SLC25A11	1520					9	9	9	40.5	40.5	40.5	32.182	61.214	2644500000	17	59	27.0821	26.7345	26.7229	27.0003	26.8574	27.0234	26.7599	26.882
	1.41945	0.383595	Q96CP2;I3L1Y9;I3L4I0	Q96CP2;I3L1Y9;I3L4I0	FLYWCH family member 2	FLYWCH2	1522					2	2	2	16.4	16.4	16.4	14.563	9.9613	598410000	9	26	25.0083	25.2555	24.8883	24.883	24.4809	24.5833	24.9637	24.4728
+	4.09478	-0.736399	J3QS48;I3L295;J3KTK8;J3QQZ4;J3KT75;J3QW43;J3QRD5;O75352;I3L405;I3L261;I3L1D2;J3KSI4;I3L4E0	J3QS48;I3L295;J3KTK8;J3QQZ4;J3KT75;J3QW43;J3QRD5;O75352;I3L405;I3L261;I3L1D2;J3KSI4;I3L4E0	Mannose-P-dolichol utilization defect 1 protein	MPDU1	1523					4	4	4	42.6	42.6	42.6	10.978	9.5928	661420000	4	21	24.6026	24.5434	24.4366	24.6701	25.4228	25.3821	25.2119	25.1814
	0.439809	-0.559777	I3L2C6;Q8IXI1;H3BST5;H3BUX4	I3L2C6;Q8IXI1;H3BST5	Mitochondrial Rho GTPase 2	RHOT2	1524					4	3	3	30.8	25.7	25.7	23.704	5.8065	681180000	12	15	22.7458	24.7743	24.5553	25.3896	24.976	24.9104	24.8498	24.9679
	0.26974	-0.412851	K7EPR7;I3L2H7;P62253	K7EPR7;I3L2H7;P62253	Ubiquitin-conjugating enzyme E2 G1;Ubiquitin-conjugating enzyme E2 G1, N-terminally processed	UBE2G1	1527					2	2	2	26.9	26.9	26.9	8.979	4.4206	289180000	2	17	24.1638	23.3888	22.6772	24.2996	24.7539	24.5265	22.5445	24.3559
	0.502096	-0.46076	I3L2N2;O14641;A0A3B3ITC6;I3L0M7;I3L2W9;Q92997	I3L2N2;O14641	Segment polarity protein dishevelled homolog DVL-2	DVL2	1530					3	3	3	4	4	4	78.375	13.863	82053000	30	20	22.9861	23.4581	22.5473	23.3918	23.8531	22.4687	23.9688	23.9359
	0.494205	0.487466	I3L2Q8;Q9UIC8;H3BUP7;I3L4A2	I3L2Q8;Q9UIC8	Leucine carboxyl methyltransferase 1	LCMT1	1531					3	3	3	32.8	32.8	32.8	13.74	5.5462	342470000	7	9	24.6657	24.7206	23.9203	24.3133	22.7711	23.8886	24.5927	24.4175
	0.339175	0.0399742	I3L397;I3L504;P63241;Q6IS14;F8WCJ1;C9J7B5;C9J4W5;Q9GZV4	I3L397;I3L504;P63241;Q6IS14	Eukaryotic translation initiation factor 5A;Eukaryotic translation initiation factor 5A-1;Eukaryotic translation initiation factor 5A-1-like	EIF5A;EIF5AL1	1532					12	12	12	50	50	50	16.019	323.31	136330000000	8	330	31.948	31.7825	31.9401	31.799	31.8162	31.7648	31.8698	31.8589
	0.341207	-0.524805	I3L4G8;I3L4A1;Q96FZ7;I3L3E4	I3L4G8;I3L4A1;Q96FZ7;I3L3E4	Charged multivesicular body protein 6	CHMP6	1534					2	2	2	13.3	13.3	13.3	20.167	3.234	87186000	7	5	22.433	22.5406	23.8206	23.3396	24.6049	24.1876	23.4239	22.0166
	0.178079	-0.230011	J3KQU4;I3L4I4;O75674;I3L4G0;I3L367;I3L1G1;I3L3M3;I3L3T4;I3NI44;I3L0N2;I3L1Q1;I3L4N3	J3KQU4;I3L4I4;O75674;I3L4G0;I3L367;I3L1G1	TOM1-like protein 1	TOM1L1	1535					5	5	5	21.7	21.7	21.7	51.686	31.722	432020000	15	26	24.7724	22.6779	24.712	24.3893	24.5808	24.2975	24.1388	24.4544
	1.59932	0.0851064	I3L4X2;P33527;A0A0A0MS99;A0A7I2V2E0;A0A7I2V4C6	I3L4X2;P33527;A0A0A0MS99;A0A7I2V2E0	Multidrug resistance-associated protein 1	ABCC1	1536					24	24	24	23.4	23.4	23.4	160.44	152.54	7605600000	67	179	26.7259	26.7594	26.7214	26.752	26.7292	26.6349	26.601	26.6531
	0.357114	-0.0777807	I3VM54;Q9Y2K7	I3VM54;Q9Y2K7	Lysine-specific demethylase 2A	KDM2A	1537					2	2	2	1.7	1.7	1.7	130.66	2.5381	174300000	59	10	23.4645	23.5289	23.45	23.6058	23.4644	23.8462	23.545	23.5047
	0.543189	-0.2074	Q92785;J3KMZ8;E9PN04	Q92785;J3KMZ8	Zinc finger protein ubi-d4	DPF2	1540					4	4	4	15.1	15.1	15.1	44.155	11.752	456790000	22	25	23.9526	24.2174	24.1768	23.9775	24.6821	23.9678	24.4274	24.0766
	0.105419	0.0611506	J3KNF4;O14618;E9PP76;E9PK03	J3KNF4;O14618;E9PP76	Copper chaperone for superoxide dismutase;Superoxide dismutase [Cu-Zn]	CCS	1544					5	5	5	17.6	17.6	17.6	27.086	8.0292	725370000	13	23	25.0326	24.8092	25.268	24.7495	25.1987	25.2228	24.5523	24.6409
	0.586321	-0.699816	Q12788;J3KNP2;A0A087WYP7	Q12788;J3KNP2;A0A087WYP7	Transducin beta-like protein 3	TBL3	1545					6	6	6	10.6	10.6	10.6	89.034	20.661	600400000	45	18	24.0237	24.9287	22.9373	25.1465	24.9704	25.6571	24.5416	24.6664
	0.153982	-0.0344825	J3QL05;J3KP15;Q01130	J3QL05;J3KP15;Q01130	Serine/arginine-rich splicing factor 2	SRSF2	1546					5	5	3	46.2	46.2	34.6	15.156	82.485	7986000000	6	57	28.2416	28.1315	28.3028	28.1692	28.0553	28.2712	28.4289	28.2276
	0.987151	-0.140171	J3KPP4;O95232;D6RDI2;D6RHH0;H7C5U7;U3KQT3;C9JL41;H0YA81	J3KPP4;O95232;D6RDI2	Luc7-like protein 3	LUC7L3	1547					9	9	9	20.2	20.2	20.2	58.22	85.82	2777000000	21	64	26.1116	26.209	26.391	26.2236	26.4141	26.4566	26.374	26.2513
	0.60374	0.187102	J3KPS0;Q9NXW2;V9GYN7;V9GY70	J3KPS0;Q9NXW2;V9GYN7	DnaJ homolog subfamily B member 12	DNAJB12	1548					5	5	5	17.8	17.8	17.8	45.489	35.749	1526800000	21	52	25.6222	25.7985	25.4753	25.8167	25.8303	25.2461	25.4288	25.4591
	0.250563	-0.0309339	J3KQ32;Q9NTK5;C9JTK6;C9JCJ9	J3KQ32;Q9NTK5	Obg-like ATPase 1	OLA1	1549					20	20	20	55	55	55	46.937	177.12	16850000000	27	177	27.6131	27.4147	27.5387	27.4335	27.518	27.4828	27.5546	27.5683
	0.66609	-2.43526	J3KQ34;Q9H9Q2;J3QT73;A0A087X1P5;J3KQ41;J3QT95	J3KQ34;Q9H9Q2;J3QT73;A0A087X1P5;J3KQ41	COP9 signalosome complex subunit 7b	COPS7B	1550					5	5	5	32.6	32.6	32.6	26.424	19.995	1295700000	11	14	23.7894	26.8272	22.2142	22.6544	22.0683	27.7455	27.3542	28.0582
	0.544411	-0.0973144	J3KQ48;Q9Y3E5	J3KQ48;Q9Y3E5	Peptidyl-tRNA hydrolase 2, mitochondrial	PTRH2	1551					5	5	5	47.2	47.2	47.2	19.325	50.252	1976400000	8	61	26.0911	25.9244	26.1893	26.2095	26.2087	26.2183	26.0633	26.3131
	1.25359	0.186127	J3KQJ1;Q8NBJ7;C9JL30;C9J660;A8MXB9;H7C3B2;A0A494C1B1;F8WA42;E9PBT8;E9PG02;J3QT17;F8WEX5;F8WEV7;F8WES7	J3KQJ1;Q8NBJ7;C9JL30;C9J660;A8MXB9;H7C3B2;A0A494C1B1;F8WA42;E9PBT8	Sulfatase-modifying factor 2	SUMF2	1554					9	9	9	31.9	31.9	31.9	35.922	52.536	3029200000	16	71	26.6462	26.4663	26.2837	26.5381	26.2842	26.3403	26.3149	26.2504
	0.556009	0.265614	Q9BQE5;J3KQL8;E9PM95	Q9BQE5;J3KQL8	Apolipoprotein L2	APOL2	1555					4	4	4	13.1	13.1	13.1	37.092	9.7407	705470000	17	22	25.062	25.1442	24.9611	25.1718	25.415	24.8283	24.6393	24.3941
	0.342502	-0.452867	M0QXG9;M0R3F4;M0R2A4;M0R2K3;M0R193;M0R0I0;J3KQS6;Q9NWV8;M0R2I2;M0R3H9	M0QXG9;M0R3F4;M0R2A4;M0R2K3;M0R193;M0R0I0;J3KQS6;Q9NWV8;M0R2I2	BRISC and BRCA1-A complex member 1	BABAM1	1557					3	3	3	55.6	55.6	55.6	11.545	16.423	192880000	6	17	23.1207	24.7425	23.4771	22.9125	24.1013	22.8879	24.4709	24.6042
	0.554331	-1.06911	J3KR35;Q8WUD4	J3KR35;Q8WUD4	Coiled-coil domain-containing protein 12	CCDC12	1558					2	2	2	22.3	22.3	22.3	20.501	36.224	247700000	10	7	22.9584	22.8213	23.2965	22.4075	25.3705	22.1887	22.6658	25.5353
	0.256037	-0.0371237	J3KRE2;P52565;J3KTF8;J3QQX2;J3KS60	J3KRE2;P52565;J3KTF8;J3QQX2;J3KS60	Rho GDP-dissociation inhibitor 1	ARHGDIA	1560					8	8	4	72.9	72.9	34.9	14.814	178.46	18978000000	6	99	29.6505	29.7792	29.7387	29.6782	29.6114	29.7458	29.8599	29.778
	0.170106	-0.124201	J3KRL6;O94916	J3KRL6;O94916	Nuclear factor of activated T-cells 5	NFAT5	1561					2	2	2	14.7	14.7	14.7	15.537	2.3941	85283000	7	12	22.4839	22.8822	22.3739	21.6897	22.7999	22.4958	22.4963	22.1344
	0.0167895	-0.0368695	J3KS15;Q14197	J3KS15;Q14197	Peptidyl-tRNA hydrolase ICT1, mitochondrial	ICT1	1562					3	3	3	17.7	17.7	17.7	21.905	8.3876	468350000	11	24	25.7363	24.5387	23.5251	24.3842	25.0897	22.8204	25.2513	25.1704
	1.65368	-0.661201	J3KS22;J3QS36;Q7Z4W1;J3QS45;J3KSZ5;J3QL34;J3KRZ4	J3KS22;J3QS36;Q7Z4W1;J3QS45;J3KSZ5;J3QL34	L-xylulose reductase	DCXR	1563					3	3	3	15.2	15.2	15.2	23.803	9.3534	362610000	14	16	23.0517	23.3188	23.7873	23.9558	24.3271	24.204	24.1786	24.0487
	0.434752	0.387435	J3KS94;J3QQK6;P02686	J3KS94;J3QQK6;P02686	Myelin basic protein	MBP	1565					2	2	2	18.9	18.9	18.9	17.442	4.7251	266470000	6	9	23.6139	24.6524	24.0526	24.1435	24.2264	24.065	22.744	23.8773
	1.77226	-0.138356	J3KTA4;P17844;A0A7I2V507;A0A7I2V2S0;A0A0G2JLI4;A0A7I2V5F5;J3QRQ7;J3KRZ1;J3QSF1;J3KTQ4;J3QR02;X6RLV5;J3QRN5;J3QLG9;J3QR62	J3KTA4;P17844;A0A7I2V507;A0A7I2V2S0;A0A0G2JLI4;A0A7I2V5F5	Probable ATP-dependent RNA helicase DDX5	DDX5	1568					35	34	27	59.3	57.5	45.4	69.086	323.31	59826000000	32	421	29.0938	29.0846	29.1104	29.1361	29.3529	29.1563	29.2267	29.2426
	0.586109	0.0732865	J3KTL2;Q07955;J3KSR8;J3QQV5;J3KSW7	J3KTL2;Q07955	Serine/arginine-rich splicing factor 1	SRSF1	1570					16	16	15	45.8	45.8	43.1	28.329	103.95	20607000000	14	196	29.3168	29.2287	29.4615	29.3165	29.1773	29.2945	29.2299	29.3287
	0.426101	0.169847	J3QL56;O75880	J3QL56;O75880	Protein SCO1 homolog, mitochondrial	SCO1	1572					6	6	6	23.7	23.7	23.7	30.178	43.258	2240900000	15	46	26.1491	26.7976	26.3888	26.1279	26.2457	25.9994	26.4007	26.1381
	0.393102	-0.559975	J3QL71;Q96FV2;J3QRJ1;J3KT79;J3QR84;J3QQM9;J3KS57	J3QL71;Q96FV2	Secernin-2	SCRN2	1573					7	7	7	23.1	23.1	23.1	47.493	25.065	554730000	15	26	22.7216	25.51	23.775	24.7436	24.7929	24.2845	24.9657	24.9469
	1.33234	-0.430846	X6R3T8;J3QLH3;J3QQJ0;Q9UHR5;J3KS14;F5H478;J3KRU5;J3QLM2;J3KRR6	X6R3T8;J3QLH3;J3QQJ0;Q9UHR5;J3KS14;F5H478;J3KRU5	SAP30-binding protein	SAP30BP	1574					3	3	3	18.7	18.7	18.7	26.276	7.3986	390360000	14	12	24.1504	23.7927	23.512	24.0367	24.0803	24.5528	24.3335	24.2486
	0.00120844	0.000388145	J3QLS3;Q9Y2R9;J3QQS1;J3KSI8;J3QKW2	J3QLS3;Q9Y2R9;J3QQS1;J3KSI8;J3QKW2	28S ribosomal protein S7, mitochondrial	MRPS7	1575					8	8	8	33.6	33.6	33.6	31.704	25.161	1486600000	12	34	25.67	26.042	25.9603	26.0801	25.8708	25.9535	26.0813	25.8452
	0.506409	-0.114996	J3QQ67;Q07020;G3V203;H0YHA7;F8VUA6;F8VYV2;A0A075B7A0;F8VXR6	J3QQ67;Q07020;G3V203;H0YHA7;F8VUA6;F8VYV2;A0A075B7A0	60S ribosomal protein L18	RPL18	1576					6	6	6	36.3	36.3	36.3	21.728	72.158	15352000000	7	54	28.8709	28.5652	28.8239	28.8866	29.0993	28.8885	28.7533	28.8655
	0.664087	1.79037	J3QRI7;J3QQQ9;J3QQV1;J3QRC4;P61254;J3KS10;J3KSS0	J3QRI7;J3QQQ9;J3QQV1;J3QRC4;P61254	60S ribosomal protein L26	RPL26	1578					7	1	1	52.3	8.4	8.4	12.63	13.773	5099500000	6	33	28.9441	28.6222	28.9368	28.9228	28.4564	28.12	28.498	23.1901
	1.57098	-0.549992	J3QQW9;Q15022	J3QQW9;Q15022	Polycomb protein SUZ12	SUZ12	1579					2	2	2	3.5	3.5	3.5	80.321	3.5478	187150000	36	10	23.0992	23.4368	22.9899	22.9321	23.4229	24.0844	23.4656	23.685
+	3.03242	0.388595	J3QQZ9;Q9NVS9;J3QQV6;A0A286YFL3	J3QQZ9;Q9NVS9;J3QQV6;A0A286YFL3	Pyridoxine-5-phosphate oxidase	PNPO	1580					12	12	12	53.4	53.4	53.4	27.312	323.31	7139400000	11	133	26.9661	26.9753	26.9056	26.8584	26.4477	26.5463	26.6991	26.458
	0.00847348	-0.00308323	J3QR07;Q96MU7	J3QR07;Q96MU7	YTH domain-containing protein 1	YTHDC1	1581					4	4	4	5.3	5.3	5.3	85.586	8.5995	803650000	24	27	25.0854	25.4199	25.1143	25.4829	25.2072	25.2148	25.478	25.2147
	0.563656	0.0922318	J3QRS3;P19105;O14950;P24844;J3KTJ1	J3QRS3;P19105;O14950;P24844;J3KTJ1	Myosin regulatory light chain 12A;Myosin regulatory light chain 12B;Myosin regulatory light polypeptide 9	MYL12A;MYL12B;MYL9	1582					12	12	12	61	61	61	20.457	228.58	18187000000	10	191	28.1929	28.3922	28.0915	28.1578	27.9947	28.1654	28.1587	28.1467
	0.231028	-0.0661077	J3QRS9;O43670;X6R4W8;J3KS31;J3QS27;J3KTL1;J3KRB6;J3KRW6;H0Y3M2	J3QRS9;O43670;X6R4W8	BUB3-interacting and GLEBS motif-containing protein ZNF207	ZNF207	1583					5	5	5	12.6	12.6	12.6	52.541	21.443	4392400000	14	52	27.0645	27.558	27.3994	27.3991	27.4273	27.3524	27.3447	27.561
	0.398038	-0.510374	J3QRV5;Q6P1M3;J3KRE1;J3QLV4;J3QRZ8;J3QL58;J3QSA6	J3QRV5;Q6P1M3	Lethal(2) giant larvae protein homolog 2	LLGL2	1584					4	4	4	5.3	5.3	5.3	113.38	28.731	623420000	44	32	23.3689	24.9655	25.134	25.3599	25.0703	24.6339	26.1803	24.9853
	1.82568	-0.180223	O43684;J3QT28;J3QSX4	O43684;J3QT28	Mitotic checkpoint protein BUB3	BUB3	1586					14	14	14	61.3	61.3	61.3	37.154	323.31	13515000000	15	176	27.4555	27.5409	27.4455	27.3887	27.6962	27.557	27.7272	27.5712
	0.566132	-0.775503	J3QTA6;Q9BRQ6;H0Y922;J3QTB2	J3QTA6;Q9BRQ6;H0Y922	MICOS complex subunit MIC25	CHCHD6	1588					5	5	5	21.9	21.9	21.9	28.817	17.671	991690000	11	24	25.2127	25.6007	22.8899	25.4417	25.5386	25.4819	25.4706	25.7559
	0.28871	-0.261459	J9JIC5;Q9HAS0;J3KRR1;K7EII1;K7ERX0;J3QKQ1;K7EIQ2	J9JIC5;Q9HAS0;J3KRR1	Protein Njmu-R1	C17orf75	1589					6	6	6	24.5	24.5	24.5	44.609	21.879	398060000	23	16	24.0273	24.0595	22.5282	23.8453	23.8177	24.1472	23.8362	23.705
	0.141798	-0.0491958	K7EIE8;O95983;A0A087WT34;A0A087X1H1;A0A0A0MTS6	K7EIE8;O95983	Methyl-CpG-binding domain protein 3	MBD3	1590					3	3	3	18.7	18.7	18.7	26.322	12.396	354060000	12	25	24.3762	24.0964	24.4701	24.111	24.4783	24.268	24.0724	24.4318
+	2.62316	-1.63388	K7EIU8;Q13485;K7ENG1;K7EL15;K7EL18;K7EIJ2;K7ES96	K7EIU8;Q13485;K7ENG1;K7EL15;K7EL18;K7EIJ2;K7ES96	Mothers against decapentaplegic homolog;Mothers against decapentaplegic homolog 4	SMAD4	1594					2	2	2	4.4	4.4	4.4	50.052	2.4479	238210000	19	4	22.7623	22.8629	23.0921	22.2855	24.5393	23.6048	24.4811	24.9131
	1.4293	0.083806	K7EJE8;K7EKE6;P36776;K7ER27;K7ERR6;K7EQF8;K7ER56	K7EJE8;K7EKE6;P36776	Lon protease homolog, mitochondrial	LONP1	1597					24	24	24	37.4	37.4	37.4	93.296	217.52	6106500000	36	177	26.9602	26.9449	26.9077	26.9294	26.8066	26.9147	26.7971	26.8887
	1.01653	-0.119159	K7EJL1;Q9BXS5;E7ENJ6;K7EQX3;A0A087WZX7;Q9Y6Q5;K7EK69;K7ERH5;K7EPJ8;K7EL08;K7EJJ1	K7EJL1;Q9BXS5;E7ENJ6;K7EQX3	AP-1 complex subunit mu-1	AP1M1	1598					10	10	10	37.6	37.6	37.6	40.296	30.453	2814700000	21	61	25.7233	25.9726	25.853	25.8914	26.0572	25.99	25.9088	25.9609
	2.47841	-0.209653	K7EQ55;K7EK33;Q96EP5;K7EQ02	K7EQ55;K7EK33;Q96EP5;K7EQ02	DAZ-associated protein 1	DAZAP1	1601					8	8	8	33.7	33.7	33.7	43.312	107.95	6509500000	10	96	27.7582	27.7528	27.5995	27.7615	27.9299	27.8748	27.9755	27.9304
	0.593303	0.23805	K7EK56;Q9UFG5;K7ER12;K7EQW1;A0A087WUU5;K7ELZ1;E7EP72	K7EK56;Q9UFG5;K7ER12;K7EQW1;A0A087WUU5;K7ELZ1;E7EP72	UPF0449 protein C19orf25	C19orf25	1602					2	2	2	26.2	26.2	26.2	17.116	13.276	106630000	7	5	23.4205	22.8715	23.5163	23.1542	23.0276	23.0748	23.2429	22.665
	1.0163	-0.555308	Q9BZL4;K7EL81;K7ER83	Q9BZL4;K7EL81	Protein phosphatase 1 regulatory subunit 12C	PPP1R12C	1606					4	4	4	6.4	6.4	6.4	84.88	15.29	191470000	41	14	22.3327	22.6434	23.4863	23.3411	23.4206	23.6669	23.4969	23.4403
	1.56487	-0.273304	K7ELG9;Q3MHD2	K7ELG9;Q3MHD2	Protein LSM12 homolog	LSM12	1607					3	3	3	22.2	22.2	22.2	24.955	24.144	1041000000	12	25	25.5607	25.527	25.8715	25.8423	25.9356	26.0283	25.928	26.0028
	2.3922	-0.193386	K7ELL7;P14314;K7EPW7;A0A7I2V2T6;K7EKX1;K7EJ70;A0A0C4DGP4;K7EIP3	K7ELL7;P14314;K7EPW7;A0A7I2V2T6	Glucosidase 2 subunit beta	PRKCSH	1608					20	20	20	42.2	42.2	42.2	60.192	323.31	20792000000	20	220	28.2212	28.2128	28.1747	28.3001	28.3396	28.4247	28.5049	28.4131
	0.0296835	0.00836229	K7EM09;K7EPR0;K7ELQ9;Q6UW68	K7EM09;K7EPR0;K7ELQ9;Q6UW68	Transmembrane protein 205	TMEM205	1609					2	2	2	25	25	25	13.389	29.876	3110300000	3	20	27.313	27.3591	27.4786	27.5666	27.54	27.5637	27.2465	27.3336
	0.589818	-0.149781	P41567;K7EM18;K7EQP2	P41567;K7EM18	Eukaryotic translation initiation factor 1	EIF1	1611					6	6	2	75.2	75.2	26.5	12.732	207.37	11813000000	5	60	28.5981	28.0876	28.2042	28.1361	28.3821	28.3554	28.4036	28.4842
	0.302663	-0.244723	V9GZ55;K7ENR6;Q969U7	V9GZ55;K7ENR6;Q969U7	Proteasome assembly chaperone 2	PSMG2	1614					3	3	3	12.4	12.4	12.4	23.506	1.7188	140260000	9	7	23.6995	23.8774	23.3873	22.9383	24.2156	23.758	23.9471	22.9608
	0.0673568	0.0368991	K7EQ03;K7EP90;Q9BTD8;K7ER08;K7EML2	K7EQ03;K7EP90;Q9BTD8;K7ER08	RNA-binding protein 42	RBM42	1616					4	4	4	14.3	14.3	14.3	44.638	13.829	882620000	14	28	25.2648	26.0331	25.9319	25.4345	25.6139	25.5462	25.5655	25.7912
	0.0723779	-0.145683	K7EQV2;O95707;K7ESH8;K7ERD7	K7EQV2;O95707	Ribonuclease P protein subunit p29	POP4	1620					3	3	3	24	24	24	17.429	5.7477	314380000	7	11	24.7883	22.9573	24.2644	22.6371	23.7289	24.5298	24.5624	22.4085
	0.947686	-0.133262	K7ER00;Q9Y285;K7EPH2;K7ER16;K7EK06;K7ERS0	K7ER00;Q9Y285;K7EPH2;K7ER16	Phenylalanine--tRNA ligase alpha subunit	FARSA	1622					18	18	18	45.6	45.6	45.6	62.395	251.76	10471000000	25	206	27.2927	27.4023	27.2563	27.4628	27.4069	27.3842	27.5983	27.5578
	0.523866	-1.07941	K7ERE1;Q8N2U0;K7ESI7;K7ENI6	K7ERE1;Q8N2U0;K7ESI7;K7ENI6	Transmembrane protein 256	TMEM256	1623					2	2	2	64.7	64.7	64.7	7.1301	20.634	2216200000	3	25	26.1483	25.1384	25.0924	25.4493	25.1262	29.2281	26.0817	25.7101
	0.959375	-0.103373	K7ERV3;P04183;K7ES52;K7ERJ1	K7ERV3;P04183;K7ES52;K7ERJ1	Thymidine kinase;Thymidine kinase, cytosolic	TK1	1624					4	4	2	21.7	21.7	12.7	28.594	13.547	1777000000	13	54	25.6697	25.5481	25.6917	25.5975	25.6483	25.8548	25.7179	25.6995
	0.208422	-0.354588	K7ESF4	K7ESF4			1626					6	3	0	46.4	23.4	0	22.671	14.815	386310000	9	14	24.5815	22.9737	24.2569	24.3264	24.8455	25.0212	22.677	25.0132
	0.394006	0.2635	K7ESP4;Q8WVC6	K7ESP4;Q8WVC6	Dephospho-CoA kinase domain-containing protein	DCAKD	1628					2	2	2	11.5	11.5	11.5	24.177	5.9173	223530000	12	19	23.5979	23.8045	23.9506	24.1559	22.8139	23.8743	23.8022	23.9645
	0.00184014	0.0011034	L0R6Q1	L0R6Q1		SLC35A4	1629					4	4	4	49.5	49.5	49.5	11.133	41.221	1259200000	5	35	25.5861	26.3088	25.4824	26.0548	25.7376	25.8536	25.9261	25.9103
+	3.83906	-0.439993	M0QWZ7;Q9NP81;M0R2C6;B4DJM9;M0R259;M0R2H5;M0QX29;M0R1C0	M0QWZ7;Q9NP81;M0R2C6;B4DJM9	Serine--tRNA ligase, mitochondrial	SARS2	1632					15	15	15	40.7	40.7	40.7	58.182	119.6	2720700000	31	87	25.7186	25.7058	25.8683	25.6263	26.1968	26.1767	26.1622	26.1432
	0.350771	-0.140975	M0QXD6;P35269;M0R0R9;M0R0Z3	M0QXD6;P35269;M0R0R9;M0R0Z3	General transcription factor IIF subunit 1	GTF2F1	1633					6	6	6	18	18	18	48.595	17.527	787350000	18	26	24.5793	25.0719	24.8153	24.7008	24.5911	25.257	24.8965	24.9867
	1.4001	0.280213	M0QY97;Q9UPT8	M0QY97;Q9UPT8	Zinc finger CCCH domain-containing protein 4	ZC3H4	1635					13	13	13	24.4	24.4	24.4	95.425	37.684	1761200000	35	64	25.0532	25.1788	25.0713	25.0547	24.7953	24.6055	25.0934	24.743
	0.71832	-1.16541	M0QYA2;Q9NWS0;M0QYF4;M0R3A4;M0R0J2;M0R028;M0R2P8;M0R3A8;M0QZM3;M0QXD5	M0QYA2;Q9NWS0;M0QYF4;M0R3A4	PIH1 domain-containing protein 1	PIH1D1	1636					4	4	4	29.7	29.7	29.7	30.672	10.049	362110000	16	16	23.7649	24.2272	21.9514	23.0889	22.5697	25.0715	25.0147	25.0381
	0.144764	-0.183983	M0QYH2;Q96T60;M0R3C8;A0A0D9SFL2;M0QYI1;A0A0D9SFD6;A0A0D9SEV0;M0R000	M0QYH2;Q96T60;M0R3C8;A0A0D9SFL2;M0QYI1;A0A0D9SFD6	Bifunctional polynucleotide phosphatase/kinase;Polynucleotide 3-phosphatase;Polynucleotide 5-hydroxyl-kinase	PNKP	1638					4	4	4	11.8	11.8	11.8	53.64	11.068	304940000	30	13	22.5185	24.3212	24.5887	24.0434	23.6479	24.1153	24.2061	24.2384
	2.41463	-0.423342	M0QYT0;M0R280;M0QXS7	M0QYT0			1639					13	4	0	62	20.6	0	35.904	81.246	4307800000	14	67	27.1223	27.3083	27.1117	27.0567	27.7739	27.5923	27.4983	27.4278
	1.28253	-0.503326	M0QYT9;Q14653;M0R0X9;M0QXC8;M0R205;M0QZB8;M0QZB7;M0R0R8;M0QX56;M0R3C2	M0QYT9;Q14653;M0R0X9;M0QXC8;M0R205;M0QZB8;M0QZB7;M0R0R8	Interferon regulatory factor 3	IRF3	1640					4	4	4	26	26	26	30.779	22.504	695670000	16	16	24.9898	24.2874	25.0315	25.2295	25.419	25.4592	25.3632	25.3101
	0.293973	-0.498417	M0QZ12;Q96CP6;S4R3I2;M0R0J9	M0QZ12;Q96CP6	GRAM domain-containing protein 1A	GRAMD1A	1641					9	9	9	17.2	17.2	17.2	89.734	20.006	867020000	41	33	25.2243	25.4167	22.3789	24.6702	24.6128	25.1637	24.9702	24.9371
	0.210778	-0.0504284	M0QZR4;Q92888;M0QYC1;M0R2C7;M0QYS3;M0QZH8;M0R3H5;REV__Q9BZR6;REV__H7C0V4;REV__H7C215	M0QZR4;Q92888;M0QYC1	Rho guanine nucleotide exchange factor 1	ARHGEF1	1643					23	23	23	29.8	29.8	29.8	108.32	109.75	4936600000	47	168	26.0115	26.2879	25.9765	26.2694	26.2936	26.1519	26.2277	26.0738
	1.75017	-0.212699	M0R0F0;P46782;M0R0R2;M0QZN2	M0R0F0;P46782;M0R0R2;M0QZN2	40S ribosomal protein S5;40S ribosomal protein S5, N-terminally processed	RPS5	1644					9	9	9	52.5	52.5	52.5	22.391	188.74	33744000000	10	184	28.7932	28.9491	28.6742	28.8387	29.11	28.9535	29.0393	29.0032
	0.82502	0.448929	M0R0Q5;M0R398	M0R0Q5;M0R398		ZNF414	1646					1	1	1	14.2	14.2	14.2	12.036	2.8172	62228000	9	16	22.1076	22.1744	22.8306	22.944	22.414	22.2284	21.9529	21.6657
	0.376981	0.0554523	M0R117;Q02543;M0R3D6;M0R1A7;M0R0P7	M0R117;Q02543;M0R3D6;M0R1A7;M0R0P7	60S ribosomal protein L18a	RPL18A	1647					6	6	6	39	39	39	18.079	71.78	13811000000	9	72	28.686	28.808	28.7157	28.6114	28.5064	28.6685	28.6943	28.7301
	0.190464	-0.0688524	M0R165;Q9UBC2;M0R2S2;M0R3I1;K7EJR2;M0R330;M0QX30;M0R1V5	M0R165;Q9UBC2;M0R2S2	Epidermal growth factor receptor substrate 15-like 1	EPS15L1	1648					8	8	8	19.6	19.6	19.6	83.474	22.654	724050000	44	30	24.8427	25.2674	25.0065	25.0379	24.8194	25.3622	25.0941	25.1542
	0.94312	-0.942765	M0R1Y2;P24390	M0R1Y2;P24390	ER lumen protein-retaining receptor;ER lumen protein-retaining receptor 1	KDELR1	1650					2	1	1	14.1	9.1	9.1	24.844	12.456	121800000	10	13	22.2342	23.6157	22.5793	22.894	24.8383	23.7266	23.7272	22.8022
	0.288977	-0.0545301	M0R2B7;P28340;A0A087WYJ2;M0QZR8;A0A2R8Y7K6;A0A2R8Y705;M0QXE6;M0QXQ2;M0R3H8	M0R2B7;P28340;A0A087WYJ2;M0QZR8;A0A2R8Y7K6	DNA polymerase;DNA polymerase delta catalytic subunit	POLD1	1651					17	17	17	22.4	22.4	22.4	126.39	66.802	1467500000	67	60	25.8811	25.835	25.7221	26.01	26.0406	25.8099	25.8591	25.9568
	0.307653	0.0403109	M0R2Z9;Q8IX01;M0R3F6;M0R1Y3;M0R2Y3;M0R065;M0R216	M0R2Z9;Q8IX01;M0R3F6	SURP and G-patch domain-containing protein 2	SUGP2	1655					7	7	7	7.8	7.8	7.8	121.54	13.178	450410000	47	18	24.6471	24.5193	24.581	24.6691	24.5208	24.4735	24.5869	24.6741
	1.02119	0.211458	M0R3G1;Q99633;Q5T9P8;Q5T9P7	M0R3G1;Q99633;Q5T9P8;Q5T9P7	Pre-mRNA-splicing factor 18	PRPF18	1656					2	2	2	15.8	15.8	15.8	23.131	9.2893	209520000	11	23	23.6941	24.1701	23.9338	24.0323	23.7252	23.6735	23.7369	23.849
	0.127292	-0.0160012	O00116;B7Z3Q4;A0A7P0T984;A0A1B0GWA2;A0A7P0TAL3;A0A2R8YEL0;A0A7P0TAU9;A0A7P0T9C9;A0A7P0T8Q7;A0A7P0TA54;B8ZZ81;A0A7P0T857	O00116;B7Z3Q4;A0A7P0T984;A0A1B0GWA2;A0A7P0TAL3;A0A2R8YEL0;A0A7P0TAU9	Alkyldihydroxyacetonephosphate synthase, peroxisomal	AGPS	1657					23	23	23	51.8	51.8	51.8	72.911	157.77	7968800000	35	212	26.5951	26.5995	26.5745	26.4366	26.4946	26.5851	26.6235	26.5664
	0.0782656	0.0224214	O00148;K7EQN7;K7EPJ3;K7EN69;K7ENP6;A0A0G2JHN7;A0A0D9SEM9;K7EL56;K7EIL8;F6U6E2;F6S2B7;F6SXL5	O00148;K7EQN7	ATP-dependent RNA helicase DDX39A	DDX39A	1658					20	8	8	53.9	27.2	27.2	49.129	59.58	2988500000	19	77	25.9783	26.1609	26.3123	26.2164	26.1614	26.1915	26.2914	25.934
	0.3393	0.111025	O00151	O00151	PDZ and LIM domain protein 1	PDLIM1	1659					16	16	16	74.5	74.5	74.5	36.071	323.31	14260000000	16	196	27.7693	27.5842	27.4586	27.4432	27.1134	27.5043	27.6579	27.5357
	1.89551	-0.576489	O00154;K7EKP8	O00154;K7EKP8	Cytosolic acyl coenzyme A thioester hydrolase	ACOT7	1660					5	5	4	17.1	17.1	15.3	41.796	27.389	1237500000	20	37	25.4017	25.3314	25.0703	25.7322	25.8979	26.2294	25.9017	25.8126
	1.49705	-0.252769	O00161;H3BNE1;H3BR18;H3BM38;H3BPJ0;H3BV99;H3BP15;H3BQY9;H3BNG6;H3BU94;H3BR99	O00161;H3BNE1;H3BR18;H3BM38;H3BPJ0	Synaptosomal-associated protein 23;Synaptosomal-associated protein	SNAP23	1661					7	7	7	38.4	38.4	38.4	23.354	23.692	1500000000	12	46	25.5832	25.3197	25.5146	25.4953	25.8139	25.8523	25.5321	25.7256
	0.703601	-0.49501	O00165;E9PIQ7;Q5VYD6	O00165;E9PIQ7	HCLS1-associated protein X-1	HAX1	1662					3	3	3	19.4	19.4	19.4	31.62	6.5854	287210000	17	12	24.2318	24.5069	24.1347	23.03	24.1739	24.6464	24.4632	24.5999
	0.39368	0.466901	O00186	O00186	Syntaxin-binding protein 3	STXBP3	1663					7	7	7	14.2	14.2	14.2	67.764	13.934	741830000	30	22	25.2279	25.3658	25.1931	25.2527	23.2423	25.4145	25.1981	25.3171
	1.12879	0.184812	O00194;K7ES41;H3BUD9;H3BS49;H3BVH7;H3BN55;P51159;H3BU81	O00194;K7ES41	Ras-related protein Rab-27B	RAB27B	1664					6	6	6	38.1	38.1	38.1	24.608	18.586	1620000000	13	42	25.7601	26.1168	25.8443	25.8816	25.703	25.6696	25.6619	25.8291
	0.273122	0.0459609	O00203;H0YBD0;A0A590UJU7;A0A590UJU0;A0A590UJE5;A0A590UJ60;A0A590UK04;A0A5F9UJV3;A0A2R8Y2A8;A0A590UKC4;Q13367;A0A590UK64;A0A590UKD3	O00203	AP-3 complex subunit beta-1	AP3B1	1665					15	15	15	15.8	15.8	15.8	121.32	65.56	3115400000	55	105	26.2006	26.3724	26.2746	26.479	26.3328	26.3429	26.1929	26.2741
	1.56142	-0.106789	O00231;J3QRY4;J3QS13;J3KSW3	O00231	26S proteasome non-ATPase regulatory subunit 11	PSMD11	1667					24	24	24	62.3	62.3	62.3	47.463	152.64	21588000000	27	264	28.3053	28.3116	28.2611	28.1764	28.4254	28.3319	28.3597	28.3647
	0.0306144	0.00604248	O00232;J3KTJ5;J3KSK1	O00232	26S proteasome non-ATPase regulatory subunit 12	PSMD12	1668					13	13	13	34.4	34.4	34.4	52.904	75.566	4337300000	25	100	26.7849	26.8501	26.6491	26.8082	26.6262	26.8232	26.7547	26.8641
	1.37869	-0.157784	O00233;J3KN29;F5H5V4;F5GX23;F5H169;F5H7X1	O00233;J3KN29;F5H5V4;F5GX23;F5H169	26S proteasome non-ATPase regulatory subunit 9	PSMD9	1669					10	10	10	44.8	44.8	44.8	24.682	216.44	6565100000	12	108	26.954	26.7609	26.9532	26.9545	27.1647	26.9838	27.0442	27.0611
+	3.92005	0.496889	O00264	O00264	Membrane-associated progesterone receptor component 1	PGRMC1	1670					12	12	11	63.1	63.1	58.5	21.671	71.774	11847000000	8	76	28.922	29.0051	29.0509	29.0086	28.3715	28.4812	28.6051	28.5412
	0.602657	-0.0607419	O00267	O00267	Transcription elongation factor SPT5	SUPT5H	1671					12	12	12	16.6	16.6	16.6	121	88.238	2937600000	51	89	25.6323	25.6659	25.6599	25.5685	25.7763	25.5753	25.7115	25.7065
	0.956743	-0.194859	O00273;K7ERT1	O00273	DNA fragmentation factor subunit alpha	DFFA	1672					5	5	5	19.9	19.9	19.9	36.521	9.9113	1129100000	18	17	24.8691	25.151	25.1664	24.9797	25.0892	25.1342	25.4148	25.3074
	0.0955119	0.0446024	O00291	O00291	Huntingtin-interacting protein 1	HIP1	1673					6	6	5	9	9	7.6	116.22	43.552	659190000	57	16	24.8616	25.2623	25.5569	25.0725	24.9467	25.2334	25.0641	25.3306
	1.14215	-0.149367	O00299	O00299	Chloride intracellular channel protein 1	CLIC1	1674					14	14	14	68	68	68	26.922	114.3	33525000000	15	151	29.4287	29.2056	29.2638	29.3401	29.5159	29.4089	29.3492	29.5616
+	3.36551	0.712312	O00399;E5RFU3;E5RK00	O00399	Dynactin subunit 6	DCTN6	1676					3	3	3	18.4	18.4	18.4	20.747	4.1546	771520000	7	21	25.7059	25.6882	25.3127	25.6553	24.7607	24.9352	24.8771	24.9399
	0.823524	-0.132542	O00401	O00401	Neural Wiskott-Aldrich syndrome protein	WASL	1677					6	6	6	22.2	22.2	22.2	54.826	23.682	747080000	23	27	25.0637	25.1785	25.0458	25.2696	25.4402	25.282	25.1725	25.1931
	2.45932	-0.217758	O00410;H0Y8C6;E7ETV3;E7EWK4;E7EX05;E7EV12;E7EQT5;C9JQT6;C9JZD8;E7ETV8;E7ESZ1;C9J875;O60518;C9JXE0	O00410;H0Y8C6	Importin-5	IPO5	1678					39	39	34	57.5	57.5	49	123.63	323.31	20630000000	56	413	27.1604	27.1249	27.1399	27.0696	27.2548	27.2894	27.4413	27.3803
	1.5406	-0.537934	O00411;K7EMH3	O00411	DNA-directed RNA polymerase, mitochondrial	POLRMT	1679					8	8	8	7.5	7.5	7.5	138.62	10.695	638920000	59	23	25.0467	24.3873	24.6559	24.2704	25.19	25.2559	24.9104	25.1559
	0.61532	0.16624	O00425;F8WD15	O00425	Insulin-like growth factor 2 mRNA-binding protein 3	IGF2BP3	1680					15	13	13	31.1	27.1	27.1	63.704	44.898	2858700000	29	80	26.2549	25.743	26.167	26.2293	25.8673	25.8516	26.0462	25.9641
	0.712922	-0.100728	O00429;F8VZ52;B4DPZ9;F8W1W3;F8VUJ9;B4DDQ3;H0YHY4;F8VR28;F8VYL3;H0YI79	O00429	Dynamin-1-like protein	DNM1L	1681					30	30	30	54.2	54.2	54.2	81.876	248.97	11078000000	50	253	26.8415	26.9644	26.6782	26.8283	27.0292	26.9274	26.8616	26.8971
	0.194763	0.168775	O00442;A6NIC1	O00442	RNA 3-terminal phosphate cyclase	RTCA	1682					3	3	3	12.3	12.3	12.3	39.336	7.4293	243920000	19	11	24.3705	24.5419	24.1377	24.4385	23.2618	24.3025	24.4526	24.7965
	0.690526	0.336256	O00443;A0A0C4DGF9;E9PPP3	O00443;A0A0C4DGF9	Phosphatidylinositol 4-phosphate 3-kinase C2 domain-containing subunit alpha	PIK3C2A	1683					4	4	4	2.3	2.3	2.3	190.68	5.1447	123360000	94	22	23.2116	22.8486	23.6581	22.6667	22.5392	22.8786	22.9226	22.6995
	0.119515	-0.0511208	O00461;F8W785	O00461;F8W785	Golgi integral membrane protein 4	GOLIM4	1684					10	10	10	18.8	18.8	18.8	81.879	31.707	1117000000	39	64	25.1653	25.2447	24.9223	25.0935	25.4423	25.3481	25.0154	24.8245
	0.0244533	-0.0132079	O00468;A0A087X208;A0A494C1I6	O00468;A0A087X208;A0A494C1I6	Agrin;Agrin N-terminal 110 kDa subunit;Agrin C-terminal 110 kDa subunit;Agrin C-terminal 90 kDa fragment;Agrin C-terminal 22 kDa fragment	AGRN	1685					11	11	1	7.7	7.7	1.1	217.32	20.851	558110000	90	40	23.9045	24.3812	23.9208	24.3263	24.0582	23.8141	24.3038	24.4095
	1.38268	-0.211988	O00483	O00483	Cytochrome c oxidase subunit NDUFA4	NDUFA4	1686					4	4	4	46.9	46.9	46.9	9.3697	21.239	6603900000	6	30	27.8883	27.863	28.0987	27.9631	28.1027	28.353	28.1055	28.0998
	0.664244	0.0958815	O00487	O00487	26S proteasome non-ATPase regulatory subunit 14	PSMD14	1687					10	10	10	43.5	43.5	43.5	34.577	63.069	5052700000	15	94	26.9634	27.0474	26.8488	26.7844	26.7197	26.7964	26.8539	26.8905
+	2.51489	-0.704225	O00499	O00499	Myc box-dependent-interacting protein 1	BIN1	1689					7	7	7	21.1	21.1	21.1	64.699	58.597	643860000	28	29	24.4932	24.2061	23.9984	23.8569	24.9668	24.8833	24.7754	24.746
	0.574385	0.226738	O00505;H0Y4S9	O00505	Importin subunit alpha-4	KPNA3	1690					9	6	6	27.8	20.3	20.3	57.81	58.05	1881100000	17	53	25.9172	26.0125	26.5223	26.0643	25.8339	26.0524	26.1472	25.5759
	0.182371	-0.0289402	O00560	O00560	Syntenin-1	SDCBP	1692					10	10	1	61.1	61.1	6	32.444	185.09	7004300000	11	66	27.8304	27.7687	27.7959	27.9223	27.7239	27.9048	27.8366	27.9678
	0.838654	-0.123455	O00566;U3KQ48	O00566;U3KQ48	U3 small nucleolar ribonucleoprotein protein MPP10	MPHOSPH10	1693					5	5	5	12	12	12	78.863	28.214	2093700000	28	50	26.0722	26.2833	26.0612	25.9884	26.3305	26.2056	26.2097	26.1532
	0.760269	-0.0735197	O00567;A0A494C128;Q5JXT2;H0YDU4;H0Y653	O00567;A0A494C128;Q5JXT2	Nucleolar protein 56	NOP56	1694					18	18	18	41.2	41.2	41.2	66.049	67.615	6132800000	31	156	26.2283	26.3215	26.2196	26.3623	26.4196	26.3121	26.4031	26.2908
	1.21407	-0.815657	O00622	O00622	Protein CYR61	CYR61	1696					2	2	2	5.8	5.8	5.8	42.026	3.2785	107870000	26	7	21.8571	22.4943	23.4087	22.4498	22.9591	23.3468	23.4882	23.6784
	3.02515	-0.291208	O00625	O00625	Pirin	PIR	1697					13	13	13	61.4	61.4	61.4	32.113	192.41	6659100000	15	152	27.0892	27.0691	27.1595	26.9559	27.312	27.3779	27.3319	27.4168
	0.216831	-0.360287	O00743;Q5T1S7	O00743	Serine/threonine-protein phosphatase 6 catalytic subunit;Serine/threonine-protein phosphatase 6 catalytic subunit, N-terminally processed	PPP6C	1699					5	5	5	23	23	23	35.144	2.3738	238850000	16	4	22.9762	22.7405	23.7345	22.5061	24.1167	22.609	24.6214	22.0512
	0.267613	-0.118107	O00762;A0A087WVK1;K4DI81;A0A0A0MSE8	O00762	Ubiquitin-conjugating enzyme E2 C	UBE2C	1700					5	5	5	39.7	39.7	39.7	19.652	12.059	684700000	11	17	24.7233	25.4405	25.1375	25.1514	24.9375	25.2278	25.3306	25.4293
	0.819587	0.0939183	O00764;F2Z2Y4;A8MV33	O00764;F2Z2Y4	Pyridoxal kinase	PDXK	1701					16	16	16	79.2	79.2	79.2	35.102	323.31	21938000000	14	211	28.7142	28.8385	28.7097	28.7268	28.6275	28.5645	28.6308	28.7908
	1.21977	0.310096	O00767	O00767	Acyl-CoA desaturase	SCD	1702					5	5	5	21.2	21.2	21.2	41.522	69.326	3483900000	13	75	27.0205	27.0903	26.7017	27.1485	26.4864	26.9033	26.5973	26.7336
	0.646889	-0.200965	O14497;H0Y488;A0A1B0GTU5;A0A087WUV6;H0YCU6;A0A1B0GTI6;A0A1B0GV63;A0A1B0GWJ2;A0A1B0GTJ8;A0A1B0GVK1;H0Y7H8;A0A3F2YNW7;A0A6Q8NVI4;Q8NFD5	O14497;H0Y488;A0A1B0GTU5	AT-rich interactive domain-containing protein 1A	ARID1A	1703					10	10	10	5.8	5.8	5.8	242.04	13.638	327560000	82	15	23.6458	23.5286	24.0179	23.948	24.178	23.846	23.8153	24.1049
	0.442558	0.113217	O14519;O75956;F5GZF0;E9PKR4	O14519;O75956;F5GZF0;E9PKR4	Cyclin-dependent kinase 2-associated protein 1;Cyclin-dependent kinase 2-associated protein 2	CDK2AP1;CDK2AP2	1704					2	2	2	15.7	15.7	15.7	12.365	5.4296	722680000	4	19	25.2485	25.6345	25.5837	25.5902	25.2738	25.3343	25.6034	25.3926
	0.692994	-0.13518	O14530;F8WCJ3;B8ZZX4;F8WBV5;G3XAJ4	O14530;F8WCJ3;B8ZZX4	Thioredoxin domain-containing protein 9	TXNDC9	1705					5	5	5	21.7	21.7	21.7	26.534	26.582	936730000	13	25	24.9577	24.7959	24.9413	25.0489	25.0581	25.2747	25.0613	24.8903
	1.02869	-1.64454	O14548;E5RJZ1;H0YBD2;E5RFH8	O14548;E5RJZ1;H0YBD2	Cytochrome c oxidase subunit 7A-related protein, mitochondrial	COX7A2L	1707					5	5	5	55.3	55.3	55.3	12.615	31.07	1238000000	7	22	23.4678	26.1376	23.2742	26.2975	26.5156	26.3956	26.2707	26.5733
	0.497893	0.183888	O14561;H3BNK3;I3L505	O14561;H3BNK3	Acyl carrier protein, mitochondrial;Acyl carrier protein	NDUFAB1	1708					3	3	3	15.4	15.4	15.4	17.417	8.8419	2372000000	7	46	26.8215	26.885	27.0996	27.0586	26.4856	26.9204	26.5714	27.1517
	2.57718	0.179929	O14579;M0QXB4;M0R061	O14579;M0QXB4;M0R061	Coatomer subunit epsilon	COPE	1709					13	13	13	59.4	59.4	59.4	34.482	136.39	9243400000	15	127	27.5873	27.6749	27.6314	27.559	27.3656	27.4937	27.4409	27.4326
	1.43161	0.283771	O14617;A0A2R8Y4J3;A0A087WYN6	O14617	AP-3 complex subunit delta-1	AP3D1	1710					13	13	5	14.2	14.2	5.6	130.16	74.467	2320500000	51	92	25.6874	25.9647	25.766	25.9105	25.7132	25.3176	25.6256	25.5371
+	2.82984	-1.72631	O14656;A0A494BZT7	O14656;A0A494BZT7	Torsin-1A	TOR1A	1712					6	6	6	19.6	19.6	19.6	37.808	17.478	658610000	17	14	23.2007	23.0578	24.3157	24.0446	25.3114	25.3982	25.4897	25.3247
	0.274689	0.0406394	O14657;H0Y7C8	O14657;H0Y7C8	Torsin-1B	TOR1B	1713					5	5	5	21.4	21.4	21.4	37.978	11.801	786570000	17	31	24.7189	24.7627	24.6232	24.6375	24.759	24.5094	24.652	24.6594
	1.75081	-0.244	O14672;H0YNC5	O14672	Disintegrin and metalloproteinase domain-containing protein 10	ADAM10	1714					14	14	14	23.9	23.9	23.9	84.141	109	4597800000	41	109	26.3024	26.5078	26.3373	26.4015	26.4509	26.6753	26.6986	26.7001
	0.636141	-1.09467	O14684	O14684	Prostaglandin E synthase	PTGES	1715					2	2	2	13.2	13.2	13.2	17.102	4.911	595950000	7	15	25.4154	25.4252	22.3625	25.7802	25.8875	26.3513	25.6671	25.456
	1.81491	-0.384084	O14737;K7EQA1;K7ESJ4;Q3HM38;X6R2P6	O14737;K7EQA1	Programmed cell death protein 5	PDCD5	1716					5	5	5	44.8	44.8	44.8	14.285	78.044	7978600000	10	47	28.0943	27.8805	28.2615	28.1612	28.6024	28.5699	28.2457	28.5158
	1.19795	-0.149326	O14744;G3V580;H0YJX6;G3V2L6;G3V5L5;G3V2X6;H0YJ77;C9JSX3;H0YJD3;G3V5T6;H7BZ44;G3V507;G3V2F5	O14744	Protein arginine N-methyltransferase 5;Protein arginine N-methyltransferase 5, N-terminally processed	PRMT5	1717					17	17	17	38.1	38.1	38.1	72.683	78.54	4961600000	32	111	26.3284	26.3401	26.3255	26.3075	26.3192	26.5277	26.4286	26.6234
	0.245729	-0.0494342	O14745;J3QRP6;J3QRA3	O14745	Na(+)/H(+) exchange regulatory cofactor NHE-RF1	SLC9A3R1	1718					14	14	14	46.9	46.9	46.9	38.868	39.872	2152800000	21	52	25.7793	25.8669	25.8896	25.544	25.8174	25.8274	25.8683	25.7643
	0.486472	0.507878	O14763	O14763	Tumor necrosis factor receptor superfamily member 10B	TNFRSF10B	1719					2	2	2	6.6	6.6	6.6	47.878	17.769	230580000	17	21	24.4127	24.0361	23.442	24.2291	24.5886	22.818	22.8517	23.8301
	1.63222	-0.230358	O14818;H0Y586;Q8TAA3;A0A087WYS6;F5GY34	O14818;H0Y586	Proteasome subunit alpha type-7	PSMA7	1721					12	12	12	60.5	60.5	60.5	27.887	186.01	27623000000	14	183	29.2457	29.0026	28.9829	29.128	29.3649	29.1969	29.3113	29.4076
	0.132006	0.036036	O14828	O14828	Secretory carrier-associated membrane protein 3	SCAMP3	1722					5	5	5	26.2	26.2	26.2	38.287	73.688	3506800000	10	59	26.7082	26.6799	26.601	26.5214	26.6235	26.7317	26.6929	26.3183
	0.816173	0.454602	O14880;Q5VV89;Q5VV87	O14880;Q5VV89;Q5VV87	Microsomal glutathione S-transferase 3	MGST3	1723					3	3	3	40.8	40.8	40.8	16.516	60.317	1751500000	7	23	26.0614	27.088	26.5349	27.0282	26.0105	26.6143	26.2343	26.035
	0.964512	-0.243057	O14908;K7EM11;K7ELJ2;K7EIT0;K7ESN1;A0A2R8Y651;Q8TF64	O14908	PDZ domain-containing protein GIPC1	GIPC1	1725					10	10	10	47.1	47.1	47.1	36.049	123.3	3275200000	15	81	26.0805	26.3672	26.0642	25.9568	26.2553	26.1945	26.3687	26.6224
	2.26823	-0.227782	O14929;F8WEW1;F8W9G7	O14929	Histone acetyltransferase type B catalytic subunit	HAT1	1727					12	12	12	42.7	42.7	42.7	49.54	110.79	4810700000	16	100	26.7004	26.8148	26.6273	26.7265	26.871	26.9483	27.0457	26.9151
	1.0661	-1.54367	O14933;E9PQT7;E9PKW8	O14933;E9PQT7	Ubiquitin/ISG15-conjugating enzyme E2 L6	UBE2L6	1728					3	3	3	38.6	38.6	38.6	17.769	11.252	394320000	7	23	25.4355	22.7319	23.7375	22.242	24.5638	25.783	25.1231	24.8516
	0.287092	-0.121959	O14949	O14949	Cytochrome b-c1 complex subunit 8	UQCRQ	1730					3	3	3	34.1	34.1	34.1	9.9062	60.02	4074300000	6	27	27.2725	27.9009	27.2214	27.7692	27.6591	27.5634	27.7616	27.6676
	0.84523	-1.55273	O14967;D6RAZ4	O14967;D6RAZ4	Calmegin	CLGN	1732					2	2	2	5.2	5.2	5.2	70.038	3.1707	721240000	34	10	26.1482	23.3116	22.0574	23.9192	25.3455	25.5413	26.2072	24.5532
	1.30535	-0.198179	O14974;F8VZN8;H0YHI8;A0A3B3ISH4;H0YIS4;H0YIS3;H0YIM2;F8VW28;A0A0U1RQZ1;H0YHL8;H0YIL7	O14974;F8VZN8;H0YHI8;A0A3B3ISH4	Protein phosphatase 1 regulatory subunit 12A	PPP1R12A	1733					16	16	16	16.5	16.5	16.5	115.28	74.471	2685400000	48	74	25.6281	25.3862	25.5957	25.339	25.7651	25.7192	25.645	25.6125
	0.516618	0.24484	O14975;G3V1R7	O14975;G3V1R7	Very long-chain acyl-CoA synthetase	SLC27A2	1734					14	14	14	33.4	33.4	33.4	70.311	81.349	2043700000	29	70	25.4301	26.4108	25.8831	25.791	25.6094	25.4195	25.713	25.7937
	1.21813	-0.22314	O14980;A0A7I2V461;A0A7I2V2Y6;A0A7I2V2S3;A0A7I2V3W6;A0A7I2V2H0;A0A7I2YQV4;A0A7I2V3P3;A0A7I2V6B9;A0A7I2V488;A0A7I2V3N0;A0A7I2YQX3;A0A7I2V4A3;C9JKM9;C9J673;A0A7I2V2C5;A0A7I2V3J1;A0A7I2YQP1;A0A7P0Z4B7;F8WF71;C9IYM2;A0A7I2V396	O14980;A0A7I2V461;A0A7I2V2Y6;A0A7I2V2S3;A0A7I2V3W6;A0A7I2V2H0;A0A7I2YQV4;A0A7I2V3P3;A0A7I2V6B9;A0A7I2V488;A0A7I2V3N0;A0A7I2YQX3;A0A7I2V4A3	Exportin-1	XPO1	1736					31	31	31	35.4	35.4	35.4	123.38	214.62	15966000000	53	262	27.93	27.9395	27.8449	28.2092	28.0554	28.3104	28.2642	28.1863
+	1.97078	0.96327	O15014;A2RRB2;B3KPE6;A0A0C4DGB8;Q9ULD9	O15014	Zinc finger protein 609	ZNF609	1737					5	5	5	3.7	3.7	3.7	151.19	8.4357	212900000	55	10	24.1777	24.6616	23.8483	23.6709	23.4207	23.3389	22.9305	22.8153
	0.177275	0.0321927	O15027;F1T0I1;A0A3F2YNX0;A0A3F2YNZ0;X6RGP5;A0A0C4DH09;Q8N9G1	O15027;F1T0I1;A0A3F2YNX0;A0A3F2YNZ0	Protein transport protein Sec16A	SEC16A	1738					29	29	29	21.1	21.1	21.1	251.89	138.99	4254500000	86	155	25.5925	25.8213	25.8127	25.6026	25.6724	25.6776	25.5986	25.7517
	0.0535482	-0.0225382	O15031;A6QRG9;E2PU09;A6QRH1;H0YAM9;F5H3A2;B4DHQ7;O60486;Q9Y4D7	O15031	Plexin-B2	PLXNB2	1739					18	18	18	15.3	15.3	15.3	205.12	151.93	3976500000	90	98	26.8467	26.886	26.6411	26.8582	26.4954	26.7221	27.0889	27.0157
	2.35095	-0.277028	O15042;E7ET15;E7EW00;H0Y8D9;C9J5L1;U3KPT1;C9JDJ7;H7C4V2	O15042;E7ET15;E7EW00;H0Y8D9	U2 snRNP-associated SURP motif-containing protein	U2SURP	1740					16	16	16	18.7	18.7	18.7	118.29	83.735	5828900000	39	118	27.2659	27.3326	27.1015	27.1928	27.4104	27.4643	27.5516	27.5747
	0.0308322	0.028626	O15066;A0A0A0MRS8;Q9P2E2	O15066	Kinesin-like protein KIF3B;Kinesin-like protein KIF3B, N-terminally processed	KIF3B	1741					4	2	1	6.7	3.5	1.2	85.124	3.6	105890000	41	11	23.3958	23.0986	24.0249	23.0556	22.9049	23.8265	23.0495	23.6796
	3.51074	-0.20522	O15067;H0YGH1;J3QSG0;J3QSH6;J3KTL4;J3KTQ5;J3QL39;J3KT98	O15067	Phosphoribosylformylglycinamidine synthase	PFAS	1742					32	32	32	37.8	37.8	37.8	144.73	323.31	19438000000	58	316	27.3817	27.4166	27.386	27.4106	27.6657	27.5783	27.6256	27.5462
+	1.71648	-1.42929	O15084;B4DIW9	O15084;B4DIW9	Serine/threonine-protein phosphatase 6 regulatory ankyrin repeat subunit A	ANKRD28	1743					6	6	5	7.6	7.6	6.6	112.96	13.173	296630000	36	12	23.6151	22.4891	22.6903	23.3513	25.4343	24.4316	24.3173	23.6797
	0.269888	-0.14792	O15091;A0A0A0MTQ0	O15091;A0A0A0MTQ0	Mitochondrial ribonuclease P protein 3	KIAA0391	1744					5	5	5	12	12	12	67.315	12.033	173580000	33	15	22.9227	23.6384	23.5032	22.9581	23.7765	23.3142	23.3588	23.1647
+	3.51924	-1.30397	O15111	O15111	Inhibitor of nuclear factor kappa-B kinase subunit alpha	CHUK	1745					3	3	3	5.6	5.6	5.6	84.639	3.0301	165880000	39	7	22.7029	22.2856	23.1295	22.5942	23.944	24.0062	24.005	23.9728
	0.285741	-0.417822	O15116;E5RJ47;E5RH18	O15116;E5RJ47;E5RH18	U6 snRNA-associated Sm-like protein LSm1	LSM1	1746					2	2	2	17.3	17.3	17.3	15.179	12.901	602120000	6	24	24.6833	23.0183	25.5151	25.6565	25.0984	25.0534	25.0951	25.2977
	1.16864	-0.388518	O15118;K7EQ23	O15118;K7EQ23	Niemann-Pick C1 protein	NPC1	1747					8	8	8	8.1	8.1	8.1	142.17	51.558	1177700000	45	38	24.8422	25.5965	25.0104	25.1063	25.4961	25.4252	25.7183	25.4698
	0.530026	-0.50097	O15121	O15121	Sphingolipid delta(4)-desaturase DES1	DEGS1	1748					1	1	1	5.3	5.3	5.3	37.866	1.9071	152920000	10	5	23.9661	23.262	23.4372	22.8446	23.2969	23.1834	24.4605	24.5729
	0.061358	0.218514	O15126;A0A087WXB0;A0A087WU14;A0A087WZA6;A0A087WTX8	O15126;A0A087WXB0;A0A087WU14	Secretory carrier-associated membrane protein 1	SCAMP1	1749					5	5	5	15.4	15.4	15.4	37.92	20.563	971290000	15	17	26.352	26.7171	26.5836	22.4502	23.1122	25.9596	26.0445	26.1126
	0.78146	0.206325	O15127;H3BV04;H3BN93;H3BUB6;H3BPL9	O15127;H3BV04;H3BN93;H3BUB6;H3BPL9	Secretory carrier-associated membrane protein 2	SCAMP2	1750					3	3	3	10.3	10.3	10.3	36.648	160.55	1856400000	8	29	26.2671	26.5179	26.2135	26.1821	26.2458	25.776	26.1801	26.1534
	2.38132	0.372604	O15143;C9JEY1;C9K057;C9JTT6;C9JBJ7;F8VXW2;C9JM51;F8WEB3	O15143;C9JEY1;C9K057	Actin-related protein 2/3 complex subunit 1B	ARPC1B	1751					13	13	4	46	46	15.1	40.949	117.51	4554900000	18	70	27.1731	27.088	27.0201	27.2115	26.7457	26.8934	26.5579	26.8053
	0.684053	-0.121968	O15144;C9JTV5;G5E9J0;H7C3F9;G5E9S7	O15144	Actin-related protein 2/3 complex subunit 2	ARPC2	1752					16	16	16	62.3	62.3	62.3	34.333	145.03	12807000000	20	147	27.8779	27.8117	27.5454	27.8093	27.7775	27.8568	27.906	27.9918
	0.441275	0.0649204	O15145;C9JZD1;F8VR50	O15145	Actin-related protein 2/3 complex subunit 3	ARPC3	1753					7	7	7	34.8	34.8	34.8	20.546	41.326	5224300000	10	85	26.352	26.5997	26.5583	26.5734	26.4284	26.4827	26.3802	26.5324
	0.108043	-0.0198174	O15160;A0A2R8YEY5;A0A2R8YEZ4;A0A2R8Y5D3;E7EQB9;D6RDJ3;H0Y723;A0A2R8Y8D6	O15160;A0A2R8YEY5;A0A2R8YEZ4;A0A2R8Y5D3;E7EQB9	DNA-directed RNA polymerases I and III subunit RPAC1	POLR1C	1754					7	7	7	30.3	30.3	30.3	39.249	19.19	1312500000	17	38	25.157	25.4161	25.3384	25.3003	25.2986	25.3125	25.436	25.244
	0.649652	0.58952	O15164	O15164	Transcription intermediary factor 1-alpha	TRIM24	1755					4	4	3	3.8	3.8	3	116.83	4.2479	44463000	58	6	22.4017	23.4485	23.6624	23.3364	23.612	22.4283	22.2819	22.1686
	1.84766	0.332972	O15173;U3KQM0;U3KPU8	O15173	Membrane-associated progesterone receptor component 2	PGRMC2	1756					10	9	9	45.3	41.3	41.3	23.818	69.164	4317000000	9	77	27.2085	27.1076	27.3679	27.1282	26.6471	26.9111	26.9162	27.006
	1.58567	-0.330662	O15212;A2AB88	O15212;A2AB88	Prefoldin subunit 6	PFDN6	1757					4	4	4	32.6	32.6	32.6	14.582	51.82	4259100000	8	41	27.8048	27.4316	27.8888	27.8324	28.0796	28.01	28.0034	28.1871
	0.267135	-0.240534	O15226	O15226	NF-kappa-B-repressing factor	NKRF	1758					11	11	11	16.4	16.4	16.4	77.672	19.207	748180000	40	38	25.0368	23.6499	25.2159	24.5394	25.123	24.9704	24.7235	24.5873
	0.0871023	-0.0374212	O15230;A0A087WYH7;A0A075B783;A0A0A0MSA0;Q16787	O15230	Laminin subunit alpha-5	LAMA5	1759					23	23	23	9	9	9	399.73	59.768	1903900000	180	97	24.818	24.9841	24.5406	24.8935	24.4995	24.8494	25.0511	24.9859
	0.537846	0.0977235	O15231;H0Y704;H7BZT5;H7C1R1	O15231;H0Y704;H7BZT5	Zinc finger protein 185	ZNF185	1760					10	10	10	21.3	21.3	21.3	73.525	37.073	1074600000	41	31	25.5241	25.418	25.5119	25.4735	25.2471	25.3383	25.6181	25.333
	0.559301	0.29098	O15234;J3KSY7	O15234;J3KSY7	Protein CASC3	CASC3	1761					2	2	2	3.4	3.4	3.4	76.277	2.3568	113950000	27	8	23.1663	23.2966	23.225	23.3659	22.5891	22.5871	23.5733	23.1403
	0.0340229	0.00732994	O15235	O15235	28S ribosomal protein S12, mitochondrial	MRPS12	1762					3	3	3	32.6	32.6	32.6	15.173	18.904	1285000000	7	27	25.5831	25.6265	25.7176	25.8624	25.6676	25.5933	25.7073	25.792
	0.174882	-0.527494	O15254	O15254	Peroxisomal acyl-coenzyme A oxidase 3	ACOX3	1763					2	2	2	4.3	4.3	4.3	77.628	1.7267	2543400000	42	11	28.7173	23.5753	27.8074	28.0649	27.4875	27.4734	27.6204	27.6937
	0.670702	0.902009	O15258;Q5T092;A0A0A0MR06;Q5T091;Q5T093	O15258;Q5T092;A0A0A0MR06;Q5T091;Q5T093	Protein RER1	RER1	1764					5	5	5	24.5	24.5	24.5	22.958	11.35	1101300000	8	24	25.7174	26.0068	26.1345	26.2778	23.2284	25.6103	25.8102	25.8796
	0.869055	-0.369951	Q5T8U5;O15260;B7Z1G8	Q5T8U5;O15260;B7Z1G8	Surfeit locus protein 4	SURF4	1765					6	6	6	39.8	39.8	39.8	21.127	30.127	2568400000	9	47	26.6178	26.806	26.9243	26.7608	27.7425	27.0016	26.8066	27.038
	0.818398	0.899827	O15269	O15269	Serine palmitoyltransferase 1	SPTLC1	1766					5	5	5	13.5	13.5	13.5	52.743	5.4687	717650000	21	18	25.5432	25.8179	25.4965	25.5195	24.3251	25.4689	25.6586	23.3253
	0.943914	0.500663	O15270	O15270	Serine palmitoyltransferase 2	SPTLC2	1767					4	4	4	8.7	8.7	8.7	62.924	9.3189	47761000	34	6	24.3584	23.8312	23.4062	23.5968	23.7576	22.977	23.3786	23.0768
+	3.41896	-0.390678	O15294;C9JZL3	O15294	UDP-N-acetylglucosamine--peptide N-acetylglucosaminyltransferase 110 kDa subunit	OGT	1768					22	22	22	29.2	29.2	29.2	116.92	112.03	4042000000	50	131	25.8446	25.6838	25.7645	25.665	26.0705	26.1098	26.1051	26.2352
	0.480972	-0.0898867	O15305;H3BV55;H3BRM0;A0A804HKA7;H3BPH4;H3BR08;H3BM92;H3BV34;H3BT06;H3BNY9;Q92871	O15305;H3BV55;H3BRM0;A0A804HKA7;H3BPH4	Phosphomannomutase 2;Phosphomannomutase	PMM2	1769					10	10	10	36.6	36.6	36.6	28.082	26.93	4045000000	16	72	26.5003	26.446	26.4129	26.3593	26.7132	26.4159	26.3657	26.5833
	2.72874	-0.210035	O15355	O15355	Protein phosphatase 1G	PPM1G	1770					14	14	14	34.4	34.4	34.4	59.271	323.31	9926800000	25	142	27.3724	27.3583	27.4411	27.2545	27.5941	27.5514	27.5681	27.5527
	2.4107	-0.397807	O15371;B0QYA5;B0QYA4;B0QYA6;B0QYA8	O15371	Eukaryotic translation initiation factor 3 subunit D	EIF3D	1771					16	16	16	36.5	36.5	36.5	63.972	90.251	5608500000	25	92	27.3154	27.4254	27.4979	27.6818	27.8109	27.9804	27.9097	27.8108
	1.19014	0.922493	O15381;C9JP83;C9J6P7;E9PH71;E7EWK7	O15381;C9JP83;C9J6P7	Nuclear valosin-containing protein-like	NVL	1772					5	5	5	8.1	8.1	8.1	95.05	4.4088	572050000	47	7	23.2711	22.7716	24.0782	24.2401	22.0422	22.8055	22.7746	23.0487
	0.0619443	0.0206342	O15382;B3KSI3;M0QXF9;M0QZ10;M0QZP4;M0R2K7	O15382;B3KSI3;M0QXF9;M0QZ10;M0QZP4	Branched-chain-amino-acid aminotransferase, mitochondrial;Branched-chain-amino-acid aminotransferase	BCAT2	1773					12	12	12	46.7	46.7	46.7	44.287	109.56	2579800000	19	83	26.1219	25.8965	26.0769	25.8831	25.8404	25.7838	26.2252	26.0465
	0.0711428	0.225541	O15400	O15400	Syntaxin-7	STX7	1774					4	4	4	19.5	19.5	19.5	29.815	4.7747	767550000	11	9	25.2952	23.0792	25.6652	25.5781	25.561	25.7506	25.5828	21.821
	0.208561	0.0314264	O15438;H0Y8Q6	O15438	Canalicular multispecific organic anion transporter 2	ABCC3	1775					13	13	13	13.3	13.3	13.3	169.34	41.781	2197500000	62	78	25.421	25.3781	25.256	25.4011	25.4524	25.3291	25.2222	25.3268
	0.0442371	0.0214849	O15439;A0A2R8Y6V8;A0A2R8YDC1	O15439;A0A2R8Y6V8;A0A2R8YDC1	Multidrug resistance-associated protein 4	ABCC4	1776					9	9	9	12.2	12.2	12.2	149.52	67.96	1181100000	71	52	25.0364	25.7701	25.4411	25.6591	25.3978	25.5973	25.379	25.4466
	0.460626	0.523352	O15446	O15446	DNA-directed RNA polymerase I subunit RPA34	CD3EAP	1777					5	5	5	13.5	13.5	13.5	54.985	24.435	768670000	20	26	25.6423	25.5277	25.3338	25.4119	25.7296	23.4632	25.3788	25.2507
	0.0496116	0.131147	O15460;E7ENX0;E7EPI9	O15460	Prolyl 4-hydroxylase subunit alpha-2	P4HA2	1778					7	7	7	20.6	20.6	20.6	60.901	24.265	677590000	30	18	25.1283	25.363	22.4688	25.1702	24.7894	22.5723	25.2841	24.96
	1.45028	-0.153716	O15511;B1ALC0	O15511;B1ALC0	Actin-related protein 2/3 complex subunit 5	ARPC5	1779					7	7	7	58.3	58.3	58.3	16.32	88.304	6429600000	10	66	27.7481	27.8651	27.7542	27.7485	27.9691	27.7864	27.996	27.9793
	0.0203701	-0.0368905	O15514;E9PB93;E9PHV4	O15514;E9PB93;E9PHV4	DNA-directed RNA polymerase II subunit RPB4	POLR2D	1780					4	4	4	44.4	44.4	44.4	16.311	37.849	567650000	9	32	24.9538	24.8877	22.4524	24.6933	23.9642	24.1575	24.4625	24.5507
	2.94565	-0.331569	O43143	O43143	Pre-mRNA-splicing factor ATP-dependent RNA helicase DHX15	DHX15	1782					31	31	30	43.4	43.4	42.3	90.932	135.71	12071000000	39	227	27.3297	27.3587	27.2928	27.5091	27.7586	27.6319	27.7556	27.6705
+	3.09989	-1.21263	O43149	O43149	Zinc finger ZZ-type and EF-hand domain-containing protein 1	ZZEF1	1783					5	5	5	2.4	2.4	2.4	331.07	14.754	295080000	134	14	23.0747	22.8085	22.2952	22.9498	23.9032	24.018	24.2439	23.8135
+	3.41038	-0.836201	O43156	O43156	TELO2-interacting protein 1 homolog	TTI1	1784					3	3	3	4.1	4.1	4.1	122.07	4.8977	158270000	50	10	23.2904	23.2477	23.2541	23.2366	24.3529	24.1601	24.0703	23.7901
	0.384707	-0.115303	O43159;E9PPY3;E9PPP6	O43159;E9PPY3	Ribosomal RNA-processing protein 8	RRP8	1785					5	5	5	17.5	17.5	17.5	50.714	53.091	938930000	25	30	24.8165	25.021	24.9863	25.2917	25.0515	24.9908	25.1504	25.3839
	0.248132	-0.214423	O43164	O43164	E3 ubiquitin-protein ligase Praja-2	PJA2	1786					2	2	2	4.2	4.2	4.2	78.213	6.1392	79456000	26	14	23.2281	21.8405	22.3337	22.4128	22.9238	23.0688	22.5042	22.1758
	0.0707331	0.0155511	O43169;H3BUX2;D6RFH4;J3QR91	O43169;H3BUX2;D6RFH4	Cytochrome b5 type B	CYB5B	1788					6	6	6	78	78	78	16.694	186.76	26499000000	6	145	29.4597	29.713	29.392	29.5338	29.4454	29.5293	29.4555	29.6062
	0.890794	-0.151862	O43172	O43172	U4/U6 small nuclear ribonucleoprotein Prp4	PRPF4	1789					14	14	14	40.8	40.8	40.8	58.449	43.447	3922500000	30	96	25.9784	26.3201	26.0191	26.2481	26.2576	26.3368	26.2655	26.3131
	0.0598337	0.0285215	O43181;H0Y9M8	O43181	NADH dehydrogenase [ubiquinone] iron-sulfur protein 4, mitochondrial	NDUFS4	1790					3	3	3	19.4	19.4	19.4	20.108	9.9868	1720300000	9	22	26.3431	26.4256	26.4579	26.9565	26.6607	26.3166	26.3924	26.6994
	0.200803	0.0274925	O43237;B4E2E0;J3KRI4;J3KRZ2;H3BUM4	O43237	Cytoplasmic dynein 1 light intermediate chain 2	DYNC1LI2	1792					14	12	12	46.1	40.4	40.4	54.099	164.6	5803600000	26	113	27.0638	27.1332	26.8803	26.9978	26.9827	26.9797	27.0055	26.9972
	0.191543	0.025794	O43242;H0YGV8;F5H8K4	O43242	26S proteasome non-ATPase regulatory subunit 3	PSMD3	1793					23	23	23	47	47	47	60.977	249.69	12674000000	34	192	28.6922	28.7927	28.69	28.6851	28.697	28.7967	28.6919	28.5712
	0.870804	0.157283	O43252	O43252	Bifunctional 3-phosphoadenosine 5-phosphosulfate synthase 1;Sulfate adenylyltransferase;Adenylyl-sulfate kinase	PAPSS1	1794					9	9	9	26.4	26.4	26.4	70.832	84.626	2349800000	33	83	25.9815	26.2136	26.2257	26.2929	26.1856	25.9636	26.0308	25.9046
	0.0899255	0.0397768	O43264;F5H3C1	O43264	Centromere/kinetochore protein zw10 homolog	ZW10	1795					7	7	7	13.7	13.7	13.7	88.828	43.45	641980000	41	33	24.5949	24.7101	25.1255	25.0139	24.5499	24.9339	24.7895	25.012
	2.37656	-0.282293	O43290;E9PQI8	O43290	U4/U6.U5 tri-snRNP-associated protein 1	SART1	1797					18	18	18	30.1	30.1	30.1	90.254	77.569	12429000000	38	77	30.0049	29.8386	29.716	29.8536	30.1682	30.1726	30.0812	30.1203
	0.854522	0.316726	O43291;K7EM91;K7ESI5;K7EKQ0;K7ES27	O43291;K7EM91;K7ESI5;K7EKQ0	Kunitz-type protease inhibitor 2	SPINT2	1798					6	6	4	32.9	32.9	23.4	28.228	40.654	1705200000	13	36	26.4834	26.219	26.3673	26.0472	25.8945	26.3858	25.6086	25.9611
	0.449744	-0.5745	O43292;E9PPZ9;E9PLV6;E9PLG8;E9PQ31	O43292;E9PPZ9;E9PLV6	Glycosylphosphatidylinositol anchor attachment 1 protein	GPAA1	1799					4	4	4	7.9	7.9	7.9	67.622	6.6932	160690000	19	11	22.5684	22.8814	23.2589	23.837	24.9426	23.3194	22.5739	24.0078
	1.436	-0.123709	O43324;H0YAL7;D6RBD7;C9J1V9;H0YAH9;D6RCQ0	O43324;H0YAL7;D6RBD7;C9J1V9	Eukaryotic translation elongation factor 1 epsilon-1	EEF1E1;EEF1E1-BLOC1S5	1801					7	7	7	48.3	48.3	48.3	19.81	42.363	3536200000	12	58	26.7505	26.648	26.7614	26.668	26.8255	26.764	26.9326	26.8007
	0.712332	0.0523934	O43390;B4DT28;A0A6Q8PH31;A0A6Q8PH35;A0A6Q8PEX7;A0A6Q8PHG0;A0A286YEZ8	O43390;B4DT28;A0A6Q8PH31;A0A6Q8PH35;A0A6Q8PEX7	Heterogeneous nuclear ribonucleoprotein R	HNRNPR	1803					24	24	19	42.3	42.3	34.8	70.942	323.31	39518000000	34	357	29.0197	29.0623	29.0209	28.9869	29.0507	28.8967	28.9839	28.949
	0.405456	-0.71518	O43395	O43395	U4/U6 small nuclear ribonucleoprotein Prp3	PRPF3	1804					9	9	9	16.3	16.3	16.3	77.528	22.848	736430000	33	30	25.6857	25.8317	25.192	22.5163	25.3797	25.5826	25.6303	25.4938
	0.209425	-0.0431061	O43396;K7ER96;K7EML9;K7EPB7;K7EKG2;K7EME7	O43396;K7ER96	Thioredoxin-like protein 1	TXNL1	1805					14	14	14	52.9	52.9	52.9	32.251	222.14	8140500000	15	148	26.6588	26.5281	26.7231	26.5723	26.4661	26.7053	26.7898	26.6935
	2.69623	-0.177986	O43399;A0A087WYR3;A0A087WZ51	O43399;A0A087WYR3;A0A087WZ51	Tumor protein D54	TPD52L2	1806					12	12	12	71.8	71.8	71.8	22.237	187.14	6149300000	12	88	26.9532	26.9964	26.9133	26.883	27.092	27.099	27.185	27.0817
	0.341757	0.0621367	O43491;Q6R5J7;E9PMV8;Q6ZSX4;E9PN54	O43491	Band 4.1-like protein 2	EPB41L2	1808					21	20	0	31.6	30.4	0	112.59	98.628	3070000000	55	128	25.45	25.7612	25.5138	25.4297	25.4415	25.5135	25.4641	25.487
	0.124754	0.128516	O43504;R4GMU8;E9PLX3;A0A0C4DGV4	O43504;R4GMU8;E9PLX3;A0A0C4DGV4	Ragulator complex protein LAMTOR5	LAMTOR5	1809					4	4	4	70.3	70.3	70.3	9.6138	141.76	1511800000	5	24	26.0287	25.9259	25.7922	26.2146	26.169	24.7383	26.2671	26.2729
	1.61122	-0.18392	O43567;C9J8T4;C9JYN7;C9JRV0;F8WDJ5;C9J7B4;C9J383;C9IY58;C9JCY0;C9JU37;C9JYY4	O43567;C9J8T4;C9JYN7;C9JRV0;F8WDJ5;C9J7B4;C9J383;C9IY58;C9JCY0	E3 ubiquitin-protein ligase RNF13	RNF13	1810					4	4	4	11.8	11.8	11.8	42.813	7.9514	1069600000	14	32	25.9013	25.8283	25.7338	25.8104	25.9373	25.9682	25.9494	26.1545
	1.56393	-0.202915	O43570;B3KUB4	O43570;B3KUB4	Carbonic anhydrase 12	CA12	1811					9	9	9	36.7	36.7	36.7	39.45	107.83	21000000000	12	131	28.9962	28.8235	28.9209	28.9827	29.1911	29.2685	29.0271	29.0483
	0.589148	-0.792534	O43592;F8WDU6;F5GYW6	O43592;F8WDU6	Exportin-T	XPOT	1812					3	3	3	3.7	3.7	3.7	109.96	4.4336	259450000	45	7	22.4888	22.6326	24.2404	22.4568	24.5236	23.4675	22.5526	24.4451
	0.845072	-0.0890827	O43615;M0QXU7;M0R301;M0R124;M0QXM9	O43615;M0QXU7	Mitochondrial import inner membrane translocase subunit TIM44	TIMM44	1813					11	11	11	29	29	29	51.355	50.037	2186500000	29	65	25.4321	25.638	25.5705	25.5365	25.6888	25.5837	25.5763	25.6846
	0.926471	-1.21733	O43617;A0A087WWM0;A6NKE1;A0A087WYS5	O43617;A0A087WWM0;A6NKE1	Trafficking protein particle complex subunit 3	TRAPPC3	1814					5	5	5	25	25	25	20.274	11.202	592080000	9	21	22.9201	23.9153	22.6434	25.5291	25.283	25.0114	25.0072	24.5757
	0.761971	0.194048	O43633;M0R1L7;M0QXX8;M0R1T5	O43633;M0R1L7;M0QXX8;M0R1T5	Charged multivesicular body protein 2a	CHMP2A	1815					4	4	4	15.3	15.3	15.3	25.104	7.6727	967160000	9	29	25.5626	25.5032	25.293	25.7267	25.4469	25.3446	25.0736	25.4442
	0.585549	-0.212239	O43660;D6RA26;B7Z982;H0YAA2	O43660;D6RA26	Pleiotropic regulator 1	PLRG1	1816					8	8	8	29.4	29.4	29.4	57.193	30.805	1652700000	30	43	25.5018	25.9646	25.2044	25.431	25.5869	25.757	25.8803	25.7264
	1.05006	0.114296	O43663;H0YL53;H0YM42;H0YLA0;G3V3N7	O43663	Protein regulator of cytokinesis 1	PRC1	1817					9	9	9	19.5	19.5	19.5	71.606	35.204	1524700000	32	53	25.5819	25.5944	25.5552	25.5382	25.3425	25.5057	25.581	25.3833
	1.03873	-0.219592	O43665	O43665	Regulator of G-protein signaling 10	RGS10	1818					4	4	4	28.2	28.2	28.2	21.21	26.283	648650000	8	31	24.5369	24.353	24.5219	24.4906	24.671	24.428	24.7778	24.904
	0.715682	0.731569	O43676;C9JKQ2	O43676;C9JKQ2	NADH dehydrogenase [ubiquinone] 1 beta subcomplex subunit 3	NDUFB3	1819					2	2	2	21.4	21.4	21.4	11.402	4.8747	514430000	6	17	25.0546	25.3241	25.4005	24.8308	22.9823	24.8191	24.9972	24.8851
	0.201117	-0.0309711	O43678	O43678	NADH dehydrogenase [ubiquinone] 1 alpha subcomplex subunit 2	NDUFA2	1821					3	3	3	40.4	40.4	40.4	10.921	47.402	1279600000	6	19	26.0754	26.2542	26.316	26.3335	26.2447	26.2989	26.2544	26.305
	0.821894	-0.163263	O43681	O43681	ATPase ASNA1	ASNA1	1822					8	8	8	30.5	30.5	30.5	38.792	34.318	2069600000	15	49	25.8676	25.8369	25.7781	25.7307	26.2014	26.0338	25.8432	25.788
	0.723921	-0.0464716	O43707	O43707	Alpha-actinin-4	ACTN4	1823					67	67	1	78.4	78.4	1.8	104.85	323.31	522700000000	55	1522	30.9289	31.0284	30.961	30.9979	30.9622	31.0242	31.063	31.0527
	0.780229	-0.787307	O43709;H7C0G4;F8WD87;H7C170;F8WD67;E9PCQ7	O43709;H7C0G4	Probable 18S rRNA (guanine-N(7))-methyltransferase	WBSCR22	1824					4	4	4	17.1	17.1	17.1	31.88	13.995	1005100000	11	24	25.2088	25.3553	25.2571	23.3167	25.6184	25.6027	25.7581	25.308
	0.088481	0.0383215	O43719;Q5H919;Q5H918	O43719	HIV Tat-specific factor 1	HTATSF1	1826					9	9	9	16.2	16.2	16.2	85.852	63.485	2142000000	51	50	26.9839	26.5122	26.7	26.2801	26.5701	26.4661	26.5728	26.714
	1.38668	-0.413132	O43747;H3BNR4;H3BR36;H3BUN9;H3BN75;H3BS13;H3BV30;H3BRM7;H3BN71;B4DGE1;B3KNW1	O43747	AP-1 complex subunit gamma-1	AP1G1	1828					13	13	13	15.3	15.3	15.3	91.35	41.647	1902400000	35	57	25.411	25.6607	24.9488	25.31	25.7463	25.5765	25.8215	25.8388
	0.735357	0.271446	O43760;K7ELS8;K7ELD9;K7ENG9;K7EJ35	O43760;K7ELS8	Synaptogyrin-2	SYNGR2	1830					3	3	3	11.6	11.6	11.6	24.81	5.8032	1730900000	7	24	26.9309	27.1487	27.1677	27.1284	26.3101	26.9489	27.0544	26.9764
	1.40976	-0.133122	O43776;K7EIU7;K7EPK2;K7EQ35;K7EMQ6;K7EJ19	O43776	Asparagine--tRNA ligase, cytoplasmic	NARS	1831					18	18	18	38.5	38.5	38.5	62.942	190.68	8906000000	22	152	27.4342	27.443	27.2403	27.3976	27.4748	27.5617	27.5079	27.5032
	0.860331	-0.127909	O43809;H3BND3;H3BV41	O43809;H3BND3;H3BV41	Cleavage and polyadenylation specificity factor subunit 5	NUDT21	1833					11	11	11	55.9	55.9	55.9	26.227	74.007	5447400000	14	112	27.3485	27.137	27.3797	27.2278	27.5131	27.4532	27.3388	27.2996
	0.130471	0.0693374	O43813;E9PHS0;F8WDS9	O43813;E9PHS0	LanC-like protein 1	LANCL1	1834					9	9	9	28.1	28.1	28.1	45.283	24.589	1761300000	17	48	25.7524	25.8516	25.8165	26.5976	25.8773	25.9732	25.9589	25.9315
	0.961948	0.219181	O43815	O43815	Striatin	STRN	1835					13	13	13	26.2	26.2	26.2	86.131	28.428	1937000000	38	60	25.5533	25.2922	25.502	25.738	25.2159	25.3966	25.4495	25.1467
+	2.99227	-2.01567	O43818	O43818	U3 small nucleolar RNA-interacting protein 2	RRP9	1836					4	4	4	14.3	14.3	14.3	51.84	45.264	340650000	23	22	22.9693	21.9545	23.3622	23.3753	25.0641	24.9224	24.7698	24.9677
	1.17807	-0.231883	O43847;F5H7V1;G3V1R5;H0Y5G9	O43847;F5H7V1;G3V1R5	Nardilysin	NRD1	1838					16	16	16	15.5	15.5	15.5	131.7	48.735	2606700000	50	89	25.5072	25.7809	25.4522	25.6811	26.0026	25.885	25.7886	25.6729
	1.27825	-0.0975003	O43852;H0Y875	O43852	Calumenin	CALU	1839					13	13	13	56.5	56.5	56.5	37.106	323.31	21625000000	16	202	27.7889	27.8899	27.8657	27.7871	27.98	27.8421	27.962	27.9376
	0.68583	-0.218903	O43865;H0Y8B3;Q96HN2	O43865;H0Y8B3;Q96HN2	Putative adenosylhomocysteinase 2;Adenosylhomocysteinase;Putative adenosylhomocysteinase 3	AHCYL1;AHCYL2	1840					7	7	7	17.7	17.7	17.7	58.951	23.25	1466000000	26	39	26.3658	26.1709	25.6497	26.0061	26.311	26.2661	26.187	26.3042
	1.86614	0.354152	O43920	O43920	NADH dehydrogenase [ubiquinone] iron-sulfur protein 5	NDUFS5	1843					7	7	7	58.5	58.5	58.5	12.517	19.114	1869800000	6	37	26.3104	26.5522	26.4005	26.1544	26.1754	25.9309	25.9152	25.9795
	1.51701	-0.740807	O43929;C9JGH7;C9J2X8;Q53SE3;Q5THS9;CON__Q2YDI2;Q96NJ5	O43929	Origin recognition complex subunit 4	ORC4	1844					3	3	3	6.4	6.4	6.4	50.377	5.0877	189440000	25	11	22.8959	23.012	23.5261	24.0313	24.1037	24.204	24.0445	24.0763
	1.09408	-0.13882	O60216;E5RI01;E5RFZ5;E5RG18;E5RFV8;E5RIN7;E5RJW1;E5RJK5;A0A804HJ87;Q9H4I0	O60216	Double-strand-break repair protein rad21 homolog	RAD21	1845					12	12	12	26.9	26.9	26.9	71.689	32.923	998090000	26	44	24.6049	24.7207	24.7629	24.5353	24.7328	24.9091	24.795	24.7422
	0.910082	-0.0540857	O60218	O60218	Aldo-keto reductase family 1 member B10	AKR1B10	1846					25	25	13	80.1	80.1	46.5	36.019	323.31	859150000000	20	829	33.5449	33.5251	33.4218	33.547	33.5532	33.5569	33.5708	33.5742
	0.653238	-0.188446	O60256;E7EPA1;C9JJS3;C9K0K7;I3L0S1;C9JDU5;C9JDH0;I3L4G9;E7EW35;I3L331;I3L164	O60256;E7EPA1;C9JJS3;C9K0K7;I3L0S1	Phosphoribosyl pyrophosphate synthase-associated protein 2	PRPSAP2	1848					10	10	9	39.3	39.3	35.5	40.925	41.17	3349900000	23	67	26.4616	26.6231	26.3712	26.296	26.3043	26.5978	26.7553	26.8483
+	5.12858	-0.52676	O60264	O60264	SWI/SNF-related matrix-associated actin-dependent regulator of chromatin subfamily A member 5	SMARCA5	1849					19	19	10	19.8	19.8	11.3	121.9	134.18	2479300000	55	71	25.1614	25.2087	25.2611	25.2167	25.736	25.7951	25.6538	25.7699
	2.32606	-0.263393	O60271	O60271	C-Jun-amino-terminal kinase-interacting protein 4	SPAG9	1850					29	29	1	25.7	25.7	0.7	146.2	133.32	6803800000	67	165	25.9471	25.9879	25.9979	26.2116	26.2907	26.2796	26.3034	26.3243
	0.0142923	0.0108981	O60287	O60287	Nucleolar pre-ribosomal-associated protein 1	URB1	1851					4	4	4	2.9	2.9	2.9	254.39	8.8716	177280000	112	9	23.8492	23.917	22.87	23.7932	23.7841	23.4634	23.6372	23.5012
	0.715064	-0.517779	O60292;M0QX89	O60292	Signal-induced proliferation-associated 1-like protein 3	SIPA1L3	1852					12	12	12	12	12	12	194.61	26.658	837650000	92	28	24.8731	24.939	25.06	23.5649	24.9999	25.192	25.149	25.1673
	0.17141	0.065794	O60306;H0YH15	O60306	Intron-binding protein aquarius	AQR	1853					9	9	9	10	10	10	171.29	44.175	1121700000	68	58	24.3709	24.7737	24.4385	24.9387	24.606	24.7063	24.5344	24.412
	0.249712	-0.11309	O60341;R4GMQ1;R4GMP9	O60341;R4GMQ1	Lysine-specific histone demethylase 1A	KDM1A	1854					7	7	7	10.1	10.1	10.1	92.902	15.648	667750000	37	31	24.8765	24.696	24.5885	24.0773	24.6196	24.5055	24.7536	24.8119
	1.49061	-0.32397	O60343;A0A3B3IRT3	O60343;A0A3B3IRT3	TBC1 domain family member 4	TBC1D4	1855					2	2	2	2.3	2.3	2.3	146.56	10.217	307000000	63	30	23.6259	23.54	23.2515	23.7878	23.8164	23.8356	23.9595	23.8896
	1.17295	-0.670578	O60427;A0A0A0MR51;H7C2V0;F5H8G5;F5H3P6;F5H852;F5GWE3;F5H3U5;C9J425;F5H1Q7;F5H0Y2;F5H2H3;F5H5X5;C9JJB3;F5GYH4;H0YB97	O60427;A0A0A0MR51	Fatty acid desaturase 1	FADS1	1856					8	8	8	29.1	29.1	29.1	51.964	61.253	2009900000	22	37	26.1769	25.8718	26.0778	26.4996	27.5965	26.7141	26.3283	26.6695
+	3.3466	-0.774498	O60443;C9JSR4;H7BZJ0;H7C147	O60443;C9JSR4	Non-syndromic hearing impairment protein 5	DFNA5	1857					5	5	5	12.9	12.9	12.9	54.554	10.096	294400000	24	16	23.4124	23.2683	23.0938	23.1627	24.2619	23.9295	23.8624	23.9814
	0.76606	0.21217	O60488;A0A804HI36;D6RDA8;D6RF95;H0Y9A0	O60488;A0A804HI36	Long-chain-fatty-acid--CoA ligase 4	ACSL4	1859					8	6	6	19	14.6	14.6	79.187	35.183	2307700000	35	48	26.4275	26.373	26.379	26.1462	26.1685	25.981	26.4384	25.8891
	0.951427	-0.173707	O60493	O60493	Sorting nexin-3	SNX3	1860					9	7	7	62.3	52.5	52.5	18.762	17.201	1094800000	10	44	25.2389	25.1829	25.1757	25.0327	25.091	25.4643	25.382	25.3878
	0.892505	-0.147094	O60502;H7C3X0	O60502	Protein O-GlcNAcase	MGEA5	1861					13	13	13	18.9	18.9	18.9	102.91	31.352	1483200000	46	71	24.932	25.1506	24.9028	25.1106	25.0083	25.2525	25.2003	25.2234
	1.13678	0.224315	O60504;H0YB51;E5RJP2;H0YAZ3;E5RIA0	O60504;H0YB51;E5RJP2	Vinexin	SORBS3	1862					7	7	7	13.9	13.9	13.9	75.34	27.793	1142500000	38	36	25.142	25.5043	25.2688	25.4068	25.2585	25.1725	25.0213	24.9722
	0.797425	-0.0929446	O60506;A0A7I2V4Z0;A0A7I2YQN2;A0A7I2V2F2;A0A7I2V309;A0A7I2V346;B7Z645;A0A7I2V5Q6;F6UXX1;A0A7I2V4J0;A0A7I2V2F0	O60506;A0A7I2V4Z0;A0A7I2YQN2;A0A7I2V2F2;A0A7I2V309;A0A7I2V346;B7Z645;A0A7I2V5Q6	Heterogeneous nuclear ribonucleoprotein Q	SYNCRIP	1863					22	17	7	43.8	36.1	18	69.602	323.31	25683000000	32	214	28.1296	28.1078	28.2056	28.0855	28.1477	28.1321	28.3481	28.2724
	0.355038	0.125984	O60524;G3V5V3;G3V4D9;G3V547	O60524;G3V5V3	Nuclear export mediator factor NEMF	NEMF	1864					6	6	6	7	7	7	122.95	57.378	904390000	50	33	24.9235	24.7005	25.1274	25.2678	24.9827	24.9771	24.9456	24.6099
	0.909276	-0.851329	O60547	O60547	GDP-mannose 4,6 dehydratase	GMDS	1865					4	4	4	15.3	15.3	15.3	41.949	10.881	697030000	26	18	25.1482	24.4131	24.7504	23.0163	24.9742	25.0477	25.2987	25.4126
	0.69273	-0.364383	O60563	O60563	Cyclin-T1	CCNT1	1867					3	3	3	5.2	5.2	5.2	80.684	5.6429	582770000	26	19	24.9572	24.5835	25.1065	24.5977	25.3178	25.533	25.314	24.5376
	0.754445	0.175221	O60568;H7C2S8;H7C2V1;H7C0B8	O60568;H7C2S8	Procollagen-lysine,2-oxoglutarate 5-dioxygenase 3	PLOD3	1868					12	12	12	25.7	25.7	25.7	84.784	29.654	1288400000	43	47	24.9838	25.4033	25.1377	25.3105	24.9725	25.1402	24.8754	25.1463
	0.142297	-0.0657287	O60573;C9JEL3;B9A044;B8ZZ50;B8ZZL3;B4E1E4;B9A023	O60573;C9JEL3;B9A044;B8ZZ50	Eukaryotic translation initiation factor 4E type 2	EIF4E2	1869					5	5	5	32.2	32.2	32.2	28.362	23.325	1030800000	13	30	25.5928	25.4287	25.4028	24.8287	25.4886	25.4205	25.2351	25.3717
	1.21839	-0.116197	O60664;K7ERZ3;K7EL96;K7ER39	O60664;K7ERZ3	Perilipin-3	PLIN3	1871					15	15	15	48.8	48.8	48.8	47.074	323.31	11877000000	26	197	27.2663	27.2854	27.2274	27.1089	27.3852	27.2467	27.3553	27.3656
	0.114897	0.0223827	O60678	O60678	Protein arginine N-methyltransferase 3	PRMT3	1873					6	6	6	15.3	15.3	15.3	59.902	20.843	952600000	23	34	25.2189	25.4184	25.1951	25.2761	25.2552	25.2923	25.112	25.3595
	1.50207	-0.370407	O60684;Q5TFJ7;S4R3E5	O60684	Importin subunit alpha-7	KPNA6	1874					12	12	4	31.3	31.3	13.2	60.029	147.54	3409200000	23	66	26.5679	26.3472	26.0732	26.4463	26.4913	26.7814	26.8503	26.7932
	0.392873	0.0310354	O60701;E7ER83;E7ETF4;E7EV97;E7ER95;D6RHF4;E9PBD2	O60701	UDP-glucose 6-dehydrogenase	UGDH	1875					35	35	35	71.9	71.9	71.9	55.023	323.31	198920000000	28	538	30.4582	30.6071	30.4829	30.513	30.498	30.5008	30.4882	30.45
	1.42637	-0.187691	O60749;D6RC15	O60749	Sorting nexin-2	SNX2	1877					18	18	16	36.8	36.8	32.8	58.47	77.869	4513300000	27	112	26.1847	26.3683	26.2427	26.3558	26.492	26.6235	26.3822	26.4045
	0.417803	-0.0357251	O60763;REV__R4GMN2;REV__Q5VZ89	O60763	General vesicular transport factor p115	USO1	1878					26	26	26	33	33	33	107.89	179.39	7504700000	43	215	26.288	26.2979	26.2765	26.2805	26.3308	26.3685	26.3741	26.2124
	0.539371	0.768974	O60783	O60783	28S ribosomal protein S14, mitochondrial	MRPS14	1879					1	1	1	10.2	10.2	10.2	15.139	6.3909	611380000	6	14	25.5991	25.3816	25.3141	25.1891	25.394	25.0523	22.6481	25.3134
	0.261675	-0.0645628	U3KQK0;Q99879;Q99877;Q93079;Q5QNW6;P62807;P58876;P57053;O60814;Q99880;Q96A08;A0A2R8Y619	U3KQK0;Q99879;Q99877;Q93079;Q5QNW6;P62807;P58876;P57053;O60814;Q99880	Histone H2B;Histone H2B type 1-M;Histone H2B type 1-N;Histone H2B type 1-H;Histone H2B type 2-F;Histone H2B type 1-C/E/F/G/I;Histone H2B type 1-D;Histone H2B type F-S;Histone H2B type 1-K;Histone H2B type 1-L	HIST1H2BN;HIST1H2BM;HIST1H2BH;HIST2H2BF;HIST1H2BC;HIST1H2BD;H2BFS;HIST1H2BK;HIST1H2BL	1881					9	9	2	44	44	6	18.804	153.29	258200000000	8	397	33.1806	32.7616	32.9185	32.7571	32.9683	33.0097	32.9167	32.9814
	0.155935	-0.0518527	O60826	O60826	Coiled-coil domain-containing protein 22	CCDC22	1882					7	7	7	16.1	16.1	16.1	70.755	26.148	936190000	36	37	24.4709	24.9538	24.7722	24.97	24.8236	24.8663	24.7142	24.9702
	0.86983	-1.55755	O60828;H7C053;A0A5H1ZRR1	O60828;H7C053;A0A5H1ZRR1	Polyglutamine-binding protein 1	PQBP1	1883					6	6	6	38.9	38.9	38.9	30.472	23.742	1170200000	10	28	26.2406	22.6063	23.3973	25.8702	26.2665	26.0895	26.0567	25.932
	1.28574	-1.38795	O60830;V9GYS0;V9GYU0	O60830;V9GYS0;V9GYU0	Mitochondrial import inner membrane translocase subunit Tim17-B	TIMM17B	1884					2	2	2	16.9	16.9	16.9	18.273	3.3613	288500000	9	6	24.0508	22.9509	21.6719	23.9463	24.5773	24.5017	24.9146	24.1781
	0.11434	0.236725	O60831;A6NP52;A6NM71	O60831;A6NP52;A6NM71	PRA1 family protein 2	PRAF2	1885					2	2	2	16.9	16.9	16.9	19.258	6.229	314330000	6	9	24.5872	22.9843	23.873	24.4924	24.9735	24.7437	22.1403	23.1324
	0.242905	-0.0381246	O60832;C9IYT0;H7C0M1;H7C2Q9;H7C2Q2;H7BZF2	O60832;C9IYT0	H/ACA ribonucleoprotein complex subunit 4	DKC1	1886					11	11	11	32.1	32.1	32.1	57.673	57.88	4252600000	31	88	26.717	26.5091	26.6927	26.5324	26.6984	26.5949	26.7217	26.5886
	0.98544	-0.145628	O60869	O60869	Endothelial differentiation-related factor 1	EDF1	1887					5	5	5	32.4	32.4	32.4	16.368	90.057	7340500000	9	68	27.8566	27.937	28.0479	27.9503	28.088	27.9399	28.2578	28.0886
	0.13811	-0.0284972	O60884;A0A087WT48	O60884	DnaJ homolog subfamily A member 2	DNAJA2	1889					15	15	15	46.6	46.6	46.6	45.745	116.89	10393000000	22	125	27.855	27.6336	27.9842	27.7368	27.8304	27.8467	27.8687	27.7777
	0.638163	-1.3136	O60885;M0QZD9	O60885;M0QZD9	Bromodomain-containing protein 4	BRD4	1890					6	6	4	4.6	4.6	3.3	152.22	8.5217	1155600000	48	24	22.9477	23.157	26.2836	26.5679	26.1608	26.126	26.2161	25.7078
	1.93031	-0.470557	O60888;C9IZG4;C9IZQ5	O60888;C9IZG4	Protein CutA	CUTA	1891					3	3	3	33	33	33	19.116	44.297	4241700000	6	35	28.3372	28.047	28.315	28.1222	28.9304	28.7251	28.3947	28.6535
	0.603742	-0.316957	O60930	O60930	Ribonuclease H1	RNASEH1	1893					1	1	1	7.3	7.3	7.3	32.064	3.6708	149650000	14	11	23.2241	23.1016	23.0281	23.0538	23.8628	23.167	23.791	22.8546
	1.89016	-0.206085	O75083;D6RD66	O75083;D6RD66	WD repeat-containing protein 1	WDR1	1895					26	26	26	62.7	62.7	62.7	66.193	323.31	22431000000	30	286	27.9754	27.9492	27.8823	28.0863	28.1304	28.2722	28.221	28.094
	0.655413	-0.110895	O75116;E9PF63;Q14DU5;D6REE7;C9JFJ0	O75116;E9PF63;Q14DU5	Rho-associated protein kinase 2	ROCK2	1896					22	22	20	17.8	17.8	16.4	160.9	62.826	4275600000	80	117	26.9821	27.0083	26.7961	26.7912	26.9793	27.1325	27.0447	26.8647
	0.513767	-0.0591993	O75131;A0A087WYQ3;H0YB26;E5RHZ0;A0A087WXR6;E5RFT7;A0A087WUS8	O75131;A0A087WYQ3	Copine-3	CPNE3	1897					12	12	11	26.8	26.8	25.1	60.13	42.098	6159800000	24	94	27.1278	27.3419	27.2968	27.2374	27.3086	27.2495	27.3073	27.3753
	0.135444	0.107511	O75146	O75146	Huntingtin-interacting protein 1-related protein	HIP1R	1898					3	2	2	3.5	2.2	2.2	119.39	3.7312	74740000	63	9	22.7454	23.2364	23.3928	22.2397	22.6766	22.5676	22.7104	23.2298
	0.233742	0.597143	O75157;A0A087X0H8;H0Y865;Q15714	O75157	TSC22 domain family protein 2	TSC22D2	1899					3	3	3	2.4	2.4	2.4	79.227	4.6352	485220000	12	18	25.7498	22.9068	25.6446	25.6929	23.7939	22.5317	25.6659	25.6139
	0.798452	-0.556251	O75165;A0A3B3IRM0;H0YA63	O75165	DnaJ homolog subfamily C member 13	DNAJC13	1900					6	6	6	4	4	4	254.41	17.648	295290000	112	21	23.4973	22.2439	23.6301	23.5599	23.4969	23.8115	23.8938	23.9539
	0.591722	-0.152754	O75208;H3BNT2;H3BSJ5;H3BRC0;H3BPY0;H3BPC6;H3BPW3;H3BVA5	O75208;H3BNT2;H3BSJ5;H3BRC0	Ubiquinone biosynthesis protein COQ9, mitochondrial	COQ9	1902					7	7	7	33.6	33.6	33.6	35.509	38.854	1438000000	13	44	25.776	25.6785	25.6037	25.5426	25.5828	25.7402	26.1101	25.7787
	1.74604	0.478929	O75223;M0QZK8;B8ZZK2;H7BZK5;A0A0B4J1Y4	O75223;M0QZK8;B8ZZK2;H7BZK5	Gamma-glutamylcyclotransferase	GGCT	1903					8	8	8	54.8	54.8	54.8	21.007	55.993	2323100000	13	47	26.7628	26.4569	26.5032	26.4399	26.1707	26.209	26.1885	25.6789
	0.674313	0.168213	O75306;A0A7I2YQG7;A0A7I2V4X8;A0A7I2V596;A0A7I2V4G5;A0A7I2V5E2;A0A7I2V630;A0A7I2V410;A0A7I2V4W5;A0A7I2V2B9;A0A7I2V3J6;A0A7I2YQD8;A0A7I2V5G4;A0A7I2V517;A0A7I2V5D5	O75306;A0A7I2YQG7;A0A7I2V4X8;A0A7I2V596;A0A7I2V4G5;A0A7I2V5E2;A0A7I2V630;A0A7I2V410;A0A7I2V4W5;A0A7I2V2B9;A0A7I2V3J6;A0A7I2YQD8;A0A7I2V5G4	NADH dehydrogenase [ubiquinone] iron-sulfur protein 2, mitochondrial	NDUFS2	1904					12	12	12	34.6	34.6	34.6	52.545	226.41	5957300000	25	131	26.8433	26.997	26.9518	26.655	26.6352	26.7442	26.4757	26.9191
+	1.56595	-1.73866	O75312;H7C0E5;H7BZM7;H7C449	O75312;H7C0E5;H7BZM7	Zinc finger protein ZPR1	ZPR1	1905					6	6	6	17.9	17.9	17.9	50.925	20.943	534850000	26	10	23.3311	22.3359	22.8493	25.0264	25.348	24.821	24.9777	25.3506
	0.0986292	-0.0316858	O75323;C9K068;C9J7B1;H7C333;F8WBI5	O75323	Protein NipSnap homolog 2	GBAS	1907					5	5	5	30.4	30.4	30.4	33.742	81.195	2154900000	16	49	26.1724	26.3824	26.1263	26.3361	26.056	26.2309	26.5371	26.3199
	0.179514	0.0433459	O75340;A0A024QZ42;A0A6Q8PH81;H0Y9X3;A0A087WZ38;D6RA21;Q86W51	O75340;A0A024QZ42	Programmed cell death protein 6	PDCD6	1908					8	8	8	65.4	65.4	65.4	21.868	97.312	5157500000	11	75	27.1987	27.3307	27.0933	27.2332	27.0051	27.2742	27.0648	27.3386
	0.606529	0.169268	O75348;A0A7I2V4K4;A0A7I2V3Q6;A0A7I2V375	O75348	V-type proton ATPase subunit G 1	ATP6V1G1	1909					3	3	3	39	39	39	13.757	58.099	1430800000	7	22	26.2086	26.3378	26.3019	26.2557	25.7395	26.2477	26.3191	26.1208
	0.124456	0.0307732	O75351;Q6PIW4	O75351	Vacuolar protein sorting-associated protein 4B	VPS4B	1910					11	9	9	29.7	25.5	25.5	49.301	26.307	1751100000	25	52	25.8578	26.0911	25.9441	26.1767	26.1551	25.8839	25.9489	25.9586
	2.06037	-0.196282	O75367;B4DJC3;D6RCF2;A0A7I2V4D9;A0A7I2YQB9	O75367;B4DJC3	Core histone macro-H2A.1;Histone H2A	H2AFY	1912					17	17	15	55.9	55.9	48.9	39.617	197.45	20862000000	18	159	28.6053	28.806	28.6369	28.6787	28.8612	28.8769	28.9496	28.8243
+	2.43076	0.493243	O75368	O75368	SH3 domain-binding glutamic acid-rich-like protein	SH3BGRL	1913					4	4	4	46.5	46.5	46.5	12.774	22.203	1902300000	8	35	26.8969	26.5712	26.7487	26.6917	26.3878	26.3632	26.0546	26.1299
	0.526049	-0.0377917	O75369;E7EN95	O75369;E7EN95	Filamin-B	FLNB	1914					135	135	1	69.1	69.1	1.3	278.16	323.31	211550000000	142	1769	29.8291	29.8658	29.8592	29.7765	29.9347	29.8064	29.869	29.8715
	0.812369	-0.199702	O75380;D6RBT3	O75380;D6RBT3	NADH dehydrogenase [ubiquinone] iron-sulfur protein 6, mitochondrial	NDUFS6	1916					3	3	3	39.5	39.5	39.5	13.711	62.416	2095700000	8	37	26.4812	26.5301	26.1475	26.1577	26.3958	26.4456	26.6918	26.582
	1.85223	-0.303205	O75381;K7EK59	O75381	Peroxisomal membrane protein PEX14	PEX14	1917					4	4	4	9.3	9.3	9.3	41.236	7.0891	205890000	15	16	23.1655	22.8829	22.9109	22.9321	23.4103	23.3228	23.2436	23.1275
	1.44004	-0.390082	O75391;I3L0X5;I3L4C3;I3L0Q5	O75391;I3L0X5;I3L4C3	Sperm-associated antigen 7	SPAG7	1918					6	6	6	38.8	38.8	38.8	26.034	27.052	802350000	12	29	24.9222	24.553	24.6748	24.756	25.1973	25.4036	25.0443	24.8211
	0.0548058	-0.0919628	O75394	O75394	39S ribosomal protein L33, mitochondrial	MRPL33	1919					1	1	1	16.9	16.9	16.9	7.6191	3.1332	418020000	3	12	24.8828	22.7174	24.8446	25.2929	24.421	24.4944	24.3551	24.8351
	1.16514	0.154045	O75396;A0A087X1A9	O75396	Vesicle-trafficking protein SEC22b	SEC22B	1920					9	9	9	55.8	55.8	55.8	24.74	66.288	6868200000	12	71	28.783	28.8409	28.9462	28.9795	28.8541	28.7836	28.6716	28.624
	0.411562	0.106096	O75410;E5RFM9;H0YAY0;R4GMT7;E7EVI4;E7ET87;H0YBT8;B4E3H6;E5RJG6;A0A0C4DGD3;E5RJU4;A0A0C4DGD5	O75410;E5RFM9;H0YAY0;R4GMT7;E7EVI4;E7ET87;H0YBT8	Transforming acidic coiled-coil-containing protein 1	TACC1	1921					14	14	13	24.2	24.2	23.2	87.793	31.047	1272200000	43	42	24.9098	25.1627	24.9706	25.3633	24.9524	25.0599	25.0929	24.8768
	0.323159	0.100774	O75436;S4R3Q6;S4R2Y3	O75436;S4R3Q6	Vacuolar protein sorting-associated protein 26A	VPS26A	1923					14	14	12	48.9	48.9	44.6	38.169	176.53	4647500000	19	78	26.9914	26.9913	27.0003	27.1327	27.2502	26.9303	26.9066	26.6256
	0.469672	-0.230349	O75438	O75438	NADH dehydrogenase [ubiquinone] 1 beta subcomplex subunit 1	NDUFB1	1924					5	5	5	70.7	70.7	70.7	6.9611	21.306	649650000	3	33	25.1855	24.5185	24.7122	25.0388	24.6143	25.3057	25.1886	25.2677
	1.8064	0.29687	O75439;G3V0E4;F8WAZ6;F8WEA6;F8WBE1	O75439;G3V0E4	Mitochondrial-processing peptidase subunit beta	PMPCB	1925					10	9	9	29.9	28.4	28.4	54.366	47.952	1916900000	26	54	26.326	26.6292	26.3775	26.4589	26.2185	26.0629	26.04	26.2828
	2.48105	-0.226749	O75475	O75475	PC4 and SFRS1-interacting protein	PSIP1	1926					13	12	12	27.9	26.4	26.4	60.103	83.886	5578600000	28	102	26.775	26.6642	26.6695	26.5899	26.8265	26.9535	26.8823	26.9435
	0.957086	-0.192072	O75477;B0QZ43	O75477;B0QZ43	Erlin-1	ERLIN1	1927					9	6	6	32.2	23.3	23.3	39.171	48.924	2416100000	20	42	26.5339	26.794	26.5368	26.5467	26.5588	26.918	26.8616	26.8413
	1.08949	0.169525	O75489;E9PS48;G3V194;E9PKL8	O75489	NADH dehydrogenase [ubiquinone] iron-sulfur protein 3, mitochondrial	NDUFS3	1928					15	15	15	56.8	56.8	56.8	30.241	72.198	4911500000	17	137	26.6581	26.9752	26.7797	26.9812	26.7344	26.6602	26.6546	26.667
	0.639081	0.206415	Q5JRI1;O75494;Q8WXF0;Q6IQ42	Q5JRI1;O75494	Serine/arginine-rich splicing factor 10	SRSF10	1929					6	6	6	29.7	29.7	29.7	20.913	63.988	2980000000	9	77	26.3457	26.6543	26.9719	26.3862	26.4959	26.4348	26.3546	26.2472
	0.632783	-0.601429	O75506	O75506	Heat shock factor-binding protein 1	HSBP1	1930					3	3	3	64.5	64.5	64.5	8.5435	106.81	614900000	5	29	23.4973	25.1776	25.4204	25.1693	25.6938	25.3639	25.2681	25.3446
	1.22669	-0.160903	O75531;E9PJJ8	O75531	Barrier-to-autointegration factor;Barrier-to-autointegration factor, N-terminally processed	BANF1	1931					8	8	8	62.9	62.9	62.9	10.058	42.667	34909000000	6	104	30.1436	29.9643	30.0092	30.0028	30.0501	30.3222	30.1627	30.2285
	1.06965	-0.115549	O75533;H7C341;B4DGZ4;F8WC19	O75533	Splicing factor 3B subunit 1	SF3B1	1932					41	41	37	47	47	42.6	145.83	323.31	21549000000	62	350	28.1547	28.1443	28.3299	28.1049	28.2309	28.3143	28.2975	28.3534
	0.0827177	0.0172715	O75534;E9PLT0;E9PNG3;E9PLD4;E9PJK7;E9PKN4	O75534;E9PLT0	Cold shock domain-containing protein E1	CSDE1	1933					23	23	23	33.7	33.7	33.7	88.884	93.422	7013700000	46	144	26.8625	26.7661	26.5486	26.7816	26.7265	26.8118	26.7068	26.6447
	0.236902	-0.0453744	O75569;A0A7I2YQ87;A0A7I2V5H3;A0A7I2V3J2;G5E9Q4;A0A7I2V5C2;A0A7I2V3L6;B4DJC7;A0A7I2V2I8;A0A7I2V332;A0A7I2V315;A0A7I2V2P4;F8WEG8;C9JMM3;A0A7I2V593	O75569;A0A7I2YQ87;A0A7I2V5H3;A0A7I2V3J2;G5E9Q4;A0A7I2V5C2;A0A7I2V3L6;B4DJC7;A0A7I2V2I8	Interferon-inducible double-stranded RNA-dependent protein kinase activator A	PRKRA	1934					8	8	8	34.8	34.8	34.8	34.404	51.773	1660100000	14	66	25.4981	25.3211	25.4695	25.6502	25.4718	25.4577	25.5834	25.6076
	1.07801	-0.251589	O75607	O75607	Nucleoplasmin-3	NPM3	1935					6	6	6	60.1	60.1	60.1	19.343	198.07	3647800000	8	70	26.5868	26.5251	26.5666	26.3929	26.4567	26.7521	26.9614	26.9075
	0.0358096	0.00789499	O75608;A0A087X1K9;E5RGR0;B4DP64;E5RJ48;E5RI35	O75608;A0A087X1K9;E5RGR0;B4DP64	Acyl-protein thioesterase 1	LYPLA1	1936					9	9	9	77.8	77.8	77.8	24.669	155.61	6156000000	12	117	27.4629	27.6153	27.5817	27.4637	27.3403	27.6411	27.5287	27.582
	0.164425	-0.0519581	O75616;J3QSB2;J3QRV9;K7EQJ8	O75616	GTPase Era, mitochondrial	ERAL1	1937					5	5	5	16.2	16.2	16.2	48.349	8.5357	587630000	22	31	24.3441	24.4551	24.3995	24.149	24.3414	24.5891	24.5011	24.124
	1.90512	-0.195277	O75643;A0A494C1A5	O75643;A0A494C1A5	U5 small nuclear ribonucleoprotein 200 kDa helicase	SNRNP200	1938					68	68	68	41.2	41.2	41.2	244.5	323.31	21901000000	118	488	27.4817	27.4685	27.3039	27.5257	27.6808	27.6621	27.6562	27.5619
	1.96437	0.368515	O75663	O75663	TIP41-like protein	TIPRL	1939					13	13	13	64.7	64.7	64.7	31.444	67.434	2659700000	16	107	25.9578	25.9569	26.1637	25.9725	25.6768	25.4402	25.5974	25.8625
	1.61274	-0.648854	O75683	O75683	Surfeit locus protein 6	SURF6	1940					1	1	1	3.3	3.3	3.3	41.45	17.619	266990000	15	16	23.9947	23.0523	23.5924	23.5601	24.1586	24.4574	23.9752	24.2037
	0.84089	-0.224403	O75688;C9JIR6;A0A3B3IS24;B8ZZF0	O75688;C9JIR6;A0A3B3IS24;B8ZZF0	Protein phosphatase 1B	PPM1B	1941					9	9	7	26.7	26.7	22.1	52.642	78.516	1423500000	22	50	25.0929	24.9863	24.9294	24.5209	25.176	25.1893	24.9901	25.0717
	0.0117386	-0.00820684	O75691	O75691	Small subunit processome component 20 homolog	UTP20	1942					10	10	10	4.8	4.8	4.8	318.38	26.026	1324000000	138	30	26.1302	26.6144	26.4583	26.906	26.5439	26.0485	26.7915	26.7577
+	3.09797	-1.03428	O75717;C9JYB3	O75717	WD repeat and HMG-box DNA-binding protein 1	WDHD1	1944					11	11	11	15.8	15.8	15.8	125.97	89.078	1073400000	59	45	24.6575	24.0018	24.2075	24.3317	25.0645	25.367	25.4964	25.4077
	0.183874	-0.239377	O75718;C9JP16	O75718;C9JP16	Cartilage-associated protein	CRTAP	1945					6	6	6	17.2	17.2	17.2	46.561	13.456	730540000	25	34	25.0107	23.3801	24.7442	25.7658	24.655	24.9946	25.0901	25.1186
	1.58752	-0.328187	O75794;X6RA30;X6RF82;X6RKY7;H7BZW7	O75794;X6RA30;X6RF82	Cell division cycle protein 123 homolog	CDC123	1948					8	8	8	29.2	29.2	29.2	39.134	11.95	1011000000	16	31	25.2737	25.1375	25.3645	25.3667	25.7792	25.6079	25.7268	25.3414
+	2.65356	1.2038	O75818;X6RLL4;A0A087X1N3;F8WC38	O75818;X6RLL4;A0A087X1N3	Ribonuclease P protein subunit p40	RPP40	1950					5	5	5	17.9	17.9	17.9	41.833	13.754	305950000	19	15	23.6194	24.0622	24.0565	24.2687	23.1417	22.5156	23.1169	22.4174
	1.63339	-0.20887	O75821;K7EL20;K7ENA8;K7ER90;K7EP16;K7EL60;K7ENH0	O75821;K7EL20;K7ENA8;K7ER90	Eukaryotic translation initiation factor 3 subunit G	EIF3G	1951					12	12	12	50	50	50	35.611	232.51	10763000000	19	97	27.8481	27.833	27.9543	27.8909	28.1883	28.1914	28.0574	27.9246
	0.0774091	-0.0181575	O75822;H0YGJ7;H0YLP3	O75822	Eukaryotic translation initiation factor 3 subunit J	EIF3J	1952					12	12	12	48.1	48.1	48.1	29.062	70.662	5703100000	14	98	27.4328	27.1434	27.2507	27.2259	27.3227	27.1238	27.4005	27.2785
	0.106687	-0.0292258	O75828	O75828	Carbonyl reductase [NADPH] 3	CBR3	1953					6	5	5	29.6	24.9	24.9	30.85	10.438	2449600000	16	26	27.7859	27.7212	27.7125	27.4961	27.6715	27.6588	27.9346	27.5676
	0.580431	0.154074	O75832;B1AJY7;B1AJY5;B1AJY6	O75832;B1AJY7;B1AJY5	26S proteasome non-ATPase regulatory subunit 10	PSMD10	1954					10	10	10	50.9	50.9	50.9	24.428	138.78	7883700000	12	124	28.2827	28.4232	27.9237	28.107	28.0911	28.1216	27.8486	28.0589
	0.893841	-0.137209	O75844;A0A6Q8PHG9;A0A6Q8PF67;A0A6Q8PH40	O75844	CAAX prenyl protease 1 homolog	ZMPSTE24	1956					10	10	10	28.8	28.8	28.8	54.812	96.762	2407700000	19	69	26.3285	26.1721	26.1349	26.4283	26.2951	26.4284	26.4583	26.4308
	0.120069	0.0197692	O75874;C9J4N6;C9JJE5;C9JLU6	O75874	Isocitrate dehydrogenase [NADP] cytoplasmic	IDH1	1957					20	20	19	56	56	53.9	46.659	308.89	25398000000	25	230	28.9884	28.8403	28.9636	29.029	29.0524	28.9469	28.9129	28.83
	0.0603962	-0.0174422	O75884	O75884	Putative hydrolase RBBP9	RBBP9	1958					4	4	4	37.1	37.1	37.1	21	39.736	1107500000	10	27	25.5099	25.3681	25.4609	25.1363	25.4513	25.4279	25.2076	25.4581
	0.73652	0.339962	O75886	O75886	Signal transducing adapter molecule 2	STAM2	1959					6	6	4	14.5	14.5	10.9	58.164	59.54	36814000000	24	60	30.9283	31.276	31.3042	30.9738	30.1799	30.9437	30.9159	31.083
	1.31467	0.261687	O75911;Q5SUY4	O75911;Q5SUY4	Short-chain dehydrogenase/reductase 3	DHRS3	1961					4	4	4	17.9	17.9	17.9	33.548	11.77	927110000	13	34	25.0169	25.4008	25.2019	25.4076	25.0226	25.1036	24.8606	24.9938
	1.10899	0.249576	O75915;F8WF90;C9JQU6;F8WF33	O75915	PRA1 family protein 3	ARL6IP5	1962					6	6	6	27.7	27.7	27.7	21.614	52.42	2558400000	5	59	26.5274	26.7424	26.5458	26.5548	26.0677	26.3021	26.4387	26.5636
	1.24136	-0.248079	O75934	O75934	Pre-mRNA-splicing factor SPF27	BCAS2	1963					8	8	8	52	52	52	26.131	64.435	1513900000	13	42	25.4537	25.708	25.5887	25.4953	25.5421	25.9123	25.8788	25.9049
	0.810461	-0.232183	X6RCK5;O75935;X6RA56;A0A0A0MRV8;X6RLR1	X6RCK5;O75935;X6RA56;A0A0A0MRV8;X6RLR1	Dynactin subunit 3	DCTN3	1964					4	4	4	31.8	31.8	31.8	17.299	15.557	898010000	10	21	25.6511	25.2016	25.6383	25.2691	25.6264	25.4714	25.769	25.8222
	0.73167	-0.139105	O75937;S4R3J5	O75937	DnaJ homolog subfamily C member 8	DNAJC8	1965					10	10	10	37.2	37.2	37.2	29.841	69.155	4417700000	13	83	27.6624	27.3886	27.342	27.2545	27.639	27.5401	27.518	27.5069
	0.13427	-0.428081	O75940	O75940	Survival of motor neuron-related-splicing factor 30	SMNDC1	1966					3	3	3	20.2	20.2	20.2	26.711	27.451	709970000	9	12	26.067	23.8351	22.8871	26.0529	22.4537	26.1204	26.0056	25.9747
	0.885085	-0.179721	O75947;F5H608	O75947;F5H608	ATP synthase subunit d, mitochondrial	ATP5H	1967					8	8	8	65.2	65.2	65.2	18.491	113.37	8631300000	10	78	27.3365	27.061	27.3833	27.5253	27.449	27.5678	27.4502	27.5579
	1.30216	-0.853176	O75955;A0A140T9R1;A0A140T9W4;A0A140T974;A2AB10;A2AB12;A2AB09;A0A140T9X0;A0A0G2JJQ6;A2AB13;A2AB11;A0A140T959;A0A140T9C3;A0A140T910;A0A140T957;A0A140T9B1;A0A140T905;A2ABJ5;A0A140T907	O75955;A0A140T9R1;A0A140T9W4	Flotillin-1	FLOT1	1968					14	14	14	43.1	43.1	43.1	47.355	67.903	3285200000	27	72	26.5045	26.6725	25.3806	26.8185	26.9136	27.2406	27.4884	27.1461
	0.913774	-0.146369	O75976;J3QRJ9	O75976	Carboxypeptidase D	CPD	1969					19	19	19	18.8	18.8	18.8	152.93	99.388	2319400000	71	83	26.2156	26.2301	25.9576	26.1652	26.27	26.3328	26.396	26.1552
	0.178376	-0.0155354	O76003	O76003	Glutaredoxin-3	GLRX3	1970					15	15	15	55.2	55.2	55.2	37.432	304.91	15555000000	18	171	28.4596	28.4571	28.52	28.4881	28.4067	28.5216	28.5159	28.5427
	0.00672658	0.00163126	O76021;J3QSV6;I3L3C4;I3L3U9;I3L234;I3L1A3	O76021;J3QSV6;I3L3C4;I3L3U9	Ribosomal L1 domain-containing protein 1	RSL1D1	1971					14	14	14	33.7	33.7	33.7	54.972	50.591	9008100000	22	129	27.7305	27.7764	27.8757	28.0189	27.9674	27.8431	27.8622	27.7222
	1.71567	-0.254183	O76031;H0YM48;H0YK07	O76031	ATP-dependent Clp protease ATP-binding subunit clpX-like, mitochondrial	CLPX	1972					15	15	15	28.6	28.6	28.6	69.223	56.535	3336000000	39	107	26.0773	25.9349	25.912	25.832	26.3152	26.2655	26.1541	26.038
	0.354744	-0.0701241	O76071	O76071	Probable cytosolic iron-sulfur protein assembly protein CIAO1	CIAO1	1973					7	7	7	31.9	31.9	31.9	37.84	32.787	1579100000	16	49	25.5226	25.7703	25.818	25.8754	25.715	25.8337	25.8447	25.8735
+	2.74167	-0.488175	O76094;D6RDY6;R4GNC1	O76094;D6RDY6	Signal recognition particle subunit SRP72	SRP72	1975					14	14	14	30.1	30.1	30.1	74.605	88.38	4205900000	33	68	26.8904	26.6112	26.5716	26.5084	27.2102	27.1813	27.0787	27.064
	0.87974	0.0976791	O94760;B4DYP1	O94760;B4DYP1	N(G),N(G)-dimethylarginine dimethylaminohydrolase 1	DDAH1	1976					9	9	8	43.2	43.2	40.4	31.121	11.467	1121600000	17	29	25.4914	25.3681	25.3904	25.3773	25.3684	25.3378	25.166	25.3644
	0.374291	0.604305	O94763;I3L104;I3NI51;I3L2V7	O94763;I3L104;I3NI51	Unconventional prefoldin RPB5 interactor 1	URI1	1977					3	3	3	8.6	8.6	8.6	59.832	5.6925	242370000	21	13	24.0785	24.2007	24.4291	23.4829	21.7921	22.9177	24.3723	24.6919
	0.120542	-0.0614347	O94776	O94776	Metastasis-associated protein MTA2	MTA2	1978					12	12	12	24	24	24	75.022	31.629	1691300000	45	45	25.9759	25.7883	25.4855	25.4002	25.3644	25.6747	25.9765	25.8799
	3.3864	-0.223681	O94826	O94826	Mitochondrial import receptor subunit TOM70	TOMM70A	1980					18	18	18	40.6	40.6	40.6	67.454	212.49	7443300000	31	151	26.5973	26.6516	26.6053	26.5232	26.8416	26.7784	26.8525	26.7996
	0.156565	0.47531	O94855;E9PDM8;E9PC44	O94855;E9PDM8	Protein transport protein Sec24D	SEC24D	1982					4	3	3	6.2	4.8	4.8	113.01	27.775	821500000	40	14	26.2058	26.1872	22.8839	27.3228	26.1316	23.233	25.4993	25.8345
	0.781502	-0.120326	O94874	O94874	E3 UFM1-protein ligase 1	UFL1	1983					11	11	11	17.8	17.8	17.8	89.594	27.889	1291200000	47	45	25.6586	25.4182	25.3277	25.3684	25.5478	25.5517	25.6156	25.5391
	1.98784	0.500758	O94903;E5RFX7;E5RG77;H0YBG2;E5RFZ4	O94903;E5RFX7;E5RG77	Proline synthase co-transcribed bacterial homolog protein	PROSC	1985					7	7	7	33.1	33.1	33.1	30.344	29.826	2153900000	14	63	25.8004	26.2739	26.2715	26.1837	25.4335	25.6039	25.6996	25.7893
	0.75627	-0.125203	O94906	O94906	Pre-mRNA-processing factor 6	PRPF6	1986					27	27	27	34.8	34.8	34.8	106.92	89.862	4215200000	56	134	26.0829	26.0765	25.9308	25.9375	25.9416	26.1603	26.2771	26.1496
	0.089765	-0.038208	O94907;D6RGF1;D6RCC2;Q9UBU2	O94907	Dickkopf-related protein 1	DKK1	1987					5	5	5	19.5	19.5	19.5	28.671	29.322	775630000	13	39	25.0633	24.8827	24.7462	24.7893	24.5001	25.1064	25.0119	25.0159
+	2.42419	0.500535	O94925;H7BZD1;C9JIJ6;B7Z509;H7C201	O94925	Glutaminase kidney isoform, mitochondrial	GLS	1989					16	16	14	32.9	32.9	28.6	73.46	266.94	9496900000	35	152	27.6374	27.4706	27.5206	27.4301	26.8188	26.9743	26.9709	27.2925
	1.03502	-0.221003	O94973;A0A0G2JS82;A0A0G2JQM1;E9PR62;A0A0G2JRF9;A0A0G2JQA4;E9PNC4;A0A0G2JRS3	O94973;A0A0G2JS82;A0A0G2JQM1	AP-2 complex subunit alpha-2	AP2A2	1990					20	12	12	30.7	20.1	20.1	103.96	129.35	3113800000	49	78	25.8976	26.0419	25.6688	26.0392	26.317	26.1308	26.0004	26.0833
+	3.70815	-0.511598	O94992	O94992	Protein HEXIM1	HEXIM1	1991					10	10	9	36.2	36.2	34	40.623	150.92	4797100000	13	84	26.3869	26.5656	26.4494	26.5717	26.9327	26.9242	27.0692	27.094
	0.160598	-0.131233	O95049	O95049	Tight junction protein ZO-3	TJP3	1992					2	2	2	2.8	2.8	2.8	101.4	4.5535	64934000	42	14	21.9781	22.3099	22.9759	22.0003	23.0434	22.0457	22.3276	22.3724
	0.435628	0.105388	O95081;A0A0C4DG34	O95081;A0A0C4DG34	Arf-GAP domain and FG repeat-containing protein 2	AGFG2	1995					4	4	4	13.3	13.3	13.3	48.962	12.629	607770000	15	28	24.8778	25.0335	24.7938	25.1468	25.0322	24.9162	24.6954	24.7866
	0.753702	-0.754919	O95084	O95084	Serine protease 23	PRSS23	1996					3	3	3	10.2	10.2	10.2	43.001	6.1313	397810000	22	16	23.9717	24.6826	22.5611	24.2484	24.1787	24.5289	24.7482	25.0275
	0.797235	-0.325772	O95149;H3BQR0;H3BTA6;H3BSK1;H3BRI5	O95149;H3BQR0;H3BTA6;H3BSK1;H3BRI5	Snurportin-1	SNUPN	1998					3	3	3	9.2	9.2	9.2	41.142	4.8439	146750000	19	12	23.5039	22.9	23.3846	23.1139	23.9781	23.5456	23.3077	23.3741
	0.285928	-0.0696211	O95159;E9PQ47;E9PNY1;E9PMQ3;E9PQA5;E9PJX1;E9PJ47	O95159;E9PQ47;E9PNY1	Zinc finger protein-like 1	ZFPL1	2000					7	7	7	26.8	26.8	26.8	34.114	22.377	1185100000	13	56	25.4678	25.5843	25.2299	25.4972	25.4123	25.7024	25.5208	25.4222
	0.397922	-0.198139	O95168;F2Z3P9;C9JXQ9	O95168;F2Z3P9;C9JXQ9	NADH dehydrogenase [ubiquinone] 1 beta subcomplex subunit 4	NDUFB4	2002					4	4	4	27.9	27.9	27.9	15.208	8.5722	1276900000	5	27	25.8577	25.027	25.4287	25.6889	25.5816	26.0291	25.4574	25.7268
	0.439265	0.491038	O95169;E9PQ68;K9J7I2;E9PIZ8	O95169;E9PQ68;K9J7I2	NADH dehydrogenase [ubiquinone] 1 beta subcomplex subunit 8, mitochondrial	NDUFB8	2003					4	4	4	25.8	25.8	25.8	21.766	6.5772	398570000	8	9	23.1341	24.2707	25.0369	24.4043	23.1286	24.3932	24.0719	23.2881
	1.24186	0.210764	O95182;M0R0N0;M0R1K9	O95182;M0R0N0	NADH dehydrogenase [ubiquinone] 1 alpha subcomplex subunit 7	NDUFA7	2004					5	5	5	46	46	46	12.551	35.628	1267600000	7	27	25.837	25.7265	25.8734	26.0886	25.6011	25.5912	25.798	25.6921
	0.621389	0.20867	O95197	O95197	Reticulon-3	RTN3	2005					1	1	1	1.1	1.1	1.1	112.61	18.224	3786700000	46	17	28.0645	27.7365	27.9682	27.532	27.9024	27.5683	27.6034	27.3926
	1.12454	0.150328	O95202	O95202	LETM1 and EF-hand domain-containing protein 1, mitochondrial	LETM1	2006					20	20	20	36.7	36.7	36.7	83.353	74.508	2940000000	39	93	25.9105	26.0093	25.9515	25.8594	25.7804	25.9566	25.67	25.7224
	0.0742797	0.0366421	O95218	O95218	Zinc finger Ran-binding domain-containing protein 2	ZRANB2	2007					6	6	6	19.4	19.4	19.4	37.404	10.373	1141100000	18	29	25.4016	25.0813	24.8521	24.7279	25.0067	25.2423	24.8502	24.8171
	0.16354	-0.291925	O95219;F8W9T3	O95219;F8W9T3	Sorting nexin-4	SNX4	2008					3	3	3	9.1	9.1	9.1	51.908	13.052	267460000	26	16	23.1715	22.2485	24.3997	24.4082	22.9941	23.1659	24.5533	24.6822
	0.0745768	-0.0795655	O95235;D6RBN1	O95235	Kinesin-like protein KIF20A	KIF20A	2009					3	3	3	5.6	5.6	5.6	100.28	11.394	91135000	49	8	23.5922	22.2751	24.0302	23.1868	23.3852	23.4428	23.1111	23.4635
+	4.79607	-0.595664	O95239;Q2VIQ3	O95239	Chromosome-associated kinesin KIF4A	KIF4A	2010					12	12	12	11.4	11.4	11.4	139.88	33.383	1361800000	60	64	24.978	24.8423	24.9299	24.9608	25.5148	25.5937	25.5612	25.4241
	0.714283	-0.138567	O95292;E5RK64	O95292;E5RK64	Vesicle-associated membrane protein-associated protein B/C	VAPB	2012					6	5	5	30.5	30.5	30.5	27.228	23.25	3202500000	15	69	26.2877	26.2582	25.992	26.1823	26.3892	26.4384	26.315	26.1319
	0.477844	-0.740648	O95297;Q9UEL6	O95297	Myelin protein zero-like protein 1	MPZL1	2014					5	5	5	27.5	27.5	27.5	29.082	40.798	1720500000	10	27	26.6644	23.7221	26.4545	26.289	26.5059	26.1693	26.7734	26.6439
	0.879432	0.296763	O95298;E9PRJ5;E9PM14;A0A087WUM3;E9PQ53	O95298	NADH dehydrogenase [ubiquinone] 1 subunit C2	NDUFC2	2015					4	4	4	24.4	24.4	24.4	14.187	8.3361	1585400000	8	28	26.4314	26.9193	26.7024	26.5307	26.7414	26.1574	26.2462	26.2518
	0.873629	-0.292187	O95302;C9J4P8;Q75LS8	O95302	Peptidyl-prolyl cis-trans isomerase FKBP9	FKBP9	2016					11	10	10	21.4	21.4	21.4	63.083	37.278	1702300000	25	59	25.2466	25.5741	24.8367	25.4472	25.5173	25.606	25.4634	25.6867
	2.05577	0.179533	O95336;M0R261;M0R1L2;M0R0U3	O95336;M0R261	6-phosphogluconolactonase	PGLS	2017					11	11	11	52.3	52.3	52.3	27.547	44.653	4645400000	13	103	26.7048	26.5213	26.6475	26.5823	26.5018	26.4441	26.3944	26.3974
+	4.73086	0.503343	O95340	O95340	Bifunctional 3-phosphoadenosine 5-phosphosulfate synthase 2;Sulfate adenylyltransferase;Adenylyl-sulfate kinase	PAPSS2	2018					14	14	14	29.3	29.3	29.3	69.5	105.95	5216200000	32	110	26.9866	26.8633	26.8756	26.9144	26.3237	26.399	26.4611	26.4428
	2.55165	-0.387203	O95347;Q5T821;A0A0C4DGE5	O95347	Structural maintenance of chromosomes protein 2	SMC2	2019					29	29	29	28.7	28.7	28.7	135.65	153.91	6830900000	65	168	26.4207	26.6333	26.6302	26.3514	26.8224	26.8663	26.9757	26.9199
	0.0573246	-0.155495	O95352;C9JGL2;F8WDY9;C9JNU2;C9JKA3;C9JE55;C9J415;C9JFF4	O95352	Ubiquitin-like modifier-activating enzyme ATG7	ATG7	2020					3	3	3	9.8	9.8	9.8	77.959	9.4416	385240000	38	10	22.7877	25.7005	23.2076	24.9716	25.4668	25.4032	23.5487	22.8707
	0.113783	-0.0434623	O95372;Q5QPQ0;Q5QPQ1;Q5QPQ3;Q5QPQ2;Q5QPN5;Q5QPN9	O95372;Q5QPQ0	Acyl-protein thioesterase 2	LYPLA2	2022					6	6	6	38.5	38.5	38.5	24.737	113.4	3129600000	12	60	27.6877	27.592	27.1455	27.4845	27.4335	27.4644	27.7547	27.431
	3.46917	-0.289222	O95373;E9PLJ0;O15397	O95373	Importin-7	IPO7	2023					28	28	25	37.2	37.2	33.1	119.52	323.31	35411000000	42	342	29.4581	29.5757	29.5617	29.5604	29.8756	29.7486	29.823	29.8656
	0.0154751	0.0363278	O95400	O95400	CD2 antigen cytoplasmic tail-binding protein 2	CD2BP2	2026					5	5	5	14.7	14.7	14.7	37.646	6.9081	553020000	13	17	24.8378	23.346	22.4063	25.1027	23.3946	22.794	24.6026	24.7561
	0.20625	0.0415034	O95433;G3V438;H0YJG7;H0YJU2;G3V3W9;H0YJ63	O95433	Activator of 90 kDa heat shock protein ATPase homolog 1	AHSA1	2027					17	17	17	61.2	61.2	61.2	38.274	201.47	21571000000	20	191	29.7198	29.6763	29.4597	29.5238	29.5598	29.4563	29.5053	29.6921
	1.14226	0.366286	O95456;F8WBH7	O95456	Proteasome assembly chaperone 1	PSMG1	2028					3	3	3	15.3	15.3	15.3	32.854	27.471	1075100000	15	39	25.7834	25.4318	25.7968	25.7867	25.6398	25.4511	25.2718	24.9708
+	2.08668	-0.616518	O95466;A0A0A0MR62	O95466	Formin-like protein 1	FMNL1	2029					11	11	3	12.7	12.7	4.1	121.85	30.388	1184400000	59	52	24.7788	24.6085	24.3158	24.531	24.9703	24.9415	25.4036	25.3847
	1.54399	-0.222973	O95470;H0Y3V8;H7BXL7	O95470	Sphingosine-1-phosphate lyase 1	SGPL1	2030					5	5	5	14.1	14.1	14.1	63.523	26.323	1016400000	27	37	25.4812	25.4005	25.2143	25.549	25.6487	25.6915	25.6421	25.5546
	0.245838	0.122254	O95486	O95486	Protein transport protein Sec24A	SEC24A	2031					6	5	5	5.9	5.2	5.2	119.75	25.253	896080000	37	35	26.2916	25.3891	25.7128	25.8979	25.9152	25.6058	25.6813	25.6
	1.13055	-0.277242	O95487	O95487	Protein transport protein Sec24B	SEC24B	2032					9	9	8	9.9	9.9	9.2	137.42	26.995	1513700000	35	48	25.9324	25.4934	26.0344	25.7249	26.0079	26.1815	25.9865	26.1183
	0.817119	1.44461	O95497	O95497	Pantetheinase	VNN1	2033					3	3	3	4.9	4.9	4.9	57.011	3.4015	538630000	21	8	22.4415	23.9352	26.0581	25.1351	23.5681	22.4499	23.7062	22.0673
	1.8958	0.187618	O95571;M0QXB5;M0QY80;M0QX80	O95571;M0QXB5	Persulfide dioxygenase ETHE1, mitochondrial	ETHE1	2035					10	10	10	66.9	66.9	66.9	27.873	198.37	5214500000	15	98	27.0832	27.0338	26.8896	26.9912	26.7318	26.7782	26.8675	26.8699
	0.0801978	-0.0370913	O95602;B9ZVN9	O95602;B9ZVN9	DNA-directed RNA polymerase I subunit RPA1;DNA-directed RNA polymerase	POLR1A	2036					9	9	9	7.2	7.2	7.2	194.81	29.602	1004700000	94	51	24.4632	24.5078	24.3285	24.5509	24.7691	24.1395	24.7682	24.3221
+	4.47079	2.65194	O95625	O95625	Zinc finger and BTB domain-containing protein 11	ZBTB11	2037					2	2	2	3.5	3.5	3.5	119.38	2.6382	270400000	42	4	25.5096	25.684	25.6756	25.4777	22.771	23.6244	22.5635	22.7802
	1.5202	-0.356673	O95674	O95674	Phosphatidate cytidylyltransferase 2	CDS2	2038					3	3	3	11.7	11.7	11.7	51.417	37.362	1734000000	17	52	25.6475	25.6718	25.4466	25.6802	25.8435	25.7289	26.2382	26.0622
	0.24934	0.22236	O95714;A0A0J9YVP0;A0A0G2JPS8;A0A3B3IRP6;Q9BVR0	O95714;A0A0J9YVP0	E3 ubiquitin-protein ligase HERC2	HERC2	2039					3	3	3	0.9	0.9	0.9	527.22	2.8646	65789000	226	10	22.9789	22.423	22.4862	23.6375	22.0051	22.667	23.0129	22.9513
	0.423293	0.121132	O95721;C9JAF7	O95721;C9JAF7	Synaptosomal-associated protein 29;Synaptosomal-associated protein	SNAP29	2040					3	3	3	12	12	12	28.97	7.8605	440280000	13	27	24.1703	24.6166	24.1535	24.1348	24.3001	24.1077	24.0726	24.1102
	0.148018	-0.0251489	O95747;C9JIG9;F8WBK9	O95747;C9JIG9	Serine/threonine-protein kinase OSR1	OXSR1	2041					12	12	10	23.9	23.9	21.1	58.022	49.123	2972100000	25	71	26.0699	26.1781	26.1623	26.1636	26.3411	26.065	26.1266	26.1419
	1.26949	0.281417	O95757;E9PDE8;D6RJ96	O95757;E9PDE8;D6RJ96	Heat shock 70 kDa protein 4L	HSPA4L	2042					24	22	22	35.8	32.4	32.4	94.511	60.256	2565500000	52	92	25.1526	25.415	25.3115	25.6976	25.0595	25.1353	25.175	25.0812
	0.731827	0.212785	O95758;X6R242	O95758	Polypyrimidine tract-binding protein 3	PTBP3	2043					8	7	7	21	19.7	19.7	59.689	49.058	3328400000	17	62	26.3271	26.7418	26.539	26.4914	26.508	25.9878	26.4193	26.3331
	2.8656	0.145092	O95782;A0A0G2JS17;A0A0G2JQT9;H0YDE9;H0YEG0;M0R2D9;E9PPZ3;E9PS94;E9PQP4;E9PPY8	O95782	AP-2 complex subunit alpha-1	AP2A1	2044					23	23	15	26.2	26.2	16.1	107.54	113.75	6787900000	53	146	27.9387	27.9439	27.8328	27.9192	27.7627	27.7634	27.7632	27.765
	0.142092	-0.0173397	O95793;Q5JW30;Q5JW28;F6UDC6	O95793;Q5JW30	Double-stranded RNA-binding protein Staufen homolog 1	STAU1	2045					16	16	15	35.4	35.4	34.1	63.182	140.59	3460800000	32	100	26.2774	26.2197	26.4091	26.2561	26.3431	26.2805	26.2635	26.3446
	1.03916	-0.656331	O95801	O95801	Tetratricopeptide repeat protein 4	TTC4	2046					6	6	6	20.2	20.2	20.2	44.678	21.332	295290000	21	17	24.0105	23.7004	22.9286	24.1495	23.8334	24.6195	24.3956	24.5659
	0.222191	0.0589447	O95810	O95810	Serum deprivation-response protein	SDPR	2047					6	6	6	18.4	18.4	18.4	47.173	21.976	1065400000	18	32	25.5064	25.5744	25.4069	25.741	25.3049	25.512	25.6949	25.481
	1.43999	-0.358319	O95816	O95816	BAG family molecular chaperone regulator 2	BAG2	2048					7	7	7	44.1	44.1	44.1	23.772	69.611	3016900000	14	61	25.8193	26.3343	26.1098	26.3193	26.3675	26.4823	26.5175	26.6487
	0.0685645	-0.0167093	O95817;C9JFK9	O95817;C9JFK9	BAG family molecular chaperone regulator 3	BAG3	2049					22	22	22	59.5	59.5	59.5	61.594	199.35	11491000000	34	243	27.7715	28.0466	27.8363	27.7237	27.9323	27.81	27.9563	27.7463
	0.591826	-0.0751247	O95861;A6NF51;F8VVW8;F8VRY7;F8VZG4;F8W1J0	O95861;A6NF51	3(2),5-bisphosphate nucleotidase 1	BPNT1	2050					7	7	7	27.3	27.3	27.3	33.392	46.229	2303200000	20	56	26.288	26.2013	26.0549	26.1857	26.297	26.2402	26.1657	26.3275
	0.62483	-0.119516	O95864;E5RGZ5	O95864	Fatty acid desaturase 2	FADS2	2051					10	10	10	28.2	28.2	28.2	52.259	63.397	6256500000	18	115	27.2611	27.2648	26.9402	27.2132	27.1881	27.2602	27.4175	27.2915
	0.770606	1.14301	O95865;H0Y7N1;A0A140T971;Q5SSV3;Q5SRR8	O95865;H0Y7N1;A0A140T971;Q5SSV3;Q5SRR8	N(G),N(G)-dimethylarginine dimethylaminohydrolase 2	DDAH2	2052					3	2	2	22.5	19.6	19.6	29.644	14.005	377320000	17	10	23.0282	25.0685	24.4812	25.4406	22.9016	22.6964	22.9825	24.866
	0.494668	-0.103226	O95881;V9GY50;V9GYV4	O95881	Thioredoxin domain-containing protein 12	TXNDC12	2053					4	4	4	26.7	26.7	26.7	19.206	14.557	3272100000	10	59	26.4756	26.5764	26.3881	26.7086	26.5627	26.5936	26.8368	26.5685
	1.77415	-0.393523	O95905;C9J316;F2Z2R1;C9JGV1	O95905;C9J316	Protein SGT1	ECD	2054					6	6	6	14.6	14.6	14.6	72.757	22.838	570460000	27	24	23.7706	24.0923	23.8793	23.9021	24.1722	24.1534	24.3079	24.585
	1.31342	0.449113	O95926	O95926	Pre-mRNA-splicing factor SYF2	SYF2	2055					1	1	1	4.5	4.5	4.5	28.722	4.2243	78213000	9	7	23.3077	23.3642	23.3899	23.8189	23.3899	23.0783	22.8363	22.7797
+	3.29397	-0.443717	O95994;B5MC07;C9J3E2;H7C3Z9;H7C040;B5MC62;Q8TD06	O95994;B5MC07;C9J3E2;H7C3Z9	Anterior gradient protein 2 homolog	AGR2	2056					8	8	8	58.9	58.9	58.9	19.979	126.68	70867000000	8	261	30.5001	30.3486	30.4058	30.4354	31.0358	30.8331	30.8128	30.783
	1.35954	-0.206744	O96005;K7EQQ1;K7EJ16;K7ERL5	O96005	Cleft lip and palate transmembrane protein 1	CLPTM1	2057					13	13	13	17.2	17.2	17.2	76.096	94.161	3946600000	27	98	26.2422	26.3136	26.3252	26.0149	26.4505	26.5214	26.3433	26.4077
	2.85853	-0.283059	O96008;K7EJ57;K7EKG4	O96008;K7EJ57	Mitochondrial import receptor subunit TOM40 homolog	TOMM40	2059					9	9	9	48.5	48.5	48.5	37.893	156.85	8385900000	10	145	27.5131	27.4714	27.5524	27.3601	27.6791	27.8086	27.7924	27.7491
	1.03424	-0.339731	O96013;M0R0L9;M0R3G6;M0R2X4	O96013;M0R0L9	Serine/threonine-protein kinase PAK 4	PAK4	2060					8	8	8	24.5	24.5	24.5	64.071	39.188	2643000000	24	57	26.3803	26.2282	25.6736	25.9073	26.332	26.4139	26.5412	26.2613
	1.70249	-0.157594	O96019;H7C5S0;O94805	O96019	Actin-like protein 6A	ACTL6A	2061					9	9	9	32.2	32.2	32.2	47.46	95.893	2732000000	20	72	26.6335	26.674	26.5884	26.5489	26.6926	26.8261	26.8554	26.7009
	1.06239	1.61013	P00156	P00156	Cytochrome b	MT-CYB	2063					1	1	1	2.6	2.6	2.6	42.717	4.7339	605040000	6	14	25.8507	25.3182	25.7076	25.4669	25.1482	25.4106	23.1315	22.2126
+	3.1702	0.607333	P00167;J3KNC7	P00167	Cytochrome b5	CYB5A	2064					5	5	5	49.3	49.3	49.3	15.33	182.71	10243000000	6	65	28.8186	28.6528	28.7251	28.5811	28.1412	28.289	27.9632	27.9549
	1.29086	0.109187	P00338;F5GXY2;F5GYU2;F5GXH2;F5H5J4;F5H6W8;F5GZQ4;F5GWW2;F5GXC7;F5H8H6;F5GXU1;P07864;Q6ZMR3;F5H5G7;F5H155;A0A087WUM2;G3XAP5;F5H245	P00338	L-lactate dehydrogenase A chain	LDHA	2065					18	18	17	66.6	66.6	63	36.688	323.31	339590000000	18	603	32.4331	32.2937	32.3227	32.352	32.1659	32.2314	32.2388	32.3287
[truncated: 2,328 more rows]
