# Supplementary material for: MDM2 Influences ACE2 Stability and SARS-CoV-2 Uptake
Source: Viruses. 2023 Aug 18;15(8):1763. doi: 10.3390/v15081763 (PMC10459000; doi:10.3390/v15081763)
Supplement: Supplementary file 1 [file viruses-15-01763-s001.zip › Supplementary Table 3.txt]

© 2000-2023 QIAGEN. All rights reserved.
Upstream Regulator	Expr Log Ratio	Molecule Type	Predicted Activation State	Activation z-score	Flags	p-value of overlap	Target Molecules in Dataset	Mechanistic Network
TGFB1		growth factor		0.148		1.98E-12	ABCG2,ACTN1,AGR2,ALDH2,BAX,BIN1,CCNB1,CCT5,CDK2,CRIP2,CTNND1,CTPS1,CTSC,DDB2,DPYSL3,ENO3,EZH2,FDXR,FN1,GLS,GNL1,GSDME,GSN,H1-10,HEXIM1,HKDC1,HMGCS1,HMOX1,HPGD,HSPG2,ITGAV,LGALS3,MCM2,MELTF,MUC5AC,MYO1C,NAMPT,NNMT,PFKP,PGRMC1,PHGDH,PROCR,PSMC3,PSPH,RAB18,RACGAP1,RDH11,RELA,SERPINB1,SLC7A5,SMAD4,SOD2,STAT1,STAT5B,STOML2,TJP2,WFS1	134 (20)
TP53		transcription regulator	Activated	3.061		2.14E-12	ABCG2,ACTB,ACTN1,ADA,AKAP12,ANLN,ANTXR1,ANXA4,ATP5F1C,AURKB,BAX,CCNB1,CDK2,CHUK,CLTA,CPT1A,CYB5A,DDB2,ENO3,EPHX1,EZH2,FDXR,FN1,GLRX,GSN,HMGCS1,HMOX1,HSPG2,ITGAV,KIF23,KNTC1,LGALS3,LSS,MCM2,MRPL1,MRTO4,MYO1C,NAMPT,NDRG1,PAICS,PEG10,PFKP,PHGDH,PSAP,PSMA2,RACGAP1,RELA,RFC1,SLC7A5,SOD2,SQSTM1,STAT1,STMN1,TOMM22,TP53I3,TUBA1C,WDHD1	125 (21)
beta-estradiol		chemical - endogenous mammalian		-0.199		1.19E-11	ABCG2,ACTB,ADA,AKAP12,ALDH2,ANTXR1,ANXA4,ATP6AP1,BAX,BAZ1A,BCAR1,BIN1,CCNB1,CDK2,CHUK,CPT1A,CSE1L,CTNND1,CTPS1,CYB5A,CYSTM1,DDB2,DOCK1,EZH2,FN1,GAA,GLS,GSN,HMGCS1,HMOX1,HPGD,INPP4B,IQGAP2,ITGAV,JAK1,KIF4A,LAGE3,LGALS3,LMNA,MCM2,MGLL,MYO1B,NAMPT,NDRG1,NEDD4L,NME3,PAPSS2,PEG10,PES1,PGRMC1,PROCR,PSAP,PSMA2,PSMC3,RAP1GAP,RBP4,RELA,RFC1,RPL14,SERPINB1,SLC7A5,SMAD4,SQSTM1,STAT1,STAT5B,SUSD2,TJP2,TP53I3…	133 (19)
lipopolysaccharide		chemical drug		-0.101		2.18E-11	ABCG2,ACE2,ACTB,ADA,ADRM1,ALDH2,ALDH3A1,ANLN,ATP6AP1,AURKB,BAX,CCNB1,CD38,CHUK,COPS7A,CPT1A,CRELD2,CTSC,CYB5A,DCBLD2,DDX27,DNAJB11,EZH2,FN1,GLRX,GLS,GSN,H1-10,HECTD1,HMOX1,HPGD,ITGAV,KIF23,KNTC1,LGALS3,MARCKS,MELTF,MUC5AC,NAMPT,NDRG1,NLRP2,NNMT,NUP93,OGT,PAPSS2,PFKP,PROCR,PSMA2,PSMG4,PTGES2,RELA,RFC1,SERPINB1,SLC7A5,SMAD4,SOD2,SQSTM1,STAT1,STMN1,STX4,TOR1AIP1,TRIR,USP39,WFS1	127 (17)
HNF4A		transcription regulator		0.000		3.54E-11	ACTN1,ADSS2,ALDH2,ALDH3A1,APIP,ARL1,BAZ1A,BCAR1,C11orf68,CCNB1,CDK2,CHMP4A,CLTA,CMSS1,COPS7A,COPS8,CPT1A,CTSZ,DCTN4,DDX27,DHX38,DOCK1,EPHX1,FDXR,GSN,GSTK1,HTRA2,ITGAV,LAS1L,LGALS3,LMAN2L,LPGAT1,MRPL27,MRPL53,MRTO4,NAMPT,NDRG1,NUP54,PCNP,PEG10,PNPO,PSAP,PSMA2,RAB18,RAP1GAP,RDH11,SARS2,SMAD4,SMARCA5,STAT1,STOML2,TM9SF4,TMA16,UBA5,UBE2M,UBP1,ZBTB11
COPS5		transcription regulator		-1.739		6.65E-10	ADA,ADRM1,AURKB,BAX,CSE1L,FDXR,GSDME,HMOX1,KIF23,MARCKS,MCM2,PAICS,RFC1,SLC7A5,SMC6,STMN1,TBRG4	84 (7)
cisplatin		chemical drug	Activated	2.556		1.13E-09	ACTB,ADRM1,ANXA4,BAX,CCNB1,CEACAM6,CPT1A,CROCC,CTNND1,DDB2,DOCK1,EPHX1,EZH2,FDXR,FN1,FTO,GATAD2B,HMGCS1,HMOX1,LGALS3,LMNA,MARCKS,NAMPT,PHGDH,PROCR,RBP4,RELA,SMAD4,STMN1,SUSD2,TP53I3	109 (16)
CDKN1A		kinase		1.287		1.84E-09	ACTB,ANLN,AURKB,BAX,CCNB1,FN1,HKDC1,ITGAV,KNTC1,LGALS3,MCM2,PHGDH,PSAP,RACGAP1,RFC1,SOD2,STMN1,TP53I3,WDHD1	98 (15)
YAP1		transcription regulator		0.031		2.30E-09	ACAT2,ANLN,AURKB,BAX,BIN1,CCNB1,CDK2,CELF1,CPT1A,FN1,HMGCS1,JAK1,KIF23,LMNA,NDRG1,RELA,RNASEH2C,RPL14,RPL15,RPL24,RPS15A,STAT1,TJP2,UBP1	113 (16)
FOXM1		transcription regulator	Inhibited	-2.285	bias	2.77E-09	ACE2,AURKB,CCNB1,CDK2,EZH2,FN1,ITGAV,KIF23,MFGE8,MUC5AC,RELA,SOD2,SQSTM1,STMN1	106 (19)
MYC		transcription regulator	Inhibited	-2.376		5.00E-09	ACTB,ACTN1,AKAP12,AKT2,ANXA4,ATP5IF1,AURKB,BAX,BIN1,CCNB1,CDK2,CPT1A,CSE1L,DDB2,DDX27,EZH2,FN1,GAA,GLS,HMOX1,IQGAP2,MCM2,MUC5AC,MYO1B,MYO1C,NDRG1,PAICS,PEG10,PFKP,RPL14,RPL15,RPL24,RPS15A,SLC7A5,SMAD4,SOD2,STAT1,STMN1,TP53I3	126 (19)
medroxyprogesterone acetate		chemical drug		0.144		5.31E-09	ALDH2,ANLN,ATP6AP1,BAX,BCAR1,CCNB1,CDK2,CYSTM1,DDB2,DOCK1,FN1,GAA,GLS,GSN,IQGAP2,ITGAV,LMNA,MCM2,OGT,STAT1,STAT5B,TP53I3	130 (19)
ESR2		ligand-dependent nuclear receptor	Inhibited	-2.240		1.12E-08	ACTN1,AKAP12,ANXA4,BIN1,CCT7,CHUK,CTPS1,DDB2,DPYSL3,EZH2,FN1,GLRX,HMGCS1,HPGD,INPP4B,IQGAP2,ITGAV,JAK1,KIF4A,LMNA,MCM2,NDRG1,PLEC,RBP4,RELA,SMAD4,STMN1,TP53I3	117 (18)
8-bromo-cAMP		chemical reagent		0.253	bias	2.20E-08	ALDH2,ATP6AP1,BAX,BCAR1,CCNB1,CDK2,DDB2,DOCK1,FDXR,FN1,GAA,GLS,GSN,HPGD,IQGAP2,ITGAV,ITPR3,MCM2,OGT,STAT1,STAT5B,TP53I3	131 (18)
tamoxifen		chemical drug		1.010		2.68E-08	ABCG2,AGR2,BAX,CDK2,EPHX1,FN1,HEXIM1,HMGCS1,KIF4A,LGALS3,LSS,MUC5AC,NNMT,PHGDH,PSMC3,SLC7A5,SOD2,SQSTM1	130 (19)
E2F1		transcription regulator		-1.456		1.27E-07	ABCG2,AGR2,AURKB,BAX,CCNB1,CDK2,COPS8,CRIP2,CSE1L,CYB5A,DDB2,EZH2,KIF23,MCM2,OGT,POLA2,RACGAP1,SMARCA5,SMARCC1,SOD2,STMN1	98 (15)
trichostatin A		chemical drug		1.466		1.63E-07	ACTB,AKAP12,AKT2,AURKB,BABAM2,BAX,CSE1L,CTPS1,DOCK1,EPHX1,FN1,GLRX,GLS,GSN,HMGCS1,HMOX1,LAGE3,LMNA,MCM2,MYO1B,NDRG1,OGT,PNPLA2,RELA,SMAD4,SMARCC1,SOD2,SQSTM1,STAT5B,STMN1	112 (17)
5-fluorouracil		chemical drug	Activated	2.257		2.88E-07	ACE2,ANXA4,ATP5F1C,BAX,CDK2,COPS8,DDB2,FDXR,GSN,HMOX1,OGT,PROCR,RPL15,RPL24,RPS15A,SERPINB1,SQSTM1	112 (14)
CYLD-AS1		other		-1.134		3.36E-07	ALDH3A1,EPHX1,GLRX,GLS,HMOX1,LGALS3,RELA,SQSTM1
resiquimod		chemical drug		0.640		5.27E-07	ACTB,ADA,ANXA4,ATP5F1C,CTPS1,CYP4F11,HEXIM1,LGALS3,LMNA,MGLL,MYO1C,NAMPT,PSMA2,PSMC3,SOD2,STAT1,STMN1,STOML2	93 (7)
LUCAT1		other		0.816	bias	5.96E-07	ALDH3A1,BAX,FN1,GLRX,MGLL,SOD2	83 (7)
CTNNB1		transcription regulator		-1.761		7.91E-07	ACAT2,ACTB,ADSS2,AKT2,CPT1A,CTSZ,CYB5A,CYB5R3,DDX50,ENO3,FN1,HMGCS1,KIF23,LGALS3,LMNA,MFGE8,NME3,PROCR,PSAP,RAB18,RBP4,RPL14,RPL15,RPL24,RPS15A,SQSTM1,STAT1,STAT5B,SUSD2	126 (19)
NFE2L2		transcription regulator		-1.680		8.03E-07	ABCG2,ACE2,ALDH3A1,CCT7,CPT1A,DDX50,DNAJB11,EPHX1,FN1,GLS,HMGCS1,HMOX1,LMNA,MGLL,OGT,PHGDH,PSMC3,RELA,SOD2,SQSTM1	98 (11)
NPPB		other		0.128		8.82E-07	ACAT2,BAX,FDXR,FN1,HMGCS1,LSS	59 (3)
calcitriol		chemical drug	Activated	2.800		8.82E-07	ACAT2,AGR2,AKAP12,ANLN,BAX,CCNB1,CD38,CEACAM6,CPT1A,CSE1L,EZH2,FN1,GLRX,HPGD,KIF23,MCM2,NUP93,PHGDH,RACGAP1,RELA,SERPINB1,STMN1,TJP2	117 (20)
CST5		other		1.127		9.79E-07	ACAT2,ADRM1,AHCTF1,AKAP12,COPS7A,COPS8,DHX38,DNAJB11,IQGAP2,ITPR3,MRTO4,OTUD4,SLC9A3R2,TOMM22
PML		transcription regulator	Activated	2.008		1.00E-06	ANXA4,BAX,CDK2,CPT1A,HMGCS1,HMOX1,NDRG1,SQSTM1,STAT1,STMN1,UBE2M	121 (21)
metribolone		chemical reagent		-1.256	bias	1.12E-06	ACTN1,ADRM1,AGR2,AKAP12,ATP5F1C,ATP6AP1,BAX,HMGCS1,INPP4B,IQGAP2,MGLL,NDRG1,NDUFV3,NEDD4L,NNMT,PFKP,RDH11,TOMM22,UQCRH	100 (7)
RB1		transcription regulator		1.145		1.49E-06	ACTB,AURKB,BAX,CCNB1,CDK2,DCTN4,DDB2,EZH2,FN1,GADD45GIP1,H1-5,ITGAV,MCM2,MRPL53,OGT,PGRMC1,SMARCA5,SOD2,TOMM22	106 (17)
CEBPB		transcription regulator	Inhibited	-2.226		1.56E-06	ANTXR1,AURKB,CPT1A,CSE1L,CTPS1,CTSC,CYB5A,DDB2,EZH2,FN1,KIF4A,MCM2,PAICS,POLA2,RACGAP1,RFC1,SMC6,SOD2,STAT1,STMN1,TBRG4	103 (16)
decitabine		chemical drug	Activated	2.238		1.76E-06	AKAP12,AKT2,BABAM2,BAX,BICC1,BIN1,CEACAM6,CSE1L,DOCK1,FDXR,FN1,FTO,GLRX,GSN,HPGD,ITGAV,LGALS3,MCM2,MECP2,MYO1B,NDRG1,NECTIN2,OGT,SMAD4,STAT1,STAT5B,TJP2	122 (15)
ATF3		transcription regulator		0.906		2.78E-06	ADA,AURKB,CDK2,CTPS1,GSN,PAICS,PAPSS2,PHGDH,PSPH,TP53I3	81 (7)
HRAS		enzyme				3.31E-06	ACTB,ALDH3A1,ANTXR1,AURKB,BAX,CCNB1,CDK2,CPT1A,CTSC,CTSZ,EPHX1,FN1,GSN,HMOX1,IQGAP2,ITGAV,MFGE8,MYO1C,POLR2M,RAP1GAP,RELA,SMAD4	111 (18)
pirinixic acid		chemical toxicant		-1.576		3.97E-06	ABCG2,ACAT2,ALDH3A1,BAX,CCNB1,CCT7,CDK2,CPT1A,HMGCS1,HMOX1,KPNA1,LGALS3,MARK2,MGLL,PAICS,PSMA2,PSMC3	112 (16)
LCN2		transporter		0.277		4.34E-06	ACTN1,ANLN,BAX,FN1,HMOX1,KIF23,RBP4,SOD2	105 (20)
CLDN7		other	Activated	2.360		4.59E-06	ALDH3A1,CEACAM6,GLS,ITPR3,LGALS3,NNMT,PHGDH,RPP40,SERPINB1
RABL6		other		-1.914		4.63E-06	AURKB,CCNB1,CDK2,EZH2,HMOX1,KIF23,MCM2	91 (11)
UNC1999		chemical reagent				4.72E-06	CCNB1,CDK2,HMOX1,SQSTM1
NRG1		growth factor		0.199		4.99E-06	ACTN1,BIN1,ENO3,FN1,GLS,HMOX1,ITGAV,MARCKS,MGLL,MUC5AC,NDRG1,PHGDH,STMN1	102 (17)
dexamethasone		chemical drug	Activated	2.152		5.10E-06	ACTB,AKAP12,ALDH2,BAX,BCAR1,CD38,CDK2,CEACAM6,CPS1,CTSC,CYB5A,CYSTM1,DCTN6,DPYSL3,FMNL1,FN1,HMOX1,HPGD,ITGAV,ITPR3,JAK1,KIF4A,LAGE3,LGALS3,LSS,MARCKS,MCM2,MELTF,MFGE8,MUC5AC,NAMPT,NDUFV3,NECTIN2,NEDD4L,PFKP,PLEC,PNPLA2,PRPF4B,PSAP,PSMA2,RACGAP1,RBP4,RDH11,RELA,SERPINB1,SOD2,SQSTM1,STAT1	136 (21)
PPARG		ligand-dependent nuclear receptor		-0.681		6.48E-06	ABCG2,BAX,BIN1,CDK2,CPLX2,CPT1A,CTPS1,EPHX1,FN1,HMOX1,LNPEP,MGLL,MRTO4,MUC5AC,NDRG1,RBP4,RELA,STAT5B	117 (19)
E2F8		transcription regulator				6.76E-06	CCNB1,KIF23,MCM2,RACGAP1
Z-LLL-CHO		chemical - protease inhibitor		-0.356		7.38E-06	ABCG2,ACTB,AGR2,BAX,BCAR1,CHUK,DDB2,EZH2,HMOX1,ITPR3,MRTO4,SOD2,SQSTM1,STAT1,STMN1	106 (15)
mir-8		microRNA		0.867	bias	7.49E-06	ABCG2,ACE2,ACTN1,BAX,CPT1A,EZH2,FN1,HMOX1,ITGAV,NECTIN2,SQSTM1	91 (13)
ATF4		transcription regulator		1.048	bias	9.43E-06	ABCG2,CPT1A,FN1,GPATCH1,LGALS3,NDRG1,PHGDH,PSPH,SLC7A5,SOD2,WFS1	79 (8)
antioxidant		group				1.00E-05	BAX,FN1,HMOX1	45 (7)
ERBB2		kinase		-1.819		1.02E-05	ABCG2,ACTB,AGR2,AKAP12,AKT2,CCNB1,CHUK,CPS1,CSE1L,FN1,GLS,GOLPH3,JAK1,LGALS3,LSS,MCM2,NDRG1,NNMT,PAICS,PHGDH,POLA2,PSMC3,RAB18,RAB34,SLC7A5,TP53I3,WFS1	107 (16)
aflatoxin B1		chemical - endogenous non-mammalian		-0.277	bias	1.06E-05	ALDH3A1,ANXA13,AURKB,BAX,KIF23,KNTC1,MFGE8,NDRG1,PHGDH,RACGAP1,RAP1GAP,SERPINB1,STMN1
D-glucose		chemical - endogenous mammalian		0.500		1.40E-05	ACE2,ACTB,ACTN1,ADA,ANLN,BAX,CCNB1,CTSC,DNAJB11,FN1,FTO,GSDME,GSN,HMOX1,ITPR3,NAMPT,OGT,PFKP,RELA,SOD2,SQSTM1,SUSD2	111 (18)
CCNE1		transcription regulator	Inhibited	-2.190	bias	1.63E-05	AKT2,CCNB1,CDK2,DDX27,MCM2	94 (13)
NPC1		transporter		0.672		1.94E-05	ATP6AP1,BIN1,CTSZ,HMGCS1,LGALS3,LSS,MCM2,SQSTM1,STAT1
STX18		transporter		-0.707	bias	2.12E-05	ADA,ANLN,DDB2,DPYSL3,EZH2,GSDME,POLA2,SMARCC1
ERBB3		kinase		0.707		2.26E-05	ACTB,BAX,FN1,GLS,HMOX1,NDRG1,PHGDH,STMN1	109 (16)
ESR1		ligand-dependent nuclear receptor		-0.162		2.68E-05	ABCG2,ADA,AKT2,ANLN,ANXA4,BAX,BIN1,CCNB1,CDK2,CEACAM6,CHMP4A,CPNE1,CTSC,DCBLD2,DDB2,GLRX,GSN,HTRA2,JAK1,KIF23,MARCKS,MUC5AC,PES1,RBP4,RELA,RPL24,SLC7A5,SQSTM1,STAT1,STAT5B,TJP2,TP53I3	128 (18)
TWIST1		transcription regulator		-0.267		2.74E-05	ABCG2,AKT2,BAX,DPYSL3,EZH2,FN1,GSN,LGALS3,LMNA,MFGE8
E2F7		transcription regulator				2.78E-05	CCNB1,KIF23,MCM2,RACGAP1
BHLHE40		transcription regulator		-0.277		3.03E-05	ACTN1,CD38,DCBLD2,EPHX1,GLRX,NAMPT,NDRG1,NUP93,PFKP,PROCR,PSMA2,SOD2,STAT1
EGR1		transcription regulator		-0.287	bias	3.13E-05	BAX,BCAR1,EZH2,FN1,HMOX1,HPGD,NDRG1,PEG10,PNPLA2,SOD2	113 (17)
OGA		enzyme		1.474		3.18E-05	ADRM1,BAX,CDK2,CYP4F11,FN1,GAA,GSN,HMGCS1,HPGD,JAK1,LSS,MGLL,OGT,RBP4,STAT1	106 (12)
sirolimus		chemical drug		1.284		3.26E-05	ACTB,ADA,ADSS2,AGR2,ATP5F1C,AURKB,BAX,FN1,HMOX1,LGALS3,LMNA,PFKP,RELA,RPL15,SLC7A5,SQSTM1,STAT1,STMN1,STX4	122 (18)
PPARA		ligand-dependent nuclear receptor		-0.675		3.28E-05	ACAT2,ALDH2,BAX,CCNB1,CDK2,CPS1,CPT1A,GLS,GSTK1,HMGCS1,HMOX1,KIF4A,LSS,MGLL,PNPLA2,RBP4	81 (13)
CDK19		kinase		-0.113	bias	3.46E-05	BAX,DDB2,EPHX1,FDXR,HMGCS1,HMOX1,LSS,PROCR
arsenic trioxide		chemical drug		0.706		4.39E-05	ACAT2,ATP6AP1,BAX,DNAJB11,FN1,GLRX,HMGCS1,HMOX1,HTRA2,LSS,PRPF4B,RAB18,RELA	107 (16)
NSUN6		enzyme		-0.447	bias	4.39E-05	GLS,MARCKS,NDRG1,PHGDH,STMN1
AGT		growth factor		-0.568		4.66E-05	ACAT2,ACE2,ACTB,BAX,CCNB1,CDK2,FDXR,FN1,GAA,GADD45GIP1,HMGCS1,HMOX1,HSPG2,ITGAV,LGALS3,LNPEP,LSS,MYO1C,NAMPT,NDRG1,RACGAP1,RBP4,RELA,SOD2	128 (20)
gemcitabine		chemical drug				5.12E-05	CCNB1,CPT1A,CTPS1,DCTN4,HMOX1,MCM2,SQSTM1	49 (7)
MDL 73811		chemical reagent	Activated	2.000		5.31E-05	FN1,LGALS3,PSAP,SOD2
TNF		cytokine		0.883		5.45E-05	ABCG2,ACTB,AKAP12,ALDH2,ALDH3A1,BAX,CD38,CDK2,CPT1A,CTSC,CTSZ,DCBLD2,FN1,GLS,GNL1,GSDME,HMOX1,HPGD,HSPG2,ITGAV,JAK1,LGALS3,LSS,MECP2,MUC5AC,MYO1B,NAMPT,NME3,NNMT,PHGDH,PROCR,PSMA2,RELA,SERPINB1,SOD2,SQSTM1,STAT1,STMN1,TJP2,TP53I3,ZBTB11	129 (18)
ampelopsin		chemical drug				5.49E-05	BAX,HMOX1,RELA	103 (16)
methylselenic acid		chemical reagent				5.54E-05	AKT2,CCNB1,CDK2,EPHX1,FN1,INPP4B,JAK1,MCM2,NDRG1,NEDD4L,RDH11	119 (12)
CD38	0.617	enzyme		-0.340	bias	5.56E-05	CRELD2,FN1,LGALS3,NDRG1,NDUFV3,PFKP,RAP1GAP,SLC7A5,SOD2	89 (10)
1,2-dithiol-3-thione		chemical reagent		-0.781	bias	5.62E-05	CCT7,DDX50,DNAJB11,EPHX1,HMOX1,LMNA,MGLL,PSMA2,PSMC3,SOD2	21 (2)
Lh		complex		0.707		6.26E-05	ACTB,ACTN1,AKAP12,ATP5IF1,CHUK,CTNND1,FDXR,PGRMC1,RPL15,RPL24,RPS15A,SOD2,STAT1	96 (10)
SP1		transcription regulator		0.909	bias	6.33E-05	ADA,ADSS2,AKAP12,BAX,CDK2,DDB2,DRG2,FN1,HMOX1,ITGAV,MECP2,MUC5AC,NDRG1,PROCR,RELA,SMARCC1,SOD2,STAT1	108 (17)
AURKB	-1.384	kinase		-1.982		6.44E-05	BAX,DDB2,FDXR,TP53I3	83 (11)
FLCN		other		0.000	bias	6.76E-05	ABCG2,ACE2,CEACAM6,CTSC,CTSZ,HMOX1,PFKP,SOD2	88 (10)
Immunoglobulin		complex		-0.217		7.47E-05	ANTXR1,BAX,BIN1,CDK2,CPT1A,CTSZ,ENO3,EZH2,FN1,FTO,HMOX1,HTRA2,LGALS3,LPGAT1,MUC5AC,NAMPT,NDUFV3,PNPLA2,RELA,SERPINB1,SLC7A5,SOD2,SQSTM1,STAT1,STMN1	110 (17)
CpG ODN 2006		chemical reagent		-1.554		7.84E-05	ACTB,ADA,CTPS1,HEXIM1,LGALS3,MYO1C,PSMA2,PSMC3,RELA,STAT1,STOML2	114 (15)
mir-142		microRNA		0.721		8.06E-05	ABCG2,HMGCS1,INPP4B,ITGAV,PAICS,STAT1,STAT5B
streptozocin		chemical drug		0.061		8.12E-05	ABCG2,BAX,CPT1A,ENO3,FN1,HMOX1,HSPG2,LGALS3,OGT,RELA,SMAD4,SOD2	118 (19)
MAP2K3		kinase		0.000	bias	8.28E-05	ARL1,BAX,MUC5AC,RAB34,RELA,STAT1	105 (12)
MAPT		other				9.09E-05	ABCG2,ACTB,ACTN1,ATP5F1C,CCNB1,CCT7,CLTA,CPLX2,CTSC,CTSZ,DPYSL3,EPHX1,GAA,HMOX1,PLEC,SQSTM1,STMN1,TUBA1C	80 (8)
CREB1		transcription regulator		1.311		9.38E-05	CCNB1,CPT1A,FN1,GAA,GLS,HMGCS1,HMOX1,HPGD,LSS,MUC5AC,MYO1B,PEG10,RBP4,SHTN1,SOD2,SQSTM1,STMN1
CUX1		transcription regulator				9.67E-05	ALDH3A1,CDK2,FTO,H1-5,MARCKS,RACGAP1
CDKN2A		transcription regulator	Activated	2.244		9.81E-05	AURKB,BAX,CCNB1,CDK2,DCTN4,EZH2,FN1,GLS,ITGAV,LGALS3,PHGDH,PSPH,RFC1	95 (14)
eflornithine		chemical drug	Activated	2.186		9.88E-05	CDK2,FN1,LGALS3,PSAP,SOD2	111 (17)
PLPP3		phosphatase				1.02E-04	CTNND1,FN1
AKAP1		other				1.02E-04	BAX,HMOX1	67 (7)
camptothecin		chemical drug		1.414		1.04E-04	AKT2,ANXA4,BAX,C11orf68,CCNB1,CDK2,CTNND1,DDB2,ENO3,IQGAP2,LGALS3,MARK2,MCM2,PLEC,SOD2,STAT5B,TOR1AIP1,TP53I3	109 (15)
AGN194204		chemical drug		0.000		1.08E-04	ACAT2,CCNB1,CPT1A,CYB5A,ENO3,EZH2,KIF4A,LMNA,LSS,STAT5B	45 (3)
KLF6		transcription regulator		0.714		1.20E-04	ADRM1,CD38,CYB5A,DCBLD2,HMOX1,LGALS3,NAMPT,PFKP,PSMA2,SOD2,SQSTM1	91 (7)
silibinin		chemical drug		0.140	bias	1.21E-04	BAX,CCNB1,CD38,CDK2,FN1,MUC5AC	110 (19)
BRCA1		transcription regulator		0.199		1.21E-04	ACTB,BAX,CCNB1,DDB2,HMOX1,JAK1,STAT1,STAT5B,TP53I3	105 (15)
PD98059		chemical - kinase inhibitor		0.019		1.25E-04	ACAT2,AKAP12,BAX,CCNB1,CDK2,DCBLD2,FN1,HMOX1,HPGD,ITGAV,LPGAT1,MGLL,MUC5AC,PLEC,RELA,SMAD4,ZNF143	120 (17)
resveratrol		chemical drug		-0.764		1.27E-04	BAX,CCNB1,CDK2,CHUK,CPT1A,FN1,GSTK1,HMOX1,MUC5AC,RELA,SOD2,SQSTM1	101 (17)
IL4		cytokine		1.083		1.36E-04	ACTB,ADRM1,ALDH2,ANXA4,BAX,BIN1,CD38,CDK2,CTSC,CYB5A,EPHX1,FN1,HPGD,HTRA2,ITGAV,JAK1,LAS1L,LGALS3,NDRG1,PFKP,PLEC,PSMA2,RELA,SLC7A5,SQSTM1,STAT1,STAT5B,TJP2	114 (17)
ethanol		chemical - endogenous mammalian		0.587		1.42E-04	BAX,CHUK,CPT1A,CYB5A,EPHX1,EZH2,HMOX1,IQGAP2,LSS,PNPLA2,RELA,SH3BGRL,SOD2,STAT1,STAT5B,ZPR1	103 (16)
FOXO1		transcription regulator		0.820		1.45E-04	ANLN,BAX,CCNB1,CPT1A,FN1,GSTK1,HMOX1,ITGAV,NAMPT,PNPLA2,RELA,SERPINB1,SMAD4,SOD2,STAT5B	121 (19)
CHI3L1		enzyme				1.49E-04	NAMPT,NNMT,PEG10,SERPINB1
HTT		transcription regulator				1.49E-04	ACAT2,AKAP12,AKT2,CDK2,CHUK,CPLX2,DDX50,ENO3,FN1,GSN,HMGCS1,HTRA2,RAP1GAP,RBP4,RELA,SOD2,SQSTM1,STMN1,STX4	106 (17)
dihydrotestosterone		chemical - endogenous mammalian		-0.126		1.52E-04	ACTB,BAX,BCAR1,CCNB1,CDK2,CPT1A,EZH2,FN1,GSN,HPGD,IQGAP2,KPNA1,MGLL,NDRG1,NEDD4L,PHGDH,RELA,SMARCC1	128 (20)
MFAP4		other				1.58E-04	FN1,RELA,SMAD4
TXN		enzyme		-0.849		1.62E-04	CD38,HMOX1,MUC5AC,RELA,SOD2	121 (17)
pifithrin alpha		chemical reagent		0.000		1.72E-04	BAX,HMOX1,RELA,SQSTM1	101 (15)
N-Ac-Leu-Leu-norleucinal		chemical - protease inhibitor		-0.816		1.72E-04	BAX,BCAR1,CCNB1,ITPR3,SMAD4,STMN1	108 (18)
TP63		transcription regulator		0.852		1.78E-04	ADA,ADRM1,AGR2,ALDH3A1,BAX,CCNB1,DDB2,FDXR,FN1,HSPG2,KIF23,MFGE8,RACGAP1,RELA,SMAD4,STMN1,TP53I3	94 (14)
UBQLN2		other				1.78E-04	ADRM1,HSPG2,PEG10,PSMC3,SQSTM1
SMARCA4		transcription regulator		0.835	bias	1.83E-04	ACE2,AGR2,ALDH2,BIN1,CDK2,CEACAM6,CPS1,ENO3,FN1,H1-10,HKDC1,HPGD,ITGAV,LGALS3,LMNA,MELTF,MFGE8,SMARCC1
MAPK1		kinase		-0.829		1.84E-04	AKAP12,CCNB1,ENO3,FN1,GLS,HMOX1,ITGAV,LGALS3,LMNA,MECP2,MUC5AC,SMARCC1,STAT1	118 (17)
ZBTB17		transcription regulator				1.84E-04	ANLN,AURKB,CCNB1,DDB2,KIF4A,RACGAP1	91 (13)
let-7		microRNA	Activated	2.067	bias	1.88E-04	AURKB,CCNB1,EZH2,FN1,HMOX1,MCM2,MRTO4,PAICS,RELA,SMAD4	86 (10)
imatinib		chemical drug		1.644		1.98E-04	ATP6AP1,BAX,CCNB1,CDK2,DNAJB11,FN1,HMOX1,HTRA2,JAK1,PRPF4B,RAB18,STAT1	104 (15)
mesalamine		chemical drug				2.09E-04	HMOX1,HPGD,SOD2	115 (19)
trehalose		chemical - endogenous mammalian				2.09E-04	BAX,NAMPT,SQSTM1	75 (7)
2,3-bis(4-hydroxyphenyl)-propionitrile		chemical reagent		-1.264		2.13E-04	BAX,CCNB1,HMGCS1,HMOX1,INPP4B	19 (2)
lactacystin		chemical - protease inhibitor	Inhibited	-2.359		2.17E-04	ACTB,BCAR1,CYB5A,HMOX1,MRTO4,SH3BGRL,SMAD4,SQSTM1,STMN1	92 (11)
TP73		transcription regulator		1.836		2.19E-04	ADA,BAX,BCAR1,CCNB1,CDK2,FDXR,FN1,GSN,KIF23,NDRG1,NECTIN2,PLEC,PROCR,STMN1,TP53I3	101 (15)
LAMP2		enzyme		0.831		2.27E-04	CTSC,FN1,ITGAV,STAT1	118 (19)
MAFB		transcription regulator		0.570		2.34E-04	ACTB,ACTN1,ADA,CD38,LGALS3,MARCKS,RBP4
AICAR		chemical - endogenous mammalian		0.863		2.34E-04	BAX,CCNB1,FN1,PNPLA2,SOD2,SQSTM1,TP53I3	121 (21)
apigenin		chemical - endogenous non-mammalian		0.000		2.40E-04	BAX,CDK2,HMOX1,MUC5AC,RELA,SOD2	115 (20)
APP		other		0.910		2.45E-04	ABCG2,ACTB,ATP5F1C,BAX,BIN1,CCNB1,CDK2,CLTA,CPLX2,FN1,HMOX1,HSPG2,ITPR3,LGALS3,MECP2,NAMPT,PFKP,PSMC3,RELA,SOD2,SQSTM1,STMN1,TUBA1C	112 (17)
forskolin		chemical toxicant		0.964		2.54E-04	ACTB,ACTN1,AKAP12,ALDH3A1,CCNB1,CTNND1,EZH2,FDXR,FN1,HMOX1,HPGD,ITPR3,MACROD1,MFGE8,NAMPT,PEG10,PGRMC1,SOD2,STAT1	123 (20)
enalapril		biologic drug		-0.776		2.55E-04	ACE2,FN1,HMOX1,LGALS3,MFGE8,SOD2	71 (6)
cinnamaldehyde		chemical toxicant		-0.054		2.55E-04	CPT1A,HMOX1,PNPLA2,SMAD4,SOD2,SQSTM1	109 (11)
carbon tetrachloride		chemical toxicant		0.711		2.60E-04	BAX,CD38,CPS1,FN1,GSTK1,HMOX1,MGLL,RELA,SMAD4,SOD2	105 (17)
nitric oxide		chemical - endogenous mammalian		0.673		2.62E-04	BAX,DPYSL3,HMOX1,HSPG2,NDRG1,SMARCC1,SQSTM1,TP53I3	114 (18)
PDGF BB		complex		0.771		2.64E-04	ACAT2,AKAP12,AKT2,CDK2,DCBLD2,FN1,HMGCS1,HMOX1,LGALS3,LMNA,NAMPT,SOD2	94 (15)
NFKBIA		transcription regulator		-1.373		2.72E-04	AURKB,BAX,CCNB1,CDK2,CTSZ,FN1,HMOX1,ITGAV,MFGE8,MPDU1,MUC5AC,RELA,SMAD4,SOD2	118 (21)
INSR		kinase		-1.746		2.75E-04	AGR2,ALDH2,CPT1A,DCTN4,FTO,HMGCS1,HPGD,LSS,MCM2,NAMPT,NDRG1,PNPLA2,RAB18,SERPINB1,SEZ6L2,SMAD4	51 (7)
Eldr		other		-1.342	bias	2.76E-04	ANLN,AURKB,CCNB1,KIF23,KIF4A
IL1		group		0.492		2.78E-04	ABCG2,ALDH3A1,BAX,CEACAM6,CPT1A,CTSC,FN1,GLS,HMOX1,RBP4,RELA,SOD2	107 (18)
etoposide		chemical drug		0.743		2.86E-04	BAX,BIN1,CCNB1,CROCC,MCM2,RELA,SOD2,SQSTM1,STAT1,TP53I3	108 (18)
Akt		group		0.135		2.91E-04	BAX,CPT1A,EZH2,FN1,GSTK1,HMOX1,HPGD,HSPG2,LMNA,NDRG1,RELA,SLC7A5,SOD2	107 (15)
nitrofurantoin		chemical drug		1.463		2.97E-04	ACTB,BAX,CPS1,CPT1A,HMGCS1,HMOX1,LGALS3,STMN1
mir-21		microRNA	Activated	2.365		3.00E-04	ANLN,CCNB1,CSE1L,FN1,KIF23,KIF4A,KNTC1,PPP2R5E,RACGAP1,SOD2,STAT1,STMN1
E2f		group	Inhibited	-2.424	bias	3.00E-04	CCNB1,CDK2,KNTC1,MCM2,PGRMC1,POLA2,STMN1	77 (8)
EGFR		kinase		0.039		3.03E-04	ABCG2,ACTB,ADSS2,AHCTF1,BAX,CCT5,CDK2,CELF1,FN1,IQGAP2,MARCKS,MUC5AC,PEG10,RELA,SLC7A5,SMARCC1	126 (16)
dibenzo[a,l]pyrene diol-epoxide		chemical - endogenous mammalian				3.03E-04	CTNND1,RELA
KLHL42		enzyme				3.03E-04	FN1,PPP2R5E
proTAME		chemical reagent				3.03E-04	ANLN,CCNB1
EPAS1		transcription regulator		0.767	bias	3.14E-04	ABCG2,AKAP12,FN1,GLS,HMGCS1,ITGAV,NAMPT,NDRG1,SLC7A5,SOD2	90 (13)
ALDH2	0.505	enzyme		0.152		3.30E-04	FN1,PHGDH,PSPH,SLC7A5
imipramine blue		chemical drug		1.982		3.30E-04	CCNB1,CDK2,SOD2,STMN1
D-galactose		chemical - endogenous mammalian				3.41E-04	BAX,RELA,SOD2
SMOC2		other				3.41E-04	AURKB,CCNB1,FN1
COL9A1		other				3.41E-04	FN1,HSPG2,MFGE8
TSC2		other		1.012		3.48E-04	BAX,GSN,HMOX1,LGALS3,PSMC3,RELA,SOD2,STAT1	90 (15)
H89		chemical drug		0.346		3.48E-04	ADSS2,BAX,EZH2,HMOX1,ITPR3,MUC5AC,RELA,SOD2	109 (16)
HSF1		transcription regulator		0.000		3.54E-04	BAX,CCT5,CCT7,HMOX1,KNTC1,LMAN2L,MCM2,PNPLA2,POLA2,RELA	52 (7)
IKBKB		kinase		0.832		3.57E-04	AURKB,BAX,CCNB1,CDK2,CTSZ,EZH2,HMOX1,KIF23,MUC5AC,RELA,SOD2	108 (19)
MITF		transcription regulator		-1.320	bias	3.65E-04	AURKB,CCNB1,CDK2,FN1,HPGD,INPP4B,KIF4A,LGALS3,MCM2,SHTN1	85 (8)
SCAP		other		-1.342	bias	3.66E-04	CYB5A,HMGCS1,LGALS3,LSS,RDH11,SQSTM1	28 (4)
IL10		cytokine		-0.036		3.75E-04	BAX,CHUK,CTSC,CTSZ,HMOX1,HPGD,MCM2,MUC5AC,PHGDH,PSAP,RAB34,SLC7A5,SLC9A3R2,STAT1	114 (17)
LAS1L	-0.441	other		-0.447		3.79E-04	BAX,CPT1A,INPP4B,SUSD2,TP53I3
NRAS		enzyme		-0.956		3.82E-04	AKAP12,ANXA4,BAX,CCNB1,EPHX1,FN1,PCBD2,POLR2M,STAT1	109 (14)
CSF2		cytokine		0.080	bias	4.01E-04	ADA,ANLN,BAX,CCNB1,CD38,CTSC,GADD45GIP1,HMOX1,KNTC1,PHGDH,RACGAP1,RELA,SOD2,SQSTM1,STMN1	111 (17)
3-methyladenine		chemical toxicant		0.871		4.09E-04	AGR2,BAX,CCNB1,HMOX1,SQSTM1	108 (17)
ZBTB7A		transcription regulator				4.16E-04	ADA,CDK2,PFKP,RELA	105 (11)
ANGPT2		growth factor		-0.022	bias	4.22E-04	ADA,APIP,CCT7,FN1,HMGCS1,HMOX1,MFGE8,RFC1,SOD2	88 (10)
monorden		chemical - endogenous non-mammalian				4.24E-04	BAX,GSN,MUC5AC	89 (9)
berberine		chemical drug		-1.044		4.36E-04	BAX,CDK2,CPT1A,FN1,GLS,HMOX1,RELA	119 (19)
SIX2		transcription regulator		1.342		4.41E-04	AKT2,ALDH2,CCNB1,MCM2,RNASEH2C
PLX5622		chemical drug		0.000		4.49E-04	ACTB,BAX,FN1,GAA,HSPG2,MECP2,MFGE8,NAMPT,PGRMC1,STAT1
COL5A1		other		-0.083	bias	4.64E-04	CTSC,FN1,ITGAV,LGALS3
SFTPC		other				4.64E-04	BAX,LGALS3,MUC5AC,PSMC3
GLI1		transcription regulator		-0.966		4.68E-04	ABCG2,ALDH3A1,BAX,CDK2,CEACAM6,CTPS1,DRG2,HPGD,IQGAP2,LMNA,MUC5AC,PAPSS2,PCBD2,RAB34,RPP40
PGR		ligand-dependent nuclear receptor		0.285		4.70E-04	ABCG2,CCNB1,FN1,GLS,HPGD,HSPG2,NDRG1,PAPSS2,PFKP,PGRMC1,SLC7A5,STAT1,STAT5B,STMN1	133 (18)
doxorubicin		chemical drug		0.929		4.77E-04	ABCG2,AURKB,BAX,CCNB1,CDK2,HMOX1,LGALS3,NDRG1,PSAP,RELA,SMAD4,SOD2,STAT1,STMN1,TP53I3	106 (16)
VDR		transcription regulator		0.792		4.89E-04	AGR2,AKT2,ANLN,BAX,CCNB1,CD38,CPT1A,EZH2,PNPLA2,RELA	99 (15)
palmitic acid		chemical - endogenous mammalian		0.852		5.03E-04	BAX,CPT1A,FN1,HMOX1,PCNP,PNPLA2,PROCR,PSMC3,RELA,SMAD4,SQSTM1	102 (14)
mir-3622		microRNA				5.17E-04	BAX,CCNB1,TP53I3
10-nitrooleate		chemical - endogenous mammalian				5.17E-04	MFGE8,MUC5AC,RELA
costunolide		chemical - endogenous non-mammalian				5.17E-04	BAX,CCNB1,RELA	67 (7)
torkinib		chemical drug		1.510		5.48E-04	AURKB,CCNB1,CDK2,CPT1A,HEXIM1,POLA2,SERPINB1,SOD2
ETV4		transcription regulator				5.73E-04	BAX,FN1,HPGD,PLEC
E2F4		transcription regulator				6.00E-04	ANLN,AURKB,CDK2,KIF4A,MRTO4,PGRMC1,POLA2,SMARCA5,STMN1
PH755		chemical reagent				6.02E-04	PHGDH,PSPH
Bvr		group				6.02E-04	HMOX1,RELA
SNHG1		other				6.02E-04	BAX,CCNB1
SAPCD2		other				6.02E-04	CCNB1,CDK2	22 (4)
TEX11		other				6.02E-04	BAX,CCNB1
MAF1		other				6.02E-04	ACTB,NNMT
glucuronyl glucosamine glycan sulfate		chemical drug				6.02E-04	FN1,HSPG2
CTNNAL1		other				6.02E-04	FN1,ITGAV
NOC2L		transcription regulator				6.02E-04	BAX,TP53I3
DEETGE-CAL-Tat		chemical reagent				6.02E-04	HMOX1,SOD2
karenitecin		chemical drug				6.02E-04	CCNB1,CDK2
ibrutinib		chemical drug		1.134	bias	6.17E-04	GLS,MGLL,MRTO4,PES1,RELA,RRP9,TBRG4
doxifluridine		chemical drug				6.24E-04	BAX,FDXR,TP53I3
PURPL		other				6.24E-04	RACGAP1,RFC1,SQSTM1
IL19		cytokine				6.24E-04	CCNB1,FN1,HMOX1	44 (7)
KRAS		enzyme		0.277		6.25E-04	AHCTF1,AURKB,CCNB1,CCT5,CSE1L,EZH2,FN1,GSN,HEXIM1,HMOX1,HSPG2,IQGAP2,JAK1,LGALS3,MUC5AC,PCNP,RELA,SH3BGRL,SQSTM1,STAT1,ZPR1	106 (17)
GnRH analog		biologic drug		0.102		6.30E-04	ACTN1,BABAM2,CLTA,CRIP2,CYB5A,FN1,HEBP2,ITPR3,NDRG1,RELA,UBE2M
IGFBP3		other		0.865		6.33E-04	BAX,CD38,SMAD4,STAT1	104 (12)
ADRB		group		1.890		6.43E-04	ACAT2,BAX,HMGCS1,HMOX1,LSS,SLC9A3R2,SQSTM1	89 (7)
troglitazone		chemical drug		0.155		6.58E-04	ABCG2,BAX,CCNB1,CDK2,CEACAM6,FN1,HMOX1,NDRG1,NNMT,PLEC,RACGAP1,RELA	124 (18)
ONECUT1		transcription regulator				6.64E-04	ALDH3A1,APIP,ARL1,BCAR1,CDK2,COPS7A,DDB2,ITGAV,SH3BGRL,SMARCC1
tyrphostin AG490		chemical drug		-0.277	bias	6.65E-04	BAX,FTO,HPGD,SOD2,SQSTM1,STAT1	113 (18)
ALOX15		enzyme		0.728		6.98E-04	BAX,FN1,HMOX1,MUC5AC	110 (16)
ETS1		transcription regulator		-0.165		6.99E-04	BAX,CDK2,CHUK,FN1,HMOX1,HPGD,JAK1,MUC5AC,PEG10	95 (13)
NAMPT	0.427	cytokine		1.706	bias	6.99E-04	CDK2,FN1,HMOX1,HPGD,NAMPT,PEG10	112 (17)
hydrogen peroxide		chemical - endogenous mammalian	Activated	2.454		7.28E-04	ACAT2,BAX,CCNB1,CDK2,EZH2,FDXR,FN1,GLRX,HMOX1,MCM2,MUC5AC,RELA,SOD2,STMN1,UQCRH	110 (18)
LMO2		transcription regulator		-1.265		7.39E-04	ACTB,GSDME,GSN,HEXIM1,MFGE8,MGLL,NDRG1,SOD2,SQSTM1,UBA5
tunicamycin		chemical - endogenous non-mammalian		-0.236		7.39E-04	ABCG2,BAX,CPT1A,DNAJB11,FN1,HMOX1,NDRG1,NEDD4L,UBA5,WFS1	106 (15)
NR1H3		ligand-dependent nuclear receptor				7.42E-04	ANLN,AURKB,CCNB1,CD38,CTSC,KIF23,KIF4A,KNTC1,MFGE8
SYVN1		transporter		-1.890	bias	7.58E-04	ATP6AP1,CTPS1,ITGAV,PNPLA2,PSMC3,RAB34,SLC7A5
miR-124-3p (and other miRNAs w/seed AAGGCAC)		mature microRNA		-0.506	bias	7.64E-04	CDK2,CTNND1,GSN,HEBP2,LGALS3,PAPSS2,RELA,SQSTM1,TJP2
thapsigargin		chemical toxicant		-0.656		7.64E-04	ABCG2,BAX,CPT1A,FN1,HMOX1,KPNA1,NEDD4L,UBA5,WFS1	104 (15)
miR-9-5p (and other miRNAs w/seed CUUUGGU)		mature microRNA		0.625	bias	8.15E-04	ALDH2,ATP5F1C,CPT1A,FN1,JAK1
cuprizone		chemical toxicant		0.000		8.20E-04	ANLN,CTSZ,EPHX1,GSN,HMGCS1,LGALS3,SH3BGRL	32 (4)
JUN		transcription regulator		0.715		8.26E-04	ACAT2,AKAP12,BAX,FN1,HMOX1,HPGD,ITGAV,LGALS3,LMNA,NAMPT,NDRG1,SOD2,STAT1,STMN1	123 (18)
acetaminophen		chemical drug		-1.131		8.35E-04	ABCG2,ACTB,CPS1,EPHX1,GLRX,GLS,HMGCS1,HMOX1,PNPLA2	58 (8)
chloropromazine		chemical drug				8.41E-04	ACAT2,HMGCS1,LSS,RDH11
IFNG		cytokine		1.651		8.42E-04	ACE2,ACTB,BAX,CD38,CDK2,CSE1L,CTSC,CTSZ,CYB5A,DDB2,FN1,GLS,GNL1,HMGCS1,HMOX1,HSPG2,ITGAV,KIF23,LGALS3,NAMPT,PHGDH,PSMA2,PTGES2,RELA,SLC7A5,SMAD4,SOD2,SQSTM1,STAT1,ZPR1	120 (19)
vorinostat		chemical drug	Activated	2.566		8.43E-04	BAX,CCNB1,CDK2,HMGCS1,HPGD,LSS,MCM2,MFGE8,NDRG1,RELA	104 (17)
TAFAZZIN		enzyme	Inhibited	-2.484		8.65E-04	ADRM1,BAX,CCNB1,COPS7A,FN1,HECTD1,HMOX1,NLRP2,SERPINB1,STAT1	51 (8)
KDM3B		enzyme		0.447	bias	8.68E-04	FN1,NEDD4L,RACGAP1,RDH11,STMN1
MIR101		group				8.75E-04	EZH2,OGT,STMN1
SLC29A1		transporter				8.75E-04	BAX,FDXR,TP53I3
superoxide		chemical - endogenous mammalian				8.75E-04	FN1,HMOX1,SOD2	96 (12)
LDB1		transcription regulator		-1.265		9.10E-04	ACTB,GSDME,GSN,HEXIM1,MFGE8,MGLL,NDRG1,SOD2,SQSTM1,UBA5
LDLR		transporter				9.11E-04	ANLN,AURKB,CCNB1,CTSC,HSPG2,KIF23,KIF4A,KNTC1,MFGE8
methylprednisolone		chemical drug		-0.770		9.14E-04	ATP5F1C,ATP5IF1,CD38,CHUK,CPS1,CTSC,EPHX1,FN1,GSTK1,HMOX1,MED4,MYO1B,NDUFV3,SERPINB1,STAT1,TUBA1C	52 (7)
PTEN		phosphatase	Activated	2.198		9.34E-04	AURKB,BAX,CCNB1,CLTA,CTSZ,EZH2,FN1,HMGCS1,ITPR3,LGALS3,LSS,NDRG1,OGT,PHGDH,PLEC,SMAD4,STAT5B,TMA16	100 (17)
IL6		cytokine		-1.126		9.54E-04	ABCG2,BAX,CCNB1,CD38,CDK2,CPS1,CTSC,EZH2,FN1,GLRX,HMOX1,HPGD,ITGAV,JAK1,MACROD1,NAMPT,SMAD4,SOD2,STAT1	121 (18)
TLR9		transmembrane receptor		-0.378	bias	9.64E-04	BAX,CCNB1,CD38,CDK2,HMOX1,NAMPT,PROCR,RELA,STAT1	118 (18)
SPDEF		transcription regulator		0.277		9.81E-04	AGR2,MUC5AC,SMAD4,SQSTM1,STMN1
ATM		kinase				9.81E-04	ACTB,BAX,FDXR,FN1,HMOX1	109 (18)
cadmium		chemical toxicant		-0.340		9.81E-04	BAX,CYB5A,EPHX1,HMOX1,LGALS3	103 (15)
NLRP3		enzyme		-0.816		9.95E-04	AKT2,CDK2,DDB2,FN1,HMOX1,SOD2,STAT1	112 (18)
ETHE1		enzyme				9.96E-04	BAX,TP53I3
C1GALT1		enzyme				9.96E-04	BAX,MUC5AC
GLS	0.501	enzyme				9.96E-04	FN1,GLS
PPP1R13B		phosphatase				9.96E-04	BAX,TP53I3
geraniol		chemical - endogenous non-mammalian				9.96E-04	CCNB1,CDK2
ozone		chemical toxicant		0.293	bias	1.00E-03	AGR2,HMOX1,MUC5AC,RELA	99 (14)
topotecan		chemical drug		0.046		1.04E-03	ABCG2,ACTB,AKAP12,CCNB1,CHUK,CYB5A,PTGES2,RELA,SLC7A5,TP53I3,TRIR	81 (7)
TBX2		transcription regulator		-1.342		1.04E-03	ANLN,AURKB,CCNB1,EZH2,MCM2	91 (10)
ERK		group		-0.625		1.05E-03	ACTN1,BAX,EZH2,FN1,HMOX1,ITGAV,MUC5AC,NDRG1,STAT1	117 (18)
LGALS3	0.510	other		-0.415		1.08E-03	BAX,FN1,ITGAV,ITPR3,MUC5AC,PNPLA2	126 (20)
FSH		complex		1.109		1.08E-03	ACTB,ACTN1,AKAP12,ATP5IF1,CHUK,CTNND1,FDXR,PGRMC1,RAP1GAP,SMAD4,STAT1,STX4	106 (7)
IRF4		transcription regulator	Activated	2.138		1.08E-03	ADA,CCNB1,CDK2,CLTA,INPP4B,PROCR,PSMA2,STAT1
pioglitazone		chemical drug		1.510		1.08E-03	ACE2,BAX,FN1,HMOX1,HPGD,RBP4,SOD2,STAT5B	101 (17)
thymoquinone		chemical drug				1.09E-03	BAX,CDK2,CHUK,HMOX1	101 (15)
ZNF106		other		-0.927		1.09E-03	ALDH3A1,GADD45GIP1,GLRX,LGALS3
TRIB3		kinase		-1.114		1.09E-03	ACTB,JAK1,PSPH,SQSTM1
2-amino-1-methyl-6-phenylimidazo-4-5-b-pyridine		chemical toxicant		-1.000	bias	1.09E-03	BAX,CCT5,CCT7,PSMA2
JAK2		kinase				1.11E-03	ACTB,ACTN1,AKAP12,BAX,CPLX2,FN1,STAT1	112 (17)
4-phenylbutyric acid		chemical - endogenous mammalian		-0.640		1.12E-03	EPHX1,GSN,PCNP,PSMC3,RELA,SOD2
JUNB		transcription regulator		0.218	bias	1.16E-03	ACAT2,FN1,HMOX1,HPGD,ITGAV,NAMPT,PNPLA2	104 (10)
FOXA2		transcription regulator		-0.267		1.16E-03	ABCG2,ADA,AGR2,CPT1A,EPHX1,HKDC1,HPGD,MUC5AC,PFKP,RELA,TECR	14 (2)
diphenyleneiodonium		chemical reagent		-1.066	bias	1.17E-03	FN1,HMOX1,MUC5AC,RELA,SOD2	99 (17)
ciprofloxacin		chemical drug		0.000		1.18E-03	ACTN1,ALDH2,ATP5F1C,CPNE1,MFGE8,PSAP
GSK3A		kinase				1.18E-03	BAX,FTO,SQSTM1
l-asparaginase		biologic drug		1.633	bias	1.23E-03	AURKB,HMGCS1,KIF4A,KNTC1,MCM2,PHGDH
CSF1		cytokine		-1.977		1.24E-03	BAX,CCNB1,CDK2,FN1,GLS,HMGCS1,HPGD,ITGAV,LSS,SLC7A5,STAT1	98 (14)
BCR (complex)		complex		-0.707	bias	1.29E-03	CDK2,GLS,JAK1,MRTO4,NAMPT,PES1,RELA,RRP9,STAT1,TBRG4	96 (14)
TCF3		transcription regulator		1.530		1.32E-03	ADA,ANLN,CCNB1,CRELD2,DOCK1,KIF4A,PFKP,PSAP,RACGAP1,SERPINB1,SLC7A5,SMARCC1
MTDH		transcription regulator		0.378		1.33E-03	ACTB,ACTN1,BCAR1,GSN,HMOX1,LGALS3,MGLL
ARID1A		transcription regulator				1.34E-03	ABCG2,ACTN1,CEACAM6,DPYSL3,FN1,GSDME,HECTD1,SRP72,TBCE
BTK		kinase		-0.218	bias	1.34E-03	CD38,CDK2,HMOX1,ITGAV,RELA,STAT1	106 (16)
SP2509		chemical reagent	Activated	3.130		1.35E-03	AKT2,BABAM2,CSE1L,DOCK1,FN1,MCM2,MYO1B,OGT,SMAD4,STAT5B
VEGFA		growth factor		-0.112	bias	1.38E-03	ALDH2,BAX,FN1,HMOX1,ITGAV,LMNA,PNPLA2,SOD2,TJP2,TOMM22	109 (16)
RNF187		enzyme		-0.600	bias	1.39E-03	BAX,HMOX1,SOD2,STAT1,TP53I3	91 (9)
ADRA1D		G-protein coupled receptor				1.40E-03	CCNB1,CDK2,FN1,POLA2
hydroxyurea		chemical drug		0.346	bias	1.46E-03	BAX,CCNB1,MARCKS,MCM2,POLA2,STAT1	116 (21)
NQO1-DT		other				1.48E-03	ALDH3A1,HMGCS1
conduritol epoxide		chemical reagent				1.48E-03	CTSZ,GSN
hesperidin		chemical drug				1.48E-03	BAX,HMOX1	93 (12)
Atg5		other				1.48E-03	BAX,SQSTM1
Snhg20		other				1.48E-03	FN1,LGALS3
PMVK		kinase				1.48E-03	BAX,FDXR
CYP26B1		enzyme				1.48E-03	ITPR3,RBP4
CSE1L	-0.376	transporter				1.48E-03	CCNB1,TP53I3
APOBEC3B		enzyme				1.48E-03	CCNB1,RELA
venetoclax		chemical drug				1.48E-03	BAX,GSDME
C1QTNF2		other				1.48E-03	MGLL,PNPLA2
CBLC		enzyme				1.48E-03	HMOX1,SQSTM1
PAXIP1		other				1.48E-03	CRIP2,ENO3
MIA-459		chemical reagent				1.48E-03	BAX,RELA
MIA-313		chemical reagent				1.48E-03	BAX,RELA
dec-RRLL-cmk		chemical reagent				1.48E-03	FN1,HMGCS1	9 (2)
liproxstatin-1		chemical reagent				1.48E-03	BAX,GSDME
propyl-2-(8-(3,4-difluorobenzyl)-2',5'-dioxo-8-azaspiro[bicyclo[3.2.1] octane-3,4'-imidazolidine]-1'-yl)acetate		chemical reagent				1.48E-03	CCNB1,CDK2
WT1		transcription regulator		1.477		1.49E-03	ACTN1,GSN,HSPG2,KPNA1,LGALS3,LSS,NDRG1,SQSTM1,TMA16
GABA		chemical - endogenous mammalian		1.155	bias	1.55E-03	ACTB,ATP6AP1,FN1,GAA,MCM2,NME3,NUP93,PAPSS2,PSAP,RPL15,TUBA1C,UBE2M
oxymatrine		chemical drug				1.55E-03	BAX,FN1,HMOX1	73 (8)
ACTB	-0.907	other				1.55E-03	AURKB,RACGAP1,STMN1
Rb		group				1.63E-03	AURKB,CCNB1,CDK2,EZH2,SOD2	93 (14)
TRAF2		enzyme		-1.231		1.63E-03	ANXA4,AURKB,CCNB1,NDRG1,RELA	87 (8)
tazemetostat		chemical drug	Activated	3.130		1.67E-03	AKT2,BABAM2,CSE1L,DOCK1,FN1,MCM2,MYO1B,OGT,SMAD4,STAT5B
fenofibrate		chemical drug		-0.248		1.70E-03	CPT1A,HMOX1,KPNA1,MARK2,MGLL,PAICS,PNPLA2,RELA,SOD2	94 (14)
rosiglitazone		chemical drug		-0.495		1.71E-03	ADA,BAX,CPT1A,FN1,HMOX1,HPGD,LNPEP,MGLL,NDUFV3,PNPLA2,RBP4,SOD2,STAT1	117 (19)
TIMP3		other		0.762		1.75E-03	JAK1,MUC5AC,SMAD4,STAT1	44 (7)
SNAI1		transcription regulator		0.593		1.76E-03	ACTN1,CDK2,DPYSL3,FN1,GSN,HPGD,PFKP	97 (10)
BRD7		transcription regulator				1.76E-03	BAX,FN1,NDRG1
LY294002		chemical drug		0.330	bias	1.81E-03	ABCG2,BAX,CCNB1,CD38,CDK2,FN1,HEXIM1,HMGCS1,HMOX1,INPP4B,ITGAV,LMNA,NDRG1,RELA	114 (17)
MAP2K5		kinase				1.88E-03	BCAR1,HMGCS1,LSS,RDH11
ADRA1A		G-protein coupled receptor				1.88E-03	CCNB1,CDK2,FN1,POLA2
PP2/AG1879 tyrosine kinase inhibitor		chemical drug		-0.130		1.90E-03	CD38,FN1,HMOX1,RELA,SOD2	120 (17)
APOE		transporter		0.849		1.97E-03	ACTB,BAX,CPT1A,HMOX1,HSPG2,JAK1,MYO1B,PPP2R5E,RELA,SOD2,STAT1	103 (16)
CDH2		other				1.99E-03	CTNND1,FN1,NDRG1	96 (12)
aphidicolin		chemical toxicant				1.99E-03	BAX,CCNB1,STAT1	85 (6)
pidnarulex		chemical drug		1.342		2.00E-03	BAX,DDB2,TP53I3,WFS1,ZCRB1
melatonin		chemical - endogenous mammalian		-0.126		2.01E-03	BAX,HMOX1,HPGD,RELA,SMAD4,SOD2,SQSTM1	104 (18)
miR-328-3p (and other miRNAs w/seed UGGCCCU)		mature microRNA				2.06E-03	ABCG2,AURKB
CDC20		other				2.06E-03	BAX,CCNB1	85 (9)
3-hydroxykynurenamine		chemical - endogenous mammalian				2.06E-03	RELA,STAT1
adiporon		chemical reagent				2.06E-03	MGLL,PNPLA2
Histone h3		group				2.07E-03	AKAP12,BAX,CCNB1,CRIP2,ENO3,EZH2,MCM2,MGLL,NDUFV3,PCBD2,PSMA2,SOD2,TP53I3
COL18A1		other		-0.277	bias	2.10E-03	ANTXR1,FN1,ITGAV,RELA,STAT1	91 (13)
dextran sulfate		chemical drug				2.13E-03	ADA,ANLN,CCNB1,GADD45GIP1,HMOX1,KNTC1,PHGDH,RACGAP1,RELA,STMN1	76 (6)
BAX	0.456	transporter				2.16E-03	BAX,CCNB1,CDK2,JAK1
EIF2AK4		kinase		1.067		2.16E-03	HMOX1,PHGDH,PSPH,SOD2
ATF6		transcription regulator		-0.692	bias	2.21E-03	BAX,CPT1A,CRELD2,DNAJB11,WFS1
ZNF768		other				2.23E-03	AURKB,CCNB1,EZH2
alpha-tocopherol		chemical drug				2.23E-03	BAX,HMOX1,SQSTM1	118 (21)
iron		chemical - endogenous mammalian		-0.958		2.31E-03	CCNB1,HMOX1,NDRG1,SOD2	103 (19)
SREBF1		transcription regulator		-0.956	bias	2.34E-03	BAX,CYB5A,FN1,HMGCS1,HMOX1,LGALS3,LSS,RDH11,SEZ6L2	91 (14)
KDM5A		transcription regulator		0.000	bias	2.36E-03	GADD45GIP1,HMOX1,MCM2,MRPL53,SOD2,TOMM22
lithium chloride		chemical drug	Inhibited	-2.393		2.45E-03	ACAT2,BAX,EZH2,HMGCS1,HMOX1,LSS	102 (15)
SIRT1		transcription regulator		-0.941		2.46E-03	ACTB,ANXA4,AURKB,BAX,CPT1A,FN1,HMOX1,LGALS3,NEDD4L,RELA,SOD2,STAT1	112 (18)
BIRC5		other				2.47E-03	AURKB,BAX,CHUK,FN1	102 (18)
CBL		transcription regulator		1.067	bias	2.47E-03	FN1,HMOX1,SQSTM1,STAT1	105 (17)
D-galactosamine		chemical - endogenous mammalian				2.47E-03	BAX,HMOX1,RELA,SOD2	102 (16)
XIAP		enzyme				2.49E-03	RELA,SOD2,SQSTM1	95 (13)
nilvadipine		chemical drug				2.49E-03	ADA,CD38,RAB18
ellagic acid		chemical - endogenous non-mammalian				2.49E-03	BAX,CDK2,HMOX1	104 (16)
kaempferol		chemical toxicant				2.49E-03	ABCG2,HMOX1,MUC5AC	90 (11)
chrysin		chemical - endogenous non-mammalian				2.49E-03	HMOX1,JAK1,MUC5AC
trans-hydroxytamoxifen		chemical drug		-1.287		2.51E-03	CCNB1,FN1,LMNA,MYO1B,NDRG1,RAP1GAP,STAT1
PPARGC1A		transcription regulator		0.595		2.51E-03	BAX,CPT1A,CTSC,DOCK1,HMOX1,PNPLA2,RBP4,RELA,SOD2,STAT1,STAT5B,UQCRH	108 (15)
GCN2iB		chemical drug		-0.555		2.55E-03	ACTB,CPT1A,ENO3,HMOX1,NDUFV3
Insulin		group		-1.012		2.57E-03	ACTB,CCT5,CCT7,CDK2,CYB5A,FN1,HMGCS1,HMOX1,MELTF,NDUFV3,OGT,PNPLA2,RBP4,SOD2,STAT1,STX4	112 (15)
tetrachlorodibenzodioxin		chemical toxicant		1.177		2.58E-03	ABCG2,ACTN1,ALDH3A1,BAX,CCT5,CDK2,GLRX,HMOX1,MUC5AC,RELA,SLC7A5,SOD2,STMN1	129 (19)
obeticholic acid		chemical drug		-1.000		2.64E-03	CPT1A,FN1,RELA,SMAD4	67 (7)
PRKAA		group		-0.132		2.64E-03	BAX,CPT1A,RELA,STAT1	123 (18)
ITGAV	-0.458	transmembrane receptor		-1.982	bias	2.64E-03	BAX,FN1,ITGAV,RTN4RL2	97 (16)
PSEN1		peptidase				2.64E-03	ABCG2,ACTB,ATP5F1C,BAX,CLTA,CPLX2,CTSC,CTSZ,SQSTM1,STMN1,TUBA1C	93 (12)
diclofenac		chemical drug		1.406		2.67E-03	HPGD,LGALS3,PSPH,SOD2,SQSTM1	97 (9)
SLC25A4		transporter				2.73E-03	DCTN6,SOD2
chlorpyrifos		chemical toxicant				2.73E-03	ABCG2,HMOX1
protocatechuic acid		chemical - endogenous non-mammalian				2.73E-03	HMOX1,SOD2	81 (10)
Collagen type VI		complex				2.73E-03	BAX,CCNB1
CASR		G-protein coupled receptor		0.728		2.74E-03	AGR2,ANLN,BAX,CCNB1,EZH2,RELA	69 (8)
E. coli serotype 0127B8 lipopolysaccharide		chemical - endogenous non-mammalian		1.134		2.75E-03	GNL1,HMOX1,LGALS3,SLC7A5,SMAD4,SOD2,STAT1	101 (16)
sodium selenite		chemical drug				2.77E-03	BAX,CHUK,HPGD	67 (7)
SLC39A8		transporter				2.77E-03	ABCG2,CRIP2,NT5C3B
PLA2R1		transmembrane receptor				2.77E-03	ALDH2,CYB5R3,SOD2
ZNF507		transcription regulator				2.77E-03	BAX,CCNB1,CDK2
CLUH		translation regulator		0.762		2.81E-03	ALDH2,FDXR,MRPL1,STAT1
CAT		enzyme		0.218		2.81E-03	BAX,FN1,HMOX1,MUC5AC	98 (17)
docetaxel		chemical drug		1.759		2.84E-03	BAX,CCNB1,CDK2,CTNND1,ITGAV,PFKP	94 (10)
L-glutamic acid		chemical - endogenous mammalian		0.241		2.94E-03	ABCG2,ACTB,BAX,HMGCS1,MGLL,RELA	109 (15)
CEBPA		transcription regulator		0.165		2.99E-03	AKAP12,BIN1,CPS1,CPT1A,EPHX1,FTO,GLRX,H1-10,HMOX1,HPGD,SERPINB1,SOD2	115 (13)
molybdenum disulfide		chemical reagent		0.816		3.05E-03	CTPS1,CTSC,DCBLD2,FN1,HMOX1,ITPR3
mibolerone		chemical drug		-0.816		3.05E-03	ALDH3A1,CLTA,DNAJB11,HMGCS1,LSS,STMN1
PG3-Oc		chemical reagent				3.06E-03	DDB2,LMNA,NDRG1
ACTL6A		other				3.06E-03	CCNB1,CDK2,HMOX1	81 (7)
mir-26		microRNA				3.06E-03	EZH2,HPGD,SMAD4	67 (7)
CDKN2B		transcription regulator				3.06E-03	GLS,PHGDH,PSPH
PELP1		other				3.15E-03	ADA,BAX,CDK2,CPNE1,NDRG1,TP53I3	89 (6)
TO-901317		chemical reagent		1.387		3.17E-03	ALDH2,CCNB1,CDK2,CPT1A,EPHX1,LGALS3,MGLL,PFKP	111 (17)
actinomycin D		biologic drug		0.871		3.17E-03	ACTB,BAX,CD38,FN1,HMOX1,ITPR3,RELA,TP53I3	106 (16)
nickel chloride		chemical toxicant		0.305		3.18E-03	GLRX,HMOX1,NDRG1,SQSTM1
maslinic acid		chemical - endogenous non-mammalian				3.20E-03	ACTN1,BAX,DOCK1,JAK1,PNPLA2
mir-210		microRNA		-0.447	bias	3.20E-03	HECTD1,NDRG1,PSAP,SH3BGRL,STMN1
15-deoxy-delta-12,14 -PGJ 2		chemical - endogenous mammalian		0.250		3.33E-03	BAX,CCNB1,CDK2,FN1,GSN,HMOX1,PTGES2,STAT1	111 (18)
clofibrate		chemical drug		-1.467		3.34E-03	ABCG2,BAX,CCNB1,CPT1A,HMOX1	118 (19)
LLGL2		other				3.38E-03	GLS,NDRG1,STMN1
FAM117B		other				3.38E-03	ALDH3A1,HMOX1,SOD2	20 (2)
torin1		chemical reagent				3.47E-03	ATP6AP1,PFKP,RPL14,RPL15,RPL24,RPS15A,UQCRH
cephaloridine		chemical drug		-1.342		3.49E-03	CCNB1,HMOX1,KNTC1,NUP93,POLA2
bendamustine		chemical drug				3.49E-03	BAX,CCNB1
AAMDC		other				3.49E-03	PHGDH,PSPH
miR-142-5p (and other miRNAs w/seed AUAAAGU)		mature microRNA				3.49E-03	CCNB1,PAICS
genipin		chemical - endogenous non-mammalian				3.49E-03	CDK2,HMOX1
di-spiropyrrolizidino oxindole andrographolide derivative CY2		chemical reagent				3.49E-03	BAX,RELA
racemic flurbiprofen		chemical drug				3.49E-03	CCNB1,HPGD
tangeretin		chemical - endogenous non-mammalian				3.49E-03	BAX,RELA	67 (7)
trigonelline		chemical - endogenous mammalian				3.49E-03	ACE2,HMOX1	20 (2)
D-alpha-hydroxyglutarate		chemical - endogenous mammalian				3.49E-03	FTO,PFKP
STAT6		transcription regulator		0.437		3.54E-03	ACTB,ALDH2,BAX,CD38,CDK2,CPT1A,EPHX1,FN1,MUC5AC,PNPLA2,SQSTM1,STAT5B	122 (18)
CD44		other		0.393	bias	3.59E-03	ABCG2,ACTB,FN1,ITGAV,LGALS3,MYO1B,PFKP,RELA	128 (19)
3,5-dihydroxyphenylglycine		chemical reagent		-1.633		3.62E-03	RPL14,RPL15,RPL24,RPS15A,WFS1,ZCRB1
butyric acid		chemical - endogenous mammalian		0.292		3.66E-03	BAX,CCNB1,CDK2,GAA,GSN,HSPG2,ITPR3,NAMPT,PSAP,RELA,STAT5B,TP53I3	126 (19)
MDM4		transcription regulator				3.71E-03	BAX,LGALS3,SOD2	81 (7)
dithiothreitol		chemical reagent				3.71E-03	HMOX1,PTGES2,TOR1A
epigallocatechin-gallate		chemical drug		-0.212		3.77E-03	BAX,FN1,HMOX1,ITGAV,RBP4,RELA,SMAD4,STAT1	120 (18)
cholesterol		chemical - endogenous mammalian		1.741		3.77E-03	CPT1A,EPHX1,FN1,HMGCS1,JAK1,LGALS3,RDH11,SLC7A5	102 (13)
EIF2AK2		kinase		0.314	bias	3.80E-03	AKT2,BAX,NNMT,SOD2,STAT1	89 (7)
N-nitro-L-arginine methyl ester		chemical drug		0.936		3.80E-03	BAX,CHUK,FN1,HMOX1,ITGAV	104 (18)
POR		enzyme		1.698		3.89E-03	ACAT2,CPT1A,HMGCS1,HMOX1,LSS,STAT1,SUSD2
PDX1		transcription regulator				3.89E-03	ACE2,ACTB,CRELD2,PAPSS2,PHGDH,PNPO,WFS1
THPO		cytokine		-0.246		3.96E-03	AURKB,BAX,CCNB1,SOD2,STAT1	111 (16)
SHH		peptidase		-1.067		4.00E-03	ABCG2,BAX,BCAR1,CCNB1,CTPS1,FN1,MCM2	70 (10)
SEMA7A		transmembrane receptor				4.07E-03	BAX,FN1,RELA	67 (7)
mir-31		microRNA				4.07E-03	EZH2,RELA,STMN1
ACVR1C		kinase				4.07E-03	CDK2,FN1,HMOX1	104 (16)
letrozole		chemical drug				4.07E-03	AGR2,BAX,CDK2
valproic acid		chemical drug		-0.287		4.10E-03	ADRM1,CPT1A,CTPS1,DNAJB11,HMGCS1,HMOX1,LAGE3,MECP2,PNPLA2,PSMA2,PSMC3,SQSTM1	109 (7)
gefitinib		chemical drug				4.11E-03	AURKB,CCNB1,CDK2,EZH2,HMOX1,KIF23,STAT1	106 (16)
mir-34		microRNA		1.000	bias	4.13E-03	BAX,CPLX2,FN1,MARCKS,PFKP	15 (3)
TSC1		other		0.152		4.13E-03	BAX,GLRX,HMOX1,PSAP,STAT1	94 (13)
methotrexate		chemical drug		-1.342		4.15E-03	ACTB,ANXA4,CPT1A,ENO3,GSN,HMGCS1,HMOX1,STAT5B	80 (7)
FOXO3		transcription regulator		0.806		4.18E-03	ALDH3A1,CCNB1,JAK1,MCM2,NAMPT,NDRG1,RELA,SERPINB1,SMAD4,SOD2	102 (15)
RORC		ligand-dependent nuclear receptor				4.23E-03	ALDH2,CCNB1,GLS,HPGD,NNMT,PROCR,SLC7A5
SOD2	0.555	enzyme				4.30E-03	CCNB1,GSN,HMOX1,RELA,SOD2	103 (20)
GW9662		chemical reagent		0.246		4.30E-03	AGR2,BAX,CEACAM6,FN1,RELA	98 (15)
BML-111		chemical reagent				4.33E-03	HMOX1,LGALS3
WDR4		enzyme				4.33E-03	CCNB1,FN1
alpha-santalol		chemical reagent				4.33E-03	CCNB1,CDK2
2-hydroxy-1-naphthylaldehyde isonicotinoyl hydrazone		chemical reagent				4.33E-03	CCNB1,CDK2
perilla alcohol		chemical drug				4.33E-03	CCNB1,CDK2
AI-1		chemical reagent				4.33E-03	GLS,HMOX1
NCF1		enzyme				4.44E-03	FN1,HMOX1,STAT1	109 (19)
mir-124		microRNA				4.44E-03	BAX,RELA,SQSTM1	87 (7)
miR-199a-3p (and other miRNAs w/seed CAGUAGU)		mature microRNA				4.44E-03	FN1,RELA,SMAD4
DHX9		enzyme				4.44E-03	AGR2,FN1,NDRG1	68 (7)
ST6GAL1		enzyme				4.44E-03	FN1,PROCR,RELA	81 (10)
vitamin K3		chemical drug				4.44E-03	BAX,HMOX1,NAMPT	115 (18)
sodium tungstate		chemical drug				4.44E-03	ACTB,ENO3,SOD2
TERT		enzyme				4.46E-03	BAX,CTSC,GSN,IQGAP2,ITGAV,MFGE8,SOD2
26s Proteasome		complex		-0.569		4.56E-03	ADRM1,BAX,KIF23,PSAP,SQSTM1,STAT1	111 (15)
PIK3CA		kinase				4.58E-03	CCNB1,CSE1L,EZH2,HMOX1,LGALS3,PCNP,PROCR	85 (11)
bucladesine		chemical toxicant		-0.104		4.68E-03	ALDH3A1,CD38,CPT1A,EZH2,FN1,HMOX1,MACROD1,RELA,SLC9A3R2,SOD2	109 (20)
MLXIPL		transcription regulator	Inhibited	-2.236	bias	4.70E-03	CPT1A,PNPLA2,RPL14,RPL15,RPL24,RPS15A
deoxycholate		chemical - endogenous mammalian				4.73E-03	BAX,GLS,HPGD,RELA	85 (12)
progesterone		chemical - endogenous mammalian		1.448		4.82E-03	ABCG2,ACTB,BAX,CCNB1,CDK2,FN1,LGALS3,MCM2,NDRG1,PGRMC1,RBP4,SOD2,STAT1,STAT5B,TJP2	117 (17)
miR-24-3p (and other miRNAs w/seed GGCUCAG)		mature microRNA				4.84E-03	AURKB,BAX,SMAD4
asciminib		chemical drug				4.84E-03	MCM2,SLC7A5,SQSTM1
4-(2-aminoethyl)benzenesulfonylfluoride		chemical - protease inhibitor				4.84E-03	FN1,HMOX1,SOD2	103 (14)
bardoxolone		chemical drug				4.84E-03	EPHX1,HMOX1,SQSTM1	43 (5)
CXCL8		cytokine		-0.832		4.84E-03	ABCG2,BAX,HSPG2,LGALS3,TJP2	98 (12)
DNMT1		enzyme				4.84E-03	ACTB,CCNB1,EZH2,FN1,NDRG1	93 (15)
1-methyl-4-phenyl-1,2,3,6-tetrahydropyridine		chemical toxicant		0.846		4.84E-03	ANLN,BAX,HMOX1,SOD2,SQSTM1	114 (19)
MMP12		peptidase				4.99E-03	ACTN1,CCT5,PSAP,PSMC3
Mapk		group				5.04E-03	ADA,HMOX1,HPGD,RELA,STAT1	117 (16)
uranyl nitrate		chemical toxicant		-0.277		5.04E-03	ATP5IF1,LGALS3,NDRG1,SQSTM1,TUBA1C
L-triiodothyronine		chemical - endogenous mammalian	Inhibited	-2.263		5.08E-03	ACAT2,ACTB,AKT2,BAX,CDK2,CPT1A,HMGCS1,ITGAV,LGALS3,LMNA,LSS,MUC5AC,RAB34	106 (14)
puromycin aminonucleoside		chemical reagent		1.000		5.23E-03	ACTB,BAX,BCAR1,LGALS3,SOD2
PAK1		kinase				5.25E-03	CCNB1,CTNND1,FN1	45 (7)
green tea polyphenol		chemical drug				5.25E-03	BAX,CHUK,HMOX1	100 (17)
ursodeoxycholic acid		chemical - endogenous mammalian		0.147		5.26E-03	ABCG2,BAX,CDK2,LGALS3	89 (10)
L-serine		chemical - endogenous mammalian				5.26E-03	PHGDH,PSPH
CYP46A1		enzyme				5.26E-03	HMGCS1,LSS
CD53		other				5.26E-03	BAX,GLS
mir-874		microRNA				5.26E-03	BAX,FDXR
salinomycin		chemical - endogenous non-mammalian				5.26E-03	FN1,SQSTM1	84 (7)
WNT5B		other				5.26E-03	FN1,SLC7A5
UBE2E2		enzyme				5.26E-03	HMOX1,SQSTM1	20 (2)
USP11		peptidase				5.26E-03	BAX,CHUK
TP53BP2		other				5.26E-03	BAX,TP53I3
LRPPRC		other				5.26E-03	ATP5IF1,SQSTM1
CHRNA3		transmembrane receptor				5.26E-03	JAK1,STAT1
CYBA		enzyme				5.26E-03	FN1,SOD2
manumycin A		chemical reagent				5.26E-03	FN1,MUC5AC	91 (13)
tyrphostin AG 1296		chemical drug				5.26E-03	CD38,CEACAM6
arachidonyltrifluoromethane		chemical reagent				5.26E-03	ABCG2,SOD2
nandrolone		chemical drug				5.26E-03	HMOX1,SOD2
NR3C1		ligand-dependent nuclear receptor		-0.647		5.30E-03	ACTB,ACTN1,AKT2,ATP6AP1,BABAM2,BAX,BIN1,CD38,CPS1,CPT1A,FN1,ITGAV,NAMPT,PNPLA2,RELA,TP53I3	120 (17)
tretinoin		chemical drug		-1.374		5.42E-03	ADA,AKAP12,ALDH3A1,CCNB1,CCT5,CD38,CDK2,CEACAM6,CPT1A,CSE1L,CTNND1,CTSC,CYP4F11,DDB2,DPYSL3,EPHX1,FN1,HMOX1,HSPBP1,JAK1,KIF23,MUC5AC,MYO1C,NDRG1,NME3,PEG10,RBP4,RELA,SMAD4,STAT1	132 (20)
FAS		transmembrane receptor				5.42E-03	AKT2,BAX,CTNND1,IQGAP2,ITGAV,LGALS3,MARK2,PLEC,RELA,SOD2	102 (12)
RBM20		other				5.44E-03	BICC1,DPYSL3,KPNA1,NUFIP2,OTUD4
CpG ODN 2216		chemical reagent				5.69E-03	CD38,RELA,STAT1	95 (10)
mir-214		microRNA				5.69E-03	CELF1,EZH2,RELA
PARK7		enzyme				5.69E-03	BAX,FN1,SOD2	112 (18)
andrographolide		chemical drug				5.69E-03	BAX,FN1,HMOX1	100 (16)
bortezomib		chemical drug		-0.617		5.72E-03	AGR2,BAX,CCNB1,CDK2,HTRA2,NECTIN2,PSMA2,SQSTM1	89 (9)
ELOVL3		enzyme		1.982		5.82E-03	ACAT2,IQGAP2,LSS,TECR
IKZF3		transcription regulator	Inhibited	-2.000		5.82E-03	ANTXR1,CD38,FN1,MGLL
glutathione		chemical - endogenous mammalian		1.000		5.82E-03	BAX,HMOX1,NDRG1,SOD2	114 (15)
NGF		growth factor		-1.676		5.84E-03	BAX,CDK2,HMOX1,MACROD1,PPP2R5E,RELA,SHTN1,SQSTM1	123 (17)
diethylnitrosamine		chemical toxicant				6.01E-03	ALDH3A1,AURKB,CELF1,HMOX1,RELA,SMAD4	114 (15)
CD40		transmembrane receptor		0.164	bias	6.03E-03	BAX,CD38,GLS,LGALS3,MRTO4,PES1,RELA,RRP9,TBRG4	100 (11)
P38 MAPK		group		0.818	bias	6.03E-03	BAX,DDB2,FDXR,FN1,HMOX1,ITGAV,MUC5AC,STAT1,TJP2,TP53I3	132 (21)
sulforafan		chemical drug		-0.804		6.10E-03	ABCG2,BAX,CCNB1,EPHX1,HMOX1,PGRMC1,RELA,SQSTM1	105 (15)
L-arginine		chemical - endogenous mammalian				6.14E-03	FN1,NAMPT,RELA	67 (7)
PRKCZ		kinase				6.14E-03	BAX,HMOX1,PHGDH	108 (19)
amiodarone		chemical drug				6.14E-03	HMOX1,LSS,SOD2	18 (3)
ST1926		chemical drug		1.633	bias	6.19E-03	ACTB,RPL24,SRP72,TRIR,UBE2M,UQCRH
embelin		chemical - endogenous non-mammalian				6.27E-03	BAX,CDK2
OICR-9429		chemical reagent				6.27E-03	CCNB1,MCM2
naringin		chemical - endogenous non-mammalian				6.27E-03	BAX,HMOX1	97 (13)
liquiritigenin		chemical - endogenous non-mammalian				6.27E-03	EPHX1,HMOX1
DDB2	0.556	transcription regulator				6.27E-03	BAX,SOD2	101 (10)
FOXD3		transcription regulator				6.27E-03	AKT2,EZH2
AJUBA		transcription regulator				6.27E-03	BCAR1,DOCK1
MAP1LC3B		other				6.27E-03	RELA,SQSTM1
CXCL16		cytokine				6.27E-03	CD38,FN1
roflumilast N-oxide		chemical - endogenous mammalian				6.27E-03	HMOX1,MUC5AC
trientine		chemical drug				6.27E-03	FN1,SMAD4
dehydrocostus lactone		chemical - endogenous non-mammalian				6.27E-03	CCNB1,CDK2
zinostatin		biologic drug				6.27E-03	BAX,CROCC
androstenediol		chemical - endogenous mammalian				6.27E-03	BAX,RELA	92 (7)
miR-16-5p (and other miRNAs w/seed AGCAGCA)		mature microRNA		1.890	bias	6.40E-03	ADSS2,ANLN,GNL3L,HMOX1,KIF23,OGT,SQSTM1
curcumin		chemical drug		0.120		6.58E-03	BAX,CCNB1,CDK2,EZH2,HMOX1,MGLL,NAMPT,PNPLA2,RELA,SERPINB1	113 (18)
UBE2I		enzyme				6.62E-03	CPT1A,SMAD4,STAT1	83 (7)
HIF1A		transcription regulator		-1.112		6.74E-03	AKAP12,BAX,CTPS1,CYB5A,ENO3,FN1,HMOX1,ITGAV,NDRG1,PFKP,RELA,SOD2,STAT1	126 (19)
plicamycin		chemical drug		0.218		6.77E-03	ABCG2,AKT2,HMOX1,MUC5AC,SQSTM1
NUPR1		transcription regulator		1.732		6.82E-03	AKAP12,CDK2,CHUK,CYSTM1,H1-5,ITPR3,KIF23,LMAN2L,MGLL,NDRG1,POLA2,ZPR1
cyclic AMP		chemical - endogenous mammalian		1.390		6.94E-03	ANTXR1,CPS1,FN1,ITPR3,KIF23,RBP4,SOD2,STAT1	127 (23)
ETV5		transcription regulator		1.119		7.01E-03	BAX,FN1,LGALS3,MUC5AC,TJP2
SIRT3		enzyme				7.05E-03	BAX,CPT1A,SOD2,SQSTM1	67 (7)
IFT88		other				7.12E-03	ACAT2,HMGCS1,LSS
discodermolide		chemical drug				7.12E-03	CCNB1,CDK2,KIF23
IKZF1		transcription regulator		-1.021		7.24E-03	ANTXR1,CD38,CTNND1,DOCK1,FN1,KIF23,MGLL,MYO1B	8 (2)
SAR1A		enzyme				7.37E-03	CPT1A,RELA
NACC1		transcription regulator				7.37E-03	BAX,GADD45GIP1
CH25H		enzyme				7.37E-03	HMGCS1,LSS
APOC3		transporter				7.37E-03	HTRA2,SOD2
meloxicam		chemical drug				7.37E-03	HPGD,RELA
N,N-dimethylsphingosine		chemical reagent				7.37E-03	FN1,MUC5AC	71 (10)
MEF2D		transcription regulator		1.119		7.39E-03	CDK2,FN1,HMOX1,SOD2	67 (7)
ERG		transcription regulator				7.39E-03	ACTN1,AGR2,DOCK1,EZH2,HPGD,NDRG1,PCNP,SMARCC1	71 (7)
MYCN		transcription regulator		-0.870		7.43E-03	ABCG2,ACTB,BAX,DPYSL3,EZH2,FN1,NDRG1,PHGDH,RPL24	103 (15)
1,4-bis[2-(3,5-dichloropyridyloxy)]benzene		chemical toxicant		0.418		7.52E-03	CCNB1,CDK2,CPT1A,PAPSS2,PNPLA2
paclitaxel		chemical drug		1.934		7.56E-03	ABCG2,ACE2,BAX,CDK2,CHUK,LGALS3,PHGDH,SOD2,STMN1	121 (19)
ITCH		enzyme				7.64E-03	CSE1L,PHGDH,SLC7A5
DDX3X		enzyme				7.64E-03	EZH2,RPL15,STAT1
pimagedine		chemical drug				7.64E-03	BAX,HMOX1,RELA	80 (10)
F2		peptidase		0.726	bias	7.70E-03	BAX,CTPS1,FN1,HMOX1,MGLL,PROCR,RELA,SOD2	103 (16)
MAP2K6		kinase		0.762		7.73E-03	BAX,MUC5AC,RELA,STAT1	115 (21)
SP3		transcription regulator				7.75E-03	AKAP12,MUC5AC,PROCR,RELA,SMARCC1,SOD2,STAT1
AMPK		complex		0.648		7.78E-03	BAX,CCNB1,GSTK1,HMOX1,STAT1	107 (19)
testosterone		chemical - endogenous mammalian		0.031		7.93E-03	BAX,CDK2,CYB5A,FN1,NDRG1,PSMA2,PSMC3,RELA,SMARCC1,SOD2	120 (18)
mifepristone		chemical drug		-1.195		7.99E-03	AGR2,BAX,CTNND1,FN1,HPGD,NDRG1,RAP1GAP,RELA,SQSTM1	114 (16)
AZ-1		chemical - protease inhibitor		1.000		8.09E-03	ADSS2,FN1,PEG10,SMARCC1
ursolic acid		chemical drug				8.09E-03	BAX,MUC5AC,RELA,SOD2	114 (18)
OSM		cytokine		1.161		8.14E-03	DDX27,FN1,HMOX1,MARCKS,MGLL,MPDU1,NAMPT,NEDD4L,RELA,SERPINB1,SMAD4,STAT1,TECR	53 (9)
H-7		chemical - kinase inhibitor				8.18E-03	ALDH3A1,FN1,SOD2	93 (12)
SN-38		biologic drug				8.18E-03	BAX,CCNB1,NAMPT	94 (10)
CD40LG		cytokine		0.099	bias	8.20E-03	BAX,CD38,CTSC,LAS1L,MARCKS,NAMPT,PSMA2,RELA,SOD2,STAT1	115 (17)
AHR		ligand-dependent nuclear receptor		-0.418		8.22E-03	ABCG2,ACTN1,ALDH2,ALDH3A1,BAX,CCNB1,CD38,CDK2,FN1,MUC5AC,NNMT,SOD2	124 (19)
cigarette smoke		chemical toxicant		0.696		8.31E-03	ALDH3A1,FN1,HMOX1,MUC5AC,RELA,SOD2,SQSTM1	113 (18)
benzo(a)pyrene		chemical toxicant		1.387		8.31E-03	ALDH3A1,BAX,CYB5A,EPHX1,HMOX1,RAP1GAP,SQSTM1	101 (11)
fluticasone propionate		chemical drug		1.633		8.43E-03	HPGD,MFGE8,MUC5AC,NAMPT,PAPSS2,STAT1
FGF21		growth factor		-0.371		8.45E-03	CPT1A,PHGDH,RELA,SOD2	67 (7)
folic acid		chemical - endogenous mammalian				8.45E-03	ABCG2,FN1,LGALS3,RELA	75 (7)
SOD1		enzyme				8.52E-03	ACTB,BAX,DPYSL3,HMOX1,NDUFV3,SOD2,SQSTM1,STMN1	111 (16)
UCA1		other				8.54E-03	EZH2,SLC7A5	67 (7)
allyl isothiocyanate		chemical toxicant				8.54E-03	BAX,HMOX1
trans-stilbene oxide		chemical reagent				8.54E-03	EPHX1,HMOX1
delta-aminolevulinic acid		chemical - endogenous mammalian				8.54E-03	HMOX1,JAK1
polycyclic aromatic hydrocarbons		chemical toxicant				8.54E-03	ALDH3A1,BAX	50 (6)
pyrimidin-2-one beta-ribofuranoside		chemical reagent				8.54E-03	CDK2,SQSTM1
ML385		chemical reagent				8.54E-03	HMOX1,SQSTM1
SALL4		transcription regulator		-0.816		8.66E-03	ACTB,AKAP12,CDK2,FN1,ITGAV,RAP1GAP	80 (7)
isoproterenol		chemical drug		-0.275		8.66E-03	HMOX1,LGALS3,NAMPT,PNPLA2,RAB18,SOD2	118 (19)
carbamylcholine		chemical drug				8.74E-03	ABCG2,CHUK,ITPR3
propofol		chemical drug				8.74E-03	BAX,HMOX1,SOD2	109 (19)
oxaliplatin		chemical drug				8.83E-03	BAX,KIF23,SQSTM1,STAT1	90 (11)
fulvestrant		chemical drug		1.463		8.87E-03	BAX,CCNB1,MCM2,MYO1B,POLA2,SLC7A5,SQSTM1,STMN1	98 (16)
IL3		cytokine				8.90E-03	ADA,ALDH2,CCT5,CPT1A,ITGAV,MYO1C,PHGDH,SLC7A5,SMAD4	81 (7)
BRD4		kinase		-0.659	bias	9.13E-03	AURKB,FN1,HMOX1,KIF23,SUSD2,TP53I3	84 (10)
uric acid		chemical - endogenous mammalian		-0.277		9.18E-03	CDK2,DDB2,HMOX1,ITGAV,SQSTM1	96 (13)
celecoxib		chemical drug		-1.199		9.18E-03	ABCG2,BAX,HMOX1,MUC5AC,RELA	125 (18)
rottlerin		chemical drug		-1.869	bias	9.21E-03	BAX,HMOX1,MUC5AC,TJP2	103 (13)
pituitary adenylate cyclase-activating polypeptide		biologic drug				9.33E-03	DPYSL3,MACROD1,MECP2
FOXA1		transcription regulator		-1.960		9.37E-03	AGR2,CPS1,EPHX1,GLS,MUC5AC,NDUFV3	14 (2)
fatty acid		chemical - endogenous mammalian		0.152		9.48E-03	ATP5F1C,BAX,HMOX1,RBP4,SQSTM1	79 (16)
IL13		cytokine		0.367		9.58E-03	ACE2,ADA,BAX,CTSC,FN1,GSN,HMOX1,JAK1,MUC5AC,PFKP,TJP2	109 (19)
IL5		cytokine		-0.707	bias	9.60E-03	CRELD2,CTSC,ITGAV,NDRG1,NDUFV3,PFKP,RAP1GAP,SLC7A5
particulate matter		chemical reagent				9.78E-03	ACE2,MUC5AC
mir-373		microRNA				9.78E-03	CDK2,RELA
GLUL		enzyme				9.78E-03	GLS,SLC7A5
CAPN3		peptidase				9.78E-03	HMOX1,SOD2
SDHB		enzyme				9.78E-03	FN1,SOD2
POLDIP2		other				9.78E-03	LGALS3,OGT
ginkgolide B		chemical drug				9.78E-03	BAX,HTRA2
ethylene dimethanesulfonate		chemical reagent				9.78E-03	ACE2,BAX
zeranol		chemical - endogenous mammalian				9.78E-03	BAX,HMOX1
zinc protoporphyrin IX		chemical - endogenous mammalian				9.78E-03	HMOX1,SOD2	101 (13)
(-)-norephedrine		chemical drug				9.78E-03	HMGCS1,LSS
N-carbobenzyloxy-leucine-leucine-norvalinal		chemical - protease inhibitor				9.78E-03	BAX,BCAR1
asiatic acid		chemical reagent				9.78E-03	BAX,CCNB1	81 (7)
IRAK1		kinase				9.94E-03	MUC5AC,RELA,STAT1	104 (16)
FUS-DDIT3		fusion gene/product				9.94E-03	FN1,NAMPT,PLEC
lysophosphatidylcholine		chemical - other	Inhibited	-2.000	bias	1.01E-02	CPT1A,HMGCS1,LSS,PTGES2,RDH11
trilinolein		chemical - endogenous mammalian				1.01E-02	BAX
12(R)-hydroxyeicosatetraenoic acid		chemical - endogenous mammalian				1.01E-02	MUC5AC
aucubin		chemical - endogenous non-mammalian				1.01E-02	BAX
SMAD decoy ODN		chemical reagent				1.01E-02	SMAD4
APIO-EE-07		chemical drug				1.01E-02	BAX
cortodoxone		chemical - endogenous mammalian				1.01E-02	FN1
beta,beta-dimethylacrylalkannin		chemical - endogenous non-mammalian				1.01E-02	NEDD4L
lactotrehalose		chemical reagent				1.01E-02	NAMPT
ND-13		chemical reagent				1.01E-02	FN1
eicosa-11Z, 14Z-dienoic acid		chemical - endogenous mammalian				1.01E-02	PNPLA2
ZYG11B		other				1.01E-02	CCNB1
dendrobium officinale polysaccharide		chemical - endogenous mammalian				1.01E-02	HMOX1
Ggt		group				1.01E-02	SLC7A5
thymidine phosphorylase		group				1.01E-02	MARCKS
ASC-JM17		chemical reagent				1.01E-02	SOD2
Aspp		group				1.01E-02	BAX
SERPINE3		other				1.01E-02	MUC5AC
phosphorodiamidate morpholino oligomers		chemical - other				1.01E-02	LMNA
3-tert-butyl-4-hydroxyanisole		chemical reagent				1.01E-02	EPHX1
AEOL 10113		chemical drug				1.01E-02	BAX
HSD17B11		enzyme				1.01E-02	PNPLA2
FBXL17		other				1.01E-02	HMOX1
BRIP1		enzyme				1.01E-02	HMOX1
MACC1		transcription regulator				1.01E-02	FN1
Lamin b		group				1.01E-02	LMNA
ELSPBP1		other				1.01E-02	ADSS2
ZNF667		transcription regulator				1.01E-02	BAX
LRRC4		other				1.01E-02	STMN1
ZYG11A		other				1.01E-02	CCNB1
cis-vaccenic acid		chemical - endogenous mammalian				1.01E-02	PNPLA2
PTPRM		phosphatase				1.01E-02	CTNND1
1-deoxysphinganine		chemical - endogenous non-mammalian				1.01E-02	PHGDH
RGS5		enzyme				1.01E-02	BAX
miR-3180-5p (miRNAs w/seed UUCCAGA)		mature microRNA				1.01E-02	BAX
mir-3180		microRNA				1.01E-02	BAX
miR-638 (miRNAs w/seed GGGAUCG)		mature microRNA				1.01E-02	CDK2
mir-638		microRNA				1.01E-02	CDK2
PPP2R5E	-1.481	phosphatase				1.01E-02	FN1
EIF2B2		translation regulator				1.01E-02	ACTB
AMPH		other				1.01E-02	BIN1
NUAK2		kinase				1.01E-02	CDK2
PSMD1		other				1.01E-02	RELA
CYB5A	0.607	enzyme				1.01E-02	JAK1
KRT19P3		other				1.01E-02	COPS7A
HGSNAT		enzyme				1.01E-02	ATP5F1C
TUB		transcription regulator				1.01E-02	NAMPT
MPT0B214		chemical reagent				1.01E-02	CCNB1
PSMD3		other				1.01E-02	RELA
LINC01564		other				1.01E-02	PHGDH
dulanermin		biologic drug				1.01E-02	BAX
HMGN5		transcription regulator				1.01E-02	CCNB1
GMEB2		transcription regulator				1.01E-02	ADRM1
ASP5878		chemical drug				1.01E-02	CPT1A
RO0281675		chemical reagent				1.01E-02	BAX
pantoprazole		chemical drug				1.01E-02	HMOX1
benzo(a)pyrene-3,6-quinone		chemical toxicant				1.01E-02	HMOX1
HA-1004		chemical drug				1.01E-02	ALDH3A1
phorone		chemical reagent				1.01E-02	HMOX1
GNA002		chemical reagent				1.01E-02	EZH2
CA-074		chemical reagent				1.01E-02	CTSZ
ferricyanide		chemical reagent				1.01E-02	HMOX1
E2F3		transcription regulator				1.01E-02	CCNB1,CDK2,CTNND1,EZH2,MCM2,POLA2
SP600125		chemical drug		-0.861		1.02E-02	ACAT2,BAX,CCNB1,FN1,HMOX1,PLEC,RELA,SOD2,SQSTM1
bleomycin		biologic drug		1.269		1.04E-02	ACE2,BAX,CDH17,FN1,JAK1,LGALS3,RELA,SQSTM1
aspirin		chemical drug		-0.456		1.04E-02	AKAP12,CD38,CDK2,CYB5A,HPGD,RELA
DDIT3		transcription regulator		0.000		1.04E-02	BAX,FN1,HMOX1,NDRG1,PLEC
reactive oxygen species		chemical toxicant				1.04E-02	BAX,GLRX,HMOX1,MUC5AC,SOD2
LARP1		translation regulator	Activated	2.000	bias	1.04E-02	RPL14,RPL15,RPL24,RPS15A
ROR1		kinase				1.06E-02	GLS,NDRG1,STMN1
RBM5		other				1.06E-02	CDK2,MYO1B,STAT5B
GPX1		enzyme				1.06E-02	GLRX,RELA,SOD2
cilostazol		chemical drug				1.06E-02	BAX,HMOX1,RELA
baicalein		chemical drug				1.06E-02	BAX,CCNB1,HMOX1
honokiol		chemical - endogenous non-mammalian				1.06E-02	BAX,CDK2,FN1
imiquimod		chemical drug		0.130	bias	1.06E-02	ATP5F1C,DDB2,HMOX1,NNMT,SOD2,STAT1,XAB2
docosahexaenoic acid		chemical drug		0.043		1.07E-02	BAX,CPT1A,HMOX1,HPGD,PNPLA2,RELA
CpG oligonucleotide		chemical drug				1.07E-02	BAX,CSE1L,PHGDH,RELA,SLC7A5,SOD2
misoprostol		chemical drug				1.11E-02	ABCG2,MUC5AC
prostaglandin A2		chemical - endogenous non-mammalian				1.11E-02	HMOX1,PTGES2
(Z,E)-5-(4-ethylbenzylidine)-2-thioxothiazolidin-4-one		chemical reagent				1.11E-02	CCNB1,EZH2
SAR1B		enzyme				1.11E-02	CPT1A,RELA
DPH5		enzyme				1.11E-02	RELA,STAT1
TRIM31		enzyme				1.11E-02	BAX,CPT1A
SLC2A3		transporter				1.11E-02	PFKP,PHGDH
ATG16L1		enzyme				1.11E-02	SOD2,SQSTM1
TGFBR3		kinase				1.11E-02	BAX,FN1
DGAT1		enzyme				1.11E-02	CPT1A,PNPLA2
mir-290		microRNA				1.11E-02	CDK2,RELA
1,1-bis(3'-indolyl)-1-(4-hydroxyphenyl)methane		chemical reagent				1.11E-02	BAX,FN1
di-2-pyridylketone 4-cyclohexyl-4-methyl-3-thiosemicarbazone		chemical drug				1.11E-02	NDRG1,RELA
rhodioloside		chemical - endogenous non-mammalian				1.11E-02	BAX,HMOX1
rebamipide		chemical drug				1.11E-02	MUC5AC,SOD2
sildenafil		chemical drug				1.12E-02	FN1,HMOX1,NAMPT
NR4A1		ligand-dependent nuclear receptor		0.633		1.14E-02	BABAM2,CTNND1,ENO3,FN1,HMOX1,MUC5AC,NDUFV3,RELA
RAC1		enzyme		0.762		1.14E-02	FN1,GSN,HMOX1,SOD2,STAT1
GCG		other	Inhibited	-2.157		1.14E-02	CPT1A,FN1,LMNA,RAP1GAP,TJP2
tanespimycin		chemical drug		1.342		1.14E-02	AKT2,CHUK,HMGCS1,RPL24,SOD2
PNPLA2	1.198	enzyme				1.18E-02	BAX,CPT1A,GSTK1,PNPLA2
MAPK7		kinase		-1.982	bias	1.18E-02	HMGCS1,HMOX1,LSS,RDH11
ATN1		transcription regulator				1.18E-02	CHUK,DPYSL3,GSN,STMN1,STX4
tanshinone II		chemical - endogenous non-mammalian				1.19E-02	BAX,CDK2,HMOX1
AGTR1		G-protein coupled receptor				1.19E-02	ACE2,FN1,HMOX1
XBP1		transcription regulator		-1.133	bias	1.21E-02	DNAJB11,FN1,GOLPH3,HMOX1,RELA,UBA5,WFS1
MYB		transcription regulator		-0.186		1.21E-02	ADA,BAX,CCNB1,CLTA,EZH2,FN1
SLC15A4		transporter		-0.277	bias	1.21E-02	CRELD2,EZH2,HMOX1,LGALS3,SHTN1
NFkB (family)		group		1.000	bias	1.22E-02	FN1,MUC5AC,RELA,SQSTM1
IRF5		transcription regulator		0.882	bias	1.22E-02	BAX,NAMPT,RELA,STAT1
romidepsin		biologic drug				1.22E-02	BAX,EZH2,GSN,ITGAV
PPARD		ligand-dependent nuclear receptor		1.010		1.23E-02	ALDH2,CDK2,CPT1A,FN1,HMGCS1,MFGE8,PNPLA2,STAT1
AKT1		kinase		0.038		1.23E-02	ACAT2,AURKB,BAX,CDK2,FN1,HMGCS1,HMOX1,LSS
IL33		cytokine		0.378		1.23E-02	ACTB,ALDH3A1,BAX,HMOX1,PAPSS2,PRPF4B,RELA,SERPINB1,SOD2,TJP2
(+)-catechin		chemical drug				1.25E-02	BAX,RELA
triclosan		chemical drug				1.25E-02	HMOX1,MECP2
NOP2		other				1.25E-02	BAX,TP53I3
CBLB		enzyme				1.25E-02	HMOX1,SQSTM1
HDAC8		transcription regulator				1.25E-02	BAX,FN1
bosutinib		chemical drug				1.25E-02	CCNB1,EZH2
ethyl pyruvate		chemical drug				1.25E-02	BAX,HMOX1
decursin		chemical - endogenous non-mammalian				1.25E-02	BAX,CDK2
phenyl-N-tert-butylnitrone		chemical reagent				1.25E-02	FN1,HMOX1
allyl sulfide		chemical drug				1.25E-02	EPHX1,HMOX1
DIM-C-pPhOH-3-Cl-5-OCH3		chemical reagent				1.25E-02	BAX,FN1
REL		transcription regulator		0.282	bias	1.26E-02	ANLN,EZH2,FN1,PHGDH,RELA,SOD2,STAT5B
lysophosphatidylinositol		chemical - endogenous mammalian				1.26E-02	CPT1A,GLS,SOD2
MASTL		kinase				1.26E-02	ADSS2,ANLN,RDH11
mir-19		microRNA				1.26E-02	PPP2R5E,PSAP,SMAD4
acetovanillone		chemical drug				1.26E-02	HMOX1,MUC5AC,SOD2
GRN		growth factor				1.27E-02	BAX,BIN1,CTSZ,JAK1,LGALS3,SQSTM1
TFEB		transcription regulator		-0.749	bias	1.29E-02	CCNB1,GAA,KIF23,NUP54,POLA2,PSAP,SQSTM1,WDHD1
NOS2		enzyme		0.085		1.30E-02	ALDH3A1,BAX,CTSC,HMOX1,MUC5AC,RELA
ATG5		other		1.067		1.32E-02	AGR2,CTSC,RELA,SQSTM1
DRD2		G-protein coupled receptor		0.152		1.32E-02	BAX,CHUK,PNPLA2,RELA
TWIST2		transcription regulator				1.33E-02	BIN1,FN1,RELA
4-methylnitrosoamino-1-(3-pyridinyl)-1-butanone		chemical toxicant				1.33E-02	EZH2,RELA,TP53I3
parthenolide		chemical drug				1.33E-02	HMOX1,RELA,SOD2
IL2		cytokine		-0.418		1.34E-02	BAX,CD38,CDK2,CTPS1,CTSC,EPHX1,HMGCS1,JAK1,KPNA1,NDRG1,PHGDH,RDH11,SLC7A5,STAT5B,STMN1
5-azacytidine		chemical drug		-0.412		1.36E-02	EZH2,HEXIM1,MECP2,MYO1B,NDRG1,SLC7A5
prednisolone		chemical drug		-1.238		1.36E-02	BAX,GAA,PFKP,RELA,SOD2,SQSTM1,STAT1
budesonide		chemical drug		0.000		1.37E-02	AURKB,HECTD1,INPP4B,KIF21A,MGLL,MUC5AC,NAMPT,RAP1GAP
BCR-ABL1		fusion gene/product		-1.109		1.37E-02	AURKB,HMOX1,PFKP,RELA
mannitol		chemical - endogenous mammalian				1.40E-02	FN1,SOD2
C1QTNF1		other				1.40E-02	FN1,SOD2
PHLPP2		enzyme				1.40E-02	CPT1A,SQSTM1
necrostatin-1		chemical reagent				1.40E-02	RELA,SQSTM1
p85 (pik3r)		group				1.40E-02	NDRG1,RELA
AKR1B1		enzyme				1.40E-02	CPT1A,MUC5AC
protectin D1		chemical - endogenous mammalian				1.40E-02	BAX,HMOX1
PARP1		enzyme		-0.714		1.40E-02	BAX,HMOX1,PEG10,RELA,STAT1
JAK3		kinase				1.41E-02	ABCG2,BAX,CDK2
IKBKE		kinase		0.975	bias	1.42E-02	ENO3,PHGDH,PSPH,STAT1
KDM1A		enzyme		-0.555		1.47E-02	CTSC,CTSZ,EPHX1,FN1,HMOX1,IQGAP2,MCM2,MYO1B,SERPINB1
chloroquine		chemical drug		-0.919		1.47E-02	AGR2,BAX,FN1,SQSTM1
elaidic acid		chemical - endogenous mammalian		-1.982	bias	1.47E-02	ACAT2,HMGCS1,LSS,PHGDH
ritonavir		chemical drug				1.48E-02	ACAT2,CEACAM6,PLEC,RACGAP1,RDH11
dasatinib		chemical drug				1.48E-02	CCNB1,FN1,SQSTM1
ALB		transporter				1.48E-02	FN1,RELA,SQSTM1
filgrastim		biologic drug		-0.095		1.49E-02	CEACAM6,CYSTM1,DPYSL3,HPGD,LGALS3,MELTF,NECTIN2,SERPINB1,SQSTM1,STAT1
MYOD1		transcription regulator		-1.103		1.51E-02	BIN1,CDK2,ENO3,KIF4A,RACGAP1,STAT1,SUSD2
Pka		complex				1.52E-02	ANTXR1,BAX,CCNB1,CDK2,HMOX1
TFAP2A		transcription regulator		-1.067		1.52E-02	BAX,DCBLD2,EZH2,PSAP,SOD2
ATF2		transcription regulator				1.53E-02	ACTB,FN1,RELA,SOD2
desmopressin		biologic drug				1.53E-02	ACTB,LMNA,RAP1GAP,TJP2
3-deoxy-2-octulosonic acid(2)-lipid A		chemical - endogenous non-mammalian				1.55E-02	HMGCS1,LSS
Rp-cAMPS		chemical - kinase inhibitor				1.55E-02	ALDH2,HMOX1
C2CD5		other				1.55E-02	CPT1A,PNPLA2
oridonin		chemical drug				1.55E-02	BAX,HMOX1
CYTOR		other				1.55E-02	SOD2,STAT1
RHOJ		enzyme				1.55E-02	AKAP12,GSN
PROM1		other				1.55E-02	HMGCS1,LSS
volasertib		chemical drug				1.55E-02	KIF23,MCM2
NEDD4		enzyme				1.55E-02	FN1,SOD2
acetyl-L-carnitine		chemical - endogenous mammalian				1.55E-02	BAX,CPT1A
helenalin		chemical - endogenous non-mammalian				1.55E-02	HMOX1,RELA
taxifolin		chemical - endogenous non-mammalian				1.55E-02	HMOX1,SOD2
melphalan		chemical drug				1.55E-02	ABCG2,BAX
PAX3		transcription regulator				1.56E-02	GLDC,HSPG2,LNPEP,NNMT,PHGDH,TJP2
SRF		transcription regulator		-0.071		1.56E-02	ACTB,ACTN1,AKAP12,BICC1,GSN,HMOX1,HSPG2,MYO1B,TJP2
roscovitine		chemical drug				1.56E-02	CCNB1,CDK2,FN1
SRC (family)		group				1.56E-02	FN1,ITGAV,STAT1
temozolomide		chemical drug				1.56E-02	BAX,ITGAV,SOD2
PF543		chemical drug				1.56E-02	ACTB,FN1,GADD45GIP1
UQCC3		other				1.56E-02	ATP5F1C,ATP6AP1,ENO3,NDUFV3,UQCRH
HGF		growth factor		-1.744		1.59E-02	ABCG2,AKAP12,AURKB,CDK2,CSE1L,FN1,HMOX1,ITPR3,MCM2,NAMPT,SOD2
KAT5		transcription regulator	Activated	2.433		1.59E-02	BAX,CRELD2,HEXIM1,PSPH,SOD2,STX4
NFKB1		transcription regulator		-0.371	bias	1.60E-02	BAX,FN1,HMOX1,MUC5AC,NAMPT,RELA,SOD2,STAT1
RPTOR		other	Inhibited	-2.236		1.61E-02	CDK2,GSTK1,HMGCS1,LSS,SQSTM1
TLR2		transmembrane receptor		0.199		1.63E-02	BAX,FN1,HMOX1,MUC5AC,RELA,SQSTM1
DYSF		other				1.64E-02	FN1,LGALS3,PRPF4B,PSAP
SREBF2		transcription regulator		-1.067	bias	1.64E-02	CYB5A,HMGCS1,LSS,RDH11
CKAP2L		other				1.65E-02	AURKB,CCNB1,KIF23
NLRX1		other				1.65E-02	CHUK,RELA,STAT1
YTHDF1		other				1.65E-02	CTSZ,DDB2,FN1
MMP1		peptidase				1.65E-02	BAX,CDK2,FN1
N-formyl-Met-Leu-Phe		chemical reagent				1.65E-02	ACTN1,ANLN,KIF23
FOS		transcription regulator	Activated	2.338		1.68E-02	ANXA4,CTNND1,DOCK1,FN1,HMOX1,HPGD,LGALS3,NAMPT,PRPF4B,PSMA2,RAP1GAP,STMN1
LEP		growth factor		-0.041		1.68E-02	BAX,CPS1,CPT1A,CYB5A,FN1,FTO,MUC5AC,NAMPT,PNPLA2,RELA,SOD2
EGF		growth factor		-0.831		1.69E-02	ABCG2,ACTN1,ADA,AURKB,CCNB1,CDK2,FN1,HMGCS1,HMOX1,HPGD,MUC5AC,RELA,STAT1
doxycycline		chemical drug		1.000		1.69E-02	CD38,CDK2,MUC5AC,SOD2
Sos		group				1.70E-02	CTNND1,DOCK1,HMOX1,PRPF4B,RAP1GAP,STMN1
PRL		cytokine		-0.049		1.71E-02	ABCG2,ACTB,CCNB1,FN1,MFGE8,PGRMC1,STAT1,TECR
kawain		chemical - endogenous non-mammalian				1.71E-02	HMOX1,SOD2
TMBIM6		other				1.71E-02	HMOX1,WFS1
NAB2		transcription regulator				1.71E-02	BCAR1,FN1
TP53COR1		other				1.71E-02	BAX,SOD2
HNRNPAB		enzyme				1.71E-02	AURKB,CDK2
antimycin A		chemical - endogenous non-mammalian				1.71E-02	CCNB1,SOD2
FDI6		chemical reagent				1.71E-02	CCNB1,CDK2
SQSTM1	-0.398	transcription regulator				1.73E-02	HMOX1,PTGES2,RELA
PLK1		kinase				1.73E-02	BAX,MCM2,SMAD4
MYBL2		transcription regulator				1.73E-02	CCNB1,CDK2,CLTA
carbamazepine		chemical drug				1.73E-02	PSPH,SOD2,SQSTM1
Am 580		chemical reagent				1.73E-02	CPT1A,HMGCS1,LSS
IL1B		cytokine		0.288		1.74E-02	ABCG2,ANTXR1,ANXA4,BAX,CTSZ,FN1,GNL1,H1-10,HMOX1,HSPG2,ITGAV,MGLL,MUC5AC,NAMPT,PFKP,RACGAP1,RELA,SOD2,STAT1,TJP2
triptolide		chemical drug		-0.156	bias	1.74E-02	AKAP12,BAX,CD38,HPGD,RELA
bee venom		chemical - endogenous non-mammalian				1.75E-02	CCNB1,DDX27,ITGAV,KIF23
N-acetyl-L-cysteine		chemical drug		-0.187		1.75E-02	BAX,HMOX1,MUC5AC,PHGDH,RELA,SMAD4,SOD2
TNFSF13B		cytokine		1.172		1.79E-02	AURKB,BAX,BCAR1,HPGD,NAMPT
SFRP1		transmembrane receptor				1.82E-02	BAX,FN1,NAMPT
CD 437		chemical drug		1.664	bias	1.82E-02	ATP5F1C,BAX,RPL24,STOML2,UBE2M,UQCRH
Interferon alpha		group		-0.452		1.84E-02	ALDH2,CD38,CRELD2,EZH2,GLS,HMOX1,JAK1,LGALS3,RELA,SERPINB1,SHTN1,STAT1
MDM2		transcription regulator		-1.026		1.87E-02	BAX,EZH2,RELA,TP53I3
Irgm1		other		1.982	bias	1.87E-02	AURKB,CCNB1,SQSTM1,STAT1
MUC1		other		-0.117		1.87E-02	RELA,SMARCC1,SOD2,STAT1
IMD-0354		chemical reagent				1.88E-02	CCNB1,SOD2
PPOX		enzyme				1.88E-02	ENO3,UQCRH
PTP4A3		phosphatase				1.88E-02	FN1,STMN1
MGLL	0.871	enzyme				1.88E-02	CPT1A,PNPLA2
RND3		enzyme				1.88E-02	BAX,FN1
CREB3L1		transcription regulator				1.88E-02	AGR2,PAPSS2
NR6A1		ligand-dependent nuclear receptor				1.88E-02	GLS,LMNA
mangiferin		chemical - endogenous non-mammalian				1.88E-02	BAX,HMOX1
halofuginone		chemical drug				1.88E-02	AKAP12,ANXA4,CDH17,EPHX1,FN1
SPP1		cytokine	Inhibited	-2.219		1.90E-02	ABCG2,BAX,CDK2,FN1,HMOX1,ITGAV
SIRT1 inhibitor III		chemical drug				1.91E-02	BAX,FN1,RELA
mir-30		microRNA				1.91E-02	BAX,GLDC,NEDD4L
Vegf		group		-1.461		1.93E-02	AKAP12,AURKB,BAX,CDK2,CSE1L,DCBLD2,FN1,HMOX1,ITPR3,MCM2,NAMPT
EIF2AK3		kinase				1.93E-02	CTSC,NDRG1,SQSTM1,TBCE,WFS1
lovastatin		chemical drug		-1.953		1.93E-02	ACAT2,BCAR1,HMGCS1,HMOX1,LMNA
TCOF1		transcription regulator				1.94E-02	NDRG1,QRICH1,SH3BGRL,TBRG4
bezafibrate		chemical drug		0.762		1.94E-02	CCNB1,CYB5A,LGALS3,MGLL
oleic acid		chemical - endogenous mammalian		1.400		1.98E-02	BAX,CD38,HMOX1,PNPLA2,SOD2
CLU		other				2.00E-02	BAX,RELA,STAT1
luteolin		chemical drug				2.00E-02	BAX,HMOX1,SOD2
SIRT6		enzyme				2.00E-02	FN1,LSS,RPS15A,SOD2
mir-29		microRNA		1.156	bias	2.00E-02	AKT2,CTNND1,FN1,GLDC
NCOA3		transcription regulator		-1.969	bias	2.00E-02	CCNB1,CDK2,HMOX1,PSMA2
GS-444217		chemical drug				2.01E-02	FN1
guanosine		chemical - endogenous mammalian				2.01E-02	HMOX1
cerebroside 3-sulfate		chemical - endogenous mammalian				2.01E-02	ITGAV
eleutherococcus senticosus extract		chemical drug				2.01E-02	PNPLA2
Clock-Bmal1		complex				2.01E-02	NAMPT
Mellitin		chemical - endogenous non-mammalian				2.01E-02	BAX
VX-944		chemical drug				2.01E-02	BAX
atiprimod		chemical drug				2.01E-02	BAX
BayCysLT2		chemical reagent				2.01E-02	RELA
PYDC2		other				2.01E-02	RELA
CP-724,714		chemical drug				2.01E-02	PHGDH
prunetin		chemical - endogenous non-mammalian				2.01E-02	MUC5AC
2-methoxycinnamaldehyde		chemical - endogenous non-mammalian				2.01E-02	HMOX1
Rbx1		enzyme				2.01E-02	CCNB1
PLEKHM1		other				2.01E-02	SQSTM1
ZBTB2		transcription regulator				2.01E-02	RELA
TCHP		other				2.01E-02	SQSTM1
ZFAT		transcription regulator				2.01E-02	SQSTM1
FAM168A		other				2.01E-02	CCNB1
RBM17		other				2.01E-02	FN1
GFRAL		transmembrane receptor				2.01E-02	PNPLA2
API5		other				2.01E-02	CDK2
AVL9		other				2.01E-02	CCNB1
MAGEA2/MAGEA2B		other				2.01E-02	BAX
PCDH9		other				2.01E-02	BAX
CENPL		other				2.01E-02	CDK2
BHLH		group				2.01E-02	RAP1GAP
ADH5		enzyme				2.01E-02	LGALS3
PHOSPHO1		enzyme				2.01E-02	PSPH
arecaidine propargyl ester		chemical reagent				2.01E-02	ABCG2
bucillamine		chemical drug				2.01E-02	BAX
hyaluronidase		group				2.01E-02	FN1
MYO1C	-0.379	enzyme				2.01E-02	GSN
CPI-613		chemical drug				2.01E-02	GLS
safflor yellow B		chemical - endogenous non-mammalian				2.01E-02	BAX
DGKD		kinase				2.01E-02	CCNB1
ASNS		enzyme				2.01E-02	SLC7A5
BCL2L2-PABPN1		other				2.01E-02	BAX
16:0/20:4 phosphatidylcholine		chemical - endogenous mammalian				2.01E-02	CCNB1
mir-663		microRNA				2.01E-02	HSPG2
SALL2		transcription regulator				2.01E-02	BAX
ALMS1-IT1		other				2.01E-02	CCNB1
NOXO1		other				2.01E-02	SOD2
CST7		other				2.01E-02	SQSTM1
HPS1		other				2.01E-02	LGALS3
ULK2		kinase				2.01E-02	SQSTM1
SHMT2		enzyme				2.01E-02	AKT2
PLIN3		other				2.01E-02	BAX
NKIRAS1		enzyme				2.01E-02	CHUK
MUC16		other				2.01E-02	CCNB1
IBTK		other				2.01E-02	SQSTM1
ADAMTS13		peptidase				2.01E-02	LGALS3
COMP		other				2.01E-02	LGALS3
SVIL		other				2.01E-02	ANLN
ING5		other				2.01E-02	CDK2
CDC23		enzyme				2.01E-02	CCNB1
KHDRBS2		other				2.01E-02	STAT1
GPBP1		transcription regulator				2.01E-02	ADA
CYP24A1		enzyme				2.01E-02	CCNB1
PRIMA1		other				2.01E-02	BAX
2-methoxy-N-(3-methyl-2-oxo-1,4-dihydroquinazolin-6-yl)benzenesulfonamide		chemical reagent				2.01E-02	AURKB
PRSS3		peptidase				2.01E-02	PSAP
LOC100359583/Ptma		other				2.01E-02	BAX
RANBP2		enzyme				2.01E-02	FN1
Anp32e		other				2.01E-02	FN1
nexrutine		chemical drug				2.01E-02	RELA
NRIR		other				2.01E-02	CCNB1
BMS-863233		chemical drug				2.01E-02	MCM2
PFK-15		chemical reagent				2.01E-02	BAX
tyrosine kinase inhibitor		chemical drug				2.01E-02	FN1
S7		chemical drug				2.01E-02	BAX
SI163		chemical drug				2.01E-02	BAX
S29		chemical drug				2.01E-02	BAX
reactive nitrogen species		chemical - other				2.01E-02	BAX
daphnoretin		chemical - endogenous non-mammalian				2.01E-02	BAX
XK469		chemical drug				2.01E-02	BAX
BIBX1522		chemical drug				2.01E-02	MUC5AC
CGP77675		chemical drug				2.01E-02	FN1
AN-207		chemical toxicant				2.01E-02	BAX
glyoxal		chemical toxicant				2.01E-02	BAX
SSR180575		chemical drug				2.01E-02	BAX
E 3330		chemical drug				2.01E-02	RELA
4-nitrophenol		chemical - endogenous mammalian				2.01E-02	BAX
heme arginate		chemical drug				2.01E-02	HMOX1
fascaplysin		chemical drug				2.01E-02	CPT1A
chitosan oligosaccharide		chemical - endogenous mammalian				2.01E-02	RELA
all-trans-4-Oxo-retinoic acid		chemical - endogenous mammalian				2.01E-02	CD38
isoalantolactone		chemical - endogenous non-mammalian				2.01E-02	BAX
luteolin 7-O-beta-D-glucoside		chemical - endogenous non-mammalian				2.01E-02	HMOX1
swainsonine		chemical - endogenous non-mammalian				2.01E-02	BAX
N(6)-carboxymethyl-L-lysine		chemical - endogenous mammalian				2.01E-02	FN1
ceapin-A7		chemical reagent				2.06E-02	CRELD2,DNAJB11
glycine		chemical - endogenous mammalian				2.06E-02	PHGDH,PSPH
sitagliptin		chemical drug				2.06E-02	FN1,LGALS3
IgG1		complex				2.06E-02	BAX,ITGAV
HSP90AA1		enzyme				2.06E-02	FN1,SMAD4
ZNF148		transcription regulator				2.06E-02	FN1,STAT1
mir-515		microRNA				2.06E-02	RELA,SMAD4
TNFRSF11A		transmembrane receptor				2.06E-02	FN1,RELA
ITGA6		transmembrane receptor				2.06E-02	BAX,RELA
MAP3K5		kinase				2.06E-02	BAX,HMOX1
IND S1		chemical - kinase inhibitor				2.06E-02	ACTB,COPS8
PTPN3		phosphatase				2.06E-02	FN1,ITGAV
NSC23766		chemical reagent				2.06E-02	FN1,HMOX1
coenzyme Q10		chemical drug				2.06E-02	BAX,HMOX1
V-PYRRO/NO		chemical reagent				2.06E-02	HMOX1,RELA
probucol		chemical drug				2.06E-02	HMOX1,PSMA2
idarubicin		chemical drug				2.06E-02	BAX,FDXR
farnesol		chemical reagent				2.06E-02	CCNB1,CDK2
PSEN2		peptidase		1.000		2.06E-02	ACTB,BAX,CTSC,CTSZ
hemin		chemical - endogenous mammalian				2.06E-02	FN1,HMOX1,PROCR,RELA
1,1-diarylethylene-diammonium derivative		chemical reagent				2.09E-02	AURKB,CCNB1,STAT1
RBL2		other				2.13E-02	AURKB,CCNB1,MARK2,STMN1
CGA		other		-1.000		2.13E-02	BAX,CRELD2,DNAJB11,HEXIM1
CAV1		transmembrane receptor		-1.000		2.18E-02	FN1,HMOX1,NEDD4L,SMAD4,TJP2
miR-27a-3p (and other miRNAs w/seed UCACAGU)		mature microRNA				2.19E-02	BAX,PNPLA2,SMAD4
PIM1		kinase				2.19E-02	ABCG2,CCNB1,CD38
telmisartan		chemical drug				2.19E-02	ACE2,BAX,CPT1A
EP300		transcription regulator		0.602	bias	2.23E-02	AKAP12,BAX,CDK2,CPT1A,FN1,HMOX1,LMNA,NDRG1,SOD2,WFS1
zidovudine		chemical drug				2.24E-02	CPT1A,STAT1
A-769662		chemical reagent				2.24E-02	CPS1,FN1
NADPH oxidase		complex				2.24E-02	HMOX1,MUC5AC
C1QBP		transcription regulator				2.24E-02	NAMPT,SQSTM1
KIF3A		enzyme				2.24E-02	ACAT2,HMGCS1
epirubicin		chemical drug				2.24E-02	ACE2,BAX
CHUK	-1.304	kinase		-0.128	bias	2.24E-02	CCNB1,CHUK,CTSZ,HMOX1,RELA,SQSTM1
RANBP3L		other				2.28E-02	ALDH2,GSTK1,HEBP2
SGPL1		enzyme				2.28E-02	ABCG2,BAX,ITPR3
thioctic acid		chemical drug				2.28E-02	BAX,HMOX1,SOD2
acyline		biologic drug				2.34E-02	BAX,RPL15,RPL24,RPS15A
miR-146a-5p (and other miRNAs w/seed GAGAACU)		mature microRNA		0.796	bias	2.34E-02	CHUK,PTGES2,RELA,STAT1
phenethyl isothiocyanate		chemical drug				2.34E-02	BAX,GSTK1,JAK1,NNMT
FN1	1.473	enzyme		-1.228		2.38E-02	FN1,ITGAV,MARCKS,SQSTM1,TOMM22,TOR1A
TNFRSF8		transmembrane receptor				2.38E-02	CTSC,MRTO4,RELA
IFNAR1		transmembrane receptor				2.40E-02	FN1,HMGCS1,ITGAV,SOD2,STAT1
HAVCR1		other		0.762		2.41E-02	CTPS1,NAMPT,PEG10,STAT1
wortmannin		chemical drug		1.659		2.42E-02	BAX,CDK2,FN1,HMOX1,OGT,SQSTM1
UHRF2		enzyme				2.42E-02	CRIP2,CSE1L
SH3PXD2A-AS1		other				2.42E-02	ANLN,TP53I3
mir-101		microRNA				2.42E-02	EZH2,STMN1
CCAT2		other				2.42E-02	BAX,GLS
CYP27A1		enzyme				2.42E-02	HMGCS1,LSS
DYRK1A		kinase				2.42E-02	CCNB1,KNTC1
RAPGEF3		other				2.42E-02	FN1,MUC5AC
FABP1		transporter				2.42E-02	HMOX1,PNPLA2
diallyl trisulfide		chemical - endogenous non-mammalian				2.42E-02	CCNB1,HMOX1
7-ketocholesterol		chemical - endogenous mammalian				2.42E-02	BAX,RELA
diosgenin		chemical - endogenous non-mammalian				2.42E-02	BAX,HMGCS1
Ni2+		chemical reagent				2.42E-02	NDRG1,PTGES2
isobutylmethylxanthine		chemical toxicant				2.47E-02	CDK2,FN1,NDUFV3,RAB18,SOD2,STAT1
RAF1		kinase		0.000	bias	2.47E-02	ACAT2,AKAP12,DCBLD2,LPGAT1,MGLL,PLEC
RHOA		enzyme				2.48E-02	ANLN,BAX,CCNB1,FN1
genistein		chemical drug		0.232		2.48E-02	ATP6AP1,BAX,CCNB1,HMOX1,HPGD,PSAP,RELA,SOD2,SQSTM1
NPM1		transcription regulator		0.320	bias	2.58E-02	DDB2,FN1,HMOX1,ITGAV,SOD2
PAX3-FOXO1		fusion gene/product		-0.478		2.58E-02	ACTN1,AKAP12,ANLN,CCT5,HMOX1,SERPINB1,SLC7A5
L-methionine		chemical - endogenous mammalian				2.59E-02	AURKB,CCNB1,SOD2
carbon monoxide		chemical - endogenous mammalian				2.59E-02	BAX,FN1,HMOX1
FAM83A		other				2.62E-02	BAX,PNPLA2
E2F5		transcription regulator				2.62E-02	AURKB,BAX
COMMD1		transporter				2.62E-02	PFKP,STAT1
TNFSF11		cytokine		-0.818	bias	2.63E-02	GLRX,HMOX1,ITGAV,RACGAP1,SOD2,STAT1,STMN1
metformin		chemical drug		1.562		2.63E-02	BAX,ENO3,FN1,HMGCS1,HMOX1,PROCR,SOD2
peptidoglycan		chemical - endogenous non-mammalian		1.131	bias	2.63E-02	HMOX1,MUC5AC,RELA,SOD2
phosphate		chemical - endogenous mammalian		0.235		2.63E-02	CPNE1,HMOX1,JAK1,PLEC
simvastatin		chemical drug		-0.122		2.67E-02	BAX,HMOX1,MUC5AC,RELA,SOD2,STAT1
miR-30c-5p (and other miRNAs w/seed GUAAACA)		mature microRNA		1.213	bias	2.70E-02	GLDC,MPDU1,NUFIP2,PLEC,SLC9A3R2
TNFAIP3		enzyme				2.70E-02	BAX,CHUK,RELA
ATP5IF1	-2.489	other				2.70E-02	ACAT2,SOD2,TECR
emodin		chemical drug				2.70E-02	BAX,FN1,SOD2
ARNT		transcription regulator				2.76E-02	AKT2,ALDH3A1,ITGAV,MYO1C,SOD2
EGR2		transcription regulator		-0.529		2.76E-02	ACAT2,ACTN1,GSN,HMGCS1,NDRG1,NUP54,TJP2
HMG20A		transcription regulator		0.152	bias	2.78E-02	ADRM1,HMGCS1,LSS,NNMT
GNA15		enzyme				2.78E-02	AKAP12,HMOX1,LGALS3,SOD2
RELA	0.366	transcription regulator		1.273		2.79E-02	ABCG2,BAX,FN1,HMOX1,INPP4B,MUC5AC,NAMPT,RELA,SMAD4,SOD2
SNCA		enzyme		0.447		2.80E-02	ANKRD28,BAX,GLDC,GSN,KIF4A,LMNA,RBP4,SERPINB1,SOD2
gentamicin		chemical drug		-1.211		2.81E-02	BAX,DDX50,HMOX1,LGALS3,MYO1B,PHGDH,RBP4,SQSTM1
tributyrin		chemical drug				2.81E-02	AKAP12,NDRG1,SOD2
secondhand smoke		chemical toxicant				2.81E-02	CCT5,JAK1,STAT1
E2F6		transcription regulator				2.81E-02	DCTN4,MCM2,POLA2
CDX1		transcription regulator				2.81E-02	ALDH3A1,MUC5AC,RELA
sulindac		chemical drug				2.81E-02	CCNB1,CDK2,SERPINB1
PHF1		transcription regulator				2.82E-02	BAX,TP53I3
IL31		other				2.82E-02	CCNB1,MUC5AC
CDC73		other				2.82E-02	LGALS3,STAT1
SLC2A4		transporter				2.82E-02	LNPEP,RBP4
HEXIM1	-0.512	transcription regulator				2.82E-02	ACE2,HEXIM1
FOXF2		transcription regulator				2.82E-02	CDK2,FN1
H-[1,2,4]oxadiazolo[4,3-alpha]quinoxalin-1-one		chemical reagent				2.82E-02	BAX,HMOX1
TAL1		transcription regulator		0.000		2.82E-02	CCNB1,DOCK1,LARP4B,MARCKS,MCM2,RELA
NOTCH1		transcription regulator		1.129		2.85E-02	CDK2,GAA,GLS,HMOX1,MUC5AC,RELA,SMARCC1
tetradecanoylphorbol acetate		chemical drug		1.257		2.88E-02	ACTB,AHCTF1,AURKB,BAX,BCAR1,GLS,H1-10,HMOX1,ITPR3,MECP2,MUC5AC,PES1,PHGDH,POLA2,PSMC3,RELA,SOD2,STAT1,STAT5B,TJP2
methylmercury		chemical toxicant				2.92E-02	BAX,HMOX1,MFGE8
KIT		transmembrane receptor				2.94E-02	HMOX1,JAK1,LGALS3,STAT1
bisindolylmaleimide I		chemical drug		-1.154	bias	2.94E-02	FN1,HMOX1,SOD2,TJP2
RICTOR		other		1.890		2.94E-02	ATP5F1C,ATP6AP1,BAX,NDUFV3,PSMA2,PSMC3,RPL14
alitretinoin		chemical drug		0.492		2.95E-02	CD38,CDK2,CYP4F11,FN1,HMGCS1
phosphatidylethanolamine		chemical - endogenous mammalian				3.00E-02	STAT1
PDGF receptor tyrosine kinase inhibitor IV		chemical drug				3.00E-02	FN1
L-tyrosine		chemical - endogenous mammalian				3.00E-02	BAX
3-aminoisobutanoate		chemical - endogenous mammalian				3.00E-02	CPT1A
L-ornithine		chemical - endogenous mammalian				3.00E-02	PNPLA2
7alpha-hydroxycholesterol		chemical - endogenous mammalian				3.00E-02	HMGCS1
extremely high molecular weight hyaluronic acid		chemical reagent				3.00E-02	BAX
Ewsr1		other				3.00E-02	LMNA
methysticin		chemical reagent				3.00E-02	HMOX1
MIR100HG		other				3.00E-02	FN1
CpG 10101		chemical drug				3.00E-02	STAT1
LINC01134		other				3.00E-02	DDB2
ZNF346		other				3.00E-02	BAX
NOMO1 (includes others)		other				3.00E-02	CTNND1
TTC5		other				3.00E-02	BAX
BIRC6		enzyme				3.00E-02	BAX
Il3r		complex				3.00E-02	NECTIN2
AKIP1		other				3.00E-02	BAX
LINC00924		other				3.00E-02	CPT1A
MSRA		enzyme				3.00E-02	HMOX1
MCTS1		other				3.00E-02	SOD2
USP50		peptidase				3.00E-02	CPT1A
RPS6KA		group				3.00E-02	FN1
METTL7B		enzyme				3.00E-02	HMOX1
OXGR1		G-protein coupled receptor				3.00E-02	PNPLA2
2-(3-chlorophenylamino)phenylacetic acid		chemical drug				3.00E-02	FN1
CKLF		cytokine				3.00E-02	BAX
MINDY3		enzyme				3.00E-02	CDK2
SDF4		other				3.00E-02	BAX
TMEM106B		other				3.00E-02	SQSTM1
UBE2D3		enzyme				3.00E-02	SMAD4
Fetal Hemoglobin		complex				3.00E-02	HMOX1
GEM231		chemical drug				3.00E-02	BAX
cerebrolysin		chemical drug				3.00E-02	BAX
ZMAT3		other				3.00E-02	BAX
RNF144B		enzyme				3.00E-02	BAX
vistusertib		chemical drug				3.00E-02	HMOX1
GSK461364		chemical drug				3.00E-02	MCM2
IVNS1ABP		other				3.00E-02	SOD2
MAT2B		enzyme				3.00E-02	HMOX1
COL3A1		other				3.00E-02	FN1
GSTA4		enzyme				3.00E-02	CCNB1
FBXL20		other				3.00E-02	BAX
miR-520g-3p (and other miRNAs w/seed CAAAGUG)		mature microRNA				3.00E-02	ABCG2
miR-424-3p (miRNAs w/seed AAAACGU)		mature microRNA				3.00E-02	LGALS3
mir-368		microRNA				3.00E-02	SMAD4
apitolisib		chemical drug				3.00E-02	NDRG1
SEC23B		transporter				3.00E-02	BAX
ACS84		chemical reagent				3.00E-02	HMOX1
AP2A2		transporter				3.00E-02	BAX
RBFOX1		other				3.00E-02	GSN
PES1	-0.494	other				3.00E-02	HMOX1
ERCC6		transcription regulator				3.00E-02	LGALS3
Lycium barbarum polysaccharides		chemical - endogenous non-mammalian				3.00E-02	SOD2
CLCA1		ion channel				3.00E-02	MUC5AC
MT3		other				3.00E-02	BAX
GBP2		enzyme				3.00E-02	FN1
GK		kinase				3.00E-02	ENO3
Naip1 (includes others)		other				3.00E-02	MUC5AC
GBP3		enzyme				3.00E-02	SQSTM1
UIMC1		other				3.00E-02	BAX
HILPDA		other				3.00E-02	PNPLA2
COPS6		other				3.00E-02	PHGDH
AIM-100		chemical reagent				3.00E-02	SQSTM1
3K3A-APC protein		biologic drug				3.00E-02	RELA
UBE2D2		enzyme				3.00E-02	SMAD4
(E)-1-(2-nitrovinyl)naphthalene		chemical reagent				3.00E-02	SQSTM1
(E)-9-(2-nitrovinyl)anthracene		chemical reagent				3.00E-02	SQSTM1
norcantharidin		chemical reagent				3.00E-02	SOD2
temuterkib		chemical drug				3.00E-02	HMOX1
OPC-13213		chemical reagent				3.00E-02	BAX
methoxyacetic acid		chemical toxicant				3.00E-02	SQSTM1
mivebresib		chemical drug				3.00E-02	HEXIM1
tempo		chemical reagent				3.00E-02	HMOX1
fomepizole		chemical drug				3.00E-02	HMOX1
methacholine		chemical drug				3.00E-02	FN1
GSK-3beta inhibitor II		chemical drug				3.00E-02	BAX
LFM-A13		chemical drug				3.00E-02	HMOX1
fosbretabulin		chemical drug				3.00E-02	CCNB1
(S)-duloxetine		chemical drug				3.00E-02	ACTB
ofloxacin		chemical drug				3.00E-02	BAX
N-methylsulfonyl-12,12-dibromododec-11-enamide		chemical reagent				3.00E-02	FN1
NSC63002		chemical - kinase inhibitor				3.00E-02	CDK2
NSC43067		chemical - kinase inhibitor				3.00E-02	CDK2
NSC269621		chemical - kinase inhibitor				3.00E-02	CDK2
silver nitrate		chemical drug				3.00E-02	HMOX1
lanthanum chloride		chemical reagent				3.00E-02	BAX
MitoBloCK-6		chemical drug				3.00E-02	PSPH
lead nitrate		chemical toxicant				3.00E-02	BAX
nickel subsulfide		chemical toxicant				3.00E-02	NDRG1
imisopasem manganese		chemical drug				3.00E-02	BAX
oleuropein aglycone		chemical - endogenous non-mammalian				3.00E-02	SQSTM1
Schiff base zinc (II) derivative complex		chemical reagent				3.00E-02	BAX
L-JNK inhibitor I		chemical reagent				3.00E-02	HMOX1
GNE-317		chemical drug				3.00E-02	NDRG1
quinine		chemical drug				3.00E-02	HMOX1
alpha-ergocryptine		chemical toxicant				3.00E-02	PGRMC1
CDP ethanolamine		chemical - endogenous mammalian				3.00E-02	BAX
stavudine		chemical drug				3.00E-02	CPT1A
NCGC00378430		chemical reagent				3.00E-02	FN1
epiallopregnanolone		chemical - endogenous mammalian				3.00E-02	LGALS3
EBF1		transcription regulator	Inhibited	-2.219		3.01E-02	AKT2,CHUK,LNPEP,PFKP,STAT1
TNFRSF1A		transmembrane receptor		1.406		3.01E-02	CD38,KNTC1,RELA,SOD2,SQSTM1
peoniflorin		chemical drug				3.02E-02	CLTA,HMOX1
PADI2		enzyme				3.02E-02	FN1,RELA
HSPB1		other				3.02E-02	CCNB1,RELA
FABP3		transporter				3.02E-02	FN1,SOD2
ECSIT		transcription regulator				3.02E-02	HMOX1,SOD2
FGF9		growth factor				3.02E-02	BAX,HMOX1
GW7647		chemical drug				3.02E-02	ABCG2,CPT1A
4-nitroquinoline-1-oxide		chemical toxicant				3.02E-02	AURKB,CCNB1
K-252		chemical drug				3.02E-02	NDRG1,SOD2
WR 1065		chemical drug				3.02E-02	BAX,DDB2
MCC950		chemical reagent				3.02E-02	LMNA,MUC5AC
rifaximin		chemical drug				3.02E-02	CPS1,NDRG1
tauroursodeoxycholic acid		chemical - endogenous mammalian				3.02E-02	BAX,RELA
glutamine		chemical - endogenous mammalian				3.02E-02	ACTB,ADA,ADSS2,FN1
FOXO4		transcription regulator		1.981		3.02E-02	HMGCS1,NAMPT,SERPINB1,SOD2
EHMT1		transcription regulator		1.000	bias	3.02E-02	ALDH2,CD38,CYB5A,SOD2
PRKN		enzyme				3.02E-02	CCNB1,CPT1A,FN1,SQSTM1
arsenite		chemical toxicant				3.02E-02	ALDH3A1,HMOX1,PTGES2,SQSTM1
PDK1		kinase				3.04E-02	CCNB1,CD38,GSTK1
Go 6976		chemical drug				3.04E-02	FN1,HMOX1,SOD2
HNF1B		transcription regulator		1.000		3.08E-02	ACTN1,AGR2,ANXA4,FN1,SMARCC1
raloxifene		chemical drug		-1.342		3.08E-02	CCNB1,HMOX1,MYO1B,NDRG1,RAP1GAP
HDAC1		transcription regulator		0.069		3.14E-02	AKAP12,BAX,CCNB1,CDK2,CEACAM6,FN1,SQSTM1
KL		enzyme				3.16E-02	BAX,FN1,SOD2
Gcg		other				3.16E-02	CPS1,CTSC,NNMT
trovafloxacin		chemical drug				3.16E-02	HMOX1,NEDD4L,SOD2
3,3'-diindolylmethane		chemical drug				3.16E-02	BAX,HMOX1,RELA
cytarabine		chemical drug				3.16E-02	BAX,CCNB1,FDXR
TCF4		transcription regulator		0.378		3.19E-02	ADA,CD38,CRELD2,HSPBP1,MRTO4,RACGAP1,SERPINB1,SMAD4
DDX5		enzyme		1.000		3.19E-02	ATP5F1C,BAX,HMOX1,UQCRH
CDX2		transcription regulator		-0.128		3.21E-02	ALDH3A1,CDH17,MARK2,MUC5AC,RELA
SB203580		chemical drug		-0.594	bias	3.22E-02	BAX,CCNB1,FN1,GLRX,HMOX1,MUC5AC,NAMPT,RELA,SOD2,STAT1
lipofermata		chemical reagent				3.23E-02	CPT1A,FN1
MC4R		G-protein coupled receptor				3.23E-02	PNPLA2,PSMA2
BTRC		enzyme				3.23E-02	RELA,SMAD4
HDAC9		transcription regulator				3.23E-02	BAX,CCNB1
IAPP		other				3.23E-02	HMGCS1,LMNA
SLC2A1		transporter				3.23E-02	FN1,HMOX1
IND S7		chemical - kinase inhibitor				3.23E-02	ACTB,COPS8
TRIM21		enzyme				3.23E-02	HMOX1,PNPO
SMARCC1	-0.444	transcription regulator				3.23E-02	SMARCC1,SOD2
PRKCB		kinase				3.28E-02	BAX,FN1,SOD2
EFNA1		other				3.28E-02	DCBLD2,FN1,NEDD4L
PTP4A1		phosphatase		0.762		3.28E-02	ACTN1,BAX,STMN1,TUBA1C
PTGS2		enzyme		-1.477		3.32E-02	BAX,FN1,ITGAV,PSAP,PTGES2,STAT5B
Collagen type I (complex)		complex				3.40E-02	BAX,FN1,ITGAV
TSLP		cytokine				3.40E-02	JAK1,SQSTM1,TJP2
rotenone		chemical toxicant				3.40E-02	BAX,HMOX1,SOD2
NFkB (complex)		complex		1.245	bias	3.43E-02	ANXA13,BAX,CCNB1,FN1,HMOX1,ITGAV,MUC5AC,NAMPT,RELA,SLC7A5,SOD2,STX4
trans-cinnamaldehyde		chemical drug				3.45E-02	CCNB1,HMOX1
RAD21L1		other				3.45E-02	PLEC,SQSTM1
SH3TC2		other				3.45E-02	HMGCS1,LSS
MAP3K12		kinase				3.45E-02	ACTB,STMN1
miR-223-3p (miRNAs w/seed GUCAGUU)		mature microRNA				3.45E-02	CHUK,STMN1
SUB1		transcription regulator				3.45E-02	BAX,KNTC1
STAG3		other				3.45E-02	PLEC,SQSTM1
MEL S3		chemical - kinase inhibitor				3.45E-02	ACTB,COPS8
NPC2		transporter				3.45E-02	SQSTM1,STAT1
7(R)-maresin 1		chemical - endogenous mammalian				3.45E-02	HMOX1,STAT1
acteoside		chemical - endogenous non-mammalian				3.45E-02	BAX,HMOX1
methylnitronitrosoguanidine		chemical toxicant				3.45E-02	BAX,TP53I3
isoflurane		chemical drug				3.45E-02	BAX,HMOX1
deoxynivalenol		chemical toxicant				3.45E-02	CCNB1,PAPSS2
paraquat		chemical toxicant				3.45E-02	BAX,FN1,HMOX1,RELA
mir-133		microRNA				3.52E-02	CCNB1,FN1,LPGAT1
FASN		enzyme				3.52E-02	PNPLA2,RBP4,RELA
ITGB3		transmembrane receptor				3.52E-02	FN1,ITGAV,RTN4RL2
TGFB2		growth factor		0.376		3.54E-02	FN1,HMOX1,HSPG2,SMAD4
nicotine		chemical drug		-0.868		3.56E-02	FN1,HMOX1,JAK1,LGALS3,RELA,STAT1
SMAD4	-1.634	transcription regulator		-0.776		3.60E-02	ABCG2,AGR2,ATP5IF1,FN1,HMOX1,NAMPT,SMAD4
MTOR		kinase		-1.387		3.60E-02	CTNND1,FN1,PFKP,PGRMC1,RELA,SERPINB1,SQSTM1,STAT1
TARDBP		transcription regulator		-1.982		3.63E-02	ACAT2,HMGCS1,LSS,SQSTM1
infliximab		biologic drug				3.65E-02	MYO1B,NAMPT,SLC7A5
PLAU		peptidase				3.65E-02	FN1,ITGAV,SERPINB1
STK11		kinase		-1.085		3.65E-02	ATP5F1C,CPS1,CTPS1,FN1,PHGDH,POLA2,SOD2
POLG		enzyme				3.67E-02	CYB5A,RPL14
olaparib		chemical drug				3.67E-02	BAX,CCNB1
CASP3		peptidase				3.67E-02	BAX,CDK2
GCK		kinase				3.67E-02	ATP5F1C,CPT1A
GDF15		growth factor				3.67E-02	CTNND1,PNPLA2
BGN		other				3.67E-02	BAX,CDK2
SMC1B		transporter				3.67E-02	PLEC,SQSTM1
VAV3		cytokine				3.67E-02	BAX,RELA
pirfenidone		chemical drug				3.67E-02	FN1,SMAD4
ramipril		chemical drug				3.67E-02	ACE2,FN1
R-WIN 55,212		chemical reagent				3.67E-02	BAX,CDK2
bardoxolone methyl		chemical drug				3.67E-02	HMOX1,RELA
cannabidiol		chemical drug				3.67E-02	FN1,SQSTM1
phytohemagglutinin		chemical drug		-1.195	bias	3.71E-02	AKT2,ALDH2,CPS1,DRG2,HPGD,KIF23,STAT1
PTH		other		-1.195		3.71E-02	FN1,ITGAV,LMNA,RAP1GAP,TJP2
KCNJ2		ion channel		1.000	bias	3.73E-02	CROCC,IQGAP2,KIF21A,PLEC
KDM8		enzyme				3.78E-02	ENO3,EZH2,LSS
SHC1		other				3.78E-02	BAX,SOD2,SQSTM1
caspase		group				3.90E-02	BAX,CDK2
MAPK11		kinase				3.90E-02	HMOX1,RELA
VAV1		transcription regulator				3.90E-02	BAX,RELA
CXCR3		G-protein coupled receptor				3.90E-02	FN1,HMOX1
LACTB		peptidase				3.90E-02	DPYSL3,FN1
TUG1		other				3.90E-02	BAX,CELF1
oltipraz		chemical drug				3.90E-02	ACE2,RELA
proteasome inhibitor PSI		chemical - protease inhibitor				3.90E-02	HMOX1,SQSTM1
epoxomicin		chemical - protease inhibitor				3.90E-02	PSMA2,SQSTM1
carbenoxolone		chemical toxicant				3.90E-02	BAX,MUC5AC
arsenic		chemical toxicant				3.90E-02	BAX,FTO
PTN		growth factor				3.91E-02	ACAT2,CPT1A,HMGCS1
5-hydroxytryptamine		chemical - endogenous mammalian				3.92E-02	BABAM2,BIN1,FN1,STX4
MAPK8		kinase		-0.068		3.93E-02	CDK2,HMGCS1,HMOX1,RELA,SOD2
sofalcone		chemical drug				3.98E-02	HMOX1
miR-98 inhibitor		chemical reagent				3.98E-02	FN1
choline plasmalogens		chemical - endogenous mammalian				3.98E-02	CDK2
flavokawain A		chemical - endogenous non-mammalian				3.98E-02	BAX
5-deoxy-rutaecarpine		chemical reagent				3.98E-02	RELA
heat-not-burn cigarette smoke extract		chemical toxicant				3.98E-02	HMOX1
BC-11		chemical reagent				3.98E-02	FN1
ML264		chemical reagent				3.98E-02	BAX
tyrosine kinase		group				3.98E-02	HMOX1
PLD		group				3.98E-02	FN1
15-LOX		group				3.98E-02	MUC5AC
yangonin		chemical - endogenous non-mammalian				3.98E-02	HMOX1
FEZF1		transcription regulator				3.98E-02	CDK2
Smad3-Smad4		complex				3.98E-02	BAX
Metalloprotease		group				3.98E-02	FN1
tozasertib		chemical drug				3.98E-02	BAX
tanshinone I		chemical - endogenous non-mammalian				3.98E-02	BAX
CC8490		chemical drug				3.98E-02	SOD2
ticrynafen		chemical drug				3.98E-02	HMOX1
DIRAS2		enzyme				3.98E-02	RELA
ZFP42		transcription regulator				3.98E-02	CDK2
GNL3L	-1.777	other				3.98E-02	BAX
DNAJB4		other				3.98E-02	STAT1
MYOT		other				3.98E-02	SQSTM1
WAPL		other				3.98E-02	MACROD1
SLC13A5		transporter				3.98E-02	CCNB1
DUOX1		enzyme				3.98E-02	MUC5AC
LAPTM4B		other				3.98E-02	BAX
USP24		peptidase				3.98E-02	BAX
ORAI3		other				3.98E-02	CDK2
cathepsin L inhibitor		chemical drug				3.98E-02	FTO
NDUFA4L2		enzyme				3.98E-02	BAX
SIRT5		enzyme				3.98E-02	GLS
XRN2		enzyme				3.98E-02	ACTB
LINC00173		other				3.98E-02	NDRG1
AZD7762		chemical drug				3.98E-02	CCNB1
nintedanib		chemical drug				3.98E-02	FN1
danusertib		chemical drug				3.98E-02	CCNB1
NCF2		enzyme				3.98E-02	SOD2
kahweol		chemical - endogenous non-mammalian				3.98E-02	HMOX1
MOAP1		other				3.98E-02	HMOX1
IBSP		other				3.98E-02	ITGAV
CELA2A		peptidase				3.98E-02	MUC5AC
PKIA		other				3.98E-02	FN1
miR-200a-5p (and other miRNAs w/seed AUCUUAC)		mature microRNA				3.98E-02	EZH2
mir-431		microRNA				3.98E-02	FN1
mir-340		microRNA				3.98E-02	MECP2
NNMT	0.529	enzyme				3.98E-02	FN1
BOK		other				3.98E-02	ITPR3
TOPORS		enzyme				3.98E-02	BAX
PDE4A		enzyme				3.98E-02	FN1
DUXAP8		other				3.98E-02	EZH2
TGFBI		other				3.98E-02	ITGAV
KPNA1	-1.996	transporter				3.98E-02	STAT1
GCN1		translation regulator				3.98E-02	CCNB1
ARSA		enzyme				3.98E-02	CCNB1
CHRM4		G-protein coupled receptor				3.98E-02	ITGAV
CASP14		peptidase				3.98E-02	PSAP
CELF2		other				3.98E-02	BAX
IRAK1BP1		other				3.98E-02	RELA
PTP4A2		phosphatase				3.98E-02	BCAR1
BICD2		other				3.98E-02	STAT1
USP13		peptidase				3.98E-02	STAT1
GP1BA		transmembrane receptor				3.98E-02	AURKB
LDB2		transcription regulator				3.98E-02	BAX
LGALS2		other				3.98E-02	BAX
VSNL1		other				3.98E-02	ITGAV
PLCD4		enzyme				3.98E-02	CCNB1
SCIN		other				3.98E-02	GSN
PPP1CC		phosphatase				3.98E-02	BAX
ANP32E		other				3.98E-02	FN1
CYP4V2		enzyme				3.98E-02	SQSTM1
MK-8776		chemical drug				3.98E-02	MCM2
RRM2B		enzyme				3.98E-02	BAX
DPYSL2		enzyme				3.98E-02	RELA
unsaturated guluronate oligosaccharide		chemical reagent				3.98E-02	RELA
Apela		other				3.98E-02	SMAD4
LOC105374325		other				3.98E-02	BAX
AZD-1208		chemical drug				3.98E-02	CD38
azurin 50-77		biologic drug				3.98E-02	CDK2
GR-MD-02		chemical drug				3.98E-02	LGALS3
4-(4-(3-(4-trifluoromethoxy-phenyl)ureido)cyclohexyloxy)benzoic acid		chemical reagent				3.98E-02	SQSTM1
PDGFRbeta-recognizing cyclic peptide		chemical reagent				3.98E-02	FN1
MRS2211		chemical reagent				3.98E-02	BAX
griseofulvin		chemical drug				3.98E-02	HMOX1
bafilomycin		chemical - endogenous non-mammalian				3.98E-02	SQSTM1
BO-653		chemical drug				3.98E-02	PSMA2
iopanoic acid		chemical drug				3.98E-02	PNPLA2
tipifarnib		chemical drug				3.98E-02	SQSTM1
bilobalide		chemical - endogenous non-mammalian				3.98E-02	BAX
glabridin		chemical - endogenous non-mammalian				3.98E-02	SOD2
centrinone		chemical drug				3.98E-02	BAX
moxifloxacin		chemical drug				3.98E-02	RELA
lomefloxacin		chemical drug				3.98E-02	HMOX1
methyl cellosolve		chemical reagent				3.98E-02	SQSTM1
protoporphyrin IX		chemical - endogenous mammalian				3.98E-02	HMOX1
salsalate		chemical drug				3.98E-02	RELA
salicylamide		chemical drug				3.98E-02	ABCG2
4-methylcatechol		chemical - endogenous mammalian				3.98E-02	HMOX1
mycophenolate mofetil		chemical drug				3.98E-02	FN1
cadmium sulfate		chemical toxicant				3.98E-02	HMOX1
chlorophyllin		chemical toxicant				3.98E-02	HMOX1
SF2523		chemical drug				3.98E-02	SQSTM1
sertindole		chemical drug				3.98E-02	ACTB
Phe-Pro-Arg-chloromethyl ketone		chemical - protease inhibitor				3.98E-02	HMOX1
tiotropium		chemical drug				3.98E-02	MUC5AC
isoacteoside		chemical - endogenous non-mammalian				3.98E-02	HMOX1
thymeleatoxin		chemical toxicant				3.98E-02	SOD2
Co2+		chemical - endogenous mammalian				3.98E-02	NDRG1
Pb2+		chemical reagent				3.98E-02	HMOX1
thyroid hormone		chemical - endogenous mammalian		-1.091		4.01E-02	BCAR1,CDK2,CPT1A,STAT1,STAT5B
E2F2		transcription regulator				4.04E-02	CCNB1,EZH2,MCM2
IL10RA		transmembrane receptor		1.890		4.10E-02	ALDH2,BAX,FN1,HPGD,NAMPT,PROCR,STAT1
CDKN1B		other		0.068		4.11E-02	CDK2,LGALS3,PES1,SOD2
SCH 58261		chemical reagent				4.13E-02	AKT2,CCT5
grape seed extract		chemical drug				4.13E-02	CCNB1,CDK2
PCLAF		other				4.13E-02	CCNB1,KIF4A
mir-193		microRNA				4.13E-02	MYO1C,STMN1
HSPB8		kinase				4.13E-02	CDK2,CPT1A
pitavastatin		chemical drug				4.13E-02	HMGCS1,LSS
carvedilol		chemical drug				4.13E-02	HMOX1,RELA
dimethyl fumarate		chemical drug				4.13E-02	FN1,HMOX1
glycyrrhizic acid		chemical drug				4.13E-02	MUC5AC,RELA
LMNA	0.685	other				4.16E-02	AHCTF1,CD38,FN1,LMNA,NUFIP2,PNPLA2,STAT1
CLPP		peptidase				4.18E-02	ALDH2,SOD2,STAT1
THZ1		chemical drug	Inhibited	-2.000	bias	4.21E-02	FN1,GADD45GIP1,LGALS3,SERPINB1
levodopa		chemical - endogenous mammalian		-1.212		4.24E-02	BAX,BICC1,CTSC,CTSZ,GATAD2B,LMNA,MYO1B,NEDD4L,PFKP,PPP2R5E,PSAP,RAP1GAP
Ap1		complex				4.25E-02	FN1,HMOX1,HPGD,MUC5AC,NDRG1
RUNX2		transcription regulator				4.31E-02	BAX,DPYSL3,FN1,LGALS3
RBL1		transcription regulator				4.32E-02	AURKB,CDK2,MCM2
miR-199a-5p (and other miRNAs w/seed CCAGUGU)		mature microRNA				4.32E-02	FN1,PALS1,RELA
PLG		peptidase				4.32E-02	BAX,DOCK1,MFGE8
Hif1		complex				4.32E-02	FN1,HMOX1,HTRA2
25-hydroxycholesterol		chemical reagent				4.32E-02	ACAT2,HMGCS1,HMOX1
losartan potassium		chemical drug		-1.506		4.33E-02	BAX,FN1,ITGAV,LGALS3,RBP4
prostaglandin J2		chemical - endogenous mammalian				4.37E-02	HMOX1,PSMA2
fluoromethyl 2,2-difluoro-1-(trifluoromethyl)vinyl ether		chemical toxicant				4.37E-02	HMOX1,LGALS3
PHF12		transcription regulator				4.37E-02	PES1,RRP9
HAND1		transcription regulator				4.37E-02	ADSS2,CPT1A
CNOT7		transcription regulator				4.37E-02	CEACAM6,STAT1
TRPV4		ion channel				4.37E-02	FN1,HMOX1
HSPD1		enzyme				4.37E-02	ALDH2,BAX
rosuvastatin		chemical drug				4.37E-02	HMGCS1,HMOX1
diallyl disulfide		chemical - endogenous non-mammalian				4.37E-02	CCNB1,HMOX1
TAS4464		chemical drug				4.37E-02	CDK2,SLC7A5
IGF1R		transmembrane receptor		0.762		4.40E-02	BAX,CD38,CTNND1,RAB18,RACGAP1,RELA,RPL24
SRSF1		other				4.46E-02	AURKB,FN1,LMNA
TRAF6		enzyme				4.46E-02	MUC5AC,RELA,SOD2
FGF7		growth factor				4.46E-02	ADSS2,CDK2,STAT1
cerivastatin		chemical drug				4.46E-02	FN1,HMGCS1,HMOX1
IL1A		cytokine		0.816		4.48E-02	BAX,HMOX1,HSPG2,ITGAV,RELA,SOD2
GSK3B		kinase		0.415		4.51E-02	BAX,EZH2,FTO,SQSTM1
KLF11		transcription regulator				4.51E-02	ITGAV,SMAD4,SOD2,STAT1
indomethacin		chemical drug		-0.440		4.55E-02	BAX,CCNB1,CPT1A,HMOX1,LGALS3,SLC7A5
miR-141-3p (and other miRNAs w/seed AACACUG)		mature microRNA				4.60E-02	BAX,ITGAV,STAT5B
CCL5		cytokine				4.60E-02	NAMPT,PLEC,STAT1
TFAP2C		transcription regulator				4.60E-02	ADA,ANLN,SOD2
fenretinide		chemical drug				4.60E-02	JAK1,RELA,STAT1
THEM6		other				4.61E-02	DNAJB11,HMGCS1
MALT1		peptidase				4.61E-02	CD38,RELA
ANXA2		other				4.61E-02	BAX,TP53I3
SOST		other				4.61E-02	CPT1A,SOD2
THBS4		other				4.61E-02	CHUK,CRELD2
RAS		group		0.000		4.62E-02	FN1,HMOX1,SOD2,STAT1
estrogen receptor		group		0.000		4.69E-02	ABCG2,AKT2,BAX,FN1,HTRA2,SMAD4
mir-181		microRNA				4.74E-02	BAX,EZH2,MECP2
MAP3K7		kinase				4.74E-02	HMOX1,MUC5AC,RELA
IGF1		growth factor		0.475		4.75E-02	ADA,BAX,CCNB1,CDK2,DDX50,FN1,HMOX1,ITGAV,MUC5AC,NNMT,RELA
MRTFB		transcription regulator		1.000		4.84E-02	ACTB,ANLN,CDK2,HPGD,LMNA
indican		chemical - endogenous mammalian				4.86E-02	HMOX1,RELA
PRKDC		kinase				4.86E-02	ANLN,CCNB1
miR-26a-5p (and other miRNAs w/seed UCAAGUA)		mature microRNA				4.86E-02	EZH2,HPGD
CA9		enzyme				4.86E-02	ATP5F1C,UQCRH
ING1		transcription regulator				4.86E-02	BAX,CCNB1
PSMD10		transcription regulator				4.86E-02	BAX,CDK2
PHB1		transcription regulator				4.86E-02	BAX,RELA
betulinic acid		chemical drug				4.86E-02	BAX,RELA
choline		chemical - endogenous mammalian				4.86E-02	HMOX1,RBP4
eplerenone		chemical drug				4.86E-02	FN1,LGALS3
TIA1		other				4.89E-02	AGR2,CCNB1,PEG10
nelfinavir		chemical drug				4.89E-02	HMOX1,NNMT,PSPH
FIIN-2		chemical drug				4.95E-02	BAX
tauromuricholic acid		chemical - endogenous mammalian				4.95E-02	CPT1A
taurochenodeoxycholate		chemical - endogenous mammalian				4.95E-02	HPGD
chondroitin sulfate		chemical - endogenous mammalian				4.95E-02	FN1
lunasin		biologic drug				4.95E-02	HMOX1
AOPEP		peptidase				4.95E-02	RELA
W146		chemical reagent				4.95E-02	RELA
aurapten		chemical - endogenous non-mammalian				4.95E-02	CPT1A
CYP		group				4.95E-02	HMOX1
cefditoren		chemical drug				4.95E-02	ABCG2
SLC22A2		transporter				4.95E-02	CPT1A
DESI2		enzyme				4.95E-02	CDK2
CYP26A1		enzyme				4.95E-02	RBP4
FENDRR		other				4.95E-02	FN1
NSRP1		other				4.95E-02	FN1
SPATA2		other				4.95E-02	STAT1
ICMT-DT		other				4.95E-02	BAX
YIPF6		other				4.95E-02	PNPLA2
NDST2		enzyme				4.95E-02	FN1
SNHG3		other				4.95E-02	CCNB1
CDH16		enzyme				4.95E-02	CCNB1
SIRT4		enzyme				4.95E-02	HMOX1
PLXND1		transmembrane receptor				4.95E-02	MUC5AC
PCA3		other				4.95E-02	NDRG1
proanthocyanidin derivative		chemical - other				4.95E-02	MFGE8
WAY 200070		chemical drug				4.95E-02	FN1
VTRNA2-1		other				4.95E-02	BAX
ALDH3A2		enzyme				4.95E-02	HMOX1
azilsartan		chemical drug				4.95E-02	ACE2
KPNA4		other				4.95E-02	RELA
SH3GLB1		enzyme				4.95E-02	SQSTM1
AZD1480		chemical drug				4.95E-02	SLC7A5
MIR3936HG		other				4.95E-02	STMN1
omipalisib		chemical drug				4.95E-02	AURKB
FOXK1		transcription regulator				4.95E-02	MCM2
AGAP2		enzyme				4.95E-02	FTO
TAOK2		kinase				4.95E-02	SOD2
AKT1S1		other				4.95E-02	SQSTM1
miR-331-3p (miRNAs w/seed CCCCUGG)		mature microRNA				4.95E-02	KIF23
miR-1285-3p (and other miRNAs w/seed CUGGGCA)		mature microRNA				4.95E-02	AKT2
mir-612		microRNA				4.95E-02	AKT2
MIR378I		microRNA				4.95E-02	SQSTM1
KCND2		ion channel				4.95E-02	BAX
UTS2		other				4.95E-02	HPGD
FBP1		phosphatase				4.95E-02	BAX
PFN1		other				4.95E-02	SQSTM1
FUT4		enzyme				4.95E-02	BAX
DCX		other				4.95E-02	ACTN1
CANX		other				4.95E-02	BAX
CUL5		ion channel				4.95E-02	JAK1
CEL		enzyme				4.95E-02	BAX
BBC3		other				4.95E-02	STMN1
SH3GL1		other				4.95E-02	FN1
VCAM1		transmembrane receptor				4.95E-02	ABCG2
SRSF6		other				4.95E-02	LMNA
CDC27		other				4.95E-02	CCNB1
copanlisib		chemical drug				4.95E-02	AURKB
DDT		enzyme				4.95E-02	BAX
PLAA		other				4.95E-02	ANXA4
HOXD12		transcription regulator				4.95E-02	CCNB1
Muc1		transmembrane receptor				4.95E-02	MUC5AC
RP11_394O46		other				4.95E-02	BAX
ciliobrevin A		chemical reagent				4.95E-02	SMAD4
methylamine		chemical - endogenous mammalian				4.95E-02	FN1
4-vinyl-1-cyclohexene dioxide		chemical toxicant				4.95E-02	BAX
N-hydroxy-N'-(4-butyl-2-methylphenyl)formamidine		chemical reagent				4.95E-02	FN1
L-796449		chemical reagent				4.95E-02	CPT1A
pyrazole		chemical - endogenous non-mammalian				4.95E-02	HMOX1
silicon phthalocyanine		chemical drug				4.95E-02	CDK2
SQ 29548		chemical reagent				4.95E-02	CCNB1
plevitrexed		chemical drug				4.95E-02	CDK2
ethacrynic acid		chemical drug				4.95E-02	HMOX1
phenol derivative		chemical toxicant				4.95E-02	HMOX1
Collagen type V		complex				4.95E-02	ITGAV
aurothiomalate		chemical drug				4.95E-02	HMOX1
opioid		chemical drug				4.95E-02	HMOX1
flavonoid		chemical - endogenous mammalian				4.95E-02	HMOX1
H-8		chemical toxicant				4.95E-02	ALDH3A1
phloretin		chemical - endogenous non-mammalian				4.95E-02	HMOX1
sodium azide		chemical toxicant				4.95E-02	CCNB1
mini-GAGR		chemical reagent				4.95E-02	HMOX1
TH1834		chemical reagent				4.95E-02	BAX
angustibalin		chemical - endogenous non-mammalian				4.95E-02	FN1
SAR407899		chemical drug				4.95E-02	FN1
AL162253.2		other				4.95E-02	STAT1
1-Naphthalenesulfonyl-IW-CHO		chemical - protease inhibitor				4.95E-02	SQSTM1
colcemid		chemical - endogenous non-mammalian				4.95E-02	CCNB1
pergolide		chemical drug				4.95E-02	BAX
azelaic acid		chemical - endogenous mammalian				4.95E-02	BAX
floxuridine		chemical drug				4.95E-02	CCNB1
L-buthionine (SR)-sulfoximine		chemical drug				4.95E-02	HMOX1
N-acetylglucosaminono-1,5-lactone O-(phenylcarbamoyl)oxime		chemical reagent				4.95E-02	OGT
Hg2+		chemical - endogenous non-mammalian				4.95E-02	HMOX1
AR		ligand-dependent nuclear receptor		0.263		4.95E-02	ATP6AP1,C12orf57,EPHX1,GSN,INPP4B,KIF4A,KNTC1,MCM2,MRPL27,MYO1B,NDRG1,SMARCC1,STAT1
vancomycin		biologic drug		-1.987		6.98E-02	GSTK1,HMOX1,LGALS3,MYO1B,SOD2
deferoxamine		chemical drug		1.798		7.20E-02	CCNB1,CDK2,HMOX1,NDRG1,SMAD4
WNT5A		cytokine	Activated	2.216		8.57E-02	BIN1,CD38,FN1,HMOX1,STAT1
ELAVL1		other		-1.951		1.05E-01	CDK2,HMOX1,PSAP,SQSTM1,STAT1
HOXA10		transcription regulator	Activated	2.000		1.15E-01	ACTB,FN1,PHGDH,RELA
SCD		enzyme		1.964		1.25E-01	CPT1A,HMGCS1,MGLL,PNPLA2
ID3		transcription regulator		1.944		1.43E-01	ADSS2,CCNB1,RAP1GAP,SMARCC1
STAT5B	-0.934	transcription regulator	Inhibited	-2.433		1.67E-01	ABCG2,BAX,NNMT,PROCR,RELA,STAT5B
FMR1		translation regulator	Activated	2.000		2.08E-01	ATP5IF1,PFKP,RPL14,RPS15A
quercetin		chemical drug		-1.969		2.17E-01	BAX,HMOX1,MUC5AC,PHGDH
lenalidomide		chemical drug		1.964		2.58E-01	ANTXR1,CD38,FN1,MGLL
cyclosporin A		biologic drug		1.767		3.11E-01	BAX,FN1,HMOX1,IQGAP2,ITGAV,LGALS3
